# Supplementary material for: Development of Transcriptomic Resources for Interrogating the Biosynthesis of Monoterpene Indole Alkaloids in Medicinal Plant Species
Source: PLoS One. 2012 Dec 26;7(12):e52506. doi: 10.1371/journal.pone.0052506 (PMC3530497; doi:10.1371/journal.pone.0052506)
Supplement: Table S3 — Expression abundances reported as fragments per kb transcript per million mapped reads in Catharanthus roseus . (XLSX) [file pone.0052506.s004.xlsx]

## Sheet: SuppTable3
Table S3. Expression abundances reported as fragments per kb transcript per million mapped reads in Catharanthus roseus.
SEQUENCE ID	UNIFIED FUNCTIONAL ANNOTATION	CRA_AA	CRA_AB	CRA_AC	CRA_AD	CRA_AE	CRA_AF	CRA_AG	CRA_AH	CRA_AI	CRA_AJ	CRA_AK	CRA_AL	CRA_AM	CRA_AN	CRA_AO	CRA_AP	CRA_AQ	CRA_AR	CRA_AS	CRA_AT	CRA_AU	CRA_AV	CRA_AW
		Flowers	SC YE 12h	SC YE 24h	SC Ctrol 24h	SS Ctrol	SS MJ 12d	SS MJ 5d	SC YE 6h	SC MJ 6h	SC MJ 12h	SC MJ 24h	SC MJ 0h	Mature leaf	Immature leaf	Stem	Root	TDCi HR	RebH F HR	WT HR	WT HR MJ 0h	WT HR MJ 24h	TDCi HR MJ 0h	TDCi HR MJ 24h
cra_locus_100001_iso_1_len_280_ver_3	Retrotransposon protein, unclassified	0	10.2171	11.3064	16.8536	0	0	0	2.73819	7.27442	7.14381	21.1415	24.2595	0	0	0	0	0	0	0	0	0	0	0
cra_locus_10000_iso_3_len_1405_ver_3	Actin depolymerizing factor 6	22.9711	1.02061	0.704244	0.726657	24.1365	29.5354	15.0053	1.49844	1.68884	4.17898	2.05679	1.00574	11.9771	6.78891	10.4104	38.9335	8.10054	8.40058	9.55244	12.2327	29.7347	14.2967	33.7515
cra_locus_10001_iso_1_len_1375_ver_3	Phospholipase C	7.71776	0.589725	0.925638	0	0.740235	1.78147	0.64634	0.71486	0	0	0.578224	0	3.36318	2.05802	0	1.1967	0	0	0	0	0	0	0
cra_locus_10002_iso_7_len_1772_ver_3	Serine-threonine protein kinase, plant-type	91.5403	159.006	106.228	67.1617	40.243	51.3245	33.5411	208.71	74.9474	51.8627	78.2227	74.104	26.5396	43.4655	110.244	71.329	116.742	98.0139	83.0351	72.6507	59.4084	81.2735	52.8168
cra_locus_100031_iso_1_len_275_ver_3	Gene of unknown function	33.2106	6.70163	21.1028	6.25316	40.7723	39.9893	8.25178	27.1003	10.4587	6.28363	20.7084	10.5011	11.7886	37.049	70.268	13.3381	49.9406	34.205	31.1195	7.89504	7.13441	7.63517	4.09601
cra_locus_10003_iso_1_len_1280_ver_3	Receptor kinase	1.29748	11.0795	14.7176	9.46821	19.9112	15.7272	16.6901	16.9761	12.6714	10.6758	11.5943	12.6848	4.18398	26.8398	12.182	17.7876	13.5926	9.03615	14.1439	15.8355	4.38415	13.5126	6.95616
cra_locus_10004_iso_8_len_2071_ver_3	50S ribosomal protein L3	29.9934	50.3844	46.3707	48.5137	42.8079	37.667	49.875	53.0443	54.6658	66.1003	45.3211	50.2864	39.3147	41.2031	29.8618	33.8313	28.8466	33.8811	30.31	32.655	33.3587	36.986	30.0554
cra_locus_10005_iso_6_len_2368_ver_3	Glycosyltransferase QUASIMODO1	13.717	10.5464	9.14412	8.58252	12.4953	12.6437	19.465	11.8123	12.5255	12.8737	8.50011	7.02103	7.95317	12.0099	9.24544	14.2576	11.5831	9.12079	11.7949	11.2927	8.91038	12.8482	8.92911
cra_locus_100062_iso_1_len_535_ver_3	Conserved gene of unknown function	3.52857	0	0	0	1.70654	3.40225	1.71931	0	0	0	0	0	2.09679	1.8362	3.27841	1.53271	4.66294	4.03134	4.71004	4.09419	0	2.14903	2.71546
cra_locus_10006_iso_2_len_1550_ver_3	WEE1 kinase	0	4.13485	2.54843	1.56761	2.62027	1.89989	5.26216	1.26522	0.600223	0.81303	0.465178	1.39511	0.511538	1.96324	0.971354	2.11802	2.40711	1.73229	2.75398	4.51175	0.865416	4.35457	2.34876
cra_locus_100073_iso_1_len_440_ver_3	Pyruvate decarboxylase	0	0	0	0	0	0	0	0	0	0	0	0	0	0	0	0	0	0	0	0	0	0	0
cra_locus_100078_iso_1_len_311_ver_3	Estradiol 17 beta-dehydrogenase	0	0	0	0	0	0	0	0	0	0	0	0	0	0	0	0	0	0	0	0	0	0	0
cra_locus_10007_iso_1_len_974_ver_3	Conserved gene of unknown function	16.3745	16.4763	17.7254	15.4642	21.0166	20.6247	17.737	19.2731	14.4911	18.9746	16.0974	17.1827	11.8261	21.2426	18.9796	14.3305	17.994	23.0249	18.8003	18.0859	16.3667	14.9591	16.3817
cra_locus_10008_iso_1_len_2028_ver_3	Cysteine protease ATG4	42.1957	30.9114	30.9209	32.5893	34.9232	31.6184	35.3096	27.6427	30.3081	37.0862	30.1561	30.3686	30.1822	28.0882	42.265	37.245	34.5547	45.9198	33.8523	41.3892	45.4899	40.3037	41.333
cra_locus_10009_iso_6_len_1537_ver_3	F-box/LRR-repeat protein	31.3219	91.022	140.224	147.554	25.5476	21.2012	51.2292	36.5976	45.735	46.4552	97.8258	202.69	10.8818	10.1171	23.8533	26.4266	9.60353	27.0538	11.7335	19.3188	13.7478	24.255	23.5686
cra_locus_1000_iso_6_len_1232_ver_3	PsbP domain-containing protein 5, chloroplastic	5.26205	4.66954	2.4741	3.8361	17.6688	9.76174	26.1787	4.45622	10.4864	7.5554	3.94056	4.60147	20.4611	23.3078	2.41111	5.75252	1.42025	0.918474	1.20068	2.69075	1.36772	2.30087	1.52289
cra_locus_100108_iso_1_len_390_ver_3	Uncharacterized GPI-anchored protein	0	0	0	0	0	0	0	0	0	0	0	0	2.74306	0	0	0	0	0	0	0	0	0	0
cra_locus_10010_iso_9_len_3260_ver_3	Origin recognition complex subunit	13.2457	40.1392	38.1969	48.9192	12.0677	12.5974	17.0889	34.9493	38.5561	42.9812	31.2271	40.4331	12.4563	14.7111	17.9252	17.1901	13.7237	12.6794	12.9644	15.4284	12.0182	14.4719	12.2759
cra_locus_100113_iso_1_len_307_ver_3	Pectin methylesterase isoform alpha	0	0	0	0	0	0	0	0	0	0	0	0	0	0	0	0	0	0	0	0	0	0	0
cra_locus_10011_iso_2_len_5021_ver_3	Chromodomain helicase DNA binding protein	43.3206	102.817	108.623	102.906	53.3838	52.6527	45.7526	133.988	105.389	108.724	91.9854	100.706	34.1332	48.6342	53.1849	49.6549	48.4054	46.8557	47.959	37.5312	33.3557	45.0315	39.8188
cra_locus_10012_iso_7_len_1693_ver_3	Serine hydroxymethyltransferase 4	66.0702	107.955	96.4631	106.172	66.4637	61.0402	56.5692	98.8388	109.18	95.2359	81.9364	103.404	50.8385	63.2797	51.7896	41.3731	47.5253	70.1304	48.0458	60.6153	74.8196	51.9228	51.0305
cra_locus_10013_iso_3_len_4301_ver_3	Geminivirus Rep-interacting motor protein	30.1933	56.9286	85.1766	87.9864	39.0893	33.1741	34.7147	47.1383	66.5394	60.8177	41.3392	75.2848	98.8954	82.2172	24.4362	42.7881	23.3873	21.0496	28.1985	29.2176	16.1764	28.5783	17.2182
cra_locus_100143_iso_1_len_510_ver_3	Gene of unknown function	1.91222	9.52068	10.361	19.0286	0	2.04519	1.92925	8.71611	11.388	16.0683	12.3561	14.7692	2.79398	1.4779	2.73668	2.85265	2.02978	0	0	0	0	0	0
cra_locus_10014_iso_2_len_1324_ver_3	Retrotransposon protein, unclassified	0.584916	1.74455	1.06899	1.78179	0	0.759643	0	1.22066	0	1.1459	0.928812	1.78107	1.03776	1.17457	0.922004	0.59888	1.50783	0	0.613457	0	0	0	0
cra_locus_100173_iso_1_len_288_ver_3	SKIP interacting protein 15	0	0	0	0	0	0	0	0	0	0	0	0	0	0	0	0	0	0	0	0	0	0	0
cra_locus_10017_iso_3_len_1687_ver_3	Lysophospholipase	149.457	41.2095	32.062	29.8285	49.5975	60.4453	37.6394	76.8534	39.1946	55.0437	27.9942	26.4871	87.7962	71.5299	72.844	85.2046	44.753	44.24	28.9667	29.8317	41.614	35.1181	53.2041
cra_locus_100198_iso_1_len_311_ver_3	RNA recognition motif-containing protein	0	0	0	0	0	0	0	0	0	0	0	0	0	0	0	0	0	0	0	0	0	0	0
cra_locus_1001_iso_10_len_3751_ver_3	Sumo ligase	67.4928	58.0243	55.158	52.8808	39.1904	41.5122	31.1651	63.0044	37.8626	62.1299	68.8336	67.6702	36.2591	36.2507	45.3465	44.2544	50.1889	61.4506	41.2523	46.2673	54.2269	45.2312	52.8888
cra_locus_10020_iso_4_len_3569_ver_3	Lupus la ribonucleoprotein	28.1681	48.261	46.5945	40.2385	44.7328	41.5796	32.4724	57.7204	55.4703	54.1981	28.8411	40.1094	29.9112	30.7998	42.5061	40.311	44.2885	37.0469	45.8214	37.5635	22.0003	37.9783	24.5824
cra_locus_10021_iso_4_len_2176_ver_3	Narf	11.0125	8.8162	7.73736	10.2814	7.08479	7.33107	7.64485	6.43431	12.7178	10.5691	6.0307	7.69188	7.84079	6.92214	13.4851	10.5033	8.7916	9.61974	8.57768	12.7247	13.2325	10.4519	9.64228
cra_locus_10022_iso_1_len_1655_ver_3	ATP-dependent RNA helicase	8.01921	14.2697	19.1986	23.3674	10.2945	9.68007	11.1288	12.5538	18.4262	17.1499	14.7512	16.7384	9.87461	10.1818	9.29398	7.48472	8.35618	7.68397	8.61673	7.72413	8.09531	7.96436	7.09828
cra_locus_10023_iso_9_len_2396_ver_3	Lipid-A-disaccharide synthase	4.34301	6.19105	4.41563	6.33637	6.53855	6.2081	8.06143	3.54242	6.20618	6.37378	3.01906	3.66388	7.02238	5.29226	7.02572	8.69534	8.35257	4.12942	6.13281	6.6736	6.02446	7.97692	4.83743
cra_locus_10025_iso_1_len_1072_ver_3	Calmodulin	56.7503	3.10272	6.50362	5.6782	52.7314	33.6598	9.00835	4.21729	28.4075	16.6582	3.66318	8.84559	4.20458	3.44077	13.5864	10.9248	90.4089	48.1606	115.567	35.7525	34.18	29.287	6.93819
cra_locus_10026_iso_1_len_1977_ver_3	Pentatricopeptide repeat-containing protein	14.4705	49.117	53.1565	57.8828	25.642	23.5771	26.1409	45.1605	57.7723	55.8954	48.743	46.8875	20.152	23.0604	15.2452	21.4682	11.3604	12.1296	14.0141	15.1546	15.7667	12.3315	13.1666
cra_locus_10027_iso_1_len_1550_ver_3	Calcium-dependent protein kinase	25.807	12.8661	10.3072	11.3522	19.8699	18.7561	16.4535	14.1657	46.6256	42.6023	9.04766	11.4639	16.0195	19.9177	30.952	23.082	28.8581	26.4589	31.6704	27.6658	26.8997	27.7521	26.7995
cra_locus_10028_iso_3_len_1275_ver_3	Conserved gene of unknown function	14.5466	8.77176	14.9989	9.19756	12.4211	15.1488	6.88903	14.2311	18.5172	16.9216	11.1298	11.7731	8.7989	11.2065	13.9197	10.3419	19.6544	19.7819	16.8669	10.7033	6.95476	10.8693	7.05759
cra_locus_10029_iso_3_len_2372_ver_3	Translation initiation factor 2b, delta subunit	23.6232	15.2453	12.2304	14.9691	16.6981	18.4083	23.3181	11.9974	23.2725	25.4132	19.2058	16.0657	17.1471	19.0487	36.9911	25.2074	15.522	18.3555	12.268	12.1576	18.7735	14.1764	24.9041
cra_locus_1002_iso_2_len_1364_ver_3	Pollen Ole e 1 allergen and extensin	81.9068	0.914746	1.08881	1.84363	37.9635	32.6991	57.9982	1.4415	0.808186	1.11157	0.582989	1.38217	94.3621	88.576	12.0088	24.9355	116.525	72.8976	48.5799	49.5608	2.46498	95.0048	7.47909
cra_locus_10030_iso_3_len_7753_ver_3	Transcriptional regulator	29.2939	82.1739	63.1593	90.7153	27.0201	25.7588	30.3056	55.9154	79.728	69.2516	51.9477	63.7241	21.8313	20.3024	29.4817	37.985	30.9472	25.6501	31.6597	25.4465	23.1057	23.6388	23.4459
cra_locus_10031_iso_4_len_1796_ver_3	Ran GTPase binding protein	3.98054	9.95193	7.20767	6.48566	9.36023	9.2556	3.84029	12.3299	4.88479	7.62826	3.76392	6.10887	1.361	3.00974	25.04	10.5338	20.2134	14.334	11.7711	10.0388	18.6233	10.3499	13.945
cra_locus_100328_iso_1_len_295_ver_3	G protein beta-subunit	0	0	0	0	0	0	0	0	0	0	0	0	4.78636	0	0	0	0	0	0	0	0	0	0
cra_locus_10032_iso_6_len_4116_ver_3	Lipin family protein	25.0335	14.1929	14.1923	15.2247	15.4886	16.9768	13.9922	18.5485	21.038	18.2149	15.8404	11.2192	16.3547	15.3645	20.4794	14.4072	34.3397	19.3613	70.8777	29.7798	32.529	16.1574	28.3748
cra_locus_10033_iso_3_len_1410_ver_3	Conserved gene of unknown function	0.666025	2.78547	1.9046	2.56194	8.5615	3.96238	5.92161	2.78697	8.05305	5.82043	0.666037	1.53655	0	0	28.2364	0	34.1701	24.9259	31.1161	27.4709	5.63946	29.6351	3.71448
cra_locus_10034_iso_4_len_2118_ver_3	Ent-kaurenoic acid oxidase	1.16549	2.25063	2.15372	3.31366	3.81563	3.00207	5.13627	2.79652	8.10478	8.13954	1.15157	1.89907	0.575606	2.05134	32.2594	1.6278	19.6293	19.733	27.5538	26.0321	1.41775	22.7145	1.53473
cra_locus_10035_iso_3_len_1811_ver_3	Conserved gene of unknown function	6.16344	10.0738	8.77838	9.62502	8.79686	8.38413	13.1814	10.9534	18.2104	17.8345	10.6805	10.3546	4.32647	7.5522	6.24701	6.56167	7.67032	6.29586	6.32235	11.9888	10.0335	10.0409	12.0285
cra_locus_100361_iso_1_len_291_ver_3	Gene of unknown function	0	3.26271	4.227	6.75198	0	0	0	3.93485	0	3.77593	0	4.9299	0	0	2.20379	0	0	0	0	0	0	0	0
cra_locus_10036_iso_3_len_2321_ver_3	Acetylglucosaminyltransferase	11.921	22.0314	17.4251	14.1948	10.2302	10.14	10.5014	13.3439	6.22821	5.04467	4.75395	8.73487	6.48066	7.85563	16.7659	12.2595	21.192	44.7962	16.2906	15.5352	8.61452	16.5621	9.4719
cra_locus_10037_iso_3_len_2057_ver_3	Maltose transporter	12.9392	20.1423	11.5703	16.6874	22.5671	17.7357	45.0144	17.1822	25.7414	17.8663	8.4081	9.91744	14.2998	14.9796	19.2618	23.3865	15.0444	15.5487	11.4314	19.9837	13.1976	20.473	14.5894
cra_locus_10038_iso_1_len_1979_ver_3	Conserved gene of unknown function	1.22082	4.72818	2.98166	4.18096	6.438	5.20246	8.38743	3.41881	5.40528	3.1074	3.26555	2.03444	3.26454	6.09304	6.26069	14.226	3.75509	2.52803	2.25921	2.19118	1.18129	4.20769	2.39574
cra_locus_10039_iso_3_len_2645_ver_3	Bel1 homeotic protein	23.6812	11.3669	13.0708	16.5235	11.5531	16.8046	7.53799	9.98352	6.72585	10.3997	15.5247	9.45166	16.1418	13.8031	26.8111	16.4879	22.6726	26.7394	20.8711	18.2636	28.3454	19.3856	30.1837
cra_locus_1003_iso_8_len_1995_ver_3	Polyadenylate-binding protein	53.2585	27.3414	42.2065	19.3225	53.8457	59.3619	32.1947	53.3366	24.2488	30.5804	50.2487	36.6441	19.7123	34.6289	30.6844	22.1332	38.8332	65.0584	48.8318	33.4456	33.5223	33.0494	35.5842
cra_locus_10040_iso_2_len_1482_ver_3	Conserved gene of unknown function	52.1312	6.89175	11.0042	8.84006	38.7662	34.1482	29.6577	16.0824	19.0208	13.1917	49.2305	9.77837	6.66914	14.5375	42.2042	18.9689	52.579	69.7853	59.4963	34.8425	20.4586	28.2347	23.6412
cra_locus_100411_iso_1_len_321_ver_3	Gene of unknown function	13.8968	18.6105	17.7784	21.5991	11.1465	12.6336	14.1023	11.5332	18.4748	17.9987	13.5692	19.5894	17.9252	7.73056	6.11763	17.979	16.7179	6.69474	14.5925	4.87762	6.38615	8.1251	5.33297
cra_locus_10041_iso_1_len_1986_ver_3	Methyltransferase, FkbM family protein	4.94877	12.6674	14.2537	12.3015	15.2059	10.1792	13.8105	14.3638	13.274	11.0582	7.84544	11.3144	10.4815	17.9918	10.9967	10.6695	10.4766	9.77194	9.33665	10.3212	4.09171	10.1027	4.86795
cra_locus_100425_iso_1_len_310_ver_3	NBS domain resistance protein	0	0	0	0	0	0	0	0	5.02102	7.48132	8.56094	6.23819	0	0	0	0	0	0	0	0	0	0	0
cra_locus_10042_iso_1_len_2390_ver_3	Receptor protein kinase	12.5809	0.827572	0.615654	0.71669	9.93121	10.052	12.4299	0.5822	0.386675	0.680899	0	0	13.4813	14.4932	3.8223	3.10796	4.75549	3.31193	4.40482	8.66482	1.34733	9.29516	2.21148
cra_locus_100436_iso_1_len_272_ver_3	Gene of unknown function	2.22653	12.3124	15.0967	13.2937	4.37358	2.78321	2.62543	18.3842	19.4678	28.4982	12.5202	21.2615	0	3.63791	3.80756	5.64661	4.01779	0	0	0	0	0	0
cra_locus_10043_iso_1_len_650_ver_3	Gene of unknown function	1.56825	0	0	0	2.13925	1.98015	1.8679	0	0	0	0	0	2.9614	1.75695	0	2.01741	0	0	0	0	0	0	0
cra_locus_10044_iso_2_len_2768_ver_3	Conserved gene of unknown function	5.76801	8.76097	10.5127	8.84551	5.89302	6.48732	7.07243	9.13371	7.66616	6.70456	7.56875	8.89249	6.99829	8.80787	12.1603	13.3516	7.33697	10.5506	7.51475	5.1054	5.80696	6.17169	4.38109
cra_locus_10045_iso_4_len_1809_ver_3	MRNA, clone: RTFL01-40-A21	26.9916	1.81806	2.33316	0.95062	19.5913	33.2633	39.8819	1.77613	3.0307	5.73152	13.3557	1.5031	8.10634	11.6459	21.251	16.0539	20.8428	11.0301	18.0552	21.9677	26.5601	20.2709	30.1565
cra_locus_100462_iso_1_len_1523_ver_3	Conserved gene of unknown function	7.13429	16.5113	12.7871	18.1216	6.44675	7.40766	9.08406	11.3628	20.8319	20.9	9.70849	13.3387	5.63393	4.50647	5.97184	8.94465	6.09929	4.66501	7.78282	4.59329	3.74449	3.90393	4.35322
cra_locus_10046_iso_1_len_904_ver_3	Gene of unknown function	3.2772	5.443	5.22095	7.82323	5.99712	4.00522	10.8705	4.79137	6.82926	5.65311	4.12393	6.11549	3.88014	5.287	4.55703	8.04526	4.46319	4.27399	5.19989	4.43927	3.2594	4.85803	3.24532
cra_locus_100471_iso_1_len_373_ver_3	21kD protein	0	0	0	0	0	0	0	0	0	0	0	0	5.75724	0	0	0	0	0	0	0	0	0	0
cra_locus_100475_iso_1_len_279_ver_3	Gene of unknown function	3.89554	0	0	0	0	3.19715	2.31993	0	0	0	0	0	0	2.87135	3.92994	0	3.90529	11.5592	6.06654	0	0	0	0
cra_locus_10047_iso_2_len_2819_ver_3	Pentatricopeptide repeat-containing protein, chloroplastic	8.22236	10.4611	9.94841	8.1876	20.2128	16.5719	13.6992	10.1984	6.99058	6.05012	12.9842	10.8463	18.1773	24.5602	4.23001	6.52171	2.07046	3.22917	2.58855	2.36682	5.07176	3.86209	2.82356
cra_locus_100488_iso_1_len_281_ver_3	Receptor expression-enhancing protein	0	0	0	0	0	0	0	0	0	0	0	0	0	0	0	0	0	0	0	0	0	0	0
cra_locus_10048_iso_2_len_2497_ver_3	Glycosyltransferase QUASIMODO1	42.5077	48.4169	38.7594	40.1398	62.3059	64.7222	58.8207	72.878	48.9627	43.6424	33.1693	35.6627	41.4704	42.7111	54.3609	64.9514	59.4708	48.1794	59.5499	90.0265	47.0678	90.1234	49.8464
cra_locus_10049_iso_3_len_1780_ver_3	Integrin-linked protein kinase	31.2701	10.5311	8.8152	5.62248	26.1371	29.3197	18.0189	12.3248	13.4611	11.2645	3.27301	7.06041	19.7128	24.7325	28.1241	30.5954	24.3477	25.6293	28.5418	28.9127	12.529	25.97	10.0966
cra_locus_1004_iso_3_len_2128_ver_3	2-oxoglutarate/malate translocator	72.7411	12.1013	10.5524	6.77897	54.7783	77.3012	98.6439	19.5151	9.80592	11.5767	9.94393	6.54915	87.9514	124.095	32.9709	44.2814	39.3816	53.8958	35.4738	67.5461	87.0111	70.5033	59.6567
cra_locus_10050_iso_4_len_2050_ver_3	Membrane associated salt-inducible protein	12.4219	7.88544	9.76095	7.07866	12.588	11.2259	8.26496	8.73986	5.79031	7.61796	8.12214	10.317	8.67961	13.7701	14.5527	10.125	11.0708	12.869	13.1505	11.4039	7.54434	11.1524	7.61459
cra_locus_10051_iso_1_len_697_ver_3	RETRotransposon-like family member (retr-1)	22.7596	34.6429	64.3471	27.4034	376.766	224.397	218.448	67.8027	20.7486	25.732	66.5169	80.2437	25.6244	97.6989	314.538	414.835	87.6936	40.5885	63.7877	201.002	55.3384	265.341	90.3675
cra_locus_10052_iso_5_len_2838_ver_3	Nonsense-mediated decay UPF3	40.2944	31.9969	32.0582	30.1467	29.7713	30.2931	26.4492	29.2874	30.9346	32.2031	26.6491	30.0197	29.4107	34.1782	46.841	41.1381	39.9126	42.9358	36.3289	40.2864	39.05	38.4301	37.3385
cra_locus_10053_iso_1_len_756_ver_3	Conserved gene of unknown function	1.04191	2.85559	3.61795	3.70287	2.19281	2.53715	1.7551	3.54504	3.65313	3.35935	2.28697	3.74353	0	0	1.5689	2.29768	3.13354	1.28602	2.08615	4.8087	0	6.5269	2.01599
cra_locus_100542_iso_1_len_434_ver_3	BTB/POZ domain-containing protein	0	0	0	0	0	0	0	0	0	0	0	0	0	0	0	0	0	0	0	0	0	0	0
cra_locus_100543_iso_1_len_415_ver_3	Gene of unknown function	0	3.95462	5.55889	4.58295	0	0	0	1.95859	2.79515	3.84441	5.68229	6.6924	0	0	1.93251	1.70009	0	0	0	0	0	0	0
cra_locus_10054_iso_5_len_1906_ver_3	Exonuclease	6.48565	6.994	7.41217	7.21195	21.9053	14.3145	20.3627	6.774	7.03043	4.87532	5.12653	7.27459	26.7176	33.9368	13.4635	12.618	6.67527	12.5884	9.15744	13.5894	8.12313	13.8513	8.00355
cra_locus_10055_iso_1_len_2728_ver_3	Glutamyl-tRNA synthetase, cytoplasmic	53.4031	48.1642	36.2371	35.9064	50.2054	52.531	55.6774	60.4782	69.2492	64.2821	48.9429	34.7298	25.2894	36.1161	36.3707	48.2522	51.3061	42.6388	52.8477	64.1877	88.8424	72.1545	75.7182
cra_locus_10056_iso_3_len_897_ver_3	Peroxisomal small heat shock protein	7.91624	12.5917	30.9404	39.5202	13.698	8.07504	9.555	9.89756	18.6451	16.2413	17.1178	27.8479	8.06734	13.2306	8.46608	12.1652	3.56185	4.5043	6.24026	1.64086	2.52745	2.16388	2.11064
cra_locus_10057_iso_4_len_3038_ver_3	MRNA, clone: RTFL01-15-G21	36.9329	41.5382	43.7294	34.201	35.5629	35.4312	25.7898	44.7913	25.8168	28.0695	35.0123	37.6826	24.5646	23.3101	29.0917	22.7805	48.2375	55.7871	45.2669	59.9845	55.3743	60.2528	52.7874
cra_locus_10058_iso_5_len_2541_ver_3	GPI-anchor transamidase	11.3508	8.45885	4.95983	6.12371	9.54577	10.5736	15.1229	6.18339	5.68274	5.66127	2.64763	4.22366	12.7835	10.9653	12.1995	17.0993	14.9635	11.6393	13.7714	14.4839	7.68539	14.7575	7.94951
cra_locus_10059_iso_7_len_4394_ver_3	Multidrug/pheromone exporter, MDR family, ABC transporter family	83.9646	8.19719	7.15165	9.00411	7.77607	13.6067	9.73945	5.68409	7.1111	6.43098	17.5547	11.6038	22.6374	19.064	3.00074	8.37804	1.28611	1.49932	1.12509	1.00854	2.38733	2.40061	5.51918
cra_locus_1005_iso_4_len_2265_ver_3	Alanine aminotransferase	98.3483	75.5183	85.221	74.8498	228.501	223.386	76.5305	73.4312	69.1122	63.3239	46.9896	74.2283	807.117	527.324	33.726	51.7331	33.6574	35.1608	43.8135	44.1826	42.9245	33.0251	32.7117
cra_locus_10060_iso_5_len_4029_ver_3	Chromatin remodeling complex subunit	27.891	25.6754	26.2506	22.6511	23.3978	27.2065	19.2699	35.9623	34.5257	33.806	30.8486	26.6169	18.9561	24.761	20.0322	20.9547	20.6858	19.7824	23.0384	19.7779	16.8651	21.0562	20.1066
cra_locus_100613_iso_1_len_304_ver_3	Gene of unknown function	8.8535	15.6526	33.2242	6.43279	4.58928	14.3089	0	74.6015	10.8647	24.9572	107.031	35.2264	0	4.20886	4.40513	0	6.21296	20.3986	17.0703	0	5.58429	0	5.66265
cra_locus_10061_iso_4_len_2784_ver_3	Kinesin light chain	40.6522	7.71275	7.38651	7.92868	31.6809	28.2088	22.4625	12.0743	18.4666	17.5954	7.03684	9.07526	31.7587	27.6276	39.6668	35.6863	46.365	44.3327	52.088	41.358	22.8142	42.2333	25.7017
cra_locus_100622_iso_1_len_337_ver_3	Patatin 3	0	0	0	0	0	0	0	0	0	0	0	0	0	0	0	0	0	0	0	0	0	0	0
cra_locus_100628_iso_1_len_313_ver_3	Avr9/Cf-9 rapidly elicited protein 65	0	0	0	0	0	0	0	0	0	0	0	0	4.98111	0	0	0	0	0	0	0	0	0	0
cra_locus_10062_iso_1_len_885_ver_3	Conserved gene of unknown function	1.32734	0	0	0	2.56073	7.46997	1.28734	0.883195	0	0	0	0	0	1.90766	7.58715	2.57866	4.46721	3.7731	5.73716	4.53781	4.86948	2.19422	5.02953
cra_locus_10063_iso_1_len_765_ver_3	Retrotransposon protein, Ty3-gypsy subclass	1.39672	2.90363	3.29158	3.55308	1.35375	1.3366	0.788019	1.77425	0	3.02434	1.73039	2.13099	0.96103	0.888327	1.47211	2.18853	1.98979	1.8477	2.94378	0	0	2.01471	1.86688
cra_locus_100649_iso_1_len_445_ver_3	Gene of unknown function	1.43065	0	0	0	2.71443	4.58171	3.62489	3.13905	0	1.63495	0	0	0	0	10.7487	2.43793	22.687	12.2588	19.9648	5.60245	16.8756	4.75266	12.9916
cra_locus_10064_iso_3_len_2480_ver_3	Aspartic proteinase nepenthesin-1	32.9794	23.0436	14.798	17.3535	22.3581	22.7271	23.7577	29.0225	33.6244	31.0037	20.5823	16.7129	17.4882	15.0661	30.9815	18.3768	26.423	24.933	21.6279	20.761	21.5713	26.9825	25.937
cra_locus_10065_iso_1_len_766_ver_3	Gene of unknown function	0	0	0	0	0	0	0	0	0	0	0	0	0	0	0	0	0	0	0	0	0	0	0
cra_locus_10066_iso_1_len_1255_ver_3	Chitinase	0.838491	40.0919	33.0278	23.4004	12.4071	10.2306	11.2117	42.2126	14.2837	9.38054	22.2187	28.2949	0.576932	0	45.8758	0.632585	28.3367	20.7979	74.4002	58.2971	28.9886	14.4332	5.97727
cra_locus_10067_iso_4_len_2779_ver_3	Phosphatidylinositol-3,4,5-trisphosphate 3-phosphatase and dual-specificity protein phosphatase PTEN	11.0865	9.45864	7.72709	8.16685	14.2268	14.8231	19.3609	10.2718	17.1421	14.0525	8.69626	6.37429	9.38804	14.6867	13.9169	14.9686	973.039	12.8573	13.6037	15.043	10.8096	485.523	557.488
cra_locus_100684_iso_1_len_304_ver_3	O-methyltransferase	0	0	0	0	0	0	0	0	0	0	0	0	0	0	0	0	0	0	0	0	0	0	0
cra_locus_100685_iso_1_len_318_ver_3	Dirigent 2	0	0	0	0	0	0	0	0	0	0	0	0	0	0	0	0	0	0	0	0	0	0	0
cra_locus_10068_iso_6_len_3051_ver_3	ATP-dependent DNA helicase Q-like 3	10.402	12.5877	14.8421	14.4309	12.3528	12.9803	14.2788	13.5092	14.4183	14.2813	6.76631	7.2965	8.87073	12.6451	8.84197	8.9822	9.88061	11.0251	11.1605	10.9256	9.07441	10.337	9.24504
cra_locus_10069_iso_3_len_2881_ver_3	Transferase, transferring glycosyl groups	7.75906	3.98213	4.65978	6.17576	6.6843	7.13572	4.97212	5.13296	10.7672	10.4714	6.40057	6.89035	5.48097	6.86166	6.91304	7.17481	8.24443	5.42389	5.57102	6.62829	6.92303	7.72957	9.21798
cra_locus_1006_iso_8_len_2456_ver_3	Sphingosine phosphate lyase	59.0314	42.2157	40.3268	38.0291	21.5118	25.2825	34.4596	29.1679	43.2242	55.9714	89.149	52.0789	18.1274	14.2546	13.4695	13.544	18.4376	20.0666	18.1221	18.7256	41.1739	20.4065	41.7812
cra_locus_10070_iso_3_len_2753_ver_3	Conserved gene of unknown function	4.11148	12.1939	5.89515	2.37179	33.8703	26.4533	26.8699	40.2683	5.24047	5.44766	5.27275	3.01435	24.9015	44.3619	11.7066	24.1127	26.224	11.9191	22.6154	27.6164	5.19464	32.0808	8.50779
cra_locus_100711_iso_1_len_319_ver_3	Gene of unknown function	4.29106	7.15867	5.72832	5.56962	4.58095	5.72434	5.59983	5.45089	7.44089	8.10198	7.31934	7.63527	0	3.03798	3.37837	6.78863	5.8916	3.81008	0	0	0	0	3.47455
cra_locus_10071_iso_4_len_978_ver_3	Actin-depolymerizing factor	36.9426	68.8427	67.7563	68.3611	40.9442	41.5591	47.3321	64.9624	51.8153	60.1679	73.4725	66.0089	42.222	22.557	25.9475	52.7081	42.1796	69.2298	34.0553	56.9616	28.6061	65.8324	43.289
cra_locus_10072_iso_3_len_1801_ver_3	Cleavage and polyadenylation specificity factor	94.4695	51.9279	60.858	47.4418	51.2423	58.8813	36.9526	67.6427	51.1924	51.1536	71.8317	62.1658	28.5003	39.4141	53.368	40.6695	54.5922	107.25	60.6458	61.232	78.183	57.9631	87.5695
cra_locus_10073_iso_1_len_839_ver_3	Conserved gene of unknown function	0.935143	0	0	0	3.28019	1.21449	1.28885	0	0	0	0	0	0	0	2.25142	0	1.30578	2.30848	1.6049	3.51671	0	0	1.35706
cra_locus_10074_iso_2_len_1076_ver_3	Gene of unknown function	1.34357	0.991411	1.25609	1.46922	1.07851	1.11575	0.775525	0.722078	0.951226	0.767719	1.21639	1.14553	1.08091	0.778992	1.14144	1.08261	0	0	0	0	0	0	0.962386
cra_locus_100762_iso_1_len_373_ver_3	Plastid thioredoxin M	0	0	0	0	0	0	0	0	0	0	0	0	0	0	0	0	0	0	0	0	0	0	0
cra_locus_100764_iso_1_len_289_ver_3	Gene of unknown function	0	0	0	0	0	0	0	0	0	3.56717	0	0	0	0	0	0	0	0	0	0	0	0	0
cra_locus_10076_iso_5_len_2562_ver_3	Ring finger protein	14.9733	16.5364	16.5596	15.82	13.4788	14.6366	13.349	18.0165	17.8899	22.1888	14.3295	18.7943	9.6059	9.76106	16.6014	12.9772	20.2678	23.3876	19.5877	15.6417	23.9043	14.5571	22.7467
cra_locus_100778_iso_1_len_280_ver_3	Conserved gene of unknown function	0	0	0	0	0	0	0	0	0	0	0	0	0	0	0	0	0	0	0	0	0	0	0
cra_locus_10077_iso_6_len_1462_ver_3	Floral binding protein number 7	0	0	0	0	0	0	0	0	0	0	0	0	0	0	4.44215	13.4885	1.93039	0	1.41115	0.993905	1.22475	1.86259	0
cra_locus_10078_iso_4_len_1916_ver_3	Ubiquitin conjugating enzyme	36.6146	64.5539	64.4119	100.473	32.6663	35.2545	31.043	40.1008	70.7674	63.0105	47.5065	105.167	28.9	32.6064	65.0036	40.9415	44.6252	50.4019	43.5927	35.6118	34.2968	31.9564	36.3591
cra_locus_100799_iso_1_len_298_ver_3	Conserved gene of unknown function	0	0	0	0	0	0	0	0	0	0	0	0	0	0	0	0	0	0	0	0	0	0	0
cra_locus_10079_iso_6_len_2135_ver_3	Calmodulin-binding protein	27.001	12.0611	10.9117	7.34078	10.3452	12.758	8.39955	10.0841	8.86693	11.0685	11.0532	9.24348	8.43005	7.7784	19.0319	14.2204	17.8096	17.4347	22.5647	15.6161	10.9379	15.2085	10.091
cra_locus_1007_iso_1_len_1901_ver_3	Conserved gene of unknown function	6.58968	9.10018	7.61684	8.75141	11.6029	11.4625	6.56817	8.92151	15.1625	9.24821	3.77957	6.50548	4.38295	2.84048	16.9578	15.3606	12.2996	13.3484	14.4287	10.7207	4.92205	10.139	4.35499
cra_locus_10080_iso_2_len_689_ver_3	Thioredoxin-like U5 small ribonucleoprotein particle protein	132.557	129.705	91.9749	111.175	126.809	125.389	159.012	131.522	136.941	153.266	101.414	104.421	77.3763	86.5823	162.043	151.133	131.409	133.157	139.079	125.359	145.258	112.485	122.691
cra_locus_10081_iso_5_len_1950_ver_3	COMPASS component SWD2	5.06968	8.7727	7.02621	7.96765	5.60159	5.18498	6.91389	8.47928	7.56066	9.59167	6.15089	7.82837	4.60254	5.1685	5.97117	5.58999	3.72707	5.57484	3.68434	3.23528	3.25477	3.91099	3.57633
cra_locus_10082_iso_3_len_1528_ver_3	BHLH-like DNA binding protein	125.101	21.9145	41.5118	22.2173	12.1858	29.6959	8.8603	32.7825	39.421	23.3877	29.3587	33.1125	5.14327	11.156	7.92317	2.90527	7.76151	48.9893	15.6582	10.7107	13.6108	6.5288	15.9493
cra_locus_100835_iso_1_len_342_ver_3	Zinc finger protein	0	0	0	0	9.76196	11.786	2.22357	0	0	0	0	0	0	5.79792	6.80384	7.24278	0	0	0	0	0	0	0
cra_locus_10083_iso_8_len_2984_ver_3	Serine-threonine protein kinase, plant-type	11.6083	12.1705	12.3209	13.9252	9.62077	8.84282	7.8116	10.6989	27.3278	25.2764	11.0141	11.3022	7.39632	8.93339	22.6934	13.9302	22.7148	18.1493	17.157	14.7663	9.46576	18.1653	8.98967
cra_locus_100841_iso_1_len_427_ver_3	Ultraviolet-B-repressible protein	0	0	0	0	0	0	0	0	0	0	0	0	61.4905	0	0	0	0	0	0	0	0	0	0
cra_locus_10084_iso_3_len_2040_ver_3	Gene of unknown function	7.50632	13.6328	13.5612	16.1018	6.87029	7.73513	6.77751	9.29597	17.251	17.4947	15.7973	13.855	5.10001	5.93473	10.4748	6.85277	8.94113	9.80539	8.47542	8.69201	7.69095	6.68539	8.1535
cra_locus_100854_iso_1_len_279_ver_3	Glyoxalase/bleomycin resistance protein/dioxygenase	0	0	0	0	0	0	0	0	0	0	0	0	0	0	0	0	0	0	0	0	0	0	0
cra_locus_10085_iso_3_len_2977_ver_3	Pentatricopeptide repeat-containing protein, chloroplastic	7.08427	18.8894	24.5829	19.5154	17.9353	14.5992	9.54177	25.5984	23.1979	24.0989	17.1364	20.3422	12.0686	21.9545	13.5868	12.6277	7.86556	9.11063	6.22254	5.49011	5.43248	6.23714	3.7287
cra_locus_10086_iso_1_len_549_ver_3	Gene of unknown function	0	0	0	0	0	0	0	0	0	0	0	0	0	0	0	0	0	0	0	0	0	0	0
cra_locus_10087_iso_1_len_1562_ver_3	Leucine-rich repeat-containing protein	0.42352	1.83218	1.44485	1.95671	1.16989	1.56416	1.62682	1.43465	1.35347	0.564666	1.8923	2.28693	0	0	5.89355	0	1.43296	0	1.50754	1.18245	0.715535	2.64388	5.79606
cra_locus_10088_iso_6_len_4009_ver_3	RING-finger protein	8.79541	14.329	14.6086	16.6196	10.4476	8.38834	9.35549	14.4883	11.1771	12.4594	14.3463	15.1139	6.69997	8.38596	9.21872	5.09638	13.8394	11.0834	15.0067	11.2562	8.54381	9.06588	5.75387
cra_locus_10089_iso_1_len_1382_ver_3	Gene of unknown function	0	0	0	0	0	0	0	0	0	0	0	0	0	0	0	0	0	0	0	0	0	0	0
cra_locus_1008_iso_6_len_1077_ver_3	UNC50m	24.9357	17.2457	15.5871	15.6323	16.4158	18.715	16.6025	22.0351	15.6011	20.1776	19.2412	16.1102	11.2712	25.5783	24.8705	15.996	22.8243	20.5997	18.0552	18.7794	18.0028	18.9598	18.5301
cra_locus_100906_iso_1_len_342_ver_3	DnaJ protein	0	0	0	0	0	0	0	0	0	0	0	0	0	0	0	0	0	0	0	0	0	0	0
cra_locus_10090_iso_2_len_1991_ver_3	Male sterility MS5	3.254	3.2677	3.81012	2.82253	3.01311	2.88302	3.51773	4.16856	8.7986	7.7525	3.06527	3.10353	1.80254	4.12007	2.51786	2.00683	4.1468	3.24901	4.30674	3.62963	2.29223	2.77117	2.3344
cra_locus_10091_iso_3_len_1211_ver_3	Diadenosine 5',5'-P1,P4-tetraphosphate hydrolase	7.09495	21.4379	27.9328	19.7816	22.4784	20.5466	15.6036	31.864	24.2243	18.8841	23.405	21.1526	9.81389	15.5859	9.62403	8.68114	12.9405	15.46	17.7802	15.1168	8.72335	15.7232	8.83468
cra_locus_10092_iso_5_len_2938_ver_3	DNA binding protein	11.7732	5.41536	4.4495	4.36259	22.9937	19.1489	22.8085	8.22192	10.8415	7.12044	3.45377	4.34498	18.3334	33.4113	13.5938	20.7746	17.0887	13.3585	14.4367	17.4478	5.39219	23.1421	7.30546
cra_locus_100930_iso_1_len_721_ver_3	Bypass1	0	0	0	0	0	0	0	0	0	0	0	0	6.0306	0	0	0	0	0	0	0	0	0	0
cra_locus_10093_iso_2_len_2790_ver_3	Conserved gene of unknown function	31.3145	76.0974	85.011	95.2996	33.9216	34.6945	39.3237	54.3905	42.895	48.6854	68.806	88.0826	38.7347	43.0595	61.96	45.6561	37.4239	48.1151	39.2885	44.3163	36.2328	47.3331	38.2862
cra_locus_10094_iso_1_len_1808_ver_3	Glucan binding protein-2	0	0	0	0	0	0	0	0	0	0	0	0	0	0	0	0	0	0	0	0	0	0	0
cra_locus_100951_iso_1_len_309_ver_3	Choline/ethanolamine kinase	0	0	0	0	0	0	0	0	0	0	0	0	0	0	0	0	0	0	0	0	0	0	0
cra_locus_100959_iso_1_len_386_ver_3	Membrane protein	0	0	0	0	0	0	0	0	0	0	0	0	0	0	0	0	0	0	0	0	0	0	0
cra_locus_10095_iso_6_len_982_ver_3	Superoxide dismutase [Cu-Zn]	283.155	174.72	106.259	78.8504	281.83	397.191	753.123	78.7531	48.8996	53.2667	39.8313	59.1989	303.04	270.855	361.541	601.02	159.049	343.633	138.909	155.701	327.348	158.345	520.101
cra_locus_10096_iso_9_len_2985_ver_3	Nicotinate phosphoribosyltransferase	28.1689	17.7229	15.9228	13.2179	18.7407	22.8588	18.6199	20.5186	33.4673	26.3555	28.2919	13.7952	58.672	25.0123	57.4914	19.1526	9.41312	13.8877	14.4148	16.8638	21.1145	10.434	16.3309
cra_locus_10097_iso_2_len_840_ver_3	Conserved gene of unknown function	30.6882	32.9765	29.7864	39.3579	32.4338	32.3718	37.7596	31.6101	41.7531	44.2194	37.1653	39.4748	22.0655	18.2618	42.3726	40.0905	40.4293	51.8768	24.311	25.2252	22.858	37.5431	37.0473
cra_locus_100982_iso_1_len_758_ver_3	ATP-binding cassette transporter	11.2811	0.837576	0	0	4.64693	2.95189	2.38676	0	0	1.01779	0	0	14.7479	9.11865	1.17343	9.90202	0	0	2.97204	0	0	0	1.88481
cra_locus_10098_iso_2_len_1164_ver_3	Conserved gene of unknown function	7.34108	12.3732	20.6737	16.0604	8.31029	7.80056	3.88358	27.1887	49.0655	61.7764	48.6236	33.7337	3.36521	2.87331	27.1659	13.8763	12.1144	31.0772	20.1709	10.0389	13.5302	27.5227	13.9622
cra_locus_100992_iso_1_len_453_ver_3	Xyloglucan endotransglycosylase LeXET2	0	0	0	0	0	0	0	0	0	0	0	0	0	0	0	0	0	0	0	0	0	0	0
cra_locus_100994_iso_1_len_285_ver_3	Gene of unknown function	0	0	0	0	0	0	0	0	0	0	0	0	2.76296	2.15593	0	0	0	0	0	0	0	0	0
cra_locus_10099_iso_3_len_1907_ver_3	CYP72A57	8.84459	20.5482	10.8912	8.72345	47.0413	58.8318	9.88255	30.9608	6.27541	14.3219	24.338	12.5273	28.1722	16.2949	41.1249	12.4525	79.6706	99.7708	109.331	71.427	58.1166	49.9541	44.1424
cra_locus_1009_iso_3_len_1775_ver_3	Monodehydroascorbate reductase	84.6277	74.1034	137.404	124.842	109.185	95.0425	75.9358	48.6139	53.048	60.5206	123.029	121.322	121.492	84.5744	42.1934	44.1111	35.7873	51.4541	38.7576	54.4315	63.0129	49.9372	65.8944
cra_locus_100_iso_7_len_2049_ver_3	Thioredoxin h	22.8204	17.4412	15.3169	21.9319	23.9717	19.6321	18.1173	13.8818	20.0091	20.6613	12.1542	13.2909	30.1486	18.5303	47.1088	55.9659	30.1677	19.2289	37.1114	22.4985	14.0101	16.8348	12.3798
cra_locus_10100_iso_1_len_2256_ver_3	Zn-finger, RanBP-type, containing protein	28.6194	24.8953	36.4579	21.6547	41.0115	39.0381	28.2048	28.3	13.3417	14.8816	43.3672	44.9076	27.0604	31.5137	37.087	31.0477	31.5285	51.1797	29.8676	29.5353	27.0904	34.8457	27.8877
cra_locus_101013_iso_1_len_782_ver_3	Conserved gene of unknown function	0	18.9746	16.454	8.47788	0	0	0	18.2546	3.63721	9.77142	5.63774	10.5369	0	0	0	0	1.29658	0	25.9918	14.7877	17.7721	0	3.28452
cra_locus_10101_iso_5_len_2542_ver_3	Laccase	1.63627	2.81849	3.36032	4.00943	10.1499	5.92082	3.99271	2.07854	10.2381	5.28995	1.74561	2.49648	3.43386	3.17175	20.9116	38.6481	3.82034	1.21758	4.10965	4.63712	4.23401	2.16357	5.24896
cra_locus_101027_iso_1_len_382_ver_3	Phd finger transcription factor	15.4804	58.9836	93.1392	61.0081	26.1555	31.0031	12.9798	76.1272	64.4207	60.9551	104.226	93.0436	15.2284	15.55	31.7365	27.8853	25.353	31.5417	39.6907	19.8069	21.7519	12.602	25.171
cra_locus_10102_iso_5_len_1954_ver_3	Cinnamoyl-CoA reductase	31.198	20.6809	19.6685	20.9765	34.2643	29.9273	32.6899	15.3881	13.2791	13.2013	15.4004	14.9053	42.9535	38.5844	26.1358	20.3301	25.5281	32.5406	25.024	24.2142	21.9953	31.1202	24.7919
cra_locus_10103_iso_1_len_1832_ver_3	Argininosuccinate synthase	31.5686	30.8514	24.7999	20.0496	63.8081	57.8007	62.5982	50.4315	55.6979	47.9078	19.8958	20.9797	42.2115	55.378	48.0378	57.2091	62.1821	49.7803	50.2701	72.6029	50.2525	72.4829	41.457
cra_locus_101044_iso_1_len_352_ver_3	Proline-rich family protein	0	0	0	0	0	0	0	0	0	0	0	0	0	0	0	0	0	0	0	0	0	0	0
cra_locus_10104_iso_2_len_1571_ver_3	Hydroxycinnamoyl transferase	14.2455	39.7558	15.217	11.7216	152.275	165.033	85.568	125.958	8.39633	15.4377	6.19438	7.17973	16.3757	24.6805	274.564	117.961	385.749	353.701	343.961	248.461	289.807	262.332	272.072
cra_locus_10107_iso_3_len_2142_ver_3	Systemin receptor SR160	0.742563	0.346763	0.655155	0.582405	27.4749	19.9902	51.1087	0.390319	1.92462	1.34606	0	0	5.32246	23.2577	9.21567	16.9402	18.9058	6.51635	23.8913	29.7807	0	24.7021	3.55482
cra_locus_101088_iso_1_len_310_ver_3	Gene of unknown function	3.46578	2.82481	2.46324	2.73715	0	0	0	3.17962	0	0	0	4.59656	0	1.96065	0	2.12305	2.89538	0	3.08416	0	0	0	0
cra_locus_10109_iso_3_len_960_ver_3	Hydrolase, hydrolyzing O-glycosyl compounds	1.27852	0.983769	0	1.23921	10.2026	5.94363	4.98373	1.77174	3.83326	2.9886	0	0	4.93831	6.36978	2.63003	4.2933	7.51555	2.7388	7.67975	6.25837	4.24156	4.77818	8.55998
cra_locus_1010_iso_5_len_2347_ver_3	3,4-dihydroxy-2-butanone kinase	18.9763	26.9736	27.6809	27.7394	26.793	27.2141	39.8331	32.1702	18.475	20.966	25.1819	26.7863	20.2004	21.3602	23.5316	23.3689	17.655	18.5902	18.4135	20.444	21.9099	24.3087	25.8445
cra_locus_10110_iso_2_len_951_ver_3	Conserved gene of unknown function	45.8551	47.4094	50.1447	35.8661	57.6672	58.7452	59.7516	72.2255	51.932	58.0343	68.8295	36.8687	26.7328	39.9486	35.8208	29.6318	51.3531	40.6959	58.3525	52.4467	80.0617	47.4937	62.4354
cra_locus_10111_iso_1_len_1389_ver_3	Phi class glutathione transferase GSTF2	7.2007	14.3669	16.6427	15.2131	35.5563	32.2337	55.4395	18.2434	13.1205	11.0023	11.8096	9.97217	30.7371	34.4253	12.5396	15.6601	13.58	17.5613	13.9662	13.8999	11.937	11.9935	12.5279
cra_locus_101123_iso_1_len_299_ver_3	Gene of unknown function	0	0	0	0	0	0	0	0	0	0	0	0	0	0	0	0	0	0	0	0	0	0	0
cra_locus_10112_iso_1_len_331_ver_3	Conserved gene of unknown function	0	0	0	0	0	0	0	0	0	0	0	0	0	0	0	0	0	0	0	0	0	0	0
cra_locus_101134_iso_1_len_292_ver_3	Hexokinase	0	0	0	0	0	0	0	0	0	0	0	0	0	0	0	0	0	0	0	0	0	0	0
cra_locus_10113_iso_2_len_2189_ver_3	R3h domain containing protein	54.0045	59.5328	54.2681	53.1987	38.5934	38.0003	44.9218	46.6464	39.1534	43.1958	51.4929	55.0994	38.7388	41.3325	50.5663	44.467	37.3089	44.3465	28.4202	32.9691	31.1808	32.6314	32.0182
cra_locus_10114_iso_1_len_1042_ver_3	Chloroplast methionine sulfoxide reductase B2	19.3876	32.6688	42.602	31.2811	66.6848	48.767	49.7531	33.9567	25.1109	24.0788	27.0644	28.6879	75.2694	72.6884	21.6321	30.8885	14.7377	22.3602	19.7838	25.6909	20.3574	16.736	17.271
cra_locus_10115_iso_7_len_2781_ver_3	DNAJ heat shock N-terminal domain-containing protein	6.60581	11.9367	10.1361	11.9898	12.5751	10.992	12.2656	8.94072	9.43942	8.6051	8.45855	8.24704	35.7257	29.0565	7.99975	9.42989	5.29196	6.48574	5.93091	5.83407	5.18165	5.5678	5.39225
cra_locus_101165_iso_1_len_320_ver_3	Universal stress protein	0	0	0	0	0	0	0	0	0	0	0	0	0	0	0	0	0	0	0	0	0	0	0
cra_locus_101173_iso_1_len_643_ver_3	Gene of unknown function	5.63958	8.65172	10.2586	9.14448	3.57001	3.00408	2.73933	14.5517	11.2191	10.473	13.2519	12.6218	4.95353	2.93228	3.90603	3.01203	7.02295	1.93798	6.70452	0	0	0	0
cra_locus_10117_iso_3_len_1614_ver_3	Whole genome shotgun sequence assembly, scaffold_122, strain Mel28	4.3352	10.748	9.47642	10.5787	7.33385	6.32292	9.66027	9.66971	13.719	14.0436	10.5796	9.02223	4.86421	6.81562	8.28053	7.82889	6.67308	8.4726	7.24485	6.69858	6.29775	6.54878	4.97018
cra_locus_10118_iso_3_len_2068_ver_3	Coniferylalcohol 5-hydroxylase	325.106	9.373	4.88831	6.14858	85.416	68.5396	42.24	38.2238	10.1759	9.5521	13.2902	5.06771	8.60299	6.67778	261.607	67.6159	325.84	522.345	398.046	223.397	106.625	208.11	162.223
cra_locus_101197_iso_1_len_351_ver_3	Conserved gene of unknown function	0	0	0	0	0	0	0	0	0	0	0	0	0	0	0	0	0	0	0	0	0	0	0
cra_locus_10119_iso_1_len_756_ver_3	Gibberellin receptor GID1	0	0	0	0	4.11151	4.90516	3.74954	0.0945374	0	0	0	0	0	0	14.277	0	33.6856	11.6911	13.3116	8.1926	5.13	12.5099	11.466
cra_locus_1011_iso_10_len_3108_ver_3	CRS1/YhbY domain containing protein	13.2494	13.1875	15.3092	14.8632	26.1035	25.8794	19.2134	17.4556	17.7634	16.1455	6.52615	11.7459	28.6465	41.0872	19.9355	18.2519	17.7307	19.958	17.6857	11.9008	9.08455	13.7094	9.04414
cra_locus_10120_iso_3_len_2976_ver_3	GJ20426	9.27142	21.9416	20.8802	29.4658	5.139	4.54816	3.05047	13.0134	20.8965	19.0717	19.0629	23.9806	5.42429	4.19374	5.1016	5.72891	7.53693	5.97007	8.43024	5.49197	7.14651	6.13862	5.34628
cra_locus_10121_iso_2_len_1069_ver_3	YEATS domain-containing protein	5.51452	12.2119	11.3143	10.1319	18.2665	18.8589	19.6302	18.9665	18.5142	17.6575	13.4024	7.45173	10.6098	11.2411	11.8747	16.6927	15.9591	18.2247	16.7358	22.2853	12.2348	18.6304	10.129
cra_locus_10122_iso_2_len_1853_ver_3	P-coumaroyl quinate/shikimate 3'-hydroxylase	50.5452	118.738	103.37	71.685	40.4588	63.8769	43.8166	84.592	58.8333	117.967	122.771	84.2172	22.1812	26.9529	1.33887	13.4426	4.9512	5.63832	1.5046	1.63268	4.4502	2.05949	6.72951
cra_locus_101234_iso_1_len_314_ver_3	Gene of unknown function	0	7.28426	5.34308	6.20708	0	0	0	8.92267	4.07692	8.24412	8.68904	10.6827	0	0	0	0	2.85474	0	0	0	0	0	0
cra_locus_10123_iso_5_len_1428_ver_3	Alpha-expansin	27.033	31.7735	12.3196	5.33284	98.1401	233.079	44.0687	7.51643	0.652566	0.530358	3.79308	18.9267	147.91	111.101	143.95	112.727	25.2397	43.4995	8.77592	8.05193	84.366	26.9927	299.489
cra_locus_10124_iso_3_len_4650_ver_3	DNAJ heat shock N-terminal domain-containing protein	11.3688	11.7268	10.2829	11.6511	11.061	10.4911	10.7687	10.9094	12.9852	14.143	9.16377	11.7595	9.2834	9.15576	14.0673	14.9886	12.0958	10.999	12.8	13.2813	9.36446	11.0278	9.733
cra_locus_10125_iso_8_len_1775_ver_3	Translation initiation factor 2B beta subunit	19.9871	32.4181	25.4906	32.1135	18.451	18.4873	22.8538	39.7178	57.231	58.3958	22.2878	22.3515	14.9485	13.8315	23.4878	23.0293	23.3922	26.3355	23.4531	20.1708	20.1666	17.5516	18.8869
cra_locus_10126_iso_7_len_2379_ver_3	DEAD (Asp-Glu-Ala-Asp) box polypeptide 59	9.0942	10.3671	9.13077	11.6844	8.19698	7.79664	11.3528	5.96623	7.41653	7.10398	8.43022	9.54003	6.86249	5.19217	10.0716	12.4392	6.30109	8.24624	6.26937	5.17915	6.3481	5.04793	6.58752
cra_locus_101284_iso_1_len_438_ver_3	IQ-domain 13	0	0	0	0	0	0	0	0	0	0	0	0	1.90232	0	0	0	0	0	0	0	0	0	0
cra_locus_10129_iso_1_len_307_ver_3	Gene of unknown function	0	2.63565	0	0	0	0	0	0	0	2.22413	0	0	0	0	2.07463	3.21894	0	0	2.85765	0	0	0	0
cra_locus_1012_iso_4_len_1703_ver_3	Aminotransferase 1	85.6496	107.711	312.966	387.004	484.29	251.333	14.0318	53.4146	67.9722	67.6299	125.488	357.85	972.626	670.118	2.9184	49.3583	0	0.964689	0	0	0	0	0
cra_locus_10131_iso_1_len_1854_ver_3	Pentatricopeptide repeat-containing protein	4.26908	2.67657	2.35149	2.7394	2.22019	1.65079	2.19281	1.99596	3.45621	3.96395	1.78338	2.02213	2.36419	2.1705	2.76963	2.54975	1.56033	0.978015	1.85993	2.76694	1.44252	2.6542	1.50578
cra_locus_10132_iso_8_len_2383_ver_3	Acyl-CoA synthetase	8.59608	36.9105	23.9055	24.8973	27.3144	33.2753	25.7222	30.0432	17.0995	19.0693	8.38584	17.3232	21.1534	15.0201	35.9499	30.8172	45.2769	37.5144	39.6079	40.9778	20.5031	42.9185	30.3912
cra_locus_101336_iso_1_len_359_ver_3	Disease resistance-responsive family protein	0	0	0	0	0	0	0	0	0	0	0	0	36.6519	0	0	0	0	0	0	0	0	0	0
cra_locus_10133_iso_2_len_4184_ver_3	Myosin VIII-2	22.7748	15.2097	17.0086	17.3449	30.3583	26.7835	16.8341	12.0751	15.1208	12.5001	17.7948	18.4075	28.8885	32.0641	17.4825	25.2271	15.8608	12.3349	20.267	20.5359	11.4311	17.035	11.1774
cra_locus_101341_iso_1_len_345_ver_3	Conserved gene of unknown function	0	0	0	0	0	0	0	0	0	0	0	0	0	0	0	0	0	0	0	0	0	0	0
cra_locus_10134_iso_4_len_2671_ver_3	Aspartic proteinase nepenthesin-1	72.556	26.4852	19.4133	17.5545	45.0787	40.6555	26.5843	34.5464	15.9266	17.7395	52.1145	29.1585	25.9421	20.7057	56.7018	22.5579	62.8217	50.9257	69.4051	54.2517	33.0486	59.3992	33.6312
cra_locus_10135_iso_1_len_1374_ver_3	Gene of unknown function	18.7053	0	0	0	0	0	0	0	0	0	0	0	1.4199	0.68652	0	0	0	0	2.30891	3.36934	1.06022	0	0
cra_locus_101369_iso_1_len_364_ver_3	Signal transducer	0	0	0	0	0	0	0	0	0	0	0	0	0	0	0	0	0	0	0	0	0	0	0
cra_locus_10136_iso_3_len_1243_ver_3	Hypothetical 19.6 kDa protein	8.86889	11.9704	9.06551	9.37664	10.0675	8.81231	12.3736	12.2285	15.3136	16.2472	7.05205	7.14365	7.39946	7.38528	11.5242	10.6145	16.4865	7.35122	9.9348	8.31906	9.57768	8.87581	8.37544
cra_locus_10137_iso_4_len_1428_ver_3	2-deoxyglucose-6-phosphate phosphatase	11.5635	1.57122	1.92957	1.75929	65.0469	31.4669	13.7637	1.12992	2.07635	1.67947	1.46666	2.30814	115.274	92.1568	1.74706	6.56703	0	1.27582	0	0	0	0	0
cra_locus_101380_iso_1_len_409_ver_3	80A08_18	0	0	0	0	0	0	0	0	0	0	0	0	0	0	0	0	0	0	0	0	0	0	0
cra_locus_10138_iso_2_len_1810_ver_3	Hydrolase	10.0554	7.33671	10.299	10.1487	2.79718	2.96889	4.62422	4.36066	7.03659	3.50641	6.83303	9.22077	26.4102	24.9241	2.71069	6.83333	2.69526	4.58138	2.91965	2.3264	2.03246	1.83168	1.69728
cra_locus_10139_iso_4_len_1166_ver_3	Xyloglucan endo-transglycosylase	1.52274	15.4125	58.6854	112.09	28.217	4.05565	19.6388	10.8201	80.7317	34.1511	6.22283	37.488	44.604	51.1979	0.700463	11.3858	19.1773	4.03666	20.7071	25.7363	0	17.7366	0
cra_locus_1013_iso_3_len_3706_ver_3	Starch branching enzyme interacting protein-1	6.06232	9.58151	7.36032	8.7017	4.98585	5.58486	13.2337	10.785	10.0442	11.1151	6.69629	7.27638	3.2894	3.33054	6.43186	8.50166	5.79722	4.9004	5.28348	5.77496	4.62393	5.26942	3.88628
cra_locus_10140_iso_2_len_2780_ver_3	Conserved gene of unknown function	15.5962	3.70661	5.08247	4.33357	3.93569	5.69913	6.00854	2.79811	6.03377	6.83264	10.7249	4.42685	4.26808	3.88217	12.2102	4.44559	1.47874	12.2656	1.57515	5.17727	2.11329	4.67146	4.52847
cra_locus_101419_iso_1_len_301_ver_3	Multi antimicrobial extrusion family protein	0	0	0	0	0	0	0	0	0	0	0	0	7.28122	0	0	0	0	0	0	0	0	0	0
cra_locus_10141_iso_1_len_293_ver_3	Ubiquitin specific peptidase 39	0	0	0	0	0	0	0	0	0	0	0	0	0	0	0	0	0	0	0	0	0	0	0
cra_locus_10142_iso_1_len_1133_ver_3	Conserved gene of unknown function	2.4994	2.59944	3.26023	4.94645	0	2.11628	0	4.3578	3.00705	1.90421	0.833149	2.75776	2.11427	4.43153	30.3543	21.0207	0	11.0862	0.915842	1.64194	0	0	0
cra_locus_10143_iso_3_len_1553_ver_3	M355	42.7086	46.3153	66.9462	47.7936	74.5306	73.627	70.1953	53.7563	41.1704	39.476	64.8111	51.2149	35.5516	53.8823	33.5947	31.7861	33.8467	45.7596	36.3709	52.2077	41.2782	59.6764	51.1201
cra_locus_10145_iso_2_len_1149_ver_3	NADH dehydrogenase	5.70032	2.23521	7.91053	6.52394	67.9064	39.3605	10.0461	3.19097	2.44537	3.69881	2.90595	8.81408	125.675	135.164	0	5.5929	0	0	0	0	0	0	0
cra_locus_10147_iso_1_len_819_ver_3	Gene of unknown function	1.0273	1.62309	1.5771	2.53134	4.28812	2.87961	3.89102	1.04398	1.6809	1.56534	1.61211	1.40141	1.25348	1.86124	1.58729	2.41651	1.13286	2.25934	3.56532	0	0	0	0
cra_locus_101485_iso_1_len_288_ver_3	UPF0426 protein, chloroplastic	0	0	0	0	0	0	0	0	0	0	0	0	6.00811	0	0	0	0	0	0	0	0	0	0
cra_locus_10148_iso_2_len_1352_ver_3	Conserved gene of unknown function	4.17134	0	0	0	18.5264	11.3859	10.0828	0	0	0.747766	0	0	30.0463	24.3882	0.988361	6.40316	0	0.770922	0	0	0	0	0
cra_locus_101499_iso_1_len_313_ver_3	Conserved gene of unknown function	0	0	0	0	0	0	0	0	0	0	0	0	3.48678	0	0	0	0	0	0	0	0	0	0
cra_locus_10149_iso_1_len_3444_ver_3	Serine-threonine protein kinase, plant-type	2.123	1.19794	0.749937	0.990983	1.51715	1.06223	0.560451	1.77105	1.02072	1.43035	0.642273	0.702415	1.34629	0.952152	3.27201	1.64211	0.714731	1.41864	1.73414	1.32701	1.70239	0.463158	1.20705
cra_locus_1014_iso_4_len_2033_ver_3	Protein phosphatase 2c	33.019	54.676	61.204	71.886	46.1387	37.3995	30.7645	51.7523	54.0251	47.2062	47.3882	56.8565	47.1898	37.0595	54.1158	57.0677	36.7014	56.5867	32.6507	38.3138	34.9765	46.1226	43.5382
cra_locus_101503_iso_1_len_305_ver_3	2'-hydroxy isoflavone/dihydroflavonol reductase homolog	0	0	0	0	0	0	0	0	0	0	0	0	0	0	0	0	0	0	0	0	0	0	0
cra_locus_10150_iso_1_len_1780_ver_3	GDP-mannose transporter	30.6212	60.4316	66.5291	80.4718	32.4722	33.9547	28.9163	43.8435	45.5498	37.8895	50.1054	55.166	30.3771	37.3157	80.2525	34.5135	46.0003	38.8323	46.566	44.2195	42.3481	41.7214	44.7284
cra_locus_101513_iso_1_len_284_ver_3	Gene of unknown function	3.39481	0	0	0	0	0	0	0	0	3.39464	0	0	0	0	0	0	0	0	0	0	0	0	0
cra_locus_10151_iso_1_len_766_ver_3	Gene of unknown function	2.78966	14.9956	18.4078	10.7491	2.79394	6.17339	2.20346	22.3811	15.7656	17.5341	6.62415	9.51387	2.1114	5.54446	20.6587	6.63762	51.1123	35.7506	26.458	11.7708	12.0556	20.3881	10.0675
cra_locus_10152_iso_4_len_1268_ver_3	Cyclic phosphodiesterase	6.20086	8.82131	6.9273	11.5464	12.9202	12.5051	18.3029	7.04483	7.70328	8.53356	7.3666	5.51025	8.84861	7.9373	10.5105	13.0486	9.12758	12.7594	11.7745	9.61424	9.56149	13.9626	10.9419
cra_locus_10153_iso_1_len_1829_ver_3	Phospholipase A22	8.80704	17.3001	14.1511	24.0569	8.22917	8.57355	11.1808	10.9584	17.7516	16.9348	12.3426	15.2741	18.5082	11.7875	11.012	13.655	9.35642	7.4606	8.50599	6.97747	8.04404	6.4256	8.24415
cra_locus_101549_iso_1_len_287_ver_3	Poly-A binding protein	0	0	0	0	0	0	0	0	0	0	0	0	0	0	0	0	0	0	0	0	0	0	0
cra_locus_101557_iso_1_len_715_ver_3	Gene of unknown function	4.33784	31.7757	16.1439	31.8419	5.32552	7.1701	7.10182	9.71819	12.4613	20.4601	23.6189	27.5703	1.75283	1.58925	10.2297	5.65269	3.67663	3.22135	10.3172	39.4476	31.6602	4.75543	9.21358
cra_locus_10155_iso_3_len_1338_ver_3	Conserved gene of unknown function	6.90259	6.34382	5.23491	6.46335	6.44448	6.10609	6.51317	8.08572	6.08669	7.98275	5.67542	5.99088	10.2126	9.50314	11.9008	5.469	5.90468	5.71389	6.4	4.1544	4.35749	4.07807	3.35896
cra_locus_10156_iso_9_len_3738_ver_3	Exostosin family protein	16.2066	10.108	11.0479	12.6496	11.1035	8.60339	7.61529	11.1181	18.5054	12.9196	9.04212	9.25332	37.3778	28.2988	9.58738	11.2753	8.02854	5.75183	7.63292	8.41315	6.97956	9.96816	6.34716
cra_locus_101579_iso_1_len_487_ver_3	Gene of unknown function	5.90663	16.798	42.4673	25.1901	3.19066	2.81912	2.40604	16.9571	4.16785	9.31514	44.9548	54.7917	2.00767	5.13664	5.12612	4.8195	4.6187	4.26826	5.20367	0	0	0	0
cra_locus_10157_iso_1_len_1356_ver_3	Conserved gene of unknown function	21.5685	35.292	43.189	45.9049	22.9255	43.0895	57.2115	32.5775	28.6447	34.0606	38.4426	33.3719	88.2682	59.64	38.9436	54.9372	39.6685	47.3328	31.4027	35.1261	125.232	29.7981	103.958
cra_locus_10158_iso_1_len_279_ver_3	Gene of unknown function	0	0	0	0	0	0	0	0	0	0	0	0	0	0	0	0	0	0	0	0	0	0	0
cra_locus_101592_iso_1_len_396_ver_3	Gene of unknown function	4.2753	8.65145	4.14926	4.19149	2.71487	3.51814	2.21247	2.24726	2.93986	4.38039	0	4.2736	4.04732	2.39178	1.87748	3.2511	6.6507	0	9.05218	7.05606	3.58664	4.84849	2.49596
cra_locus_101595_iso_1_len_807_ver_3	Cyclase family protein	4.03318	15.6171	12.9885	10.3797	5.63492	11.7748	6.29902	16.7401	19.6283	22.8878	18.8241	10.2572	1.49977	1.85489	3.80984	2.87544	9.04546	11.4157	16.6161	30.2894	59.6395	16.6453	42.7396
cra_locus_10159_iso_5_len_3217_ver_3	Ribosome biogenesis protein bop1	26.7808	36.716	29.9405	33.9453	31.3367	27.1546	28.8354	31.8851	35.3794	32.8743	25.8335	32.0072	22.8081	28.7316	34.4308	26.161	26.5161	27.4338	25.6895	25.8308	26.8724	29.9853	23.7337
cra_locus_1015_iso_2_len_1057_ver_3	Protein MSF1	17.8946	36.5286	40.9378	36.2872	32.8888	27.3327	31.143	25.8067	21.7982	19.7883	49.8992	47.117	11.2153	20.4184	21.9795	19.1508	26.6716	27.7802	29.5768	27.4576	27.6363	35.5802	31.0982
cra_locus_101603_iso_1_len_300_ver_3	Short-chain dehydrogenase/reductase	0	0	0	0	0	0	0	0	0	0	0	0	0	0	0	0	0	0	0	0	0	0	0
cra_locus_10160_iso_3_len_989_ver_3	Conserved gene of unknown function	18.4858	26.3954	37.3484	41.902	12.3853	11.7844	10.2705	15.7503	22.737	23.3798	27.3433	36.0389	18.7881	23.0622	39.1421	17.2759	18.2213	21.5141	19.4093	19.4218	13.1401	17.5056	12.6906
cra_locus_101613_iso_1_len_324_ver_3	Gene of unknown function	0	0	0	0	0	0	0	0	0	0	0	0	0	0	0	0	0	0	0	0	0	0	0
cra_locus_10161_iso_5_len_2233_ver_3	Zinc finger family protein	18.1904	21.5536	22.706	21.5317	19.68	20.9502	20.2625	21.8909	17.9244	20.2549	25.9387	20.4696	15.3081	26.0357	30.8299	21.4378	19.1588	22.8296	20.0868	21.7952	18.3649	21.7984	20.8223
cra_locus_10162_iso_4_len_1435_ver_3	Protein transporter	52.45	33.2656	29.9317	24.6168	66.2348	75.6957	74.7047	27.0809	20.424	22.0762	31.0491	26.2474	51.263	60.912	94.5978	77.4785	82.5175	100.832	88.1955	62.1608	69.7469	62.9271	62.2188
cra_locus_101634_iso_1_len_313_ver_3	Cellulose synthase	0	0	0	0	0	0	0	0	0	0	0	0	4.98111	0	0	0	0	0	0	0	0	0	0
cra_locus_10163_iso_1_len_2965_ver_3	Homeodomain	6.89209	16.1799	18.7188	18.9403	10.0224	10.2193	9.18568	14.0688	19.6462	19.08	15.2062	17.0316	8.35965	9.47133	12.3864	6.64443	6.51214	9.14787	10.8971	11.6425	9.4523	7.03704	7.48787
cra_locus_101645_iso_1_len_385_ver_3	Metallothionein type 3	0	0	0	0	0	0	0	0	0	0	0	0	100.932	0	0	0	0	0	0	0	0	0	0
cra_locus_10164_iso_1_len_1269_ver_3	Gene of unknown function	1.87611	1.13243	1.22791	1.51959	1.39263	0.942087	1.30964	1.10853	0.568675	1.3462	1.28377	1.63651	1.4545	0.98583	2.61403	1.27488	2.85409	2.81029	2.41686	1.56628	1.9018	1.35527	1.47745
cra_locus_101658_iso_1_len_1116_ver_3	Stachyose synthase	0	12.4702	9.2332	8.91549	8.55504	10.0116	1.7074	13.7837	9.92574	10.5801	8.78725	9.25142	0	0	0	0	0	0	0	0	0	0	0
cra_locus_10165_iso_1_len_1946_ver_3	Conserved gene of unknown function	8.80577	4.90513	3.79124	4.45354	3.08384	2.79034	1.69426	5.27027	11.776	7.12813	2.50978	1.87695	0.77484	2.23588	7.43514	4.63693	7.38481	1.01975	6.44222	6.82178	5.09262	7.47732	5.35179
cra_locus_10166_iso_1_len_1843_ver_3	RNA-directed DNA polymerase (Reverse transcriptase)	2.02818	1.683	2.06049	2.03521	0.842198	0.677879	0.351698	1.70496	1.18956	1.80653	0.897097	2.13611	0.935812	2.30336	3.38134	2.5981	0.941877	1.87418	0.875885	0	0	0.708445	0
cra_locus_10167_iso_2_len_1501_ver_3	Pectate lyase	2.05833	0	0	0	2.03062	1.42014	0.748618	0	0	0	0	0	7.35188	9.55386	0	2.55328	0	0	0	0	0	0	0
cra_locus_10168_iso_2_len_2667_ver_3	Sec23/sec24 transport family protein	16.4693	26.3402	23.4047	24.3162	19.3883	19.5778	24.4481	29.2839	25.924	20.8603	21.0813	20.8441	11.7439	16.3184	21.9623	17.0515	20.8798	28.4495	20.9708	23.8048	16.3415	24.2454	16.5286
cra_locus_101697_iso_1_len_482_ver_3	Gene of unknown function	2.14986	1.48268	2.13916	1.86766	2.49272	2.30733	2.0485	0	0	0	2.34283	4.27693	2.49825	2.4158	2.14919	3.02897	2.69405	0	2.39141	0	0	0	2.62875
cra_locus_10169_iso_1_len_2006_ver_3	White-brown-complex ABC transporter family	3.61245	0	0	0	0	0	0.586729	0	0	0	0.393672	0	0	0	0	0	0	0	0	0	0	0	0
cra_locus_1016_iso_2_len_2634_ver_3	Glycine-rich protein	26.1073	50.1835	45.8348	57.0727	29.0939	30.0455	32.9733	38.2295	36.3519	40.2316	55.4078	48.6974	20.8258	22.9152	43.8068	31.7411	32.9501	33.9977	30.524	39.614	38.3183	37.3791	41.5636
cra_locus_10170_iso_5_len_1794_ver_3	RNA Binding Protein 45	263.994	282.429	343.497	396.073	327.829	285.82	318.908	299.369	286.507	313.218	297.486	355.186	303.726	335.568	494.998	404.151	233.801	398.1	189.492	230.347	201.111	257.248	246.468
cra_locus_101715_iso_1_len_276_ver_3	Gene of unknown function	0	6.18009	7.28602	7.7848	0	0	0	4.73031	3.3601	7.00917	7.1613	9.71153	8.30454	2.68334	2.57443	0	0	0	0	0	0	0	4.82114
cra_locus_10171_iso_1_len_1965_ver_3	SRO3 (SIMILAR TO RCD ONE 3); NAD+ ADP-ribosyltransferase	7.15434	2.80696	4.7551	5.00575	3.1565	3.65218	5.33248	4.43754	10.7601	19.0667	8.07673	6.24277	3.36122	3.08262	3.51967	1.60237	3.53009	4.21459	2.35016	3.41086	4.36273	31.0455	4.06908
cra_locus_101726_iso_1_len_293_ver_3	UDP-glucose:glucosyltransferase	0	0	0	0	0	0	0	0	0	0	0	0	0	0	0	0	0	0	0	0	0	0	0
cra_locus_10172_iso_2_len_2554_ver_3	Conserved gene of unknown function	13.0923	7.15784	7.56591	8.1026	8.10238	9.42343	8.72844	11.1871	10.9783	17.1412	11.1805	7.59999	5.82662	6.09856	12.1141	7.60782	21.1698	28.5109	22.5672	20.7166	16.2908	16.5216	16.3976
cra_locus_10173_iso_1_len_4660_ver_3	DNA binding protein	31.895	39.8579	49.6672	45.1501	23.9963	24.8006	21.754	38.7647	24.212	29.3466	48.1418	51.7578	21.8717	27.0804	31.0183	21.816	30.3586	25.713	34.5274	28.2806	27.5235	29.1806	28.9976
cra_locus_10174_iso_7_len_1933_ver_3	Reverse transcriptase	7.53033	4.84241	3.74441	5.73622	22.0133	13.5949	29.9434	2.77947	4.66408	4.70876	3.86469	6.10541	22.5866	36.019	10.2299	15.4471	20.6819	4.99966	16.5	25.0933	6.16439	23.5716	8.65982
cra_locus_10175_iso_1_len_2588_ver_3	Glutamate/malate translocator	19.2401	5.60724	4.49005	3.96742	26.0348	28.1349	59.0181	6.5264	16.4432	10.7521	2.29486	3.24477	26.6177	45.1938	23.1961	25.3178	17.1686	16.2748	13.6596	19.3788	15.6029	21.4013	15.4638
cra_locus_10176_iso_3_len_951_ver_3	Gene of unknown function	42.5444	14.1721	14.1137	9.92705	63.542	60.6167	35.1638	46.2912	41.2272	27.6294	14.7339	13.0084	25.086	69.398	63.6167	42.7697	71.124	67.5713	51.5414	28.2269	9.87461	35.3821	11.8228
cra_locus_10177_iso_1_len_3932_ver_3	Condensin complex components subunit	0.901052	2.19019	1.87984	1.34003	15.9805	12.1928	21.3685	3.59227	3.55113	5.29119	1.8128	2.17471	3.44326	19.144	2.70255	7.64253	9.13035	3.0705	13.0822	14.6298	1.79868	14.133	3.5439
cra_locus_10178_iso_2_len_1368_ver_3	Short chain alcohol dehydrogenase	15.9607	26.7676	23.2102	28.0888	19.7932	16.7599	12.5612	22.3278	30.1235	28.2603	22.9328	29.5589	11.4101	9.57338	14.3929	15.9948	18.7147	23.9939	14.8325	24.2712	20.8897	22.3698	18.4024
cra_locus_10179_iso_4_len_2183_ver_3	PERK1 kinase	9.84635	10.9986	10.1866	7.39144	13.3218	15.8419	12.4801	15.9537	22.0779	18.6871	9.09877	7.0244	9.6542	13.6481	11.5436	15.6484	12.4647	16.5332	11.735	12.3227	11.0506	11.1981	9.95116
cra_locus_1017_iso_5_len_4065_ver_3	Ubiquitin carboxyl-terminal hydrolase	95.7691	107.777	87.8248	102.374	61.3548	68.5216	63.9044	103.417	111.619	119.954	83.0426	90.3394	60.7775	75.4454	97.173	84.1504	82.3681	65.2829	87.5559	72.118	65.7714	70.6389	59.5774
cra_locus_10180_iso_5_len_3089_ver_3	Guanosine-3',5'-bis(Diphosphate) 3'-pyrophosphohydrolase	25.7793	12.1719	12.916	13.8998	21.8808	14.8083	11.5807	7.03009	9.30298	6.58721	7.19097	9.94956	52.5866	39.8194	10.8455	18.9111	10.3163	9.47157	8.77977	6.60088	6.91845	6.49344	6.79529
cra_locus_10181_iso_5_len_2507_ver_3	Glu-tRNA(Gln) amidotransferase subunit A	29.6943	30.1354	25.4746	25.2655	37.2863	33.8185	33.5163	31.6462	15.7415	20.5853	22.728	24.6472	49.4381	47.7244	36.346	32.5974	23.6069	31.4183	26.8423	22.8338	19.4328	20.0663	21.2924
cra_locus_101824_iso_1_len_327_ver_3	Chloroplast methionine sulfoxide reductase B1	0	0	0	0	0	0	0	0	0	0	0	0	0	0	0	0	0	0	0	0	0	0	0
cra_locus_10182_iso_3_len_1089_ver_3	AP2/EREBP transcription factor	91.6207	270.562	244.937	182.779	53.6403	66.9939	33.2122	253.194	107.815	141.453	254.713	303.281	2.20203	6.82195	31.1908	18.9103	43.3665	159.164	58.526	69.2589	41.7035	54.79	37.8072
cra_locus_10183_iso_3_len_2750_ver_3	Serine-threonine protein kinase	12.7954	2.84988	2.21312	2.61464	5.49259	5.64899	6.9167	2.55112	3.50767	3.24947	1.40415	1.49189	4.4711	3.52657	6.71474	7.32291	5.02949	5.59131	5.06951	5.47227	4.79724	5.55857	5.31902
cra_locus_10184_iso_1_len_1669_ver_3	DNA binding protein	13.6911	4.95176	4.05174	4.59607	7.49293	7.53549	9.8314	5.11274	2.12547	2.48832	4.2711	3.99416	8.53957	10.1939	8.93728	10.6583	9.92198	11.7644	7.39821	12.0794	10.501	14.6475	12.3439
cra_locus_10185_iso_2_len_907_ver_3	Adenine phosphoribosyltransferase	2.03355	1.18224	0	1.31402	4.00964	3.01116	3.63314	2.1918	2.26864	2.60563	0	1.78635	0	5.64074	1.49217	2.10636	8.89588	3.38815	6.25145	10.1754	0	15.988	1.46062
cra_locus_101863_iso_1_len_309_ver_3	Conserved gene of unknown function	0	0	0	0	0	0	0	0	0	0	0	0	20.2091	0	0	0	0	0	0	0	0	0	0
cra_locus_10186_iso_1_len_1563_ver_3	RNA binding protein	2.57474	5.77157	4.42196	3.76045	5.62913	6.49305	4.42359	9.76718	9.7927	10.5604	4.33562	4.3303	1.75216	3.53917	3.85238	4.47238	5.40987	3.82307	6.54412	9.70668	7.22219	6.89538	6.09085
cra_locus_101879_iso_1_len_324_ver_3	Xyloglucan endotransglucosylase-hydrolase XTH5	0	0	0	0	0	0	0	0	0	0	0	0	4.79538	0	0	0	0	0	0	0	0	0	0
cra_locus_10187_iso_1_len_1694_ver_3	DNAJ heat shock N-terminal domain-containing protein	41.5615	1.61358	2.49431	4.43467	90.2805	44.6818	1.53269	2.31159	7.47698	3.49075	1.35983	1.27446	155.228	88.8968	4.3331	9.63838	0.58638	6.32989	0	0	0	0.949961	0
cra_locus_10189_iso_3_len_1971_ver_3	Plant-specific domain TIGR01615 family protein	21.7032	36.0633	48.4377	55.4477	15.1181	12.8223	17.3815	20.7743	23.5051	27.3495	123.728	94.6349	9.61545	8.9119	11.9298	8.35575	19.146	18.0317	16.1028	12.6678	16.7757	10.588	14.4336
cra_locus_1018_iso_1_len_1687_ver_3	F-box family protein	6.13491	6.37108	5.59415	6.12342	5.8892	6.37827	8.08057	6.09355	8.35952	6.30243	5.761	3.83951	3.58352	4.02663	6.54431	3.5262	3.23871	4.81873	6.05469	5.07607	8.20371	5.60458	9.17122
cra_locus_10190_iso_5_len_1905_ver_3	Bidirectional sugar transporter SWEET17	8.42142	115.869	116.37	127.506	45.6044	47.227	3.52441	484.141	2379.41	1569.77	282.75	105.98	1.88518	2.71871	52.5205	78.0383	26.325	67.7778	39.8446	42.8605	16.8981	21.1306	20.8985
cra_locus_10192_iso_7_len_4055_ver_3	Pentatricopeptide repeat-containing protein	9.35342	20.7171	13.4446	16.0667	7.6059	7.88016	9.86805	10.8402	12.142	9.82905	11.4408	16.0412	8.01135	9.4474	6.70465	9.83921	7.47722	4.79227	6.96016	4.88842	5.23119	5.30371	7.30356
cra_locus_10193_iso_1_len_3074_ver_3	Conserved gene of unknown function	4.93961	25.2057	11.0247	8.25971	17.1458	15.0832	6.68551	53.0418	10.5753	6.43691	1.90535	5.18108	8.06041	3.93394	25.2446	17.7503	56.6716	36.454	68.7816	40.7784	5.51159	37.3995	7.28
cra_locus_101951_iso_1_len_303_ver_3	Gene of unknown function	7.30611	0	0	0	0	2.69271	0	0	0	0	0	0	0	0	2.52658	0	3.56322	4.03257	3.69011	0	0	0	0
cra_locus_10195_iso_5_len_2220_ver_3	Methyl binding domain protein	13.4582	29.819	36.2671	25.1699	16.7954	31.9906	22.0769	32.843	34.2054	30.5627	37.1045	26.0651	7.19908	17.972	13.4987	11.5449	23.877	25.0987	17.6349	20.979	32.6421	24.0032	29.2657
cra_locus_10196_iso_4_len_3492_ver_3	Topbp1	15.733	18.3548	13.1718	15.8803	9.9933	10.4041	9.57984	21.3549	26.6023	32.817	13.546	15.6119	5.78028	8.51301	11.2358	8.61358	13.0862	11.3882	13.2012	12.7871	8.80573	10.4479	9.91933
cra_locus_101972_iso_1_len_487_ver_3	Zinc finger, CCHC-type	0	6.26591	13.9039	9.40431	1.4503	1.87941	15.5759	7.05294	9.42295	7.69511	6.33384	6.44608	0	1.19457	5.37618	0	0	43.425	3.6268	3.95787	3.11351	2.37425	2.60005
cra_locus_10197_iso_1_len_1065_ver_3	Conserved gene of unknown function	13.8918	13.6146	8.15105	9.05742	14.426	15.4302	26.6478	10.1501	10.8149	15.4577	12.0199	9.974	10.9238	9.86753	10.9869	16.2389	9.65956	10.3371	9.34128	15.8724	24.3524	20.0382	19.2753
cra_locus_10198_iso_4_len_1484_ver_3	Endopeptidase	6.28433	3.7349	4.42419	4.12321	7.8065	5.9582	4.98266	4.06231	6.10337	4.54701	4.5224	3.6777	15.702	16.2715	4.57005	4.26419	3.85832	4.32273	3.37526	2.75865	2.03551	2.03825	1.82574
cra_locus_101996_iso_2_len_346_ver_3	Gene of unknown function	6.31506	11.1717	14.1928	13.3447	5.44801	6.01259	5.85471	17.9952	21.7304	20.0902	15.4006	13.0968	8.47889	11.6206	16.1562	9.59791	7.44305	10.1886	7.29041	0	0	4.054	0
cra_locus_101999_iso_1_len_586_ver_3	FAR1; Polynucleotidyl transferase, Ribonuclease H fold	0	0	0	0	0	0	0	0	0	0	0	0	0	0	0	0	0	0	0	0	0	0	0
cra_locus_10199_iso_4_len_1613_ver_3	WD-repeat protein	12.0233	52.9257	46.6254	44.0409	17.1092	17.3505	19.589	70.2473	35.8909	44.9679	64.4555	54.5752	9.28802	14.9079	16.177	14.6884	12.8923	12.073	13.359	12.5065	8.24071	14.2916	9.36835
cra_locus_1019_iso_5_len_2921_ver_3	DNA binding protein	51.5791	17.6295	20.6311	24.7071	26.5282	20.1544	23.2233	10.5042	33.9784	31.8134	23.0218	24.0857	29.8874	30.9276	33.6058	23.3308	26.1073	37.4127	29.9671	32.0115	17.6371	26.628	17.2941
cra_locus_101_iso_5_len_2048_ver_3	Ubiquitin-specific protease 24	29.0488	35.5952	31.6774	39.2379	34.0508	29.7825	47.1397	28.7986	37.3249	35.3101	24.3905	29.2909	23.262	22.9998	27.6157	35.3986	23.05	22.8588	20.6038	31.6162	32.7608	32.1684	32.7116
cra_locus_10200_iso_1_len_2096_ver_3	Exostosin family protein	2.80078	3.33802	2.98032	3.75825	4.1776	3.62893	5.94853	3.09229	4.13567	3.91865	2.08804	2.27636	3.28508	5.22244	5.24624	3.80978	5.07763	3.783	3.31929	4.4475	2.75953	4.78255	2.79192
cra_locus_10201_iso_3_len_3695_ver_3	UBP26 (UBIQUITIN-SPECIFIC PROTEASE 26)	26.7424	40.2232	32.324	38.6038	18.0645	17.5092	17.8614	35.4517	44.0781	47.343	24.2021	31.7347	18.4837	15.5794	20.1735	27.2251	17.2219	18.733	21.5913	21.3326	19.7181	19.8735	19.6646
cra_locus_10202_iso_6_len_2285_ver_3	Conserved gene of unknown function	43.8881	10.2307	14.0214	12.7849	23.2307	22.3205	24.8858	10.1448	22.6616	15.8962	9.06374	10.919	13.3876	16.6116	23.1733	25.968	28.3462	36.7328	19.7839	26.86	23.5817	25.8093	21.9259
cra_locus_102033_iso_1_len_372_ver_3	Hexose transporter	0	0	0	0	0	0	0	0	0	0	0	0	0	0	0	0	0	0	0	0	0	0	0
cra_locus_10204_iso_2_len_1472_ver_3	Gene of unknown function	5.15546	12.0172	11.728	12.6324	11.2316	8.074	8.3601	11.1927	13.3435	10.8408	4.71719	9.81409	6.61732	8.5047	11.934	8.80601	10.7127	12.1925	12.0721	14.2219	7.37358	14.3179	5.84016
cra_locus_10205_iso_4_len_2592_ver_3	Conserved gene of unknown function	1.75212	5.05055	5.18521	6.84212	1.52907	1.15147	2.30816	3.62012	5.37537	5.40387	5.88003	6.22743	3.20128	2.72897	2.28055	2.51386	2.12686	1.55861	1.71887	1.51555	1.06995	1.50424	1.6083
cra_locus_10206_iso_5_len_1641_ver_3	Transcription factor	0.738402	0	0	0	12.0733	7.66638	11.8371	0	0	0	0	0	15.7962	37.4117	0	3.40478	0	0	0	0	0	0	0
cra_locus_10207_iso_3_len_3705_ver_3	CFM2	18.1772	15.2316	18.0763	14.73	33.2842	30.4575	26.3485	17.2383	11.6499	13.0188	15.5712	14.8328	27.1113	33.9631	10.769	15.2552	12.66	12.2543	14.9903	10.7077	9.57861	12.4779	10.6154
cra_locus_102086_iso_1_len_455_ver_3	Replication factor C / DNA polymerase III gamma-tau subunit	0	15.6231	12.0236	11.7357	0	0	0	10.4868	10.7153	10.3051	11.1279	12.9943	0	0	0	0	0	0	0	0	0	0	0
cra_locus_10209_iso_3_len_2389_ver_3	Galacturonosyltransferase 7	18.203	8.43446	9.23873	9.38609	19.4487	17.6896	27.8441	9.17353	10.726	9.35323	8.21461	7.66223	21.8789	28.8838	22.0778	26.4162	16.996	11.4166	17.3819	23.6463	14.2227	24.0855	13.6238
cra_locus_1020_iso_2_len_2660_ver_3	Cytochrome P450-type monooxygenase 97A29	16.7187	9.23647	8.39235	6.98671	46.6052	31.7116	17.6572	12.7478	10.8514	13.4425	7.82559	6.27687	58.9565	50.9403	6.8586	17.4596	7.26707	4.87804	5.87428	5.16734	3.58551	3.68218	2.47196
cra_locus_10210_iso_4_len_2064_ver_3	C2 domain-containing protein	99.3825	96.7047	52.2105	52.7247	113.981	110.157	76.8369	125.265	41.64	35.7313	18.1143	33.1409	97.1129	72.1075	184.867	131.1	123.02	220.901	198.03	286.062	155.778	166.281	138.1
cra_locus_10211_iso_3_len_664_ver_3	DNAJ protein	23.0904	38.0779	31.502	31.8556	44.6661	36.8902	40.2791	48.3806	39.0793	34.1774	31.867	27.0241	23.9486	21.9033	27.7793	31.7548	37.6691	43.5009	33.4376	37.9261	53.032	38.4524	47.027
cra_locus_102128_iso_1_len_278_ver_3	Gene of unknown function	0	0	0	0	0	0	0	0	0	0	0	0	0	0	0	0	0	0	0	0	0	0	0
cra_locus_10212_iso_2_len_1783_ver_3	MRNA, clone: RTFL01-10-D15	15.7162	3.79445	4.02517	4.69201	12.4213	15.3884	10.3167	2.74288	3.69075	3.48989	0.968122	2.99817	10.4041	9.2201	13.2445	13.9791	30.1042	15.3125	35.4104	33.883	18.0109	42.8899	17.8608
cra_locus_102134_iso_1_len_357_ver_3	Gene of unknown function	11.8766	2.79234	0	0	4.45525	5.06115	0	67.0524	0	0	2.58855	2.81279	0	2.17796	15.0799	5.09272	0	3.10954	0	0	0	0	0
cra_locus_10213_iso_5_len_2928_ver_3	General negative transcription regulator	12.1498	10.9102	10.7204	10.9043	21.7441	15.9913	18.8059	9.08005	17.1772	15.0365	12.496	9.61103	29.4736	35.1722	18.279	27.1845	15.997	9.29394	13.7765	14.2029	8.96754	17.2886	12.6075
cra_locus_102141_iso_1_len_295_ver_3	Gene of unknown function	0	0	0	0	0	0	2.61646	0	0	0	0	0	0	0	2.60402	0	0	0	0	0	0	0	0
cra_locus_10214_iso_2_len_1442_ver_3	Ankyrin repeat-containing protein	14.627	3.62985	6.956	4.89897	20.637	7.57123	1.92917	9.19301	11.4536	16.6283	3.80557	7.11698	8.25955	6.30305	14.2398	4.17983	29.9415	26.6471	36.187	18.6933	11.4893	18.12	6.35312
cra_locus_10215_iso_3_len_2750_ver_3	Stachyose synthase	26.7732	3.91533	4.37457	3.0663	40.1929	46.3206	38.9848	6.23852	42.4718	23.8819	8.91847	4.45826	12.7113	35.4744	25.5965	41.5689	18.0297	7.51194	16.2699	27.932	4.45444	41.5618	35.1623
cra_locus_102160_iso_1_len_339_ver_3	Gene of unknown function	2.44344	4.13627	2.67937	5.70651	0	2.18168	2.43218	0	3.74814	1.99455	0	0	4.10701	0	3.71393	2.11688	2.88698	0	7.22207	0	0	0	0
cra_locus_102166_iso_1_len_387_ver_3	Glyceraldehyde-3-phosphate dehydrogenase B, chloroplastic	0	0	0	0	0	0	0	0	0	0	0	0	29.4387	0	0	0	0	0	0	0	0	0	0
cra_locus_102169_iso_1_len_276_ver_3	Gene of unknown function	6.79047	17.3042	21.2976	16.1924	4.03383	5.72519	5.40064	27.5471	31.5849	23.7811	13.7497	20.9171	3.43636	5.14306	18.7231	14.9748	13.5051	11.6996	21.9294	18.8714	7.99371	15.6087	5.93371
cra_locus_10216_iso_6_len_1667_ver_3	Class III chitinase	9.31473	19.9058	13.2265	10.5651	42.9038	36.1094	8.42709	19.5528	8.05624	6.68136	7.04081	8.2797	4.79318	4.83811	12.694	58.31	20.8616	17.6941	37.2126	29.3264	7.83511	15.5706	3.1876
cra_locus_10217_iso_6_len_6929_ver_3	Agenet domain containing protein	63.4435	42.9804	35.4261	37.7546	48.5086	53.4282	43.7129	44.7881	47.5293	53.7031	39.8937	39.2369	51.342	57.3121	57.0481	58.0062	58.2433	56.558	61.466	44.7921	43.0261	45.8603	46.3915
cra_locus_10218_iso_1_len_1160_ver_3	Retroelement pol polyprotein	3.01379	0	0	0	2.64286	2.88119	0.769207	0	0	0	0	0	2.56411	1.92234	6.74015	21.8903	0	1.80359	0	0	0	0	0
cra_locus_102196_iso_1_len_328_ver_3	Cinnamoyl-CoA reductase	0	0	0	0	0	0	0	0	0	0	0	0	0	0	0	0	0	0	0	0	0	0	0
cra_locus_10219_iso_6_len_1574_ver_3	Coiled-coil domain-containing protein	36.7702	42.6032	85.1214	81.4938	30.7828	35.2984	24.6258	26.2904	26.0533	30.1351	74.6462	77.928	40.3332	37.423	45.0157	34.0184	31.0169	40.8192	33.8432	28.6613	28.3281	31.1602	30.771
cra_locus_1021_iso_2_len_2879_ver_3	UDP-n-acetylmuramoylalanyl-d-glutamate--2, 6-diaminopimelate ligase	10.0236	11.9548	16.2721	14.7621	21.6285	18.2725	23.0568	11.72	9.78461	6.83394	6.55402	10.6827	19.3582	38.7072	9.91403	9.50336	6.22334	7.54509	6.38583	6.90553	4.5801	6.7291	3.3748
cra_locus_102200_iso_1_len_359_ver_3	Small rubber particle protein	0	0	0	0	0	0	0	0	0	0	0	0	6.6445	0	0	0	0	0	0	0	0	0	0
cra_locus_102203_iso_1_len_293_ver_3	Conserved gene of unknown function	0	0	0	0	0	0	0	0	0	0	0	0	0	0	0	0	0	0	0	0	0	0	0
cra_locus_10220_iso_3_len_2637_ver_3	Protein kinase	38.3795	17.4422	12.3678	13.4186	25.9277	31.3076	43.2985	43.6406	29.2772	39.1422	20.1572	14.6101	27.5279	33.512	21.084	37.1488	31.4148	17.957	26.4181	32.469	32.6383	36.3506	30.5573
cra_locus_10221_iso_1_len_1261_ver_3	14-3-3 protein Lil 1433-3	19.4988	1.73464	1.91021	1.62318	0	0	1.12984	6.77796	18.7277	11.8944	1.60804	1.0484	0	0	0	0	0	0	0	0	0	1.12336	0
cra_locus_10222_iso_3_len_3486_ver_3	Protein kinase family protein	34.3847	85.5218	77.9469	106.527	31.204	28.4742	32.4971	59.3249	69.3341	77.4809	87.2498	95.382	28.4605	24.3137	33.208	41.8224	37.3734	34.0763	41.0929	39.4766	33.285	32.4847	28.1138
cra_locus_102235_iso_1_len_326_ver_3	Thioredoxin x	0	0	0	0	0	0	0	0	0	0	0	0	6.90647	0	0	0	0	0	0	0	0	0	0
cra_locus_10223_iso_2_len_1283_ver_3	BHLH domain class transcription factor	12.728	29.1663	21.4165	28.582	28.9743	30.7908	27.9353	18.0865	28.7238	26.182	10.8331	18.3195	10.4349	7.75532	110.599	54.4721	66.0484	63.4406	74.6971	107.692	80.5629	153.092	97.6646
cra_locus_102247_iso_1_len_328_ver_3	Defensin	0	0	0	0	15.995	30.8446	29.484	0	0	0	0	0	0	0	3.27495	0	11.9727	5.1167	26.811	22.9511	0	20.4984	0
cra_locus_10224_iso_1_len_2878_ver_3	GRAS family transcription factor	19.5035	5.1865	4.1059	3.91453	16.3203	18.1494	15.0238	5.52435	3.37921	3.10348	5.41393	3.10878	22.0463	19.0084	11.0327	24.6462	15.3639	9.69572	11.458	18.4515	10.0875	23.6642	14.0505
cra_locus_102254_iso_1_len_320_ver_3	POM30	0	0	0	0	0	0	0	0	0	0	0	0	0	0	0	0	0	0	0	0	0	0	0
cra_locus_10225_iso_1_len_978_ver_3	Plant-specific domain TIGR01570 family protein	20.3534	0.96511	2.33398	2.10723	5.87945	4.14642	3.54467	1.01391	2.27382	2.21523	3.87691	2.43044	16.3973	13.9298	1.01995	6.85214	0	1.25387	0	0	0	0	0.965244
cra_locus_10226_iso_1_len_348_ver_3	Gene of unknown function	3.56175	0	0	0	6.6632	4.62573	6.54525	0	0	0	0	0	4.65633	7.58285	3.24673	7.66759	10.9671	0	16.3006	8.92957	0	12.3957	0
cra_locus_10227_iso_2_len_1837_ver_3	Conserved gene of unknown function	3.89027	5.03199	2.22046	1.57401	7.67841	7.34539	7.82719	4.29554	5.78391	4.34321	1.56535	2.8576	13.5752	17.0175	2.04184	5.6424	5.26501	1.22226	5.03308	5.65753	1.75943	6.67055	2.78656
cra_locus_10229_iso_5_len_2472_ver_3	Early-responsive to dehydration protein	39.3549	46.2131	46.5509	62.7463	31.866	31.6352	34.4001	40.9052	65.8384	54.8455	62.0651	47.7725	57.1529	33.9599	29.5267	40.0973	13.721	17.8129	14.9585	14.469	19.9357	13.5152	20.6976
cra_locus_1022_iso_2_len_2167_ver_3	PRLI-interacting factor A	231.892	35.0561	59.0831	36.7299	68.7689	93.1018	45.6412	57.6058	46.3687	70.1159	54.8187	57.3486	44.3312	74.0417	114.655	56.5183	111.118	170.485	111.201	86.9951	100.84	97.9991	112.38
cra_locus_102300_iso_1_len_442_ver_3	Conserved gene of unknown function	4.97816	13.3059	12.0669	10.6152	5.4683	4.46612	3.22992	11.4825	13.263	16.9174	20.3866	20.5518	3.42527	4.5095	6.80204	3.17789	9.25891	5.14492	9.61776	0	0	0	2.21796
cra_locus_10230_iso_3_len_2733_ver_3	Stachyose synthase	1.16053	9.50664	25.5469	25.0311	25.1546	15.4619	18.7036	1.88089	2.08714	3.10984	5.25942	17.9811	21.3451	15.0773	15.5915	2.27246	0.541599	2.16886	2.08329	3.59131	19.553	1.09677	34.3167
cra_locus_102315_iso_1_len_283_ver_3	Gene of unknown function	0	4.56743	11.4454	5.7534	0	0	0	8.92931	6.20825	8.52001	12.5351	15.6187	0	0	0	0	0	0	0	0	0	0	0
cra_locus_102316_iso_1_len_486_ver_3	Gene of unknown function	0	22.9807	35.2901	87.6851	0	0	0	5.41407	7.6275	1.89416	18.4238	37.7517	0	0	0	0	0	0	0	0	0	0	0
cra_locus_10231_iso_3_len_3347_ver_3	MdTCP2A protein	39.649	0.441658	0.667555	0.788146	42.3206	35.0594	32.3989	0.248567	0	0	0.857353	1.32074	84.9293	112.801	31.4728	13.9884	23.5645	22.3425	10.709	7.60951	3.40513	17.6378	6.73623
cra_locus_10232_iso_8_len_3306_ver_3	Run and tbc1 domain containing 3, plant	13.456	24.0175	24.734	22.2034	11.5943	10.1128	9.23865	28.9638	28.3149	34.6042	21.5046	23.7335	9.97195	11.7258	12.8784	9.83067	13.3324	20.1787	9.91739	9.68028	6.62768	10.5582	8.97288
cra_locus_10233_iso_1_len_1456_ver_3	Somatic embryogenesis receptor kinase	23.8485	0	0	0	0	0	0	0	0	0	0	0	0	0	0	0	0	0	0	0	0	0	0
cra_locus_10234_iso_1_len_2183_ver_3	Fructan 1-exohydrolase I	18.0098	0.793714	1.2211	0.964101	20.476	24.034	24.7313	0.654065	0.809138	1.1195	0.722646	0.728139	9.42434	13.2704	2.37197	4.76375	28.6309	27.779	32.5563	27.3504	29.3835	29.0049	21.3269
cra_locus_10235_iso_6_len_4677_ver_3	RNA-dependent RNA polymerase 6	18.4152	20.5195	15.3386	17.9543	31.0111	34.4721	25.3056	24.0728	22.1771	23.2531	10.3056	12.8226	20.1787	25.5943	32.4235	37.44	27.8669	21.1388	27.9529	27.049	19.5642	26.3515	24.4376
cra_locus_10236_iso_2_len_1742_ver_3	Serine/threonine-protein kinase OXI1	25.1731	5.09718	6.14186	4.89411	9.22876	18.8794	8.73528	8.18485	15.94	19.2026	4.83256	6.62459	7.59758	6.7484	16.8785	14.1047	28.7349	47.1859	33.8969	28.7227	104.761	10.503	77.8587
cra_locus_10238_iso_9_len_1325_ver_3	Pollen preferential protein	36.2785	6.40745	8.17147	6.23144	22.3463	10.1998	4.65418	9.22746	10.8226	9.39868	10.9734	16.302	8.95063	11.9461	51.8116	63.9386	20.2145	14.9527	17.4422	12.2885	5.58614	16.0945	9.54184
cra_locus_102390_iso_1_len_326_ver_3	WRKY transcription factor 11	0	0	0	0	0	0	0	0	0	0	0	0	0	0	0	0	0	0	0	0	0	0	0
cra_locus_102393_iso_1_len_441_ver_3	Phi class glutathione transferase GSTF2	0	0	0	0	0	0	0	0	0	0	0	0	2.57519	0	0	0	0	0	0	0	0	0	0
cra_locus_1023_iso_1_len_2197_ver_3	Formin 3	25.7297	11.2092	12.0683	11.8138	31.6187	25.8072	26.2972	17.0395	19.2939	17.1974	10.5739	10.9792	18.0418	27.0945	16.2345	17.8863	17.0376	13.447	16.6561	16.2446	8.2977	19.4701	11.6192
cra_locus_10240_iso_1_len_1442_ver_3	Geranyl geranyl pyrophosphate synthase	23.7402	16.464	13.6671	9.79794	57.6801	53.7383	61.405	25.7307	28.1347	22.5357	8.16195	10.7081	60.6201	82.6698	16.6533	25.2901	13.3585	19.3688	14.3624	9.7132	7.29724	13.5725	5.64002
cra_locus_10241_iso_1_len_2610_ver_3	Avr9/Cf-9 rapidly elicited protein 276	19.8726	9.69946	12.1485	8.9698	10.9377	12.816	9.75251	12.8883	16.2388	15.859	15.5981	11.3314	12.6062	11.5958	26.23	12.0887	15.4461	19.001	12.6197	18.3106	18.1048	29.1472	19.2005
cra_locus_10242_iso_2_len_1964_ver_3	Nitrate transporter	7.41703	8.99323	2.11785	1.78869	10.7172	71.0795	21.7006	32.8339	3.6205	17.8049	14.2679	1.76414	0.402093	0.953303	16.9912	0.554955	88.6602	221.021	32.996	29.4087	138.659	24.2923	116.029
cra_locus_102431_iso_1_len_291_ver_3	Gene of unknown function	2.27157	13.5169	17.4364	49.3188	0	0	0	19.9366	5.38514	20.0596	14.3128	32.3965	0	0	7.93364	0	0	0	0	0	0	0	0
cra_locus_10243_iso_1_len_1273_ver_3	Conserved gene of unknown function	92.7261	106.461	141.161	172.932	137.333	96.4265	24.943	60.4967	36.3601	36.0846	111.306	170.65	401.591	276.335	79.3564	91.2129	19.3071	39.1431	30.7112	24.2512	20.3688	22.8067	18.3351
cra_locus_10244_iso_1_len_1767_ver_3	Sugar binding protein	1.08957	37.3101	47.2732	59.5662	5.38881	2.83009	1.86876	22.1055	28.6995	38.0662	91.882	68.3188	4.27321	5.33958	15.7526	14.451	3.08963	2.15175	4.36316	3.05445	0	2.55955	1.0541
cra_locus_102453_iso_1_len_404_ver_3	Gene of unknown function	6.49257	21.6557	23.0724	21.741	5.13677	6.23034	4.02121	33.3563	21.2466	29.1842	23.2072	26.5707	6.79025	8.04397	20.3588	7.15892	3.90529	14.279	7.12577	4.14332	5.5577	0	4.88542
cra_locus_10245_iso_3_len_2078_ver_3	Chromatin remodelling complex ATPase chain isw-1	15.1567	24.7038	26.8221	31.4187	14.0368	14.2231	13.3319	17.0396	20.3334	19.7654	19.7516	24.3144	13.6355	15.6729	17.2074	21.167	15.8035	15.3064	15.5086	14.9763	15.739	16.5	15.9152
cra_locus_102462_iso_1_len_463_ver_3	Something about silencing protein sas10	0	0	0	0	0	0	0	0	0	0	0	0	0	0	0	0	0	0	0	0	0	0	0
cra_locus_10247_iso_1_len_888_ver_3	Gene of unknown function	0	1.5638	1.531	1.70124	2.08783	1.64624	2.36314	6.48082	8.40573	5.75841	2.55339	1.18144	0	1.33067	1.12744	1.31955	3.40974	4.05676	3.36301	3.01464	1.53236	3.22229	1.91948
cra_locus_102484_iso_1_len_253_ver_3	Gene of unknown function	0	0	0	0	4.74456	3.29376	0	0	0	0	0	0	43.8916	35.0876	0	0	0	0	0	0	0	0	0
cra_locus_10248_iso_4_len_1376_ver_3	Auxin-induced protein 5NG4	4.05685	0	0	0	2.56424	2.92127	2.84178	0	0	0.459027	0	0	0	0	2.99646	6.64339	5.01329	1.45127	2.89526	3.46046	0.977207	6.09131	1.22408
cra_locus_10249_iso_3_len_3981_ver_3	Pentatricopeptide repeat-containing protein	13.7452	20.935	24.0649	20.5129	22.3878	20.0071	19.4893	22.7994	29.0229	23.4682	21.5555	22.5279	13.4591	18.9886	19.4579	16.7259	17.9931	17.6999	20.906	21.8856	14.8217	19.8861	13.4899
cra_locus_1024_iso_3_len_1139_ver_3	Hyoscyamine 6-dioxygenase	12.8681	12.3219	13.9058	11.4331	7.54	8.36399	9.35286	14.4268	16.5989	17.101	7.1391	8.31167	6.5634	9.50055	7.58582	8.54555	6.74337	6.27885	7.54739	6.76556	5.43516	6.23412	6.68445
cra_locus_102501_iso_4_len_953_ver_3	Conserved gene of unknown function	0	29.7367	35.5449	26.7201	0	0	0	45.4843	40.9131	61.2286	23.8908	37.9422	0	0	0	0	0	1.10382	0	0	0	0	0
cra_locus_10251_iso_1_len_1155_ver_3	Integrase, catalytic region	5.71799	4.28391	2.70476	5.66949	4.71927	3.44002	5.25383	4.82199	8.32893	11.0922	3.33032	3.76904	3.14084	5.26175	4.14297	5.98696	7.58688	5.96318	3.59179	4.02465	5.65018	6.40892	3.82352
cra_locus_10252_iso_2_len_978_ver_3	Conserved gene of unknown function	2.90763	13.7689	13.7851	14.9127	2.65975	0	0	13.2533	13.7304	15.7672	11.7053	14.3882	2.31052	2.06367	0.779964	1.00582	0	0	0	0	0	0	0
cra_locus_102532_iso_1_len_296_ver_3	Endonuclease/exonuclease/phosphatase family protein	3.85015	2.28686	0	0	2.48778	0	0	5.66304	11.8119	4.16838	0	0	0	0	3.45877	0	10.0558	6.68493	17.0408	5.33433	4.92995	7.03465	0
cra_locus_102537_iso_1_len_333_ver_3	Organic cation transporter	10.6267	17.2034	29.5078	17.888	7.4222	6.23953	2.11889	26.3182	9.81469	16.3765	26.2271	27.6873	2.34483	7.28547	10.2019	4.9589	7.96626	8.22292	4.49521	4.36788	7.31458	9.53551	10.5355
cra_locus_10253_iso_7_len_2777_ver_3	Protein kinase atn1	13.5656	29.3742	23.2235	19.9282	17.1861	21.0986	13.0644	23.7599	18.0607	19.2828	24.4085	23.9714	12.3034	12.2116	42.1219	22.1871	22.2645	28.4242	27.6478	29.1186	25.3871	23.8145	24.2671
cra_locus_10254_iso_1_len_1764_ver_3	Metal ion binding protein	13.2221	2.14675	3.07188	1.06394	22.8176	26.4716	6.08396	2.37678	3.39632	2.56589	1.22341	1.70162	10.355	12.6683	27.4348	14.7511	67.4797	61.9208	78.298	42.6123	41.727	38.9154	31.7834
cra_locus_102558_iso_1_len_290_ver_3	Bypass1	0	0	0	0	0	0	0	0	0	0	0	0	16.2602	0	0	0	0	0	0	0	0	0	0
cra_locus_10255_iso_1_len_288_ver_3	Gene of unknown function	4.80467	0	0	0	5.89864	3.79821	3.80683	0	0	0	0	0	12.5624	7.45665	5.35157	8.29218	9.73809	3.60979	6.69226	7.49877	0	3.81681	0
cra_locus_10256_iso_3_len_2630_ver_3	Protein kinase family protein	7.17652	30.5179	16.1799	15.5247	21.9625	26.6878	15.7427	38.7639	12.2848	12.8131	12.7036	13.5853	14.576	11.3189	30.2822	19.8171	41.947	29.7692	33.5697	27.1801	34.7926	29.0371	38.8453
cra_locus_10257_iso_5_len_2969_ver_3	Protein kinase	45.3633	41.9523	38.0223	42.5904	38.4987	30.7627	33.7928	36.7955	36.8394	41.4309	31.5263	35.3662	34.5479	33.2981	36.6069	43.5663	36.9165	38.8545	36.4297	36.4654	39.5859	35.2719	39.5694
cra_locus_10258_iso_2_len_659_ver_3	R2R3 transcription factor MYB108 1	22.5007	8.62583	6.59211	3.90673	2.53043	6.63633	3.40624	10.2548	20.551	20.8066	33.6922	4.97909	0	0	13.6836	4.64004	1.54972	7.95977	2.06345	11.5092	14.6255	2.19679	16.8663
cra_locus_10259_iso_1_len_2825_ver_3	RNA-binding protein with multiple splicing	27.749	29.001	24.5825	26.4082	26.8213	25.948	31.758	23.9911	38.143	35.8469	27.355	25.2427	25.0192	24.5074	18.5883	26.3082	20.1946	21.2485	17.5127	20.1905	24.3236	23.0521	21.6227
cra_locus_1025_iso_1_len_1806_ver_3	Short-chain dehydrogenase	24.2969	2.92067	1.83073	2.46713	5.86862	6.40094	15.4705	7.77404	5.74469	6.29791	5.53447	3.0632	16.6779	11.8489	1.40635	2.58505	0.778348	0.573962	1.58503	0	0.740742	0	0
cra_locus_10260_iso_2_len_1262_ver_3	Protein PPLZ12	3.81761	5.59586	4.15415	4.61608	3.71715	2.04447	5.26829	10.7023	15.5488	14.342	2.69702	2.39441	2.98301	5.28801	0.461217	5.22549	0	0	0	0	0	1.04227	0
cra_locus_10261_iso_3_len_1878_ver_3	AP2 domain-containing transcription factor	13.8115	23.9746	26.1296	23.5442	15.0881	13.3009	14.8681	31.9296	27.9192	27.5547	22.2325	23.4516	6.92399	10.2417	10.5658	10.1957	12.1886	11.4919	12.0693	8.47319	9.90724	12.1898	13.3761
cra_locus_10262_iso_1_len_3510_ver_3	Glycosyltransferase	20.874	0.9382	0.526768	0.806191	24.1193	50.3649	26.8413	1.83576	2.45534	4.07573	1.37143	1.04668	8.82875	7.16119	13.9065	4.28452	25.8616	17.2015	12.0644	10.9169	50.4184	17.3515	97.338
cra_locus_10263_iso_1_len_1132_ver_3	Gene of unknown function	1.52062	1.66072	1.94536	1.74329	0	0	0	2.30549	8.57785	43.5563	62.5429	4.01492	1.28254	0.83783	0	0	0	0	0	0	0	0	0
cra_locus_102642_iso_1_len_342_ver_3	Cytochrome P450	5.35861	5.85233	4.53313	7.24877	5.72985	3.5358	6.02196	2.52491	2.65158	3.45676	6.32886	7.36897	3.16372	2.10834	3.30998	7.81458	4.67886	0	5.76788	4.55037	0	4.42164	0
cra_locus_10264_iso_1_len_687_ver_3	Chlorophyll a-b binding protein 7, chloroplastic	74.2501	58.2754	72.4781	94.9149	248.231	36.1613	68.311	25.1727	10.3428	7.3295	38.4951	77.3971	1624.14	842.785	5.46425	142.072	9.52088	10.2045	13.8295	7.87105	6.33477	3.00472	3.89794
cra_locus_102651_iso_1_len_560_ver_3	Phosphoribosylanthranilate transferase	4.58515	1.49486	1.82493	1.44847	3.1273	3.35786	2.40294	1.68262	0	1.28087	0	0	2.26448	3.90937	10.2292	6.29158	5.20951	3.04122	8.16053	2.68223	2.4789	3.5372	2.41511
cra_locus_102652_iso_1_len_327_ver_3	Inosine monophosphate dehydrogenase	0	0	0	0	0	0	0	0	0	0	0	0	0	0	0	0	0	0	0	0	0	0	0
cra_locus_102659_iso_1_len_278_ver_3	UBX domain-containing protein	0	0	0	0	0	0	0	0	0	0	0	0	0	0	0	0	0	0	0	0	0	0	0
cra_locus_10265_iso_9_len_3531_ver_3	Eukaryotic translation initiation factor 2c	3.76972	90.0371	83.0527	76.9138	29.9116	26.3877	29.8437	61.7027	60.267	55.3688	91.5231	104.852	18.8241	40.5584	15.9207	44.0874	13.4748	12.7176	22.355	28.3212	13.0928	14.7634	17.6298
cra_locus_10266_iso_1_len_1557_ver_3	Gene of unknown function	0	0	0	0	0	0	0	0	0	0	0	0	0	0	0	0	0	0	0	0	0	0	0
cra_locus_102675_iso_1_len_277_ver_3	EuFUL FRUITFULL-like MADS-box	0	0	0	0	0	0	0	0	0	0	0	0	3.70772	0	0	0	0	0	0	0	0	0	0
cra_locus_10267_iso_2_len_2508_ver_3	Ubiquinone biosynthesis protein ubiB	47.1643	38.0789	31.8304	36.0524	36.5746	33.5816	25.2207	37.5388	53.5664	51.4551	25.4873	28.7311	80.4043	61.5289	21.9773	30.1296	17.0663	17.6228	14.1878	14.1544	13.7612	13.8374	12.9698
cra_locus_102680_iso_1_len_422_ver_3	Derlin-2	0	0	0	0	0	0	0	0	0	0	0	0	0	0	0	0	0	0	0	0	0	0	0
cra_locus_10268_iso_4_len_4199_ver_3	Nucleotide binding protein	81.8577	101.985	75.2425	81.0823	90.7632	83.482	98.7778	109.636	100.987	95.4746	69.3623	77.4361	64.1675	71.2771	99.4724	114.837	87.311	80.2858	90.0247	100.416	80.2037	100.515	68.4267
cra_locus_10269_iso_7_len_5177_ver_3	DNA binding / nucleic acid binding / protein binding / zinc ion binding	43.5003	57.335	64.0541	52.4263	41.8181	38.3735	32.0072	59.6236	51.8796	56.9906	57.6969	65.001	28.0564	38.2785	32.2226	31.0456	40.7749	52.0729	46.3795	49.0198	38.6733	40.3448	37.9716
cra_locus_1026_iso_10_len_1933_ver_3	Phenylalanine ammonia lyase	205.081	939.299	731.433	543.971	173.595	229.53	114.565	778.937	521.287	661.24	929.942	536.259	473.539	312.003	320.349	250.537	401.972	366.939	425.776	452.564	355.057	300.097	296.406
cra_locus_102709_iso_1_len_452_ver_3	Monosaccharide transporter	0	0	0	0	0	0	0	0	0	0	0	0	0	0	0	0	0	0	0	0	0	0	0
cra_locus_10270_iso_2_len_2090_ver_3	Galactolipase/ phospholipase	21.3689	7.91015	7.01911	6.12026	18.2738	18.5853	19.5579	8.77032	8.09408	9.54014	7.6212	7.4309	9.74664	9.05409	14.1869	16.1229	19.4222	16.4957	17.0652	20.2291	15.7538	19.7135	19.3337
cra_locus_102714_iso_1_len_290_ver_3	Gene of unknown function	3.10947	0	2.9172	2.94689	6.61693	5.65366	3.33323	2.89661	0	6.1594	0	0	2.98103	5.49595	9.29207	2.28573	10.5986	6.83861	6.08757	0	10.0866	0	6.66832
cra_locus_10271_iso_3_len_1182_ver_3	Gene of unknown function	0	8.79084	10.3255	11.2736	2.30438	2.07967	2.66601	6.67616	7.19813	7.29315	9.38881	14.8031	0.981534	1.74409	6.70966	2.58706	0.917331	3.24349	1.00219	0	0	0	1.35059
cra_locus_102722_iso_1_len_291_ver_3	Carbohydrate binding protein	0	0	0	0	0	0	0	0	0	0	0	0	0	0	0	0	0	0	0	0	0	0	0
cra_locus_10272_iso_5_len_2014_ver_3	Nitrate transporter	33.4567	89.0488	53.019	44.7717	26.335	68.6997	75.8492	41.0981	15.3862	16.057	3.90299	16.6156	68.4502	39.7241	40.0322	34.0505	38.3436	43.9098	102.964	57.0087	58.1879	23.7548	53.0454
cra_locus_102731_iso_1_len_322_ver_3	Gene of unknown function	0	0	0	0	0	0	0	0	0	0	0	0	0	0	0	0	0	0	0	0	0	0	0
cra_locus_102732_iso_1_len_482_ver_3	Conserved gene of unknown function	3.82197	7.81774	5.80629	11.8851	1.75957	2.17161	2.81669	4.55157	2.38174	3.13932	3.27997	6.72089	3.59124	2.53659	2.52846	2.3705	3.41246	3.002	6.21767	0	2.90574	0	3.03317
cra_locus_102736_iso_1_len_383_ver_3	Nodulin family protein	2.29257	0	0	0	0	3.12628	0	0	0	2.79462	0	0	0	1.7056	0	0	2.29831	0	2.44816	7.68094	8.98603	95.7836	9.05666
cra_locus_10273_iso_3_len_1165_ver_3	Rad1 DNA damage checkpoint protein	3.23866	1.55873	0.792098	1.151	12.0452	8.22668	15.1122	1.33101	3.06846	2.55814	1.18338	1.38064	7.53393	9.37784	2.95456	5.77671	8.59439	5.46177	5.53098	7.75049	4.15205	13.1401	7.82162
cra_locus_10274_iso_6_len_3669_ver_3	Conserved gene of unknown function	24.2579	36.5181	28.6567	28.5257	23.96	21.2152	25.7805	35.8182	23.0287	21.369	26.6881	24.2308	25.922	20.3206	29.2925	40.6622	20.4518	17.8394	22.8567	22.3031	12.6567	22.9486	15.7535
cra_locus_10275_iso_6_len_1126_ver_3	Gene of unknown function	109.541	42.7585	47.651	41.5769	144.655	136.531	110.921	59.0803	36.0122	59.6608	45.2772	49.1995	108.709	202.134	216.41	153.522	91.4468	140.391	72.879	49.9266	105.892	53.4377	124.418
cra_locus_102779_iso_1_len_1042_ver_3	Conserved gene of unknown function	12.1776	15.1292	17.8338	12.6038	10.2947	9.34696	5.78264	16.6903	13.5184	19.1657	21.5125	16.849	7.89012	9.23373	7.47299	8.42156	10.923	9.14547	12.4764	4.72923	5.73904	5.1721	6.78196
cra_locus_10277_iso_2_len_2088_ver_3	Ubiquitin-protein ligase	47.6142	20.9956	35.8356	24.0939	31.6473	33.7727	22.5345	14.3532	15.5186	18.3481	104.807	48.7062	21.5047	32.774	57.1889	24.4831	36.5904	43.7148	34.9704	36.2842	18.8591	34.088	30.3856
cra_locus_10278_iso_4_len_1637_ver_3	Emsy N terminus domain-containing protein	2.38895	5.58191	6.54291	5.16585	4.21345	4.62656	3.57078	8.42012	5.62587	6.03697	4.4441	3.55727	2.77121	2.22802	1.9786	3.93265	3.64299	3.22428	3.63798	3.78452	4.16118	2.45909	2.67741
cra_locus_10279_iso_1_len_1382_ver_3	30S ribosomal protein S5, chloroplastic	72.6195	48.8294	58.5762	40.0202	293.826	199.401	270.53	44.0412	26.438	26.3684	120.014	64.0975	318.319	425.646	22.3524	64.1551	18.1602	20.7931	21.7249	29.2834	21.7275	37.5548	23.0866
cra_locus_1027_iso_1_len_1557_ver_3	2-oxoglutarate-dependent dioxygenase	0	0	0	0	5.73818	18.2278	21.6355	0	0	0	0	0	0	0	52.7698	0	162.933	32.9297	245.115	112.277	28.4997	84.5575	9.41195
cra_locus_10280_iso_5_len_6806_ver_3	E3 ubiquitin-protein ligase UPL1	35.2395	34.3543	26.4939	30.9267	28.4533	34.0124	23.9113	34.197	38.2703	46.266	31.3625	30.9029	24.5897	25.1472	34.8422	38.2224	31.382	18.4988	44.6517	17.1951	14.1141	16.0018	16.1928
cra_locus_10281_iso_2_len_1155_ver_3	DECOY	17.7306	11.9299	9.71253	11.0658	25.3071	23.7525	24.0028	18.3114	14.0044	16.4187	13.3841	12.8639	19.7245	26.3087	19.4517	19.4973	18.642	26.4946	23.0259	24.2629	21.8214	28.3573	16.5957
cra_locus_10282_iso_4_len_1977_ver_3	Pentatricopeptide repeat-containing protein, mitochondrial	2.6108	4.51362	3.55324	3.67196	3.47804	3.66124	2.73913	5.32753	4.38831	6.22118	2.83305	3.36264	4.46613	4.31686	3.14814	3.03188	2.25537	1.61437	1.96494	1.66169	2.02715	1.87764	1.4107
cra_locus_10283_iso_1_len_3797_ver_3	Chloroplast processing enzyme	11.8605	13.0448	9.91965	12.921	11.3174	11.9932	13.2682	20.9943	31.8498	25.5824	7.98044	8.91255	11.676	10.3827	11.198	14.9144	12.3077	7.28586	9.60259	10.893	10.2763	11.0451	11.3043
cra_locus_102845_iso_1_len_508_ver_3	Photoperiodic response / GIGANTEA	0	0	0	0	0	0	0	0	0	0	0	0	2.80565	0	0	0	0	0	0	0	0	0	0
cra_locus_10284_iso_3_len_1354_ver_3	Zinc finger, C3HC4 type family protein	10.9434	6.8202	9.03741	7.9526	7.26902	6.44998	2.97651	10.5297	11.0242	13.1128	10.039	9.60892	3.14957	3.68959	12.1427	5.17783	13.6931	15.0103	13.354	11.7264	10.0171	13.5786	7.81207
cra_locus_10285_iso_3_len_899_ver_3	CAAX amino terminal protease family protein	1.11941	9.26416	5.01228	7.24935	5.72619	4.38159	7.59976	9.00582	7.44089	6.75165	4.22895	3.4995	5.77237	3.06541	5.23814	3.97718	7.94899	7.034	5.56182	8.03661	4.41288	10.34	3.68512
cra_locus_10286_iso_1_len_1071_ver_3	Aquaporin, MIP family, NIP subfamily	3.27121	9.3757	6.97486	1.40246	21.865	17.2296	20.0934	16.2258	4.46036	7.53601	7.40129	4.07288	8.1457	11.1672	46.0964	7.32838	39.7431	67.5385	34.8628	22.9881	16.6327	27.5125	17.5819
cra_locus_10287_iso_3_len_2497_ver_3	Cyclin-like F-box; FAR1; Zinc finger, SWIM-type	40.7101	26.9423	21.1746	26.0223	15.7716	16.8656	10.9745	27.0125	12.2407	23.2743	50.5424	18.6164	14.7597	16.8735	14.1651	16.0989	14.6699	13.8787	12.9634	11.5419	13.5559	15.0206	12.7307
cra_locus_102885_iso_1_len_278_ver_3	Pectinacetylesterase protein	0	0	0	0	0	0	0	0	0	0	0	0	0	0	0	0	0	0	0	0	0	0	0
cra_locus_10289_iso_5_len_1126_ver_3	Gene of unknown function	2.51535	3.89622	4.03819	5.25847	6.23669	4.37167	6.6616	4.3856	6.05247	4.84727	1.54794	3.36407	4.31999	4.55905	2.85262	6.5259	2.81831	3.79646	4.01592	1.65242	1.2999	1.62206	1.41953
cra_locus_1028_iso_2_len_2217_ver_3	Pumilio homolog 7, chloroplastic	1.03857	2.1488	1.86646	1.68732	3.21797	3.70925	5.96417	7.69585	17.1451	10.7102	1.97256	0.843323	1.22843	2.18141	3.81388	4.52613	2.90041	2.48612	1.55136	3.01801	2.40639	4.15662	2.76312
cra_locus_10290_iso_4_len_3917_ver_3	Nuclear-pore anchor	23.2951	25.3471	26.8822	23.996	19.1515	19.2927	14.2012	26.551	21.1329	26.558	22.0013	25.2954	14.3538	22.1166	12.7482	16.6483	19.6495	14.1001	25.6896	15.0526	9.50772	15.408	12.0628
cra_locus_102917_iso_1_len_350_ver_3	Gene of unknown function	6.91057	12.1738	8.40956	16.5329	7.86325	6.12921	11.0215	4.06805	4.91245	7.70478	10.1391	12.9336	10.7971	6.50737	6.27313	6.69057	0	2.64779	2.69984	0	0	0	0
cra_locus_10291_iso_5_len_2318_ver_3	DNA-directed RNA polymerase II	16.2621	19.8729	20.1694	22.681	10.0114	11.0665	7.17059	15.5533	25.7794	27.8766	22.379	18.7421	12.5148	11.3014	13.8618	10.9203	13.0446	11.1766	13.6932	8.59798	13.0825	7.42819	11.7654
cra_locus_102921_iso_1_len_351_ver_3	Rhamnose synthase	0	0	0	0	0	0	0	0	0	0	0	0	0	0	0	0	0	0	0	0	0	0	0
cra_locus_10292_iso_1_len_3651_ver_3	Phosphoenolpyruvate carboxylase	4.25727	14.4472	17.868	15.8627	10.2515	7.65574	5.94069	25.7875	29.032	31.2398	9.06396	15.5379	8.26051	12.8365	32.8049	29.5488	6.28958	6.24198	8.83317	9.04421	4.1793	4.06666	2.02323
cra_locus_10293_iso_5_len_2867_ver_3	Condensin complex subunit 2	6.65347	6.15326	6.18269	5.47449	2.72667	2.59973	4.10769	8.9604	9.38733	11.4816	4.31303	4.06358	3.28985	4.01127	5.05798	4.05705	5.73363	4.73188	10.0519	6.4785	8.27131	3.62261	7.5205
cra_locus_10294_iso_1_len_1650_ver_3	Gene of unknown function	6.0413	5.04747	5.50834	4.5076	3.40109	3.79294	4.32929	3.56151	3.94237	4.76796	5.93615	4.61013	4.53801	2.74588	6.34367	3.09145	5.06933	6.50171	5.65825	4.39317	3.11278	5.0007	4.2382
cra_locus_10295_iso_1_len_703_ver_3	2-oxoglutarate-dependent dioxygenase	0	0	0	0	4.13917	3.10155	1.03261	0	0	0	0	0	0	0	30.5622	0	0	0	4.60755	0	0	1.61337	3.94132
cra_locus_102964_iso_1_len_282_ver_3	Glyoxalase-I	0	0	0	0	0	0	0	0	0	0	0	0	0	0	0	0	0	0	0	0	0	0	0
cra_locus_10296_iso_4_len_2114_ver_3	Dimethylaniline monooxygenase	3.42533	13.4711	10.3245	9.03783	10.3857	12.7832	21.5581	10.0868	3.46308	3.46965	3.7328	8.31885	4.7833	5.48944	10.0749	5.77978	13.3844	18.1402	15.795	16.7049	15.8882	17.7797	12.1257
cra_locus_102974_iso_1_len_290_ver_3	Gene of unknown function	0	0	0	0	0	0	0	0	0	0	0	0	0	0	0	0	0	0	0	0	0	0	0
cra_locus_10297_iso_3_len_2966_ver_3	Oxysterol-binding protein	23.239	6.29927	11.3359	9.9514	34.4445	29.7055	28.3376	11.9111	23.6522	11.8525	3.63766	3.64389	24.6851	46.713	27.604	44.9209	24.1006	22.312	25.7949	24.5996	3.73481	28.9464	5.08378
cra_locus_10298_iso_5_len_1439_ver_3	Wound-responsive protein	18.6105	8.48767	7.75625	7.09134	11.8715	15.0875	14.3144	8.62764	10.6539	9.60352	8.38004	7.26298	10.9358	12.7871	16.4067	14.5125	13.0984	14.9493	10.2441	13.407	17.115	16.2656	24.9468
cra_locus_10299_iso_1_len_1110_ver_3	Conserved gene of unknown function	8.05815	6.21325	6.72322	7.89772	6.51334	5.74454	4.93602	4.06904	4.91364	5.20501	3.79622	7.1691	5.9543	6.63851	8.63247	9.87855	6.09637	8.17705	7.48262	7.18661	6.18981	8.32177	4.9148
cra_locus_1029_iso_1_len_1552_ver_3	Phospholipase C	126.754	15.6357	15.725	22.5237	53.2524	56.0336	20.6021	10.5146	22.1246	15.7521	9.57009	23.6252	154.142	84.4149	104.022	95.4209	79.2234	49.2776	74.3546	78.2143	99.1041	70.8149	53.9506
cra_locus_102_iso_1_len_312_ver_3	Gene of unknown function	0	2.80484	0	0	0	0	0	0	0	2.40332	0	3.58606	0	0	0	0	0	0	0	0	0	0	3.23681
cra_locus_10300_iso_7_len_1328_ver_3	Cinnamoyl-CoA reductase	40.4848	41.5523	33.4629	25.3419	9.56216	72.5592	34.4239	60.8981	42.2959	68.3995	46.6244	26.5628	0.980117	5.56194	10.811	4.59258	16.9735	53.5221	12.6205	4.78443	97.1095	4.94657	91.0375
cra_locus_10301_iso_1_len_1706_ver_3	Lecithine cholesterol acyltransferase	29.9399	69.2515	45.3193	43.5707	12.3975	11.7688	16.1164	38.77	17.8163	27.9105	52.907	67.4479	10.7975	14.7907	4.50525	6.93693	7.51988	5.72709	6.15835	5.01856	2.55097	5.0695	3.22272
cra_locus_103024_iso_1_len_436_ver_3	UDP-glucosyltransferase	0	0	0	0	0	0	0	0	0	0	0	0	2.43304	0	0	0	0	0	0	0	0	0	0
cra_locus_103027_iso_1_len_341_ver_3	Sphingolipid fatty acid alpha hydroxylase	0	0	0	0	0	0	0	0	0	0	0	0	0	0	0	0	0	0	0	0	0	0	0
cra_locus_10302_iso_1_len_1168_ver_3	Multidrug resistance pump	0	15.1174	20.6011	25.1878	0	0	0	13.0337	18.6537	13.9513	13.9768	20.4931	0	0	0	0	0	0	0	0	0	0	0
cra_locus_10303_iso_1_len_686_ver_3	Gene of unknown function	1.81173	1.30111	2.10707	1.52189	1.01102	2.52672	2.29521	1.0461	1.89485	2.25866	1.83076	0	2.36849	2.15792	3.04035	2.08847	2.72439	1.42304	1.20917	0	0	0	2.23079
cra_locus_10304_iso_2_len_3370_ver_3	F-box family protein	5.21452	5.95789	6.40171	6.28479	4.03592	4.17743	3.94061	5.08111	5.86253	4.75622	5.48494	5.63333	4.78461	3.99042	10.3393	6.07111	6.01496	6.02922	6.2904	7.16958	6.33656	7.57467	4.85289
cra_locus_10306_iso_1_len_441_ver_3	Type I inositol polyphosphate 5-phosphatase	0	5.03887	4.87208	8.96083	4.35301	3.58157	3.37854	4.67088	11.2808	6.75337	3.26291	5.59827	0	3.58987	3.3398	3.62	6.91167	3.71334	5.25879	5.0283	0	11.2772	0
cra_locus_10307_iso_9_len_2160_ver_3	Amino acid transporter family protein	22.1903	8.39529	6.39877	6.24406	14.3071	13.6181	17.5002	9.44979	8.21766	5.97708	9.26338	5.23858	12.4469	11.5049	15.1051	14.6415	15.2717	15.555	14.9118	17.6203	10.5522	21.8029	12.2508
cra_locus_10308_iso_1_len_2686_ver_3	F-box family protein	12.5844	26.1289	24.2013	25.2134	19.4246	18.3965	19.9512	19.6848	25.7386	29.8566	26.6291	26.598	17.4633	20.9763	49.9742	29.7278	29.5493	26.7106	33.5961	23.4884	26.5456	21.0956	24.9259
cra_locus_10309_iso_2_len_980_ver_3	Gene of unknown function	0.853387	1.1557	1.09175	1.21315	0.977847	0.646515	1.21973	0.794969	0	0.715184	0	0	1.63628	1.77329	0	0	0	0	0	0	0	0	0
cra_locus_1030_iso_8_len_1604_ver_3	Spermidine synthase 1	100.493	114.885	88.0008	84.6268	139.884	161.314	152.743	135.901	132.418	118.83	68.4369	80.1901	100.706	97.2119	86.3243	102.627	211.864	400.717	245.659	273.9	281.628	233.096	139.896
cra_locus_10310_iso_1_len_1475_ver_3	Conserved gene of unknown function	8.60587	9.03643	14.5997	7.28713	7.53354	8.20632	4.93346	25.4287	3.96032	5.13119	15.6089	12.7607	7.48407	9.65113	5.07025	4.45576	12.1534	10.11	14.8337	15.3118	6.00843	9.38002	5.71438
cra_locus_10311_iso_1_len_1719_ver_3	Anthranilate phosphoribosyltransferase	51.8317	67.0929	62.9098	40.869	65.0677	274.166	90.8753	111.593	87.709	116.93	139.498	47.7129	32.1432	45.8283	119.426	43.9843	276.962	339.826	165.253	156.754	494.91	177.881	435.189
cra_locus_10312_iso_5_len_3460_ver_3	AP-1 complex subunit gamma-2	54.4516	81.6674	56.0031	78.6624	42.3594	39.5853	53.8905	73.4762	95.5247	97.2066	59.2879	65.2082	36.139	39.3771	49.7272	68.5428	47.9008	45.1106	46.5614	53.3237	43.7679	46.0134	37.6445
cra_locus_103138_iso_1_len_289_ver_3	Gene of unknown function	0	10.568	10.6488	23.37	0	0	0	2.90775	16.9181	12.3662	10.8852	11.0002	0	0	0	0	0	0	0	0	0	0	0
cra_locus_10313_iso_4_len_1298_ver_3	Ubiquitin-protein ligase	47.1125	13.5206	11.8907	13.0311	23.5545	30.9114	14.5795	8.77387	17.92	23.8261	52.4101	20.3567	23.4658	17.5956	10.2162	14.3385	20.324	30.2067	16.4474	19.5902	73.4734	23.7596	59.9999
cra_locus_10314_iso_1_len_1218_ver_3	S-adenosyl-L-methionine:salicylic acid carboxyl methyltransferase	15.517	0	0	0	0	6.20524	18.9262	0	0	0	0	0	0	0	2.1526	1.00349	1.71069	9.2214	3.8874	3.15802	0	3.07624	1.77194
cra_locus_103155_iso_1_len_461_ver_3	Gene of unknown function	0	14.6995	25.1553	22.2552	0	0	0	17.5004	13.0639	12.7383	21.6192	31.6074	0	0	2.12224	0	0	0	7.35581	0	0	0	0
cra_locus_103157_iso_1_len_406_ver_3	Hydrolase, carbon-nitrogen family protein	0	0	0	0	0	0	0	0	0	0	0	0	0	0	0	0	0	0	0	0	0	0	0
cra_locus_103160_iso_1_len_293_ver_3	Gene of unknown function	2.86919	3.00671	2.88405	0	3.01926	3.72628	0	0	0	0	3.75209	3.49468	2.94716	3.55188	2.8428	0	6.78002	3.86337	5.47126	0	0	0	0
cra_locus_10316_iso_3_len_3112_ver_3	Nodulation receptor kinase	36.5904	12.1009	9.13765	12.2743	24.4969	25.8458	27.3907	11.1687	26.5162	18.4109	2.08841	6.67333	28.1275	25.756	33.3605	46.3638	27.8942	17.3958	30.5234	28.4744	21.3477	21.2589	22.165
cra_locus_103174_iso_1_len_300_ver_3	14 kDa zinc-binding protein	0	0	0	0	0	0	0	0	0	0	0	0	3.65342	0	0	0	0	0	0	0	0	0	0
cra_locus_10317_iso_6_len_1583_ver_3	Senescence-associated protein DIN1	18.1742	184.435	307.647	329.482	21.4574	4.11473	63.4099	89.4711	63.0737	89.0858	498.599	430.841	94.218	40.4894	1.90132	6.10397	0	2.89877	0.604163	0	0	0.826975	2.35783
cra_locus_103184_iso_1_len_513_ver_3	Splicing endonuclease positive effector sen1	4.35968	9.71397	6.57849	6.99217	5.76405	4.82722	3.11561	7.24207	10.6315	11.3697	6.28596	8.38723	2.04596	3.16324	4.84788	4.5606	5.54729	2.45851	6.26708	0	3.62617	3.67644	3.59593
cra_locus_10318_iso_2_len_357_ver_3	Secologanin synthase	23.7478	513.214	189.465	167.512	160.238	590.774	941.325	550.955	275.624	308.999	157.65	75.9313	111.677	143.625	235.284	141.102	798.225	464.255	383.073	650.43	2980.73	1271.78	4368.14
cra_locus_10319_iso_6_len_1803_ver_3	Galactosyltransferase family protein	15.7068	7.60659	7.88155	5.20274	15.8009	13.2741	15.2025	11.3515	10.4328	10.6305	8.33569	7.69696	9.64887	12.7867	11.3339	11.0975	12.7957	12.8881	15.8364	20.0714	11.6864	20.0051	13.9933
cra_locus_1031_iso_8_len_2641_ver_3	S-adenosylmethionine-dependent methyltransferase	162.376	80.0877	77.538	69.1105	177.274	162.724	176.082	132.826	156.298	136.137	73.0019	67.4639	121.262	149.389	117.142	167.279	143.876	119.259	148.533	220.342	127.371	209.708	116.992
cra_locus_10320_iso_1_len_1891_ver_3	Poly(A) polymerase	5.05577	8.18133	6.6168	8.03408	17.2122	11.2597	11.8516	10.9994	17.2493	16.9181	5.49077	6.51547	18.442	20.1212	6.38952	10.3004	2.55601	3.33221	3.37444	4.24178	3.09274	4.27376	2.45977
cra_locus_10322_iso_5_len_2393_ver_3	Bifunctional lysine-ketoglutarate reductase/saccharopine dehydrogenase	42.6384	37.1676	42.7776	53.0979	30.964	32.9005	20.7066	30.1197	28.683	29.1892	118.372	74.3072	34.5581	18.0992	27.0102	28.0118	15.5906	17.042	21.6601	18.2935	35.079	12.7124	43.2434
cra_locus_103236_iso_1_len_485_ver_3	Gene of unknown function	0	0	0	0	0	0	0	0	0	0	0	0	0	0	0	0	0	0	246.596	164.972	177.286	0	0
cra_locus_10323_iso_1_len_311_ver_3	Gene of unknown function	40.4826	73.6176	111.189	109.643	96.8091	107.487	60.2605	105.774	91.2351	76.7405	87.8148	94.8768	112.87	210.204	141.082	99.4294	86.2649	75.9522	71.4524	32.1401	20.2268	30.8485	23.0628
cra_locus_10325_iso_1_len_277_ver_3	Gene of unknown function	0	0	0	0	0	0	0	0	0	0	0	0	0	0	0	0	0	0	0	0	0	0	0
cra_locus_10326_iso_1_len_917_ver_3	Conserved gene of unknown function	0	0	0	0	0	0	0	0	0	0	0	0	3.66404	2.88036	0	0	0	0	0	0	0	0	0
cra_locus_10327_iso_6_len_1497_ver_3	RNA Binding Protein 47	65.8618	253.679	232.924	219.267	154.702	130.003	151.396	254.315	248.983	232.961	237.805	257.987	64.3717	80.1168	146.723	150.16	114.78	157.309	117.777	180.459	111.186	216.229	124.236
cra_locus_103284_iso_1_len_292_ver_3	Cinnamoyl-CoA reductase	0	0	0	0	0	0	0	0	0	0	0	0	0	0	0	0	0	0	0	0	0	0	0
cra_locus_103285_iso_1_len_314_ver_3	Gene of unknown function	0	2.57092	2.42867	2.9686	0	0	0	0	3.4945	3.68816	4.96517	9.06409	0	0	0	0	2.85474	0	0	0	0	0	3.5355
cra_locus_10328_iso_1_len_1961_ver_3	Pentatricopeptide repeat-containing protein	5.01281	13.6846	14.5098	14.6503	7.08245	5.95105	5.10336	13.8027	11.7275	11.5533	8.93576	9.69394	4.68617	5.02667	7.40665	6.48452	6.52735	6.81889	5.196	5.49547	7.77833	5.67958	5.45248
cra_locus_103293_iso_1_len_309_ver_3	Conserved gene of unknown function	3.0917	6.76013	3.95527	4.12038	3.08396	2.63501	2.89991	3.92735	4.44613	6.84556	3.53768	6.26047	0	2.16456	2.05954	2.98288	0	3.33906	4.1269	0	0	0	0
cra_locus_10329_iso_4_len_1269_ver_3	Hydrolase	7.94118	4.08703	4.4098	3.16339	14.3561	16.1147	16.0431	4.10155	4.81903	4.03895	4.50769	2.90171	6.2746	6.83545	7.8421	10.392	7.0206	4.38679	5.59128	9.81532	8.1384	12.5961	9.08629
cra_locus_1032_iso_4_len_4922_ver_3	Myosin vIII	36.6559	17.5953	15.6739	14.5245	22.5892	24.5658	21.2767	12.417	18.7938	12.7124	12.537	12.5577	37.3536	36.8214	27.7393	29.5057	29.714	22.8597	30.4794	32.1249	20.2435	29.7596	23.0829
cra_locus_10331_iso_4_len_1707_ver_3	Zinc finger family protein	1.12852	0.727762	0.536247	0.962569	10.6484	9.63658	11.7172	1.31068	2.47302	2.24773	0.674647	0.659782	2.48699	5.30466	9.74989	7.32388	7.80631	11.7006	6.02556	7.25328	4.37982	15.7297	10.9725
cra_locus_10332_iso_4_len_1136_ver_3	Calcium-binding EF hand family protein	11.7789	21.4562	13.7559	8.75442	25.5615	33.1023	25.777	34.8921	31.8633	31.7253	11.5686	10.7511	6.32561	6.87473	33.047	15.2512	48.9484	77.0091	48.6038	55.0899	29.0331	57.0628	31.1131
cra_locus_103331_iso_1_len_366_ver_3	Gene of unknown function	3.85315	2.89896	4.10784	5.24931	1.97103	3.10155	2.75362	0	3.20157	2.93559	0	4.10651	0	1.79293	2.90011	3.36349	7.00132	3.0265	3.64318	5.37894	12.3688	4.10675	8.42627
cra_locus_103338_iso_1_len_336_ver_3	Fb31	0	0	0	0	0	0	0	0	0	0	0	0	0	0	0	0	0	0	0	0	0	0	0
cra_locus_10333_iso_6_len_2490_ver_3	Plasma membrane receptor-like kinase	8.64005	34.2388	37.5477	42.6917	24.8313	26.682	9.21467	23.1795	37.9394	24.7474	25.415	34.2646	27.3615	25.4706	79.8597	79.1476	29.7538	25.4188	30.9014	26.727	17.6059	18.3973	18.7595
cra_locus_10334_iso_1_len_1215_ver_3	Gene of unknown function	0	1.28708	2.97645	6.55	1.79221	0.829458	0	0	0.979699	0.834144	9.54518	7.15673	10.0193	9.48483	0	0	0	0	0	0	0	0	0
cra_locus_10336_iso_1_len_429_ver_3	Gene of unknown function	9.87411	4.4268	4.15303	2.4997	6.64159	7.53138	6.37946	2.06186	2.07486	2.78239	2.12261	3.45973	6.0122	6.84954	5.87882	4.92175	15.0516	5.09914	18.7774	9.38721	7.12995	12.8512	5.7251
cra_locus_10337_iso_6_len_1936_ver_3	Poly(A)-specific ribonuclease PARN	8.85195	6.98003	5.88001	7.54215	7.66294	7.25423	8.81986	5.22583	6.31054	8.07336	5.3427	5.95067	9.82901	10.2993	9.58846	9.41633	8.27681	6.73	8.21808	7.67231	6.67237	7.10182	5.95627
cra_locus_10339_iso_3_len_2308_ver_3	Lipid binding protein	10.2322	14.5481	10.2353	15.322	8.07345	7.25717	11.0958	11.1884	15.2587	19.4256	11.9837	13.3187	9.80748	6.90108	10.2615	9.34523	8.24669	6.30277	9.85547	7.7835	10.6852	7.50416	9.56612
cra_locus_1033_iso_4_len_2047_ver_3	Serine-threonine protein kinase, plant-type	43.2517	40.7869	49.0488	37.1991	49.8343	54.019	25.4209	93.4887	61.9785	40.0461	16.1632	20.8018	27.3394	24.6241	161.528	109.382	116.033	119.573	155.357	129.094	70.6635	105.028	80.072
cra_locus_10340_iso_1_len_335_ver_3	Gene of unknown function	0	3.19264	0	4.77569	0	0	1.89537	0	0	2.42474	2.31221	3.61802	2.54265	2.15737	0	2.72943	0	0	0	0	0	0	0
cra_locus_10341_iso_7_len_1077_ver_3	Conserved gene of unknown function	4.33664	0	1.05675	0.807301	6.21138	3.98939	1.49423	0.85255	1.26709	0.648988	0.67513	1.05641	1.95727	1.50461	11.0234	5.4079	16.7689	8.35343	20.9495	12.4784	4.60537	19.4315	1.31109
cra_locus_10342_iso_3_len_2335_ver_3	10-formyltetrahydrofolate synthetase	56.0052	63.9189	49.6466	46.9288	96.3231	108.729	268.889	77.6997	66.3308	56.8705	78.1788	53.8114	68.6767	66.7899	56.6128	47.8348	71.693	79.4286	73.0976	111.96	171.958	122.09	189.837
cra_locus_103439_iso_1_len_624_ver_3	Gene of unknown function	3.0917	5.13103	10.0045	8.14382	2.79091	2.48001	0	9.35634	7.2533	7.27422	5.70785	8.37313	0	0	4.89577	1.00265	4.1022	19.5701	4.85517	0	0	1.66143	0
cra_locus_10344_iso_1_len_854_ver_3	Conserved gene of unknown function	3.14791	6.587	2.68479	3.82238	31.2393	31.6734	7.45189	3.66553	0	2.62313	5.66029	2.79574	8.74502	8.71103	3.38443	10.1237	2.36684	1.54535	3.85177	3.29582	1.32959	3.23527	2.44271
cra_locus_10345_iso_2_len_2510_ver_3	Pentatricopeptide repeat-containing protein	1.50473	1.5997	1.17175	1.24005	3.15921	1.95776	2.71173	1.85603	1.30463	2.09343	0.570364	1.07841	2.93647	5.57312	1.66984	4.13588	2.00039	1.062	2.21232	2.03534	1.14953	1.71333	0.664583
cra_locus_10346_iso_1_len_1448_ver_3	Deacetylvindoline O-acetyltransferase	0	0	0	0	2.48083	97.7496	89.2044	0.823388	0.467626	0.675235	0	0	0	0	9.25264	0	14.3341	1.37764	2.74836	6.29601	567.396	32.3945	1426.22
cra_locus_10347_iso_1_len_1132_ver_3	Pentatricopeptide repeat-containing protein	2.40356	5.64646	4.39275	5.71798	2.70995	1.78375	2.20845	6.04413	2.40782	3.47554	3.46391	4.68407	3.52697	4.09058	2.94019	2.97477	3.46684	3.46758	10.2143	18.8994	14.0222	3.04722	4.06934
cra_locus_10348_iso_3_len_2443_ver_3	Double WRKY type transfactor	138.343	147.614	199.622	189.146	46.0341	48.8123	21.3588	227.41	137.316	207.853	229.113	229.272	41.6362	39.8608	101.001	19.6964	135.891	142.842	109.497	86.033	103.443	68.1012	94.0301
cra_locus_10349_iso_5_len_1126_ver_3	Conserved gene of unknown function	18.15	13.5811	11.5467	13.4617	13.9871	14.1239	16.6011	12.6556	4.69066	9.46909	11.4805	11.1855	9.92953	11.2985	17.1676	11.4203	20.544	17.5102	25.4122	18.7667	28.9978	18.924	28.8917
cra_locus_1034_iso_3_len_1537_ver_3	Glycerophosphoryl diester phosphodiesterase	42.8389	16.5605	13.1274	14.9951	23.3452	27.3578	33.6528	22.5601	27.6832	27.7993	17.0785	14.1938	21.5291	17.6059	14.0934	21.2046	30.4292	23.2776	58.0926	27.7332	36.7336	17.6996	18.8306
cra_locus_10350_iso_6_len_1267_ver_3	Protein binding / zinc ion binding	23.5561	37.2866	48.083	25.348	52.8493	73.3035	59.1226	53.7394	3.68715	16.4316	29.2044	34.8768	28.8526	42.2203	74.1385	70.3555	42.7831	67.8992	37.9188	32.1082	26.9356	25.6321	20.7177
cra_locus_10352_iso_1_len_3190_ver_3	Rad7	8.30142	12.9613	15.6127	15.4996	11.0321	10.8729	16.972	11.7411	16.2261	16.0983	14.7506	16.1987	11.2106	15.9633	9.09859	9.45538	10.4757	8.81939	11.081	11.3872	13.1172	10.6642	13.9388
cra_locus_10353_iso_2_len_2720_ver_3	Conserved gene of unknown function	14.4561	27.7501	26.4419	31.8402	12.0209	10.0759	6.63822	20.5854	23.2237	24.5164	21.7178	24.342	16.717	16.9635	22.4989	19.1099	9.49354	12.0969	7.62195	7.4579	5.21758	6.35525	5.99104
cra_locus_10354_iso_1_len_1597_ver_3	Aspartic proteinase nepenthesin-1	0	0	0	0	10.2093	5.4504	4.8825	0	0	0	0	0	0	0.519328	32.8664	24.6925	7.10864	1.19252	8.52093	7.01894	1.53904	8.4481	3.85568
cra_locus_10355_iso_7_len_1899_ver_3	U6 snRNA-associated Sm LSm4	38.2455	27.6894	40.768	25.6882	64.5671	64.2585	39.3901	44.9172	24.2645	28.0063	39.8993	38.2935	37.9242	65.3916	62.1712	32.6871	50.1772	72.6409	47.4682	34.7462	30.3138	37.0229	28.0509
cra_locus_10356_iso_1_len_1833_ver_3	Leucine-rich repeat/extensin	49.2761	0.913858	0.767374	0	61.8949	50.9864	73.5908	3.08593	2.62233	3.5988	2.23556	0	5.76362	23.9136	21.2193	41.2709	47.6255	53.2862	72.581	82.9697	24.5043	72.662	11.3233
cra_locus_10357_iso_4_len_1471_ver_3	Conserved gene of unknown function	5.40297	7.02901	6.72011	6.1339	5.43551	5.75609	6.39509	3.33634	3.45331	4.15922	6.62395	6.78191	7.60293	6.36413	8.74983	8.35703	5.75502	5.01006	6.51088	4.66914	3.04276	5.07302	4.25611
cra_locus_10358_iso_2_len_3012_ver_3	ATP binding protein	5.87661	57.9889	54.1346	47.1848	24.7614	22.7549	14.1933	57.6694	44.0708	53.7885	57.1389	66.3724	12.3063	11.9385	76.6259	63.3175	95.0248	50.5178	105.801	86.5072	42.5087	55.9064	26.6237
cra_locus_10359_iso_1_len_1419_ver_3	BZIP domain class transcription factor	113.892	17.3074	9.31195	10.7347	96.9118	98.8161	51.1135	32.9304	6.14995	13.8341	9.16234	11.3499	38.8262	43.9163	146.03	158.157	77.7312	71.6641	72.4805	73.1229	70.9444	63.7226	91.404
cra_locus_1035_iso_3_len_1397_ver_3	Proline transporter	14.8313	5.17754	2.52987	2.75495	5.68098	8.4495	3.05254	6.93315	9.70696	10.034	3.93076	1.75347	5.06704	4.44663	9.05866	8.80909	8.44529	15.4704	8.02452	7.47721	16.7584	6.21459	12.8564
cra_locus_10360_iso_3_len_3500_ver_3	Hypoxia-inducible factor 1 alpha inhibitor	4.05279	21.004	18.087	20.5635	5.16693	4.80036	4.36114	20.9097	22.8588	25.9187	20.0377	18.6327	3.11782	3.80952	7.54947	5.31092	5.7428	6.95429	6.80385	6.04309	4.45592	6.06632	4.11693
cra_locus_103633_iso_1_len_429_ver_3	Gene of unknown function	0	29.6137	27.5138	38.2646	0	0	0	16.1512	4.5647	14.994	15.212	28.7155	0	0	0	0	0	0	0	0	0	0	0
cra_locus_10363_iso_4_len_1359_ver_3	Acetylcholinesterase	0	0	0	0	1.34845	0	0	0	0	0	0	0	0	0	67.4947	19.7364	0	0	0	0	0	0	0
cra_locus_10365_iso_1_len_1218_ver_3	Plant-specific domain TIGR01570 family protein	5.27851	12.9411	18.1047	15.9132	22.793	21.253	14.7313	6.64743	8.51583	5.77227	12.0204	25.3733	1.30875	1.91958	103.134	13.5973	41.2617	79.061	40.6963	28.8578	16.2369	40.7394	19.4143
cra_locus_10366_iso_3_len_4109_ver_3	Condensin complex components subunit	1.84327	3.8162	4.22428	4.35468	16.8339	13.7886	20.6832	6.50227	8.72663	8.63814	2.02896	3.16577	3.22454	18.817	4.97575	7.09165	11.1073	4.3747	15.2407	16.1214	7.04391	16.3547	5.02911
cra_locus_10367_iso_1_len_963_ver_3	Gene of unknown function	0	4.96842	3.26076	1.39993	0.85341	0	0.745159	5.96041	2.75464	4.63401	2.65137	2.76581	0.90876	3.49498	0.731592	3.00204	0	0	0	1.52491	0	0	0
cra_locus_10368_iso_3_len_1330_ver_3	Conserved gene of unknown function	10.8542	0	0.957655	1.00502	5.25876	8.08124	3.34348	0	0	0	1.14206	1.91469	9.51427	10.1046	2.84061	0	6.87903	1.69858	7.99368	6.96657	2.10783	8.51022	3.02757
cra_locus_10369_iso_1_len_1425_ver_3	Conserved gene of unknown function	4.61208	3.4991	2.62787	3.08537	3.80652	3.34724	3.73914	5.41558	9.92842	8.10534	1.41913	1.91657	3.64806	3.42346	3.46095	4.48714	3.78826	3.22685	3.41444	3.80274	2.20012	2.33684	1.37796
cra_locus_1036_iso_3_len_3148_ver_3	Nodulin	21.4754	16.738	9.85329	10.0858	7.62415	8.47642	12.31	10.9296	11.0429	10.4472	7.57669	7.51328	9.57	12.3729	16.6238	13.083	11.921	26.5692	7.5254	11.7482	15.0522	13.9773	17.6801
cra_locus_10370_iso_1_len_1494_ver_3	TCP transcription factor	3.3977	19.1722	29.9547	22.3129	0.906809	0.461652	0	8.02225	18.8083	10.5513	8.88646	22.6713	11.2495	5.33727	1.78447	3.50209	0.610896	0.928264	3.6973	3.53526	0.823622	0	0
cra_locus_10371_iso_1_len_1706_ver_3	Organic anion transporter	4.42	5.27942	2.51774	3.89843	10.2983	9.16571	15.4247	4.18028	8.90817	7.1159	2.7002	2.58569	13.3281	13.4961	10.8736	11.7394	23.1418	16.0663	15.7619	20.8463	9.28813	21.398	9.94127
cra_locus_10372_iso_1_len_2742_ver_3	Auxin response factor 10	59.1601	103.01	124.211	120.148	30.8125	37.5065	29.2342	105.132	53.4277	64.7936	139.121	136.791	30.5166	36.4489	47.759	47.2995	48.807	83.5526	48.0893	52.3785	50.014	38.1866	37.5118
cra_locus_10373_iso_1_len_727_ver_3	Conserved gene of unknown function	0	0	0	0	6.28076	3.25916	1.41256	0	0	0	0	0	16.6189	14.7584	0	2.39314	0	0	0	0	0	0	0
cra_locus_10374_iso_4_len_2446_ver_3	Polyprotein	17.0574	22.5593	30.4132	28.0988	15.4997	20.185	11.8179	16.9476	12.4303	13.7374	51.9894	36.9878	17.4122	21.4817	32.1814	26.9286	19.9105	24.3167	20.3784	8.99976	13.8873	6.135	11.9382
cra_locus_10375_iso_3_len_4546_ver_3	P-glycoprotein	85.4871	83.7419	41.8797	37.1713	61.3357	62.5725	33.8334	98.2468	22.0853	17.6855	35.4943	27.0426	36.6265	46.2223	56.1541	141.081	55.1167	36.2218	68.7192	79.946	23.9685	57.8863	19.7723
cra_locus_10376_iso_1_len_2640_ver_3	Multidrug/pheromone exporter, MDR family, ABC transporter family	68.4167	1.36757	0.938052	1.1425	35.7783	44.2668	62.8978	1.49442	2.36038	3.82029	0.617748	1.44647	56.8785	49.9039	42.6015	52.8911	1.83125	18.4903	8.26881	4.26858	6.14486	1.11005	1.62799
cra_locus_103773_iso_1_len_322_ver_3	Gene of unknown function	0	0	4.72472	3.41256	3.17383	2.72794	1.97946	4.92595	6.23167	6.96389	0	0	0	6.01266	2.94986	4.07219	0	4.64132	2.71136	0	0	0	0
cra_locus_10377_iso_4_len_1435_ver_3	Conserved gene of unknown function	0.538738	0	0	0	6.28333	4.81024	2.47503	0	0	0	0	0	1.30799	1.50638	13.5833	8.18913	11.284	1.26947	13.9716	7.91975	1.8724	9.42149	3.84388
cra_locus_103784_iso_1_len_303_ver_3	Salt-induced AAA-Type ATPase	0	0	0	0	0	0	0	0	0	0	0	0	0	0	0	0	0	0	0	0	0	0	0
cra_locus_10378_iso_2_len_2272_ver_3	Receptor kinase	0.385945	0	0.308592	0	9.12098	7.64776	7.98982	0	0.407017	0	0	0	1.98667	8.2936	2.50541	10.6921	3.95375	2.55774	2.70465	5.42622	0	5.72947	1.16386
cra_locus_103795_iso_1_len_531_ver_3	Gene of unknown function	2.26334	4.86528	3.30919	4.90287	1.85246	1.95964	2.42622	0	3.63721	2.09387	3.38264	0	0	2.17762	2.73501	3.80288	2.43108	3.21691	2.30185	2.57926	0	2.16615	2.55463
cra_locus_10379_iso_1_len_3809_ver_3	Translation elongation factor EF-1 alpha	5.23871	9.48195	8.67961	10.8046	8.08332	7.46587	9.14469	12.6366	18.8384	15.3759	5.07255	7.0537	5.63235	5.16054	7.12656	6.12359	8.0284	8.43196	7.71882	8.18662	6.93552	7.7672	5.06475
cra_locus_1037_iso_6_len_1043_ver_3	Stress enhanced protein 2	59.1737	121.035	130.106	80.2513	19.3245	30.8631	3.77503	70.3554	15.142	25.0616	25.1196	85.7995	12.4862	11.6916	15.4925	12.7081	40.4394	53.729	25.7117	4.97995	13.5221	6.62935	7.31729
cra_locus_10380_iso_1_len_574_ver_3	Nudix hydrolase 4	14.2956	5.3777	6.73121	7.90307	16.8192	20.645	16.7077	3.53101	9.44157	7.71468	5.84204	10.8341	10.3827	15.7331	17.6205	1.97034	12.8385	12.6322	8.34844	4.51394	2.41523	7.43682	5.21037
cra_locus_10381_iso_7_len_1773_ver_3	Molybdopterin synthase sulfur carrier subunit	10.9202	20.4465	14.8436	17.5967	8.83619	9.94173	8.74629	13.596	21.3673	17.8686	12.0898	15.5529	10.261	8.77524	15.34	7.01251	13.1557	15.6927	15.2806	13.0667	15.0323	14.5676	16.9127
cra_locus_10383_iso_5_len_1602_ver_3	Gene of unknown function	0	0	0	0	0	0	0	0	0	0	0	0	0	0	0	0	0	0	0	0	0	0	0
cra_locus_10384_iso_2_len_2189_ver_3	CDK-activating kinase	18.8866	16.5369	11.5362	15.0267	15.4066	15.3709	22.6354	13.3003	8.3763	9.36051	10.8751	12.6857	14.6048	18.9838	18.7127	17.0687	17.3267	16.4086	19.1585	18.0431	13.2036	15.6979	16.9209
cra_locus_10385_iso_6_len_1945_ver_3	Retinal degeneration B beta	29.622	9.71977	10.2597	6.46301	22.5688	27.0836	16.0433	17.5409	18.5828	17.9103	13.3679	6.06717	15.6156	14.1869	17.6047	11.2403	18.1744	41.1219	21.8245	27.3014	30.6861	28.9446	49.3387
cra_locus_10386_iso_2_len_4288_ver_3	Carboxypeptidase regulatory region-containingprotein	42.5825	41.791	34.2592	36.8045	54.9139	50.9885	58.8834	38.7617	39.9091	41.39	26.7299	31.3886	38.4798	43.772	59.8727	53.6064	48.0826	44.6025	48.2093	55.2086	44.5565	59.3039	40.4777
cra_locus_10387_iso_2_len_1272_ver_3	Malate dehydrogenase	13.2974	26.4031	18.3205	18.6559	12.6914	10.9065	327.482	29.8026	52.7812	47.5046	16.7632	14.1766	8.19406	10.2718	9.65284	16.99	9.98146	11.2822	11.9977	8.17693	8.91278	7.55513	7.14814
cra_locus_10388_iso_2_len_2255_ver_3	Pentatricopeptide repeat-containing protein, chloroplastic	9.79524	23.343	26.6483	28.9204	7.10191	7.07089	3.77796	7.5336	5.33163	7.72192	18.4354	36.2655	26.437	23.3657	3.1111	7.5577	0.694449	0.992744	0.421774	0	0	0.532913	0
cra_locus_10389_iso_1_len_1221_ver_3	Calmodulin	0.680848	3.48325	2.555	2.77458	0.780145	1.28951	1.36237	4.61266	3.20281	2.80106	1.30586	2.47677	0.712065	0.957366	4.8669	0.500483	2.93497	3.56519	5.02879	2.38971	0	1.82451	2.38226
cra_locus_1038_iso_9_len_4639_ver_3	Phototropin-2	25.9961	4.54302	6.9067	8.69243	28.0392	18.9252	7.88826	3.66752	4.89685	4.6675	3.5607	6.98451	212.241	160.708	0.68875	16.1761	0	0.221243	0.516981	0.393211	0.309325	0	0
cra_locus_10390_iso_1_len_496_ver_3	Subtilase	0	0	0	0	0	0	0	0	0	1.324	0	0	0	0	1.34851	4.59887	0	0	0	0	0	0	0
cra_locus_10391_iso_1_len_405_ver_3	Xylem serine proteinase 1	0	2.11109	0	0	0	0	0	1.82789	0	1.80888	0	0	0	0	1.67928	6.34656	0	0	0	0	0	0	0
cra_locus_10393_iso_7_len_1254_ver_3	14-3-3 g-1 protein	297.175	414.626	288.393	203.208	266.317	261.04	253.912	763.023	557.787	811.266	476.644	336.499	139.817	178.885	321.67	238.531	271.11	373.138	254.246	307.28	297.743	337.448	309.053
cra_locus_103945_iso_1_len_286_ver_3	Gene of unknown function	0	0	0	0	0	0	0	0	0	0	0	0	0	0	0	0	0	0	0	0	0	0	0
cra_locus_103946_iso_1_len_280_ver_3	Gene of unknown function	0	0	0	0	0	0	0	0	0	0	0	0	0	0	0	0	0	0	0	0	0	0	0
cra_locus_10394_iso_5_len_1194_ver_3	Serine/threonine-protein kinase PBS1	4.64418	1.10064	0.891208	0.924286	3.64903	1.89992	4.38098	2.35978	1.63852	1.0084	0	0	5.2214	5.45804	1.66006	3.94304	5.09811	0.80252	1.61179	3.22308	0	3.13961	0
cra_locus_10395_iso_1_len_551_ver_3	Gene of unknown function	1.55473	3.39218	3.8454	3.38892	5.08994	14.2519	1.11108	6.45154	4.7698	6.69228	18.1628	5.30227	7.04608	3.34941	3.17695	4.45718	13.8718	17.7478	19.7846	16.6189	19.3326	7.19636	16.7583
cra_locus_103962_iso_1_len_591_ver_3	Cellulose synthase	0	0	0	0	0	0	0	0	0	0	0	0	5.66358	0	0	0	0	0	0	0	0	0	0
cra_locus_103967_iso_1_len_316_ver_3	Multicopper oxidase	0	0	0	0	0	0	0	0	0	0	0	0	0	0	3.01263	0	18.71	21.6187	14.3435	0	6.11521	8.26665	6.06422
cra_locus_10396_iso_1_len_2323_ver_3	Rop guanine nucleotide exchange factor	0.566048	1.96965	1.62935	2.78285	10.8583	7.39733	20.0238	1.70773	4.37765	2.99182	1.60383	2.57394	2.77501	12.837	4.25585	7.20365	5.07171	2.66765	5.66684	9.31299	0.71725	11.3766	2.51565
cra_locus_10397_iso_2_len_1995_ver_3	Nodulin family protein	68.2501	55.3447	47.9344	45.4206	14.6632	26.7075	13.3933	59.989	49.1804	41.1996	107.462	61.6159	12.808	18.4887	9.7332	17.1751	8.40088	13.9207	17.9633	13.8304	26.837	4.32429	11.1823
cra_locus_10398_iso_5_len_2242_ver_3	Protoporphyrinogen oxidase, mitochondrial	44.1786	16.6099	14.2938	13.6936	32.3565	32.6171	39.0236	20.249	17.0639	14.1655	16.6253	12.1734	31.898	34.2379	38.0148	25.6369	44.4117	46.5874	44.7096	31.0094	21.5616	36.6743	24.0905
cra_locus_103994_iso_1_len_314_ver_3	Gene of unknown function	0	6.64153	4.37161	6.20708	0	0	0	2.65269	7.28022	12.8001	10.1786	9.06409	0	0	0	0	0	0	0	0	0	0	0
cra_locus_10399_iso_1_len_2055_ver_3	AtGRF7	0.587514	0.42193	0.341644	0	15.9011	10.7429	59.7731	0	0	0	0	0	4.78295	20.0015	1.98974	13.8691	0	0	0	0	0	0	0
cra_locus_1039_iso_1_len_991_ver_3	Mitochondrial glycoprotein	5.96164	1.07901	0	0	9.18333	8.30859	6.63181	0.857322	0	0.899826	0	0.959039	5.36738	9.2169	5.62231	6.07739	5.75103	4.24087	4.05397	4.0378	0	8.73462	1.4283
cra_locus_103_iso_6_len_2977_ver_3	Protein kinase; Calcium-binding EF-hand	49.6266	12.7794	12.491	13.6452	42.2021	34.3916	28.8024	12.5194	19.2565	15.7514	11.9763	10.4214	53.7447	50.1791	48.3621	49.3167	56.5216	36.0966	39.9076	43.7452	27.8694	55.6313	31.2589
cra_locus_10400_iso_1_len_1767_ver_3	UDP-galactose:solanidine galactosyltransferase	1.99235	12.3664	7.40759	4.07139	4.70088	8.38413	4.37156	14.7897	4.20225	7.22191	13.1086	5.73304	0	0	10.5562	0.514882	9.59657	7.38442	14.0868	5.7364	2.90323	8.64558	6.27192
cra_locus_10401_iso_1_len_1867_ver_3	Dehydroquinate dehydratase/ shikimate dehydrogenase	7.03538	14.2516	11.4483	14.8555	13.1908	14.5848	12.4011	12.1902	16.1654	20.2178	13.9736	15.5606	2.30898	4.10357	13.5028	4.0897	11.7747	8.23121	12.9667	11.9053	20.2315	16.7269	26.9123
cra_locus_10403_iso_4_len_3081_ver_3	U3 small nucleolar RNA-associated protein	20.6172	36.0514	32.0458	35.206	28.7285	28.7474	25.5595	31.7296	27.3566	29.477	31.598	37.5447	17.2658	21.809	32.7147	27.1118	16.8212	25.398	17.7475	22.4848	24.4398	20.7298	22.4502
cra_locus_104044_iso_1_len_310_ver_3	Gene of unknown function	4.23596	0	5.17281	3.01086	0	3.28204	0	3.17962	3.24889	4.18074	6.79839	5.90986	4.02743	2.94098	3.69374	0	0	0	7.45338	0	0	0	0
cra_locus_10404_iso_1_len_1571_ver_3	Polygalacturonase	4.63153	0	0	0	0	4.06701	6.84544	0	0	0	0	0	0	0	0	0	0	0	0	0	0	0	0
cra_locus_10405_iso_1_len_1266_ver_3	Transferase, transferring glycosyl groups	7.78538	4.56581	4.28054	4.04155	8.69861	7.28143	5.3918	26.3074	4.126	2.44912	1.65873	1.49167	4.83165	8.69668	15.86	20.5924	19.9613	13.7075	4.69982	6.69898	2.39424	21.2575	5.62791
cra_locus_10406_iso_1_len_1255_ver_3	Galactinol synthase 4	6.13401	4.35776	25.8576	43.2561	5.03636	5.08716	6.03157	6.33456	26.3673	14.5748	7.70434	24.8333	5.64393	3.5845	6.56357	5.47423	0.729986	1.24787	1.47269	2.74588	2.86307	1.93518	1.19545
cra_locus_10407_iso_1_len_3221_ver_3	Transferase, transferring glycosyl groups	14.1025	17.8281	19.321	20.7465	9.94692	15.6791	15.9713	11.4332	10.1403	9.12354	46.7479	30.0017	5.93864	12.0725	7.62392	8.82155	8.99754	9.26628	10.4077	7.99101	28.3851	7.68049	14.033
cra_locus_10408_iso_3_len_3450_ver_3	Pentatricopeptide repeat-containing protein	9.50232	11.4107	9.00699	10.5587	9.51434	12.3297	7.97042	7.96251	14.7775	12.8081	7.14086	8.71308	7.89027	7.67323	18.1581	10.658	14.3617	8.75864	16.5464	9.8332	6.14343	9.70318	6.72103
cra_locus_10409_iso_1_len_2885_ver_3	ATP binding protein	25.0443	33.8648	28.9859	23.3488	33.5142	39.5682	24.0644	38.9607	37.3998	43.602	26.2849	25.8753	29.6449	36.9364	38.9767	39.7091	57.3738	43.8065	74.623	73.5345	54.8842	75.6299	52.1193
cra_locus_1040_iso_3_len_2322_ver_3	EMB1692	18.6877	15.2582	16.21	12.2431	36.2101	33.2221	42.7715	23.8587	12.4872	13.0781	12.6202	12.2718	37.8491	52.3401	9.43131	15.5844	9.47369	8.63656	8.44097	7.28424	6.60158	8.57925	7.5103
cra_locus_10411_iso_5_len_2494_ver_3	Protein kinase MK6	19.2933	5.18939	4.68936	7.08294	15.2653	12.9951	11.3879	6.134	12.6764	10.372	4.79345	5.80131	11.6786	12.5606	19.4317	14.5211	18.1204	22.4812	15.5575	15.9682	10.8579	17.2846	11.557
cra_locus_10412_iso_2_len_932_ver_3	By genscan and genefinder	37.0285	1.41998	2.22292	1.44799	20.7436	11.575	14.3872	2.43557	10.202	6.16255	2.74239	1.12387	12.2194	17.114	58.8449	31.051	5.85649	30.4962	4.71874	15.0557	4.13013	9.30532	4.66631
cra_locus_104136_iso_1_len_514_ver_3	Origin recognition complex subunit 5	1.11556	0	0	0	2.32826	3.54957	5.9792	0	2.90909	3.95208	0	0	0	3.04391	2.1239	2.58311	3.52281	2.27819	2.82926	6.67416	0	5.50329	1.88869
cra_locus_10413_iso_5_len_1397_ver_3	Exostosin-2	17.8372	8.65899	6.57765	5.34124	23.7921	21.9327	17.6793	11.1031	9.16094	8.40683	6.8271	7.75574	14.529	12.8238	27.6331	31.3988	20.459	27.9586	30.2503	32.9376	22.9326	28.616	16.4722
cra_locus_10414_iso_2_len_1979_ver_3	Basic helix-loop-helix protein BHLH7	6.99199	4.25849	4.47249	4.37817	36.3457	18.6027	10.3207	7.93023	3.31978	7.80021	11.3206	7.28614	86.5104	78.6252	5.41622	15.3886	12.1832	3.18183	7.03689	5.77674	2.8126	13.8904	0.704628
cra_locus_10415_iso_1_len_2354_ver_3	Pentatricopeptide repeat-containing protein	6.65546	7.66852	8.66331	10.3544	6.7138	7.32514	5.66262	9.81416	8.35299	11.6481	7.51662	8.57121	6.32783	7.60394	10.058	9.44258	7.31367	6.47052	7.2376	5.4576	7.07687	5.91006	6.65836
cra_locus_10416_iso_6_len_1285_ver_3	Transcription factor	5.47078	6.80597	8.76236	7.5934	4.70678	5.48261	4.47916	7.66084	11.9602	9.3534	6.70357	7.93314	5.12468	5.19079	6.8816	5.88977	6.80161	8.12046	10.5801	9.07176	4.80337	7.3197	4.23001
cra_locus_10417_iso_4_len_2511_ver_3	FHY3 (FAR-RED ELONGATED HYPOCOTYLS 3); transcription factor	62.9114	19.4347	20.8878	24.9768	48.3058	51.5006	46.221	13.9285	14.1779	17.9364	16.7904	21.2249	62.9234	66.2606	52.8875	60.3066	28.7809	42.6683	0	0	0	24.6541	25.7976
cra_locus_104185_iso_1_len_317_ver_3	Gene of unknown function	0	16.9609	22.5917	25.905	0	0	0	17.4208	17.0023	18.034	16.7057	17.2987	0	0	0	0	0	0	0	0	0	0	0
cra_locus_10418_iso_2_len_1260_ver_3	GDP-L-fucose synthase 2	8.96617	11.2099	7.30969	8.62234	16.1878	19.429	26.3371	10.7197	15.9112	11.6529	4.77055	6.67027	11.0896	12.3147	14.4596	22.0505	19.1669	16.7779	14.5497	23.0348	16.2176	24.4127	12.3525
cra_locus_104191_iso_1_len_331_ver_3	Aquaporin TIP2;2	0	0	0	0	0	0	0	0	0	0	0	0	16.629	0	0	0	0	0	0	0	0	0	0
cra_locus_104192_iso_1_len_332_ver_3	Gene of unknown function	6.42828	4.03031	8.45226	6.34602	12.0571	8.7254	2.8712	3.62924	0	4.8975	4.67021	8.52563	7.9369	13.8009	6.65204	7.08803	11.0091	8.97628	9.77243	0	0	3.58881	0
cra_locus_10419_iso_4_len_1774_ver_3	Conserved gene of unknown function	14.3866	8.18789	9.7975	10.1817	13.8557	12.2967	15.5881	7.12888	8.13298	10.7717	10.9476	8.77655	14.0248	13.8395	13.9966	8.71788	11.6562	13.3945	12.6231	8.60718	6.34891	9.00745	8.60898
cra_locus_1041_iso_9_len_2851_ver_3	Uridine cytidine kinase I	58.7061	21.7883	21.4617	27.2006	21.6313	28.4977	20.3261	16.9021	26.3806	22.5019	14.9681	20.1062	23.8112	21.7647	33.3954	31.1184	26.0053	29.3052	25.9759	26.9786	21.4174	24.311	23.3062
cra_locus_10420_iso_8_len_2084_ver_3	Pentatricopeptide repeat-containing protein	4.44949	8.73549	9.12791	10.2552	5.52723	4.84688	4.31811	8.0267	6.6234	7.31139	8.67636	8.57497	4.78429	4.5139	4.36522	4.90615	4.15709	3.76373	5.4473	3.21334	3.57632	3.46354	3.16483
cra_locus_10421_iso_1_len_1194_ver_3	Transposon Tdc1 DNA	1.57902	2.3061	1.12886	2.5748	0	0.686083	0.89611	1.17989	1.781	2.12295	1.15392	2.37578	0.667854	0.839699	1.31828	0.614499	1.04756	0.729563	0.61992	0	0	0	0
cra_locus_10423_iso_5_len_1843_ver_3	GDSL-motif lipase/hydrolase family protein	5.39854	6.5637	6.29594	6.02082	5.45598	5.11798	23.276	6.40306	8.87593	8.82812	5.14855	4.67909	5.80983	7.29895	5.16593	3.97937	7.0865	13.213	4.9368	5.13918	4.77708	5.61306	4.49424
cra_locus_10424_iso_2_len_1232_ver_3	Gene of unknown function	11.2212	8.53177	9.0846	6.96165	16.1225	13.2115	9.42525	7.72525	4.7942	6.10047	8.9096	8.81876	8.58396	8.74039	14.0175	15.1252	8.08184	15.9673	5.82328	5.16623	4.96929	6.28602	7.15739
cra_locus_104259_iso_1_len_447_ver_3	Gene of unknown function	3.36536	11.2478	14.4064	9.56823	6.03852	4.70688	4.99506	10.8519	7.54495	5.17723	19.9735	21.8509	4.5688	12.5785	5.75974	5.70886	5.44997	12.6068	4.83775	0	0	0	0
cra_locus_10425_iso_4_len_1235_ver_3	Protein translocase	40.3767	27.34	38.0522	25.5742	63.6699	56.6913	49.8227	53.1137	40.0521	43.4252	37.0782	30.8297	38.7676	46.4542	29.3326	25.1789	30.6281	47.1485	30.7207	29.954	34.199	29.755	27.3438
cra_locus_104261_iso_1_len_278_ver_3	Gene of unknown function	4.34576	10.7896	5.97625	9.72969	8.53639	12.593	14.2084	6.90047	4.66636	4.22139	11.9343	11.3004	6.81752	7.42932	4.87453	6.22931	8.1687	15.7017	6.0909	8.83991	9.91136	7.54318	11.7721
cra_locus_10426_iso_1_len_1660_ver_3	PP1A protein	14.7619	24.5959	27.1182	27.1155	16.3718	14.1363	11.2369	23.8507	29.8699	29.835	25.9415	28.2266	13.7474	18.0041	25.8978	16.7158	14.3663	18.6299	13.616	17.3062	12.3748	20.2438	17.0735
cra_locus_10427_iso_2_len_398_ver_3	Gene of unknown function	0	94.1537	58.3375	64.6159	0	0	0	84.188	71.7486	104.895	64.2343	65.2567	0	0	0	0	0	0	0	0	0	0	0
cra_locus_104285_iso_1_len_370_ver_3	Gene of unknown function	1.58665	0	0	3.15775	0	2.16365	1.70083	0	0	2.17587	0	0	2.28167	2.09369	3.53984	2.97413	4.05608	3.24025	6.14193	0	0	0	0
cra_locus_104293_iso_1_len_279_ver_3	Alcohol dehydrogenase	0	0	0	0	0	0	0	0	0	0	0	0	0	0	0	0	0	0	0	0	0	0	0
cra_locus_10429_iso_5_len_1969_ver_3	Receptor ser thr protein kinase	5.74514	17.8457	12.1308	14.1934	17.4619	16.9555	14.081	16.1194	11.3369	14.151	16.5578	14.1243	5.94293	6.62791	17.24	15.2834	18.9561	20.9857	27.362	17.9535	23.0126	14.2168	16.9038
cra_locus_1042_iso_1_len_3362_ver_3	Pentatricopeptide repeat	4.48032	8.53694	8.43149	10.4075	6.65633	6.86226	28.538	6.63985	8.71529	8.03264	6.55952	10.2142	6.59994	6.04879	10.126	11.0437	6.81053	4.53914	5.9588	5.36096	3.58727	4.77519	3.68276
cra_locus_10430_iso_2_len_1015_ver_3	Armadillo repeat-containing protein	0	1.11467	1.404	1.01408	3.23361	1.8707	2.82344	1.18498	0.841729	0	0	0	1.21951	3.80618	2.07844	2.48069	1.32025	0	0.805707	0	0	0	0
cra_locus_10431_iso_3_len_1743_ver_3	Gene of unknown function	16.667	28.6059	39.3334	37.3351	14.1451	14.3127	12.7569	21.8937	39.0762	27.8131	24.4377	28.2592	19.1067	19.5368	14.1842	16.6373	16.2341	12.0003	12.43	11.709	10.9436	15.3416	13.6815
cra_locus_10432_iso_1_len_1852_ver_3	Aluminum-activated citrate transporter	14.6911	2.1771	2.3161	2.44707	3.7894	1.45024	1.17714	1.96044	2.00316	3.15429	1.43603	2.58104	6.94514	3.72071	9.15918	13.6136	5.0878	2.70415	5.86322	5.96611	4.09162	6.39875	1.45718
cra_locus_10433_iso_4_len_2281_ver_3	Kelch	12.5411	24.5376	20.2857	22.0632	14.3348	14.4699	11.8984	26.2463	25.3553	30.2565	15.0807	21.3033	9.54817	10.5482	14.6698	15.4442	13.8731	19.0973	14.6879	14.7762	11.1542	12.2911	10.535
cra_locus_10434_iso_1_len_1295_ver_3	Epoxide hydrolase	0.6069	11.4203	11.8415	8.69118	8.36824	22.2796	13.2148	5.96347	8.54899	6.81999	31.7783	9.24425	0	0.608194	15.9629	1.86386	37.6233	32.3689	63.8092	68.884	107.458	36.1529	97.3061
cra_locus_104356_iso_2_len_460_ver_3	Gene of unknown function	0	18.2753	21.5199	7.67354	0	0	0	89.4589	9.05044	20.8016	20.356	12.6295	0	0	0	0	0	0	0	0	0	0	0
cra_locus_10435_iso_3_len_3534_ver_3	GHMP kinases putative ATP-binding protein	16.3626	14.8946	14.0607	15.2292	20.0503	19.8046	21.4122	16.0203	12.313	13.8304	10.2951	12.0293	15.0545	14.7499	14.8714	22.212	16.7131	17.8476	14.3617	22.6449	15.6166	24.7632	17.3272
cra_locus_10436_iso_2_len_1695_ver_3	Conserved gene of unknown function	18.4463	11.0684	17.5743	13.8962	7.25638	12.0679	6.68407	10.4372	8.56846	8.27628	43.4884	13.6783	6.83543	8.47058	11.8321	7.16178	12.9903	16.0193	12.8749	9.40392	8.82273	9.73126	10.3368
cra_locus_104376_iso_1_len_371_ver_3	Gene of unknown function	2.37301	3.57072	0	0	0	3.59553	0	0	0	1.80792	0	3.23718	2.06818	1.92691	4.03352	1.74438	3.09264	2.73373	3.80109	0	0	0	3.74978
cra_locus_10437_iso_7_len_2301_ver_3	SAM (And some other nucleotide) binding motif; Methyltransferase small	7.4775	15.8023	12.0947	16.4525	8.2445	9.47151	11.2576	14.8529	14.2099	15.621	12.2075	11.9385	5.91507	6.49272	8.29449	9.97795	8.73763	9.27753	9.12295	8.7193	9.02831	8.74556	8.42639
cra_locus_104382_iso_1_len_458_ver_3	Gene of unknown function	0	11.8133	10.1648	7.53002	0	0	0	24.3514	17.0245	29.9786	12.6994	28.3875	0	0	0	0	0	0	0	0	0	0	0
cra_locus_10438_iso_1_len_1926_ver_3	Diphenol oxidase	0	0	0	0	5.11221	2.43082	0	0	0	0	0	0	0	0	20.7511	14.9065	1.50111	0	1.02792	0	3.64289	0.583943	4.78048
cra_locus_10439_iso_3_len_1832_ver_3	Enoyl-CoA hydratase/isomerase family protein	11.5231	28.3453	25.2222	22.7371	17.9783	17.9711	21.4236	26.4165	29.6902	24.4854	14.2057	17.8072	10.749	18.2687	21.1366	17.4705	16.3352	21.3075	15.6218	17.2351	12.8977	19.2995	11.0755
cra_locus_1043_iso_3_len_2410_ver_3	Ubiquitin-protein ligase	12.3162	13.6685	14.8551	16.6361	13.4187	13.4277	10.0114	13.1049	9.58567	8.82928	12.9264	18.3667	15.1207	15.3961	17.3297	17.4889	19.1355	17.2773	12.6788	13.2687	10.6881	13.6596	11.3492
cra_locus_104405_iso_1_len_1509_ver_3	FH protein NFH1	26.3212	15.9662	15.8641	9.77013	34.2665	33.4421	31.6639	29.7437	54.5072	24.231	6.57334	7.9792	14.3375	27.6255	37.2079	38.6565	77.1823	48.7568	57.191	58.834	15.6385	50.6633	13.1213
cra_locus_10440_iso_2_len_3082_ver_3	Binding protein	15.0104	25.0397	19.8605	27.1579	15.9696	15.6478	19.1301	19.09	30.1477	28.0092	14.6467	17.4668	12.9972	9.92444	20.4772	23.3315	18.8144	14.922	17.9783	17.982	21.773	16.5784	20.2826
cra_locus_10441_iso_1_len_1298_ver_3	Ribosomal protein L2	19.2713	16.3113	17.6725	16.1222	34.756	31.3474	34.7806	22.5846	18.247	20.1231	16.5594	21.52	20.0658	26.0723	27.7362	21.6723	30.9028	44.3389	36.1957	29.8954	22.4742	37.1584	22.5936
cra_locus_104427_iso_1_len_347_ver_3	Gene of unknown function	0	0	0	0	4.1776	5.607	0	5.61932	3.13187	5.63867	6.89737	5.80249	0	3.28487	0	0	0	5.07827	5.67773	0	16.9021	0	7.7775
cra_locus_104429_iso_1_len_281_ver_3	Gene of unknown function	16.8364	9.28234	14.4938	11.6731	28.302	34.0368	23.3007	13.5656	16.2319	12.4408	17.1506	14.3232	16.2084	21.8912	11.7984	14.3675	23.3822	33.7021	15.7407	5.64697	3.39992	6.5918	5.74548
cra_locus_10442_iso_1_len_814_ver_3	Conserved gene of unknown function	2.20554	1.94456	5.11413	0	86.1394	69.9425	78.5377	0	2.64314	1.33901	1.35198	1.64539	14.7771	157.485	18.5887	32.2987	56.9003	43.2008	84.9168	50.1421	3.07416	47.098	4.90098
cra_locus_104439_iso_1_len_276_ver_3	Gene of unknown function	0	3.95526	2.80231	0	0	0	0	0	3.3601	5.00655	2.86452	6.72337	0	0	2.57443	0	0	0	0	0	0	0	0
cra_locus_10443_iso_2_len_1266_ver_3	Nodulin MtN3 family protein	18.1515	0	0	0	0	0.745557	65.2187	0	0	0	0	0	0	1.40556	0	1.10924	0	0	0	0	0	0	0
cra_locus_104442_iso_1_len_433_ver_3	Ocp3 putative	0	0	0	0	0	0	0	0	0	0	0	0	0	0	0	0	0	0	0	0	0	0	0
cra_locus_10444_iso_1_len_1468_ver_3	WD-repeat protein	24.7024	34.1575	27.0327	31.268	32.3118	28.4132	39.579	36.2509	35.0665	33.9017	25.076	28.3382	26.4937	32.3401	28.8321	34.6586	24.5946	25.6341	28.3563	34.1917	31.3295	30.639	32.0829
cra_locus_10445_iso_2_len_1821_ver_3	EMB2759	12.7714	14.7196	11.2014	14.1209	16.2723	13.2094	20.034	14.4975	12.0416	12.9734	9.23903	8.95824	15.5515	17.715	12.3924	13.1167	11.1689	10.6717	11.6472	10.6936	12.3036	9.15736	8.48542
cra_locus_104462_iso_1_len_579_ver_3	Polygalacturonase	42.3984	4.66271	2.51699	0	6.88392	7.04267	3.26899	0	0	0	0	0	0	0	2.07844	0	9.76323	44.197	8.66648	15.0666	0	16.7155	4.99645
cra_locus_10446_iso_2_len_1201_ver_3	UPF0497 membrane protein	11.3564	7.03328	7.2052	5.7751	18.4762	16.7349	8.46219	7.97534	8.8518	6.54184	5.31256	6.06142	7.24216	6.77004	27.1297	16.7978	19.2988	39.0161	13.9265	16.682	12.4479	21.1712	12.5835
cra_locus_10447_iso_1_len_1587_ver_3	DNA polymerase epsilon subunit	10.7307	10.3464	20.6585	8.49113	15.1351	13.3385	7.1474	19.7187	9.16242	10.2787	20.1634	15.574	7.26386	25.6806	6.05397	6.96899	14.7263	16.0387	17.8929	13.0476	9.85675	13.4514	7.70207
cra_locus_104484_iso_1_len_417_ver_3	Gene of unknown function	0	0	0	0	5.13586	33.1187	39.4627	0	0	0	0	0	0	0	0	0	0	0	0	0	0	0	0
cra_locus_10448_iso_2_len_3131_ver_3	DNA binding protein	13.6919	12.1843	13.7006	12.1743	8.82224	8.2652	6.35699	10.3691	10.6218	10.3849	11.0852	13.5028	10.5573	10.7983	11.9054	10.3083	12.747	10.6585	12.6654	10.3934	6.93086	9.56048	8.38648
cra_locus_10449_iso_3_len_2461_ver_3	Spindle assembly checkpoint component mad1	13.0812	23.7006	25.3303	25.0476	19.2552	19.3653	22.7271	31.1709	31.9761	44.7715	20.4813	24.2409	11.5463	19.019	15.402	14.1785	16.1918	15.2025	19.4212	17.8353	14.7939	20.2832	16.309
cra_locus_1044_iso_8_len_2357_ver_3	MdVOZ1 protein	117.483	59.879	69.6037	68.7533	92.2743	96.2134	83.6838	43.3687	46.0605	44.089	69.2644	65.5487	95.1902	76.5469	91.088	125.594	54.6595	84.7751	49.419	82.7596	76.8029	96.3075	97.8186
cra_locus_10450_iso_3_len_709_ver_3	NAC domain protein	15.2766	10.2364	11.7058	8.48314	12.3079	12.9296	8.35856	15.1607	17.8194	16.1851	9.15635	7.05514	5.72095	7.93671	18.3757	12.8088	12.0844	21.2485	23.5779	8.94927	8.06555	8.57715	9.02546
cra_locus_104510_iso_1_len_339_ver_3	Gene of unknown function	2.7925	0	0	0	7.71373	6.14836	3.74182	0	0	2.194	0	3.27373	0	3.37103	3.34253	0	10.2356	4.93514	3.96049	0	0	0	0
cra_locus_104512_iso_1_len_306_ver_3	Gene of unknown function	0	34.1667	35.4832	56.6441	0	0	0	25.308	38.9505	35.0449	34.7382	49.2939	0	0	4.58097	0	0	0	0	0	0	0	0
cra_locus_10451_iso_1_len_1400_ver_3	Chloroplast FtsZ	23.9545	11.9357	9.7944	10.3786	71.1718	51.4381	82.7881	15.9916	24.2748	18.8514	7.7927	7.80606	83.8876	103.831	16.6264	32.1568	17.6844	23.9918	18.0157	18.7938	16.2417	20.8382	12.9619
cra_locus_104520_iso_1_len_329_ver_3	Basic helix-loop-helix family protein	0	0	0	0	0	0	0	0	0	0	0	0	0	0	0	0	0	0	0	0	0	0	0
cra_locus_10452_iso_1_len_1255_ver_3	Zinc finger protein	1.32393	58.9675	85.7593	45.4206	28.2274	19.0068	3.78455	69.962	80.6252	47.8609	20.6605	48.5378	0.576932	1.19662	80.2943	24.6708	67.6896	56.9863	49.718	76.6734	24.7835	23.5447	18.3801
cra_locus_104534_iso_1_len_400_ver_3	Calcineurin-like phosphoesterase family protein	0	0	0	0	4.476	5.80034	0	0	0	0	0	0	23.8315	18.3337	0	0	0	0	0	0	5.91329	0	7.16024
cra_locus_10453_iso_3_len_756_ver_3	Gene of unknown function	27.6455	50.8919	47.1736	45.2782	50.1118	42.4518	43.5958	37.3407	52.7952	36.9092	35.5693	50.7585	17.1704	26.0052	28.0405	33.6002	33.5141	35.0699	18.8733	24.577	25.7242	35.8292	30.1124
cra_locus_104542_iso_1_len_289_ver_3	Gene of unknown function	15.399	19.7268	21.83	15.9744	19.1607	20.5734	17.8456	18.2395	14.6836	11.1771	15.7835	16.6777	15.5066	26.3142	21.9886	19.274	19.0884	17.3257	13.0553	15.9358	15.6099	14.4481	11.2741
cra_locus_10454_iso_5_len_1771_ver_3	Zinc finger family protein	16.2749	13.705	13.6686	14.3937	25.3951	25.4476	31.2631	11.0471	15.8652	10.8612	9.86976	11.122	15.6731	17.0099	29.3132	28.8699	20.0365	22.2	15.2153	19.5482	21.7556	22.5858	28.2903
cra_locus_10455_iso_1_len_1985_ver_3	Pentatricopeptide repeat-containing protein, mitochondrial	4.59171	1.96663	2.93713	2.20203	4.68634	2.76613	1.98665	3.4786	1.52751	2.37082	2.13418	2.78288	9.79975	12.5924	0.928958	1.70799	0.499142	0.43453	0.590762	0	0.729033	1.16241	0.515142
cra_locus_104561_iso_1_len_324_ver_3	Gene of unknown function	0	0	0	0	0	0	0	0	0	0	0	0	4.79538	0	0	0	0	0	0	0	0	0	0
cra_locus_10456_iso_1_len_1164_ver_3	Peptidyl-tRNA hydrolase	8.15146	5.86384	5.48858	4.13369	8.01767	9.15483	9.91335	7.87201	11.7728	12.9109	9.22602	3.90172	5.35941	7.23116	6.21508	4.88825	7.38335	8.98616	5.4086	5.70391	8.50472	6.3581	6.53721
cra_locus_104577_iso_1_len_286_ver_3	Gene of unknown function	3.36839	3.56377	0	0	0	0	2.70809	0	0	0	0	0	0	3.00633	3.14652	2.78557	0	0	2.81014	0	0	0	0
cra_locus_10457_iso_8_len_2240_ver_3	Molybdopterin cofactor synthesis protein A	9.47016	20.4912	20.5053	21.3244	7.9312	9.00981	5.45619	16.0398	14.7521	18.0095	25.6006	19.6119	6.36618	6.52507	9.62784	4.64094	4.96772	6.61194	5.97756	5.38763	7.24331	4.51578	6.71166
cra_locus_10458_iso_6_len_1300_ver_3	Conserved gene of unknown function	26.4137	12.9229	10.5106	8.71408	11.053	14.488	11.1341	20.8725	23.181	22.1589	13.5829	7.73055	5.89869	7.52285	10.155	8.68345	21.7002	35.1744	21.734	20.5778	19.3317	15.7499	19.5671
cra_locus_10459_iso_1_len_2140_ver_3	ATEXO70D1	6.20244	12.611	12.0663	12.5336	4.27931	4.68918	3.29691	7.84633	12.6595	12.5361	10.0885	10.6201	4.89192	4.00844	12.6668	10.9085	10.9071	9.94484	11.3925	9.32296	4.15695	8.10136	2.64695
cra_locus_1045_iso_1_len_4064_ver_3	Conserved gene of unknown function	19.1478	28.57	26.0057	28.0016	15.3919	17.2337	11.1828	24.9535	29.9274	33.3136	23.4443	26.1116	13.4802	14.69	27.8128	19.8563	22.8252	20.5376	26.1498	21.3712	21.7208	21.78	22.5429
cra_locus_10460_iso_1_len_2361_ver_3	Yth domain-containing protein	166.363	295.87	334.495	369.493	180.885	168.948	165.166	244.853	219.434	228.088	298.594	353.399	280.043	287.29	269.752	281.384	135.594	185.449	146.733	152.465	129.682	143.493	129.703
cra_locus_10461_iso_1_len_920_ver_3	Nodulin	0	0.822347	0	0	13.8662	8.34962	5.59803	0	0	0.763344	0	0	1.74646	1.22153	44.1081	59.8585	4.7483	2.2894	16.9407	24.7041	0	9.20875	2.26177
cra_locus_10462_iso_4_len_986_ver_3	GTP-binding protein	17.4695	26.0634	19.3837	19.9317	29.6374	29.1678	29.4536	38.2065	33.4753	31.4	23.3257	17.2565	17.1471	22.0548	36.0528	29.5483	41.8278	43.696	39.1667	35.9889	20.8606	33.8297	22.1585
cra_locus_10464_iso_1_len_1949_ver_3	GRAS family transcription factor	13.6389	19.8125	19.6115	16.865	19.3736	22.2238	14.862	12.9224	17.4202	14.7814	6.11724	13.887	17.7566	17.2373	33.036	26.6906	16.7805	39.841	13.5038	12.6107	12.4546	14.4164	14.933
cra_locus_10465_iso_2_len_2176_ver_3	HAT family dimerisation domain containing protein	1.48681	4.9826	5.10969	5.46301	2.30484	2.83506	4.24114	3.21704	5.75975	4.72299	3.74016	4.53343	3.75567	4.82529	1.66581	2.38964	2.57685	1.02927	2.75831	1.62828	1.14948	2.07196	1.5786
cra_locus_10466_iso_2_len_1272_ver_3	Pirin	5.91974	0.638592	1.22508	0	36.7121	19.0436	9.65859	0.774096	5.20802	2.53691	1.36612	0.816456	3.30044	3.75913	32.0701	11.4708	77.3675	120.619	180.871	122.187	6.08907	97.7419	6.55877
cra_locus_10467_iso_3_len_3348_ver_3	Erecta	5.64032	0.717479	0.646499	0.880604	20.5135	19.5806	44.7525	1.51166	2.92569	3.2974	0.255813	0.361366	17.8375	35.8909	1.12796	13.9483	0.465756	0.819467	0.89215	1.7165	0.72709	1.04246	0.441587
cra_locus_10468_iso_3_len_722_ver_3	Gene of unknown function	56.5639	0	0	0	14.2816	5.14581	10.2941	0.991756	0	0.981443	0	0	1.42893	3.38212	1.97572	0.86086	6.45716	6.37763	10.5257	3.9236	0	4.85005	0
cra_locus_10469_iso_3_len_2025_ver_3	Ribosomal protein S6 kinase	153.505	28.6636	31.6609	48.0904	23.9272	24.0883	43.0337	33.5379	112.766	86.365	38.6734	37.2551	38.9096	40.9592	48.6439	40.7979	63.3436	45.3075	75.8389	43.138	74.5748	34.1734	46.6728
cra_locus_1046_iso_2_len_2477_ver_3	Uroporphyrinogen decarboxylase, chloroplastic	18.5874	11.3488	12.4975	12.1592	62.3266	39.7584	59.1591	7.18731	5.08545	4.49587	12.6593	14.0575	74.3435	111.218	11.244	20.5439	9.97061	11.5617	8.67356	7.35194	8.28959	9.08597	8.02633
cra_locus_10470_iso_6_len_2505_ver_3	RING zinc finger protein	19.2295	9.59291	8.16293	5.68466	31.6559	27.3895	18.9501	14.4619	6.10056	5.21917	5.14364	3.94972	27.4529	39.9449	14.9444	35.4669	25.1704	12.2548	18.0843	18.7734	8.52806	23.3763	13.2445
cra_locus_104715_iso_1_len_310_ver_3	Gene of unknown function	1.92543	2.39022	3.20222	0	3.54575	0	0	0	0	3.30058	0	0	3.02058	4.31343	2.4625	2.12305	0	3.0247	0	0	0	0	3.25985
cra_locus_10471_iso_1_len_1861_ver_3	Protein tipD	10.0413	14.7649	9.63448	13.8965	7.43279	7.75257	6.17339	12.5302	19.0724	18.8328	9.42352	9.16552	7.56738	6.72352	10.3851	8.92259	10.6141	10.2067	11.8265	14.842	12.5139	13.652	12.5502
cra_locus_10472_iso_1_len_1654_ver_3	Pyruvate kinase	1.09874	5.14777	4.13173	4.96982	1.96206	2.308	2.4805	3.38356	15.4753	7.91435	3.09139	4.31491	1.69756	1.73699	3.32133	3.74466	2.85387	1.56912	3.95547	4.54172	1.89007	1.33835	0.845554
cra_locus_104731_iso_1_len_429_ver_3	DC2 protein	0	0	0	0	0	0	0	0	0	0	0	0	0	0	0	0	0	0	0	0	0	0	0
cra_locus_104738_iso_1_len_446_ver_3	Transposon protein	0	12.0065	14.109	10.9743	0	0	0	11.2898	7.36402	12.6774	11.9617	15.4872	5.08862	6.04185	4.81143	0	7.99945	0	0	0	0	0	3.51469
cra_locus_10473_iso_1_len_1400_ver_3	Protein Z	0.907665	9.66438	9.49148	12.6226	0.920534	0.762379	1.1845	3.00782	7.20375	7.17076	13.3663	13.526	0.773871	0.554609	1.2024	2.21921	0	0.619943	0	0	0	0	0
cra_locus_104747_iso_1_len_328_ver_3	Gene of unknown function	0	14.2948	15.0472	16.4632	0	0	0	15.4007	11.9357	12.8211	13.9614	20.9821	0	0	0	0	0	0	0	0	0	0	0
cra_locus_104755_iso_1_len_497_ver_3	Conserved gene of unknown function	0	0	0	0	0	0	0	0	0	0	0	0	0	0	0	0	0	0	0	0	0	0	0
cra_locus_104762_iso_1_len_363_ver_3	Gene of unknown function	18.6289	0	3.52303	0	36.9905	26.8761	10.5925	2.26352	3.23032	2.03635	3.38939	0	10.8004	99.1815	25.1339	9.1094	55.5393	26.9742	33.5156	7.75322	0	13.6148	0
cra_locus_104775_iso_1_len_293_ver_3	Gene of unknown function	0	2.54414	4.71935	3.20474	0	0	0	8.33075	5.97309	13.1156	2.68006	4.89255	0	0	2.18677	0	0	0	0	0	0	0	0
cra_locus_10477_iso_2_len_1623_ver_3	Conserved gene of unknown function	19.5171	12.2769	8.72813	6.65879	18.9187	15.9302	14.5541	22.2053	3.33228	4.65477	9.23259	2.95184	4.393	12.907	31.9365	15.9436	28.6853	50.5486	27.9549	15.9208	10.804	17.1787	9.65438
cra_locus_104780_iso_1_len_279_ver_3	Gene of unknown function	0	0	0	0	0	0	0	0	0	0	0	0	0	2.20873	0	0	4.23073	0	4.33324	0	0	0	0
cra_locus_10478_iso_1_len_2025_ver_3	Glucosyltransferase	29.0311	53.1668	43.8329	24.5461	21.8639	52.2118	36.7574	106.054	11.7257	15.7985	78.304	72.2453	1.59465	1.41332	14.9914	2.51064	47.5281	84.0999	5.13794	2.65963	3.73698	14.3132	66.0395
cra_locus_10479_iso_1_len_2501_ver_3	Ubiquitin	28.6939	4.45838	2.85605	3.57811	6.47578	4.30286	12.341	3.58657	5.10322	5.07754	2.23252	2.46324	1.14453	4.18961	2.64017	4.5612	3.32418	1.9942	8.18033	9.32331	0.443736	7.79805	1.44517
cra_locus_1047_iso_1_len_1454_ver_3	Ring finger protein	8.54285	1.07122	0.874322	0.647695	2.14421	1.63956	1.99432	1.20577	1.74725	1.3017	1.5392	1.87756	1.38982	2.13407	8.89446	2.34444	4.33921	5.90486	6.23378	4.8157	3.23301	3.67672	1.67133
cra_locus_10480_iso_3_len_6187_ver_3	Centromere protein	35.9527	33.0085	22.885	18.4603	70.1451	80.9131	55.8791	39.5318	36.7936	28.7466	21.2215	20.885	57.3045	102.617	23.5368	88.9827	62.4537	28.0047	73.0416	56.0346	26.1849	68.3222	35.3584
cra_locus_10481_iso_4_len_1257_ver_3	Uncharacterized Cys-rich domain	17.4915	11.8837	13.0769	9.26974	14.5505	14.8702	23.0009	8.731	11.4219	15.2563	25.2362	14.8006	11.8654	20.4421	45.0598	15.7403	21.4001	20.6256	29.1118	28.2576	24.5645	31.0734	21.0356
cra_locus_10482_iso_6_len_1366_ver_3	Pterin-4-alpha-carbinolamine dehydratase	29.5411	9.6818	9.9917	8.6866	95.0898	59.4602	62.6398	13.4681	8.93882	8.41677	9.9489	9.66068	90.9938	125.372	15.2224	18.5621	11.3795	12.5234	10.1012	9.87796	9.84516	11.4604	8.76964
cra_locus_104839_iso_1_len_471_ver_3	Gene of unknown function	2.32577	7.0453	6.4206	10.7888	1.80336	2.64296	2.2307	3.88737	6.38419	8.67311	4.32205	7.51435	2.08035	1.36214	2.33289	1.75464	2.76109	0	2.94111	0	0	0	0
cra_locus_10484_iso_4_len_1109_ver_3	Gene of unknown function	156.703	86.7268	56.8478	41.5192	168.95	140.274	107.995	102.775	20.9792	22.4423	52.9342	51.0844	112.778	150.412	138.775	98.3246	248.676	271.588	241.805	132.716	67.0337	144.988	53.2647
cra_locus_10485_iso_2_len_1052_ver_3	Expansin	7.51014	0	0.74427	0	74.1505	46.1578	36.9079	2.28424	0	2.29675	0	0	37.6821	34.8179	0	25.1343	0	0	0	0	0	0	0
cra_locus_10486_iso_1_len_1344_ver_3	Aminobutyrate aminotransferase	5.34201	9.1153	6.80963	6.10626	3.65873	6.88851	5.08812	8.61394	8.29008	8.61767	11.1274	7.6777	1.66527	2.37253	6.73783	3.10414	3.52194	3.25905	7.2117	6.88562	9.16383	4.09178	6.33269
cra_locus_104872_iso_1_len_355_ver_3	RNA binding motif protein	0	0	0	0	0	0	0	0	0	0	0	0	0	0	0	0	0	0	0	0	0	0	0
cra_locus_10487_iso_1_len_4160_ver_3	Multidrug/pheromone exporter, MDR family, ABC transporter family	30.6868	5.80883	3.87053	3.40722	55.2004	214.248	103.024	12.2284	52.6978	21.224	4.53878	5.24836	11.763	10.0201	33.6722	73.0882	18.021	9.75241	21.3638	17.2388	430.269	14.7888	524.287
cra_locus_10488_iso_7_len_1423_ver_3	1-aminocyclopropane-1-carboxylate oxidase	0.756522	0.963425	0.669793	0.882667	2.64451	1.25686	1.4977	0.764141	1.10136	0.68745	0.507076	0.959108	0.964063	0.662302	7.6451	0.962758	12.7233	5.97505	9.71373	6.4087	1.84908	6.41754	2.62846
cra_locus_104898_iso_1_len_323_ver_3	Gene of unknown function	0	0	0	0	0	0	0	0	0	0	0	0	0	0	0	0	0	0	0	0	0	0	0
cra_locus_10489_iso_1_len_2947_ver_3	Disease resistance protein RGA2	6.19293	12.3039	10.3897	10.4379	4.43887	6.46863	4.53173	13.3076	17.3498	15.1505	9.16548	6.92421	8.5809	4.51414	10.8297	5.70407	7.22149	9.58296	8.43977	8.91886	5.03724	8.50332	6.27839
cra_locus_1048_iso_4_len_4410_ver_3	ATP binding protein	43.0763	23.9582	21.0764	21.7697	39.1326	36.2923	34.6983	24.3162	23.2635	24.6844	19.9131	21.059	36.9401	53.3225	41.8697	48.9408	40.1137	32.4572	43.8995	46.1347	28.1678	43.8881	31.2378
cra_locus_10490_iso_1_len_2700_ver_3	Conserved gene of unknown function	1.86358	7.33808	8.16301	8.35081	4.5758	4.94907	2.95311	5.86677	4.22585	3.95847	4.98004	6.83916	3.33666	2.39514	9.83613	9.20215	12.3061	17.5971	14.0872	12.8946	5.42092	11.5473	5.24712
cra_locus_10491_iso_1_len_828_ver_3	Disease resistance response protein	6.29754	5.50221	2.46884	2.3103	14.5067	13.0814	13.6827	11.6554	7.27111	14.0841	3.1879	1.8475	0	0	38.3763	3.80793	130.186	63.506	86.5916	74.786	40.3618	75.1615	41.0428
cra_locus_104926_iso_1_len_310_ver_3	Prolyl 4-hydroxylase alpha subunit	0	0	0	0	0	0	0	0	0	0	0	0	0	0	0	0	0	0	0	0	0	0	0
cra_locus_10492_iso_1_len_2797_ver_3	Vernalization insensitive 3	16.7514	6.66181	5.15128	5.58514	15.766	13.5495	13.9757	7.37443	9.17497	11.9507	6.67149	6.29951	11.7546	18.4101	13.98	15.2592	12.9036	12.0982	9.15804	11.2733	9.98636	18.4282	15.653
cra_locus_104933_iso_1_len_433_ver_3	Gene of unknown function	2.41061	2.8716	2.05595	3.42685	4.43921	2.28281	3.01476	0	10.6825	3.36703	1.75133	0	5.60252	2.16998	3.26481	6.3497	6.0416	2.73496	3.57528	0	0	0	0
cra_locus_10493_iso_3_len_2126_ver_3	Bile acid:sodium symporter	3.30253	11.647	12.1798	12.9107	5.60658	5.42416	5.14433	10.0618	14.4063	11.2929	9.71723	10.955	9.64678	10.5538	6.30808	5.23462	7.56568	7.45776	6.61248	3.21073	2.24928	3.11133	1.65993
cra_locus_104946_iso_1_len_291_ver_3	Gene of unknown function	0	3.26271	5.54794	0	0	0	2.65641	2.62323	0	0	0	0	4.04953	9.89633	5.2891	2.96011	0	0	5.51303	0	0	0	0
cra_locus_10494_iso_9_len_3683_ver_3	Pentatricopeptide repeat-containing protein	17.1465	14.705	16.7644	13.8714	33.4118	32.6768	19.9994	13.8435	13.2646	13.5202	11.3856	12.5487	30.604	40.2333	18.6101	20.6206	17.6793	18.6782	17.057	14.67	12.1579	13.3647	13.6625
cra_locus_104957_iso_1_len_297_ver_3	ABA 8'-hydroxylase	0	0	0	0	0	0	0	0	0	0	0	0	0	0	0	0	0	0	0	0	0	0	0
cra_locus_10498_iso_1_len_427_ver_3	Conserved gene of unknown function	2.17506	8.28442	3.47825	5.41102	2.00273	3.55307	3.78883	7.08009	7.9241	7.30164	3.55546	4.17254	2.48805	2.4785	5.76462	5.69595	3.47518	4.05751	6.53252	0	0	3.22894	0
cra_locus_10499_iso_10_len_3177_ver_3	Cysteine desulfurylase	34.4771	73.5698	60.2902	58.4916	59.2075	34.9996	37.861	35.6088	18.9295	32.4671	46.3	57.2079	22.5587	27.0139	29.3008	21.1872	53.706	35.7742	69.72	71.567	51.9188	74.4555	34.7725
cra_locus_1049_iso_5_len_5681_ver_3	ATP binding protein	117.284	136.443	106.973	109.301	90.1163	92.9978	69.7169	144.133	62.9066	93.7747	79.0658	112.729	83.0836	90.0781	93.717	121.87	84.5703	97.2651	82.3152	72.2304	65.6363	60.534	66.9833
cra_locus_104_iso_5_len_1212_ver_3	Carbonic anhydrase family protein	57.3976	27.2521	29.6645	13.2632	11.9035	5.61304	4.11822	35.6134	2.73608	3.8677	5.44259	18.951	24.6934	20.7176	1.3943	18.5579	1.30672	4.09524	4.33446	4.15908	0	1.00276	0
cra_locus_105003_iso_1_len_365_ver_3	Gene of unknown function	0	3.27103	2.67804	4.5782	0	0	0	0	5.43416	5.15257	3.15864	3.84415	0	0	0	0	0	0	0	0	0	0	0
cra_locus_10501_iso_1_len_2097_ver_3	Pentatricopeptide repeat-containing protein	3.34884	6.84998	6.32594	5.39289	12.1092	12.4573	8.58194	7.47773	7.42456	8.43149	3.55821	3.61365	15.836	17.8893	7.16547	11.2507	4.05227	4.02777	3.8066	2.56703	1.7504	2.19891	1.77179
cra_locus_10502_iso_3_len_1437_ver_3	Conserved gene of unknown function	7.95431	16.002	20.4997	19.9932	14.483	14.9342	13.8405	16.5964	8.48807	10.3637	17.1859	19.461	11.7049	15.8909	16.9953	12.6688	11.5568	17.5663	14.2082	10.2994	8.49174	10.5315	8.91295
cra_locus_10503_iso_4_len_2151_ver_3	Inducer of CBF expression 2 protein	7.08818	18.9048	23.9422	23.7773	5.72835	5.33128	6.45032	17.3279	29.8811	26.3116	19.6056	22.6953	6.29986	8.40977	5.08319	7.78754	2.07043	6.64893	2.96098	1.58645	1.49908	0.559031	1.03602
cra_locus_10504_iso_3_len_993_ver_3	Neurogenic locus notch protein	21.496	2.91362	2.87208	7.10096	7.78619	6.50553	6.85871	5.70362	12.4836	9.42857	4.62394	3.15826	8.87816	11.1162	27.9348	7.05495	14.5166	11.3737	16.6317	13.9687	9.55818	11.7929	9.12216
cra_locus_10506_iso_3_len_4409_ver_3	DNA-directed RNA polymerase I largest subunit	15.6755	90.7664	90.4564	95.8086	26.0387	27.2886	19.8359	88.6255	89.3233	92.9722	82.1582	108.626	14.9054	18.6647	29.9175	22.9232	19.6342	25.2266	24.2055	22.8214	24.2423	20.719	19.7006
cra_locus_10507_iso_1_len_1195_ver_3	Ubiquitin-protein ligase/ zinc ion binding protein	0.742432	4.60825	5.63948	5.14518	46.2574	39.0205	27.9048	4.30291	3.13187	1.90902	4.0656	6.17174	1.21324	9.22874	19.2694	3.12102	50.0303	63.2718	40.2602	16.4347	15.9928	22.7215	22.704
cra_locus_105080_iso_1_len_315_ver_3	R1	2.64848	0	2.42018	5.64752	0	2.14978	3.65024	2.64341	3.48229	5.62099	0	0	2.47314	1.92576	2.62024	4.58905	0	0	0	0	0	0	0
cra_locus_10508_iso_3_len_2023_ver_3	Aldehyde dehydrogenase family 7 member A1	190.737	88.7105	78.3119	65.6506	93.906	125.804	101.555	97.4575	111.963	132.003	98.4306	74.8163	47.6039	44.2652	43.197	56.0375	68.0586	97.3766	67.9468	72.4016	133.566	67.7709	134.462
cra_locus_105099_iso_1_len_324_ver_3	Gene of unknown function	0	7.24432	5.86586	7.03957	0	0	0	6.5234	5.34541	7.54547	8.3945	6.88037	0	0	0	0	0	5.18608	3.18261	0	0	0	0
cra_locus_10509_iso_1_len_2816_ver_3	Protein OBERON 4	41.9326	26.5313	22.4515	23.9269	25.5733	30.4219	19.7281	30.0118	22.3344	30.1057	16.6285	23.007	21.014	23.9642	36.5232	29.1331	39.6146	40.3776	42.498	39.35	36.1309	37.5629	38.0277
cra_locus_1050_iso_8_len_2118_ver_3	Transferase	14.2708	7.80413	8.25039	8.91007	9.82525	10.5661	3.69256	6.18525	2.40357	3.22622	15.9187	11.0853	16.0831	13.165	10.4089	12.8511	26.6786	16.478	22.0741	10.5988	3.41309	12.0671	3.24487
cra_locus_10510_iso_4_len_3383_ver_3	Endoplasmic reticulum [ER]-type calcium ATPase	11.0984	34.8988	24.9297	32.0818	13.0511	13.4186	17.69	29.7537	36.4988	32.0769	16.0324	22.9686	12.4213	10.8583	14.8485	17.6625	12.3229	10.5673	4.90945	4.43949	4.44784	17.2422	13.3825
cra_locus_10511_iso_9_len_3671_ver_3	Nucleic acid binding protein	33.8336	18.7685	23.4903	29.2806	20.9463	22.6129	20.2242	10.7093	13.8209	14.2267	21.9525	22.5579	48.4452	37.2482	21.1159	43.1125	16.6759	13.5586	13.722	17.0113	18.5378	19.9636	21.9697
cra_locus_10512_iso_2_len_2305_ver_3	SCUTL1	12.195	15.1843	11.0091	9.80009	17.2188	17.7751	12.0023	8.18342	6.67311	6.57429	3.20194	10.3366	11.4675	11.652	30.052	29.1473	11.4748	36.4847	19.9591	21.2764	11.2776	11.9443	6.39924
cra_locus_10513_iso_2_len_1918_ver_3	Conserved gene of unknown function	26.6943	56.7602	97.2118	61.3193	59.7076	54.9414	34.2647	72.4762	26.4053	29.5243	87.1966	95.3853	23.44	52.5342	57.5994	31.6763	40.1417	59.7524	46.0316	52.0931	36.4671	62.3275	35.7872
cra_locus_10514_iso_5_len_1720_ver_3	Gene of unknown function	5.27929	14.2267	15.5953	13.1449	2.82821	4.61763	6.65384	10.73	8.73626	13.7483	24.1006	14.3491	2.30056	3.2417	7.424	4.86857	4.90759	6.78546	3.33129	2.06737	2.0109	4.67677	8.55888
cra_locus_10515_iso_3_len_832_ver_3	Carboxy-lyase	0	0	0	0	4.05326	5.43628	2.16681	0	0	0	0	0	0	2.78029	1.77435	2.3031	1.92509	0	4.94662	0	1.36602	0	0
cra_locus_10516_iso_1_len_1432_ver_3	Conserved gene of unknown function	4.93614	12.8821	9.96569	11.2931	13.067	12.3142	13.3937	11.12	23.1296	19.2588	8.1697	10.8502	5.79769	8.09	13.8555	8.07908	7.30676	6.42151	8.44205	10.7053	10.7893	9.86439	7.0513
cra_locus_10517_iso_1_len_2355_ver_3	Transferase, transferring glycosyl groups	27.1919	12.3641	10.7724	13.2268	29.4138	27.0676	26.169	8.30299	13.4518	10.2343	8.48678	10.0748	31.4127	27.6282	29.9536	39.6777	26.5138	31.754	23.908	23.658	18.4391	26.7751	15.477
cra_locus_105191_iso_1_len_356_ver_3	Gene of unknown function	0	9.33628	8.04358	16.2295	0	0	0	9.45807	12.6903	12.4796	7.57302	9.31059	0	0	0	0	0	0	0	0	0	0	0
cra_locus_1051_iso_8_len_3235_ver_3	Zinc finger protein	42.8315	55.9361	70.858	71.6359	40.8778	35.9965	40.1067	61.5042	55.4505	58.1666	55.9452	59.0219	30.2254	38.4765	38.3952	37.7745	34.2342	38.5469	32.6637	42.8903	29.3902	38.1422	28.6862
cra_locus_10520_iso_4_len_2296_ver_3	Vacuolar H+-pyrophosphatase	175.427	66.9703	44.8671	55.9627	172.314	137.11	522.783	104.502	158.244	103.641	49.3744	43.8908	107.017	104.699	85.7818	211.642	88.5017	89.7364	121.583	190.304	117.674	156.13	71.1144
cra_locus_10521_iso_7_len_953_ver_3	Copper transporter	58.9648	452.394	477.703	162.235	122.424	121.038	27.1788	528.556	89.0125	137.38	615.342	353.562	76.1668	40.453	41.1684	30.539	580.176	680.597	433.168	510.768	1090.39	865.733	778.218
cra_locus_105225_iso_1_len_732_ver_3	WRKY domain class transcription factor	0	3.03994	4.23377	3.28224	2.36215	2.62377	1.89752	11.4385	2.36115	5.18922	1.50968	4.59329	0	0	5.11197	0	2.66186	15.1128	3.28743	5.70959	1.56033	6.74972	0
cra_locus_10522_iso_1_len_323_ver_3	Polyprotein	0	9.34581	9.4173	12.0341	0	0	0	9.58461	16.3731	17.666	6.25712	9.72805	0	0	0	0	0	0	0	0	0	0	0
cra_locus_10523_iso_1_len_883_ver_3	Conserved gene of unknown function	22.3641	32.8176	55.3575	49.6247	26.2895	39.0932	9.57582	26.6384	24.393	28.0918	25.0206	60.6061	34.372	26.5789	25.817	27.4537	36.1072	34.6346	37.2097	10.1582	5.00933	12.1543	6.97202
cra_locus_10524_iso_1_len_1606_ver_3	UV-induced protein uvi31	27.9272	8.44066	8.77833	6.24285	18.8699	27.3694	27.8774	9.80593	7.6837	9.60594	10.9922	9.88704	25.5657	26.7816	20.6445	14.2618	20.4303	20.0493	25.3711	22.9892	99.1884	19.1191	39.6728
cra_locus_105250_iso_1_len_279_ver_3	Gene of unknown function	0	0	0	0	0	0	0	0	0	0	0	0	0	0	0	0	0	0	0	0	0	0	0
cra_locus_10525_iso_4_len_1817_ver_3	Ubiquitin-protein ligase	1.31627	18.4066	15.2138	20.3039	3.15773	8.80302	7.91474	13.9149	28.2218	23.4805	12.7024	19.5561	1.18678	2.57975	2.73181	1.13443	1.97935	7.65328	6.34152	4.41734	13.1286	2.98556	16.599
cra_locus_10526_iso_9_len_1141_ver_3	Binding protein	39.7514	14.8805	16.9308	16.5309	59.6739	47.5503	40.2128	12.2995	13.7329	11.0651	11.5802	17.2572	61.5723	55.5316	21.7443	25.1614	22.974	41.2741	24.0303	25.267	9.7657	31.0256	10.3793
cra_locus_105278_iso_1_len_370_ver_3	Conserved gene of unknown function	3.49063	10.0273	10.3521	9.47326	7.01248	7.03185	8.50413	11.8915	17.037	11.6046	4.14977	9.1989	7.05244	11.1127	5.39404	5.77332	4.53327	8.97299	6.56552	4.93614	5.46849	3.18888	3.49215
cra_locus_105282_iso_1_len_342_ver_3	Polyprotein	0	4.68186	2.65369	5.40608	0	0	0	3.51329	5.56832	3.75331	0	3.24235	0	2.63542	2.57443	4.00259	0	0	2.99958	0	0	0	0
cra_locus_105283_iso_1_len_356_ver_3	Gene of unknown function	4.79828	3.17433	3.59844	3.76337	0	3.94849	0	5.88502	6.85276	4.15988	8.87125	6.77134	2.37936	3.19306	2.99017	0	4.22974	10.1369	3.09202	0	0	0	0
cra_locus_10528_iso_3_len_2636_ver_3	Receptor protein kinase	1.26597	3.04477	1.88509	1.0326	10.5228	11.7684	7.83098	2.08269	1.30525	0.735235	0.624217	0	4.77514	11.2512	22.0934	37.7809	19.7861	13.9538	16.1229	14.6017	3.87097	13.12	6.18408
cra_locus_105295_iso_1_len_403_ver_3	Gene of unknown function	0	21.7136	33.8683	20.9765	0	0	0	27.0137	7.10113	7.27422	33.2958	31.5755	0	0	0	0	0	0	0	0	0	0	0
cra_locus_10529_iso_1_len_1247_ver_3	Exosome complex exonuclease rrp43	4.93072	15.6408	15.6847	12.3138	21.8686	17.5163	18.8566	27.9316	27.733	22.6409	9.23631	12.4225	8.13009	12.982	9.10494	12.6858	13.56	13.4679	11.7403	16.1583	15.31	17.2063	15.1917
cra_locus_1052_iso_1_len_1375_ver_3	Serine/threonine protein kinase	6.10989	13.972	11.6733	6.17139	20.4305	22.3826	7.84225	5.00402	3.02134	3.21557	3.94244	7.81396	4.04632	6.21443	80.7115	12.4102	34.6355	92.2559	22.0525	19.1428	15.7284	21.519	39.5398
cra_locus_10530_iso_3_len_1092_ver_3	Dioxygenase	0	0.746727	0	0	31.1811	61.3101	84.1874	0.646554	0	2.09399	0	0	0	1.9436	34.9032	1.62754	18.3692	9.03513	23.3715	27.0407	117.431	42.6854	71.6096
cra_locus_10531_iso_3_len_1140_ver_3	Cinnamoyl-CoA reductase	40.5177	11.0467	12.1488	8.51521	5.2015	11.9536	4.95934	4.8871	8.59079	11.6872	11.0811	9.46677	6.87582	5.23526	6.81083	5.36972	8.34839	8.72127	8.45066	5.12787	7.00999	4.80485	9.64662
cra_locus_10532_iso_6_len_1509_ver_3	Pectinesterase-2	9.98013	12.5419	17.4914	15.4867	6.23845	6.7715	5.13362	6.77999	10.7669	10.0266	14.1029	21.1948	29.9654	24.6539	4.3006	8.22308	3.46331	5.51313	5.17256	3.23697	4.07637	3.74047	3.21844
cra_locus_10533_iso_1_len_488_ver_3	Gene of unknown function	6.18411	17.0811	19.0653	16.6625	8.82069	9.70431	5.43008	8.6018	8.2166	9.75784	10.0884	17.9755	18.4814	14.769	14.5865	13.6419	14.7897	8.23512	16.9804	3.5251	2.02934	4.41332	4.78679
cra_locus_10534_iso_4_len_1824_ver_3	Conserved gene of unknown function	74.4806	33.7782	37.6742	28.366	113.79	65.2171	37.9331	31.7798	35.186	28.0047	24.1232	32.2266	123.337	152.456	146.593	98.7425	107.74	127.61	63.7715	55.8309	19.1884	73.1364	25.1075
cra_locus_10535_iso_1_len_392_ver_3	Gene of unknown function	0	0	0	0	0	0	0	0	0	0	0	0	0	0	0	0	0	0	0	0	0	0	0
cra_locus_10536_iso_1_len_409_ver_3	AAA ATPase domain-containing protein	0	0	0	0	0	0	0	0	0	0	0	0	0	0	0	0	0	0	0	0	0	0	0
cra_locus_105375_iso_1_len_366_ver_3	LOB domain-containing protein	1.60548	0	0	0	4.73048	3.64888	43.5417	0	0	0	0	0	0	0	4.09427	3.71754	9.89842	10.5927	3.64318	7.29999	4.88241	13.7869	7.33901
cra_locus_10537_iso_1_len_1107_ver_3	SAUR family protein	34.7314	47.4087	97.0838	99.0319	32.3492	31.5403	13.6656	36.9146	119.333	91.9433	50.0132	91.4037	21.8494	24.3084	148.112	73.1055	53.1332	39.1856	46.0926	30.9884	22.386	31.6374	19.6289
cra_locus_10538_iso_1_len_1168_ver_3	Peroxiredoxin	8.64535	14.7957	19.6895	18.7051	16.6788	14.7906	11.8135	21.8435	19.8924	19.3255	18.8842	20.4121	8.50769	10.8323	11.3874	9.79454	6.64311	10.8948	6.78456	6.36594	4.52634	6.24898	4.02114
cra_locus_10539_iso_2_len_1661_ver_3	Glycogen synthase kinase-3 beta	41.0757	4.11551	3.35058	3.08686	39.1949	37.2405	44.778	6.56965	14.1884	11.006	1.51739	2.71352	37.7063	43.5373	42.3301	73.7129	31.3077	24.6858	30.977	34.1151	15.9295	30.8619	17.7927
cra_locus_1053_iso_4_len_1725_ver_3	Ribose-phosphate pyrophosphokinase 3, mitochondrial	19.5236	31.2137	17.9981	17.9133	22.8332	35.1283	45.995	38.5383	39.1973	52.5708	19.8577	13.0556	14.8887	22.7528	35.1346	23.5676	52.0015	36.1325	45.1379	37.9428	92.1641	42.3166	87.6589
cra_locus_105405_iso_1_len_288_ver_3	Gene of unknown function	2.50678	7.0725	9.35367	11.2847	0	0	4.03076	6.10332	4.80663	9.31044	7.37586	6.76807	0	0	0	0	0	0	0	0	0	0	0
cra_locus_105406_iso_1_len_500_ver_3	OLE-4	0	0	0	0	24.3977	46.7328	145.796	0	0	0	0	0	0	1.39349	1.21539	0	0	0	0	0	0	0	0
cra_locus_10541_iso_1_len_609_ver_3	Gene of unknown function	0	1.15802	0	2.25437	0	0	0	0	0	1.27926	0	1.59068	0	0	1.2805	1.13144	1.40276	0	1.24518	0	0	0	0
cra_locus_105421_iso_1_len_518_ver_3	Gene of unknown function	6.63861	4.99462	4.6711	2.98847	9.37268	10.6873	8.53961	3.51374	2.88529	2.9082	5.93231	7.54679	8.38946	11.1806	10.6488	7.56395	9.15094	6.60486	9.89527	5.03087	4.935	3.63885	4.12114
cra_locus_10542_iso_4_len_2603_ver_3	Zinc finger protein	7.86137	9.27513	11.2673	10.6078	15.406	18.3209	19.2201	9.47889	12.0268	12.395	15.9429	17.7781	10.8269	13.3547	28.2195	16.1776	20.0082	24.2699	19.1073	14.9902	9.11965	16.5911	7.79361
cra_locus_10543_iso_3_len_3887_ver_3	Leucine-rich repeat receptor-like tyrosine-protein kinase	9.55037	3.14951	4.10853	6.12041	11.8626	8.94046	9.39577	2.54749	5.63622	3.57395	1.44882	2.72618	14.3737	14.2553	22.5638	47.6735	10.6498	6.08045	9.35986	8.99438	4.83348	8.7376	4.13133
cra_locus_105447_iso_1_len_286_ver_3	Gene of unknown function	4.42101	0	0	0	6.71991	4.54548	5.1905	0	0	0	0	0	4.40354	3.86528	7.4168	6.49966	6.33153	4.29931	28.3824	7.05332	4.69497	5.00046	0
cra_locus_10544_iso_6_len_2020_ver_3	RabGAP/TBC domain-containing protein	16.8755	7.02289	7.23112	6.48997	1.6681	2.03813	1.33999	4.48756	4.6687	4.13034	5.43712	5.74595	2.98416	2.99725	4.27775	2.66676	3.67776	5.33615	3.22835	2.92644	2.91996	2.38325	3.22055
cra_locus_10545_iso_2_len_1920_ver_3	Organellar single-stranded	11.2158	9.88056	12.0425	11.7953	8.85182	7.08801	6.65553	11.4124	10.4017	11.9346	11.0003	10.9775	10.2114	8.32081	9.33946	8.45491	12.9935	10.2029	13.3289	9.58595	9.22313	8.36428	7.26613
cra_locus_10546_iso_1_len_2105_ver_3	Protein phosphatase 2c	6.41125	7.82359	8.7355	6.15014	16.382	14.3343	10.0296	10.8258	14.592	10.7817	7.56614	6.26618	8.24523	14.6586	11.4041	12.9603	23.3577	16.9088	23.2734	19.0226	25.2565	10.7855	7.41285
cra_locus_10547_iso_1_len_2362_ver_3	Pentatricopeptide repeat-containing protein	1.27551	7.11878	5.3107	3.62646	3.7867	3.90037	3.90301	6.53998	3.52184	3.60437	2.75979	2.53091	2.12226	4.16082	3.18707	3.45211	2.58065	2.07658	2.19789	3.44093	1.55157	3.17795	1.68833
cra_locus_105483_iso_1_len_319_ver_3	Myb	0	0	3.10284	3.18264	0	0	0	6.87287	14.0232	10.8737	0	0	0	0	0	0	0	0	0	0	0	0	0
cra_locus_10548_iso_3_len_1224_ver_3	Breast carcinoma amplified sequence	50.6185	34.8472	31.4518	24.9729	44.579	42.6526	51.6402	42.9626	45.838	49.5165	37.2419	32.4259	25.4516	32.1046	36.267	36.3936	40.9184	52.6324	39.7063	48.3243	46.6304	50.379	46.2991
cra_locus_105499_iso_1_len_345_ver_3	Gene of unknown function	2.05461	32.8483	26.7231	38.7003	9.24888	6.22619	3.48723	19.5746	43.5984	27.5891	16.5689	32.4076	0	0	2.91382	7.74039	5.92179	2.68969	2.9711	11.0631	8.331	3.754	4.0583
cra_locus_10549_iso_1_len_943_ver_3	Gene of unknown function	7.16266	1.13568	0.833029	0	1.52615	0.739956	0.888375	1.35352	5.35741	5.81779	1.93527	2.62445	2.24423	3.45282	5.29613	4.17734	1.1572	4.09162	1.26426	0	0	1.18972	0
cra_locus_10550_iso_7_len_2160_ver_3	MRNA, clone: RTFL01-26-I02	106.178	6.80502	4.51487	2.41822	1.8232	42.5565	0.911718	11.4332	14.9553	37.8645	52.4592	10.9966	1.6927	2.54528	4.7952	2.28157	10.5182	68.3221	8.2015	6.07596	59.1695	2.36585	14.9372
cra_locus_10551_iso_3_len_2615_ver_3	Phosphatidylinositol glycan	13.8086	15.6308	11.1615	14.0087	12.3549	11.9591	17.9871	11.7471	14.2817	18.5062	10.5611	11.3451	9.95606	10.2944	11.3889	13.7263	12.9308	13.2454	13.7124	14.52	16.161	14.0676	13.7438
cra_locus_10552_iso_9_len_3217_ver_3	Ctc-interacting domain 3	46.6543	63.0129	65.1788	83.0418	32.566	33.4804	41.6976	46.3509	55.6334	62.1412	62.6529	67.3715	30.9951	25.0254	45.0359	50.7314	34.6317	42.7637	36.8806	37.1216	41.358	31.5357	45.3124
cra_locus_10553_iso_1_len_1518_ver_3	Polynucleotidyl transferase, Ribonuclease H fold	0	4.01868	4.32317	3.97741	0.713754	1.11488	0.389511	3.9234	4.51481	5.48132	3.18368	3.40784	0	0	2.36625	3.96649	1.4753	2.28325	2.66765	1.65218	1.03135	0	0
cra_locus_10554_iso_2_len_1363_ver_3	SRC2	125.284	30.3008	43.118	38.4569	68.1665	71.9919	38.564	37.7132	37.951	56.7324	38.6122	44.8157	34.8357	21.499	173.535	91.0964	107.952	184.77	115.586	74.6395	71.8668	89.1476	71.1389
cra_locus_105559_iso_1_len_322_ver_3	Gene of unknown function	0	13.9624	21.4975	12.8627	0	0	0	29.5557	11.047	14.9829	25.1139	32.1177	0	0	0	0	0	0	0	0	0	0	0
cra_locus_10555_iso_2_len_501_ver_3	Gene of unknown function	381.484	577.993	384.507	447.143	387.144	358.35	1048.02	688.743	1196.56	926.546	335.63	302.385	544.725	633.492	953.497	777.824	935.642	1142.2	951.415	641.907	904.722	610.725	618.893
cra_locus_10556_iso_2_len_413_ver_3	PEARLI 1	2231.32	0	0	0	38.4012	14.8906	122.642	0	0	0	0	0	5.89432	7.99573	8.96634	28.4306	19.2807	0	47.1125	72.8318	3.42786	103.232	9.54184
cra_locus_105575_iso_1_len_303_ver_3	Gene of unknown function	10.3483	36.1431	27.4783	31.3779	15.6037	14.6671	18.695	25.4094	27.8063	34.004	25.6428	30.0715	8.37409	28.4014	25.4203	12.9303	21.7785	19.1954	24.5943	18.1556	14.1819	23.7562	12.0099
cra_locus_10557_iso_1_len_1160_ver_3	Conserved gene of unknown function	16.6954	8.36798	12.1788	5.57642	29.9524	28.6489	17.8456	14.8274	8.07197	9.89513	10.6975	9.78881	18.5116	37.1012	17.2528	12.6594	23.6671	29.8344	33.0133	20.7212	17.0696	20.6276	16.5223
cra_locus_105581_iso_1_len_288_ver_3	Leucine-rich repeat receptor protein kinase EXS	0	0	0	0	4.1034	2.61127	0	0	0	0	0	0	0	0	2.4528	0	4.08372	0	5.29804	0	0	0	0
cra_locus_105591_iso_1_len_287_ver_3	Gene of unknown function	0	32.8963	18.2433	41.4381	0	0	0	12.2539	17.0493	13.4207	58.1386	73.307	0	0	0	0	0	0	0	0	0	0	0
cra_locus_105594_iso_1_len_511_ver_3	Gene of unknown function	1.45926	0	0	0	1.5159	2.42363	0	0	3.09938	4.87464	0	0	1.76096	4.6513	0	3.09428	0	0	5.0944	0	0	0	0
cra_locus_1055_iso_9_len_2177_ver_3	Sugar transporter	61.8879	234.146	205.686	213.196	45.3648	50.0628	44.4977	88.0546	102.777	92.0267	80.1743	157.76	31.0193	23.3324	72.0191	56.9914	61.1338	105.807	50.736	53.4672	36.1042	46.5283	38.2526
cra_locus_10560_iso_1_len_2258_ver_3	Conserved gene of unknown function	1.21365	12.0804	9.75064	11.663	5.06597	3.06177	1.56119	5.67343	2.94148	2.3301	5.7771	7.82281	1.80875	2.89549	9.32072	15.2289	3.83258	2.36413	5.67008	5.80883	1.37791	5.18891	1.8082
cra_locus_10563_iso_5_len_1631_ver_3	Binding protein	1.08074	22.6018	21.6466	23.2374	1.49267	1.80383	0.977498	15.3588	15.4902	15.67	19.4771	29.8893	1.72194	2.6769	8.44064	5.36248	2.33619	3.60774	3.20079	1.13152	0.958602	1.04903	0.857693
cra_locus_10564_iso_1_len_3804_ver_3	Kinesin heavy chain	38.9984	6.06549	4.30888	4.82876	35.2618	32.8835	36.5811	4.55157	5.60625	3.50512	2.86763	5.23008	34.0262	42.5878	23.977	32.1598	36.5744	16.5035	26.5351	31.5894	10.6931	41.2443	17.2041
cra_locus_10565_iso_1_len_848_ver_3	Retrotransposon protein, unclassified	2.7746	0	0	0	0	0	0	0	0	0	0	0	0	0	0	0	0	0	0	0	0	0	0
cra_locus_10566_iso_1_len_1162_ver_3	Erg28	10.076	17.2992	8.98051	9.63968	26.6164	21.3809	41.4639	13.3454	17.141	16.1535	6.43215	6.75864	14.7956	19.1414	14.7619	22.5362	15.2954	13.8031	16.1269	35.0838	11.4242	42.3167	10.9146
cra_locus_105677_iso_1_len_460_ver_3	Gene of unknown function	2.76173	5.66675	4.17551	0	2.92819	2.28245	1.6148	10.0462	0	0	0	2.35465	2.62577	1.39731	4.3874	9.68917	10.5712	18.3398	8.54583	12.9178	4.58108	17.8903	7.22612
cra_locus_10567_iso_1_len_746_ver_3	XH/XS domain-containing protein	2.33926	1.91598	1.93074	2.52076	2.31603	1.80077	3.15471	2.10883	1.27328	1.29353	1.08548	0	1.08515	2.54582	2.5455	3.41138	2.49641	2.13374	1.00726	0	0	0	0
cra_locus_105688_iso_1_len_299_ver_3	Gene of unknown function	3.00582	4.74905	3.8454	4.55786	2.70615	0	4.08135	0	0	2.29003	4.45486	4.10042	0	0	0	0	0	0	0	0	0	0	0
cra_locus_10568_iso_1_len_464_ver_3	Gene of unknown function	2.48698	2.94736	5.09108	2.65178	5.49605	4.87511	2.99975	3.23875	3.62505	1.91872	3.82136	5.72595	3.49575	5.4096	6.38708	3.7713	6.91852	4.68794	6.14212	0	0	3.74834	2.00025
cra_locus_105691_iso_1_len_336_ver_3	Gene of unknown function	2.29066	119.927	69.2161	125.391	0	0	0	68.3926	47.3096	69.08	80.0873	94.2118	2.99461	0	0	0	0	0	30.6955	8.64547	14.2912	0	0
cra_locus_10569_iso_1_len_2310_ver_3	Hydrolase	15.9397	12.9293	9.77112	10.5204	14.8223	15.2024	18.4852	18.9825	36.1304	41.0399	8.68523	8.6152	11.9385	14.4082	13.3133	14.2017	40.9476	34.8398	70.131	35.4208	22.3615	21.1059	13.3728
cra_locus_1056_iso_3_len_3359_ver_3	Conserved gene of unknown function	30.4481	10.0665	6.85936	9.44677	35.5656	43.9986	53.1563	5.86154	3.16526	3.08226	3.39957	5.65194	61.8319	62.5932	25.704	36.2066	141.806	44.9218	118.394	95.5343	48.8177	77.1843	72.7587
cra_locus_105701_iso_1_len_474_ver_3	Gene of unknown function	3.76909	16.7398	15.0878	17.284	3.1346	2.62514	3.25833	17.1436	36.7414	22.3703	17.1717	15.7567	0	2.82868	3.6042	2.68124	4.38797	5.15695	2.92129	0	3.20447	3.11006	4.94031
cra_locus_10570_iso_1_len_6249_ver_3	SAB	13.1434	24.7575	21.711	21.6892	16.6273	16.9624	16.3831	28.2981	27.2868	20.0901	13.8208	16.761	12.1791	15.7771	16.1665	14.8808	17.5539	13.364	18.0668	12.5732	8.35913	14.0177	8.8509
cra_locus_105718_iso_1_len_410_ver_3	LOB domain-containing protein	1.56208	0	0	0	7.14796	6.2936	67.5885	0	0	0	0	0	0	0	4.21768	5.32378	9.18239	10.931	4.17022	4.41791	0	9.60012	3.84679
cra_locus_10571_iso_4_len_1317_ver_3	RabA2	4.03265	2.13328	1.8809	3.22465	0.928283	1.76622	1.12574	1.01385	2.06197	2.06423	1.86772	1.64749	2.14172	1.68711	2.3838	2.8254	2.21088	2.17764	2.41109	1.5079	1.1923	2.14903	2.06246
cra_locus_10572_iso_1_len_1452_ver_3	Mitochondrial inner membrane protease subunit	4.06831	5.53524	5.05874	4.26999	8.35548	8.33896	13.6946	4.29856	4.60756	4.60582	4.12688	3.30656	7.40621	7.86141	4.55336	6.95936	5.37446	5.19641	4.36471	4.18554	5.0105	5.76598	4.50606
cra_locus_10573_iso_2_len_2205_ver_3	Nramp transporter	23.2233	17.8744	29.1692	27.5349	14.4997	12.7432	16.0988	24.8573	33.1444	27.4772	32.3529	26.6264	10.7918	14.1579	21.1314	14.7499	19.667	23.7093	16.2297	24.6343	27.6245	24.5775	29.0044
cra_locus_10574_iso_4_len_4756_ver_3	Protein SCAR1	8.53863	22.282	18.4355	19.0535	14.5438	11.5111	10.6745	17.0549	19.8225	16.2197	10.8967	16.2191	23.298	28.8218	18.7112	19.8901	16.0242	13.9709	18.3646	16.3252	8.42353	17.3368	9.4179
cra_locus_105756_iso_1_len_297_ver_3	Gene of unknown function	0	12.7587	8.52301	14.3496	0	0	0	8.46286	13.626	17.7648	6.33614	11.3603	0	0	0	0	0	0	8.35388	6.76381	13.0975	0	0
cra_locus_10575_iso_5_len_1587_ver_3	Holocarboxylase synthetase 2	17.4677	19.9089	24.4792	23.8443	14.6235	14.996	14.5554	22.8948	26.049	26.1928	17.5295	17.6466	15.2541	21.4295	17.6878	11.6405	18.8518	17.4571	11.5887	11.3024	12.6026	13.4514	12.6408
cra_locus_10576_iso_1_len_1849_ver_3	Conserved gene of unknown function	1.45667	6.13948	5.09621	6.04323	9.67159	7.09426	13.0974	3.39867	8.16264	4.92609	1.4384	3.1936	2.52614	11.2998	14.1359	23.568	11.4888	9.01311	8.96806	11.5962	1.92864	13.6877	3.77479
cra_locus_10577_iso_4_len_3648_ver_3	Cyclin-dependent protein kinase	15.9967	24.0593	25.648	27.7986	14.7751	16.1906	14.2471	20.3204	23.8274	23.697	21.1537	28.9857	12.5476	12.6525	10.7978	15.8252	16.4114	18.2952	18.8185	13.8817	15.3671	14.6685	17.4901
cra_locus_10578_iso_6_len_2510_ver_3	Conserved gene of unknown function	5.659	4.0976	3.50128	3.78214	9.35713	11.3624	16.691	3.8921	3.62951	2.89087	2.36701	3.10502	11.1756	13.3317	8.74949	11.9626	9.67395	8.34179	7.69943	7.0713	5.04003	7.70986	5.372
cra_locus_10579_iso_1_len_5134_ver_3	Heat shock protein binding protein	45.9334	50.3903	37.7067	41.1161	36.9527	40.7201	34.7308	42.6508	38.4002	41.0349	40.6504	39.0364	27.9048	24.4468	44.9545	53.4056	34.09	33.981	35.5374	30.1314	26.9663	31.4672	26.6102
cra_locus_1057_iso_2_len_3893_ver_3	Receptor kinase S.2	10.6837	2.2913	1.41515	1.09479	9.62663	8.03551	5.56867	2.91705	2.36268	3.71241	1.92265	1.67137	3.05699	4.79579	8.30701	28.0224	14.8444	4.77322	16.7281	14.5429	2.75364	12.1778	4.24345
cra_locus_10580_iso_1_len_1070_ver_3	TOM2B	15.0204	19.2387	18.551	19.7272	17.1643	14.293	17.327	19.4764	18.4166	18.5315	21.0698	22.2451	11.4829	13.2673	16.6741	21.6624	15.0059	19.8401	13.8059	16.7912	11.2747	15.004	11.0872
cra_locus_105810_iso_1_len_277_ver_3	Gene of unknown function	3.70879	6.40137	6.97753	8.37368	0	3.22293	0	0	6.35845	5.98364	4.27945	0	3.42251	5.78997	3.26306	3.60832	4.26485	4.45534	0	0	0	0	0
cra_locus_105814_iso_1_len_295_ver_3	Gene of unknown function	0	10.1	12.4903	10.1202	0	0	0	10.5935	6.5522	8.60054	6.91577	6.93681	0	0	0	0	0	0	0	0	0	0	0
cra_locus_10581_iso_6_len_1244_ver_3	Conserved gene of unknown function	20.5731	50.6566	67.5651	45.6419	28.647	23.4296	15.4662	48.5343	36.5449	39.8466	75.1794	71.074	17.6975	34.8387	21.9528	15.3195	29.2629	28.6812	28.5316	19.2886	19.3201	26.3614	19.5266
cra_locus_10582_iso_5_len_942_ver_3	Acetyltransferase, GNAT family protein	18.8448	25.7479	34.4949	30.8329	20.7347	19.1252	20.6456	27.627	21.2713	23.8384	29.6809	26.2733	18.5158	18.9518	27.1336	16.989	20.0504	29.6037	20.5667	17.018	19.8238	18.4068	16.7552
cra_locus_10583_iso_1_len_1869_ver_3	Conserved gene of unknown function	3.52857	5.84045	7.78693	7.23157	7.11168	6.4491	3.21512	6.34993	5.86374	5.98147	6.15249	9.32624	2.07582	5.2492	5.98782	3.7286	4.64284	7.76033	6.31931	3.94066	5.90188	4.02943	4.5303
cra_locus_105840_iso_1_len_383_ver_3	Ferric-chelate reductase	0	6.20942	6.06139	7.60447	0	0	0	9.51329	6.79898	11.1785	5.7962	7.29736	0	0	2.27199	0	0	0	0	0	0	0	0
cra_locus_105843_iso_1_len_278_ver_3	Gene of unknown function	0	0	0	0	0	0	0	0	0	0	0	0	0	0	0	0	0	49.8359	6.0909	0	0	0	0
cra_locus_10584_iso_2_len_2153_ver_3	Signal transducer	4.11386	1.75359	1.14058	1.37605	10.7266	10.1315	14.5815	1.45612	1.05501	1.45553	2.94803	2.56276	5.4947	7.73786	8.90054	11.5439	6.6651	9.04363	7.6845	9.32686	2.84041	14.0092	4.14019
cra_locus_10586_iso_1_len_999_ver_3	Gene of unknown function	0	0	0	0	1.23261	1.33109	0	0	0	0	0	0	7.21902	9.81341	0	0.738032	0	0	0	0	0	0	0
cra_locus_105871_iso_1_len_315_ver_3	TNP2, partial	11.9182	35.013	51.5498	44.9112	6.03852	6.66431	2.83907	25.4729	43.8188	48.427	67.5375	50.646	6.43016	7.41396	6.24825	6.0492	17.3531	5.0521	9.84827	0	4.60244	7.60426	12.1709
cra_locus_10587_iso_1_len_1124_ver_3	Conserved gene of unknown function	6.17634	7.58362	8.21756	8.49915	34.5768	32.1175	29.0785	5.27234	5.76035	3.55739	2.32615	14.2391	18.5388	24.2272	24.6295	25.8244	45.1754	30.66	56.6553	29.5614	13.3233	22.5697	8.4491
cra_locus_10588_iso_1_len_2512_ver_3	Conserved gene of unknown function	23.6204	14.1398	14.3564	13.9083	26.5909	23.1275	25.437	18.7115	19.9882	19.5478	16.9262	15.4199	21.1654	26.3145	36.3183	36.1117	31.5545	27.7951	28.5043	35.6158	29.7311	39.9323	30.4724
cra_locus_10589_iso_2_len_1576_ver_3	Conserved gene of unknown function	14.0945	45.4688	46.8457	56.082	18.6777	17.368	26.431	34.9197	53.595	55.7158	41.7112	46.6963	13.5337	13.7215	16.0142	17.7006	14.0947	15.3836	9.66366	19.585	20.2082	20.8318	20.7836
cra_locus_1058_iso_6_len_1923_ver_3	Histidinol dehydrogenase	36.565	61.9297	48.1669	49.665	93.6386	78.5588	90.7944	66.878	55.5195	50.5028	33.2848	37.9462	76.1095	83.3624	51.1206	61.0435	53.0517	69.9609	45.9863	74.1734	53.34	71.9754	44.2532
cra_locus_105900_iso_1_len_418_ver_3	Gene of unknown function	2.78173	5.49376	5.16015	4.74533	2.56133	2.37083	2.08734	3.88697	3.84036	3.49686	2.91017	6.40362	3.45477	8.03254	4.12981	2.91387	4.3922	2.40343	3.15617	0	0	0	3.06124
cra_locus_105901_iso_1_len_481_ver_3	Gene of unknown function	0	13.9139	19.4482	5.61539	3.08606	0	2.18135	22.6561	1.83616	6.97649	34.2811	18.7785	0	0	6.58869	1.8478	9.72003	7.70965	7.66945	3.43749	3.6402	5.24896	0
cra_locus_10590_iso_8_len_1811_ver_3	RNA binding protein	25.7164	11.273	10.8759	11.6104	43.3134	35.3996	38.5027	16.083	49.8805	32.4768	7.54388	11.183	22.069	37.8524	16.7649	18.5802	48.7613	28.6653	38.7446	36.7656	22.9601	44.9342	29.0432
cra_locus_10591_iso_1_len_1872_ver_3	Membrane protein	69.7813	5.53277	6.15931	7.345	24.8684	36.5966	16.2382	27.8942	64.5313	63.7432	22.6888	14.1168	47.3976	30.2072	9.95314	7.67165	15.4951	15.5876	23.1984	14.1914	85.2296	5.63202	37.6745
cra_locus_105929_iso_1_len_564_ver_3	Gene of unknown function	9.55597	3.19535	4.39854	6.68486	3.78663	5.74559	5.04058	0	0	0	1.52072	3.27651	9.71658	10.6183	16.5635	15.053	7.52718	5.4015	16.4684	12.463	4.61295	3.69509	4.62248
cra_locus_10592_iso_1_len_3345_ver_3	Nucleic acid binding protein	12.1882	28.0622	27.595	33.6788	10.8169	11.162	10.4418	22.9234	24.1275	22.6925	28.3356	28.9354	9.44939	8.92365	15.5663	14.9324	10.0596	12.5594	10.3888	13.354	14.8858	13.8028	14.6684
cra_locus_10593_iso_2_len_2484_ver_3	Conserved gene of unknown function	10.843	8.10807	8.09178	6.54786	10.0921	8.8907	8.88282	8.93053	8.68822	9.72168	8.35786	6.65171	8.35528	8.61406	8.46093	8.48086	9.24623	7.4781	11.62	8.96594	7.86383	9.503	10.3355
cra_locus_105944_iso_1_len_291_ver_3	Gene of unknown function	0	2.33051	2.90606	3.52277	0	3.05071	0	0	3.16773	3.06795	4.32083	4.57776	0	0	0	0	3.72642	0	2.75651	0	0	0	0
cra_locus_10594_iso_1_len_784_ver_3	Gene of unknown function	3.15278	2.8709	1.64999	4.32946	0.923043	0	0.690822	1.36547	2.52805	2.743	1.82708	2.50492	1.17072	1.11741	2.41509	1.54054	2.37051	0.843644	0.955884	0	0	2.29088	1.75852
cra_locus_105956_iso_1_len_672_ver_3	Gene of unknown function	8.83514	2.46896	0	1.19617	4.75193	5.45033	5.05117	0	0	1.34624	1.65055	0	7.48019	4.24091	1.68669	10.4842	15.3104	3.96551	12.5796	11.4779	8.01789	7.07208	2.99166
cra_locus_10595_iso_2_len_3263_ver_3	Mitochondrial saccharopine dehydrogenase	7.12697	8.58113	9.33169	8.20509	10.0334	10.6465	14.4368	7.39566	9.23872	7.57113	9.36381	7.38875	5.55531	7.8766	10.9451	6.32732	28.227	35.8479	31.51	27.5853	10.0906	20.9693	7.09527
cra_locus_105965_iso_1_len_757_ver_3	Gene of unknown function	0	0	0	0	0	0	0	0	0	0	0	0	0	0	0	0	0	0	0	0	0	0	0
cra_locus_10596_iso_1_len_2393_ver_3	MYB family transcription factor	1.64786	17.8219	15.0205	18.0572	4.299	2.99095	3.04221	12.7049	13.6218	12.5545	9.3979	11.4739	3.14164	4.72551	8.69128	11.659	5.19687	6.04019	6.23224	7.50363	3.57286	4.59987	3.37113
cra_locus_10597_iso_1_len_2301_ver_3	L-type lectin-domain containing receptor kinase S.1	13.7405	12.6042	22.4225	16.2833	17.8631	16.3992	9.7004	27.4068	19.0317	16.4374	26.6572	16.4865	11.332	17.1389	29.2306	17.5664	34.0195	31.0872	20.9478	16.4128	15.8357	25.1924	20.9249
cra_locus_105981_iso_1_len_291_ver_3	Gene of unknown function	0	0	3.69863	4.99059	4.05641	2.81604	0	9.96828	5.06837	6.60788	0	0	0	0	0	2.96011	0	0	3.58347	0	0	0	0
cra_locus_10598_iso_4_len_2801_ver_3	Conserved gene of unknown function	20.0258	12.203	14.2579	16.537	17.4207	18.1878	16.2571	12.025	11.3174	12.1342	12.3283	13.7125	17.7085	20.3783	18.6881	19.8428	22.512	22.659	24.6728	22.0002	13.4938	21.5042	16.7209
cra_locus_10599_iso_2_len_2248_ver_3	Auxilin	61.1075	153.218	181.543	176.254	42.0574	44.3186	32.3446	171.094	147.101	159.105	179.259	189.508	39.5894	46.0237	57.2514	64.7658	48.5815	42.0723	56.8262	43.8792	32.6751	45.3514	39.4643
cra_locus_1059_iso_4_len_1655_ver_3	Deacetoxyvindoline 4-hydroxylase	12.7941	71.536	133.599	130.281	84.3572	175.242	141.981	13.936	19.549	12.8149	7.07096	48.6546	303.76	272.68	3.03976	33.6812	2.4517	2.29996	2.22081	1.79159	2.96812	0.516555	2.33773
cra_locus_105_iso_3_len_1997_ver_3	Kinase	41.7332	17.902	13.6113	16.5709	29.9042	26.243	43.9407	16.9726	16.5314	14.1696	11.0013	12.5169	19.0487	32.8047	32.1705	37.862	30.4274	30.8363	27.8167	41.9095	42.0818	40.6372	36.3521
cra_locus_10600_iso_2_len_1354_ver_3	Zinc finger protein	0	0	0	0	0	0	0	0	0	0	0	0	0	0	0	0	0	0	0	0	0	0	0
cra_locus_106014_iso_1_len_296_ver_3	Conserved gene of unknown function	0	2.28686	0	0	0	0	0	5.14821	3.10841	3.47365	0	0	0	0	0	0	15.236	97.7273	21.0982	6.30421	0	0	0
cra_locus_10601_iso_8_len_1410_ver_3	Triacylglycerol lipase	5.17149	11.3187	11.0266	15.7058	5.38701	4.45211	3.69576	8.95812	19.1711	21.9833	10.7078	15.165	5.94127	4.20799	3.95145	7.17101	7.30533	5.72372	6.01403	6.93804	7.78405	6.15609	8.49023
cra_locus_106020_iso_1_len_440_ver_3	Zinc finger, C3HC4 type (RING finger) domain containing protein	2.63283	0	0	0	3.07069	0	1.69338	0	0	1.80528	1.7215	0	4.81871	2.799	2.37152	4.35457	2.57344	0	3.69011	4.41047	5.60468	0	2.89738
cra_locus_10602_iso_4_len_2027_ver_3	Xpa-binding protein	24.886	57.117	81.5328	55.5104	35.2731	38.8965	21.8582	78.2743	52.6296	53.2278	61.4756	74.8973	16.5678	24.4097	40.2117	22.9016	59.8189	53.2171	53.1353	52.621	40.0775	52.3963	38.5112
cra_locus_106039_iso_1_len_410_ver_3	Neutral invertase 5	38.91	71.4762	88.2927	71.867	82.4631	84.7215	65.4573	83.5207	71.6672	86.6606	160.263	145.291	24.8768	32.2381	38.411	40.2415	59.7923	54.8781	51.9382	62.5304	70.5365	66.163	110.836
cra_locus_10603_iso_8_len_4351_ver_3	Importin-7	46.1054	113.303	109.175	130.141	44.7077	41.0157	46.0013	90.1169	81.8999	92.918	98.2889	114.439	26.1848	25.7345	54.7219	45.7025	39.0047	38.682	43.8638	51.5279	58.0436	44.0526	47.3692
cra_locus_10604_iso_1_len_705_ver_3	Conserved gene of unknown function	3.20146	6.05173	4.30047	5.12	6.97646	6.54855	10.6387	7.21854	6.50696	7.2258	5.33792	6.14154	4.39458	9.03243	7.51226	7.94258	8.42487	7.79532	8.43999	4.40534	2.75851	5.70319	4.06516
cra_locus_106057_iso_1_len_594_ver_3	Gene of unknown function	3.35162	6.91645	4.04277	3.26714	5.52552	5.22339	4.51667	6.93369	9.25425	6.01894	1.3775	2.44937	5.25794	5.21813	4.95577	7.07444	6.76802	2.85821	7.28598	2.97916	0	2.62448	0
cra_locus_10605_iso_1_len_2202_ver_3	Pectin methylesterase 1	21.8859	0.337189	0.605212	0.353952	18.0656	9.62008	11.984	2.59353	0	0.369904	0	0	21.6134	24.2864	7.41929	18.4217	11.5694	4.65453	7.71063	11.8575	3.02876	11.5096	3.96252
cra_locus_10606_iso_3_len_2689_ver_3	CCHC-type integrase	29.188	12.5562	7.59827	3.74445	12.2734	15.3593	6.43213	24.378	3.07326	3.76564	6.63644	2.53193	4.68	3.79103	17.8125	7.96183	47.8832	24.6195	42.8844	37.3103	41.3611	38.8732	43.4247
cra_locus_106073_iso_1_len_298_ver_3	Gene of unknown function	9.85551	7.71753	7.46207	6.57627	12.3464	68.3405	20.9138	24.2722	26.5336	33.3289	36.2974	10.9751	17.3543	30.1316	51.4885	7.98392	37.8068	33.4921	30.338	0	44.0397	7.34984	42.2253
cra_locus_106076_iso_1_len_588_ver_3	Gene of unknown function	0	18.3505	15.6017	23.3906	0	0	0	15.4916	11.5806	21.5689	16.7075	17.8247	0	0	0	0	0	0	0	0	0	0	0
cra_locus_10608_iso_4_len_1684_ver_3	C-4 methyl sterol oxidase	32.1359	16.3809	19.0713	13.7097	47.4398	37.7446	52.8467	31.1044	25.6756	19.2778	12.2697	10.0343	41.6698	40.5691	20.973	33.7039	47.243	35.0761	31.6811	48.7403	22.2697	55.8488	16.9366
cra_locus_106096_iso_1_len_667_ver_3	UDP-rhamnose:rhamnosyltransferase	1.10245	8.13486	10.0896	15.9132	0	1.2528	1.81813	10.2339	4.03265	7.46235	13.4188	17.3529	0	0	0	0	2.04038	0	1.58478	0	4.64212	0	3.30225
cra_locus_10609_iso_1_len_836_ver_3	Conserved gene of unknown function	6.23512	2.1942	3.94546	2.47802	4.60933	5.40934	2.65915	3.66212	5.55353	5.0568	3.50699	3.20107	3.06767	3.10379	7.20326	6.35757	2.92373	5.26606	3.31123	3.04845	1.35925	3.06243	1.58912
cra_locus_1060_iso_3_len_984_ver_3	VAMP protein SEC22	369.215	74.6777	78.6394	69.0211	147.454	226.749	89.5784	116.299	37.63	47.3282	44.7489	45.8882	100.728	130.272	136.347	198.9	476.745	316.214	329.795	316.579	289.677	322.962	223.681
cra_locus_106101_iso_1_len_298_ver_3	Vegetative storage protein	5.43058	2.49685	0	0	2.96314	3.42845	2.80289	2.55497	3.70236	3.67767	0	0	0	2.45973	2.57443	3.77018	3.327	0	0	0	0	3.67492	0
cra_locus_10610_iso_4_len_1336_ver_3	Vesicle-associated protein	73.0641	43.9608	42.9496	41.6053	56.2595	54.3333	77.7007	50.692	53.975	63.0136	55.8125	44.118	43.3483	58.0208	71.6015	67.0977	67.9766	60.4779	56.583	69.1478	100.711	69.5845	108.002
cra_locus_106114_iso_1_len_588_ver_3	H/ACA ribonucleoprotein complex subunit 1 1	25.7457	112.943	176.448	113.651	92.4467	80.8416	52.603	155.162	84.4792	81.7407	151.506	213.072	31.0005	54.5047	68.0876	31.1628	59.965	143.38	88.1118	48.4098	33.3588	64.7246	19.0086
cra_locus_10611_iso_1_len_2267_ver_3	Pentatricopeptide repeat-containing protein	2.03074	3.87418	3.9588	3.29925	3.20544	2.85715	2.41011	4.42222	3.22633	3.89551	3.6673	3.71017	2.65481	4.74981	3.70312	2.87892	2.47207	3.64586	2.03302	1.96706	3.13684	3.04782	2.25116
cra_locus_10612_iso_3_len_1428_ver_3	Xenotropic and polytropic murine leukemia virus receptor ids-4	51.9386	17.9161	18.034	12.1501	16.6178	21.8642	7.71098	37.6558	105.389	22.8273	18.586	16.4207	10.4151	14.4213	23.89	15.586	109.595	183.84	234.523	83.8238	133.37	22.4703	23.0804
cra_locus_10613_iso_2_len_1312_ver_3	Cyclin A3	0	0	0	0.779329	2.43329	3.06699	3.88764	0	0	0.626502	0	0	0	2.37119	1.32952	1.72045	3.29753	1.19244	2.70194	4.03675	1.45343	4.54596	2.78446
cra_locus_10614_iso_2_len_1404_ver_3	50S ribosomal protein L7/L12	7.39759	15.1871	18.4243	13.425	24.8304	19.6748	16.8722	18.7442	13.7016	11.7816	15.5915	15.6338	8.84791	18.0511	13.2292	10.4997	16.3904	26.7036	14.4441	12.7125	8.8551	14.4509	8.2608
cra_locus_106151_iso_1_len_460_ver_3	Gene of unknown function	2.32072	4.03437	5.29664	5.17221	2.46402	2.70872	4.0354	1.99007	4.32969	3.79945	3.28011	3.85052	2.13266	2.91984	2.32523	5.25655	4.24488	3.05499	4.43909	5.40318	2.03422	6.07403	2.33685
cra_locus_10616_iso_1_len_1379_ver_3	Ubiquitin-protein ligase	2.80543	4.47768	4.05048	2.16498	2.01731	1.95837	1.80439	10.182	6.88547	6.8243	3.51148	2.39191	0.785909	5.43151	0	3.3585	1.02454	0	1.17693	0	0	1.46452	0
cra_locus_10617_iso_2_len_1531_ver_3	YA4	21.9733	2.15455	1.75117	1.3314	3.22832	2.21046	2.85743	2.24215	0	0.57632	0	0.614245	1.50694	3.65097	7.30195	7.06994	0	0.565873	0	0	0	0	0
cra_locus_106189_iso_1_len_299_ver_3	Gene of unknown function	0	0	0	0	9.10252	7.74238	9.23675	0	0	0	2.6205	0	2.6197	8.16814	0	3.31431	3.91734	0	3.20981	0	0	5.12583	0
cra_locus_106197_iso_1_len_307_ver_3	Gene of unknown function	6.61712	19.1085	23.9023	30.1569	13.8582	11.0582	16.0642	16.3169	20.0023	21.5741	17.5611	28.2088	20.1	8.32522	11.203	9.44221	5.85325	6.11469	11.9502	5.58901	5.12946	3.91154	4.28353
cra_locus_10619_iso_5_len_1125_ver_3	Vacuolar sorting protein SNF8	9.37947	7.91096	5.30496	7.50892	10.606	9.2001	14.9758	6.39628	9.69279	8.96999	5.87462	6.56592	6.51817	5.95204	8.40995	10.8864	10.0216	8.29779	12.52	10.0417	10.2085	11.7255	9.69507
cra_locus_1061_iso_3_len_770_ver_3	VQ motif family protein	19.2032	29.2524	41.0072	41.5189	25.0994	34.0193	6.88778	18.9213	21.8407	28.1201	78.6788	45.445	37.8	21.7632	20.0847	43.5557	19.3244	23.1698	24.8533	20.7935	22.6489	18.4103	41.7832
cra_locus_10620_iso_3_len_1857_ver_3	Gene of unknown function	4.79484	0	0	0	2.0712	1.14357	1.45947	0	0	0.439716	0	0	7.89348	11.2206	7.51851	8.48522	2.62596	2.46427	1.9754	1.27495	0	1.18972	0.551214
cra_locus_10621_iso_4_len_2586_ver_3	GTP binding protein	12.7591	14.2082	20.4647	23.793	37.7709	30.9221	34.1366	13.8425	14.7034	10.688	17.2111	20.3137	31.3411	29.9196	23.0811	34.9733	17.5639	17.6836	16.5512	20.9637	16.6875	29.1115	20.6346
cra_locus_106220_iso_1_len_477_ver_3	Respiratory burst oxidase	0	0	0	0	4.44802	3.84273	1.81244	0	0	0	0	0	0	0	2.81269	1.33164	18.8872	0	15.4759	8.09242	5.14179	12.7982	6.95191
cra_locus_10622_iso_1_len_872_ver_3	Flavoprotein wrbA	164.625	21.6568	7.80027	5.83925	121.501	125.958	109.116	41.4166	20.0841	15.4027	18.9683	10.6159	103.455	98.6062	69.9519	49.0424	149.788	84.6917	145.812	101.218	51.7879	180.942	138.543
cra_locus_106235_iso_1_len_383_ver_3	Integral membrane family protein	0	0	0	0	16.3245	9.37885	21.9541	0	0	0	0	0	0	0	14.7679	2.69639	11.9512	4.80193	23.8695	50.109	3.09863	31.2763	12.1618
cra_locus_10623_iso_6_len_1891_ver_3	General substrate transporter; Sugar transporter superfamily	4.00991	5.93541	6.24516	7.80704	10.0242	39.228	17.1004	4.50317	6.50762	10.128	5.16783	5.59899	7.14156	15.0074	4.26992	25.4714	2.44692	1.41505	3.41322	2.29474	3.24008	2.22982	4.47677
cra_locus_106247_iso_1_len_331_ver_3	Gene of unknown function	3.94055	7.37416	10.1919	10.6894	4.94749	13.0243	5.08811	6.25381	6.31947	6.75295	17.5568	9.00522	5.50313	5.00817	14.7694	5.23415	4.71234	1.96806	5.37926	3.42786	3.08605	2.94524	5.15566
cra_locus_10625_iso_1_len_1678_ver_3	Glycerol-3-phosphate dehydrogenase	7.44801	4.73959	3.98765	3.59149	9.58694	10.6263	8.79294	2.50074	3.22113	2.73721	3.38965	4.14021	9.52241	8.29484	6.02892	8.79127	6.16739	6.54594	6.17533	6.04601	4.39032	5.39538	4.11069
cra_locus_10626_iso_1_len_704_ver_3	Acyl-CoA-binding protein	267.558	147.266	129.718	115.428	289.804	250.99	136.188	174.418	142.751	138.226	77.4621	86.2456	191.814	160.646	136.268	190.109	230.581	241.006	347.408	182.229	129.517	155.679	87.5305
cra_locus_10627_iso_3_len_1392_ver_3	TPR Domain	2.97715	2.50867	3.09776	3.7808	2.72908	2.93209	3.27649	2.21868	4.50594	3.2662	2.33596	2.77523	2.90608	2.70968	2.96116	2.80124	4.29782	1.68367	3.28517	1.70992	0.965736	1.3055	1.61294
cra_locus_106286_iso_1_len_420_ver_3	Gene of unknown function	2.35238	0	1.77026	0	3.90728	4.08842	0	3.86709	0	0	13.3907	0	0	0	6.45608	0	3.5374	3.04327	2.03178	0	0	2.52827	3.51413
cra_locus_10628_iso_1_len_2034_ver_3	Multicopper oxidase	2.91437	0	0	0	31.3401	22.5082	57.8391	0	0	0	0	0	12.3119	35.7693	24.2408	18.8941	21.7096	6.57062	28.1318	36.6803	1.36772	54.5307	1.64472
cra_locus_10629_iso_6_len_2230_ver_3	Exoenzymes regulatory protein aepA	16.7894	17.0056	23.4917	21.9105	11.4076	11.2576	12.4112	17.1431	18.6276	13.4842	19.8984	20.4555	11.3441	12.3703	15.6294	13.9319	20.6265	20.7369	15.7829	11.4125	14.9013	11.2734	15.1074
cra_locus_1062_iso_1_len_943_ver_3	Gene of unknown function	15.2724	12.9601	18.7053	13.5483	25.5811	26.1675	15.4197	21.8067	13.1665	12.8532	15.4822	15.9486	14.0845	23.2172	17.5707	14.3596	16.5569	30.5942	15.7242	18.416	19.5621	18.7111	18.0397
cra_locus_106306_iso_1_len_338_ver_3	Gene of unknown function	2.27625	0	9.40816	12.6945	0	0	0	0	0	0	0	15.5259	20.3726	10.1464	3.72614	3.86133	0	0	6.77799	0	0	3.1992	2.96446
cra_locus_106309_iso_1_len_363_ver_3	Lipid transfer protein	0	0	0	0	0	4.60207	0	0	0	0	0	0	110.757	0	0	0	0	0	0	0	0	0	0
cra_locus_10630_iso_3_len_2862_ver_3	COP1-interacting protein 7 (CIP7)	17.4938	17.0483	19.4238	18.1357	28.7688	25.7827	28.8456	16.1814	16.347	13.2697	15.0348	16.5761	21.3469	26.7125	19.4265	28.0283	21.9411	22.8611	24.6514	27.925	18.1206	28.2643	15.1322
cra_locus_10632_iso_1_len_692_ver_3	DNA-directed RNA polymerase, subunit C11/M/9	16.4844	21.8266	21.7152	19.1414	30.6571	23.2766	23.7941	22.2876	32.1713	32.734	16.3278	18.3684	14.6158	19.1619	23.3263	27.2643	25.1566	21.9216	26.3611	46.089	41.5272	46.0728	36.7512
cra_locus_10633_iso_2_len_1106_ver_3	HAT family dimerisation domain containing protein	0	7.99356	7.58337	8.46241	3.02192	1.76972	2.01924	6.79606	6.04845	9.15647	4.9599	8.30874	2.00285	4.44159	1.50569	1.66164	2.56847	1.18376	2.54818	0	1.52749	1.88088	1.99783
cra_locus_106340_iso_1_len_291_ver_3	Gene of unknown function	8.8788	10.0201	10.6961	11.8855	18.2509	25.3394	5.86334	12.1971	6.17669	4.7188	8.37033	9.32783	16.4591	9.7888	9.14547	21.1719	19.7171	11.3534	21.5002	7.16522	0	5.28235	4.1955
cra_locus_10634_iso_1_len_763_ver_3	Conserved gene of unknown function	27.1998	0	0	0	14.3888	12.9836	5.61018	1.12363	2.71372	1.93748	0	0	4.62551	5.41882	88.5688	26.0901	44.8922	31.0333	61.6926	21.521	28.0954	27.4748	26.3324
cra_locus_10635_iso_1_len_613_ver_3	Gene of unknown function	1.94555	1.77741	4.50386	4.74126	0	0	1.48968	5.29587	4.26342	4.76437	6.17883	2.84362	0	0	0	0	0	0	0	0	0	0	0
cra_locus_10636_iso_5_len_1427_ver_3	Cuticular water permeability	16.2933	7.07554	7.7238	8.96778	8.59993	9.58757	9.08555	11.0123	14.6635	12.1185	7.89525	7.25933	9.81543	11.0714	15.7755	12.2046	14.9568	13.8009	11.7785	8.89124	8.23863	9.61683	10.6148
cra_locus_10637_iso_3_len_1219_ver_3	TRNA (Guanine-n(7)-)-methyltransferase	34.2815	51.1564	58.5728	58.6225	30.1419	28.0551	29.9739	58.3327	61.5833	73.8334	64.689	46.8275	28.055	32.103	37.6149	24.8156	34.5268	35.9261	30.1021	32.2065	34.1979	29.5735	30.3286
cra_locus_10638_iso_5_len_661_ver_3	BLE1 protein	166.252	87.3379	102.183	55.2514	173.206	157.698	163.992	116.904	54.104	71.9078	111.84	69.7786	80.2448	114.01	127.818	105.062	120.238	165.012	143.641	160.414	191.787	167.991	173.347
cra_locus_106397_iso_1_len_403_ver_3	Gene of unknown function	15.0452	18.2851	15.361	23.033	2.30885	4.10987	4.03196	11.2098	14.868	20.3348	26.8637	20.9681	4.34982	2.3464	5.5256	5.74245	2.61049	3.40886	3.66896	0	2.93293	3.43615	6.61295
cra_locus_10639_iso_8_len_3126_ver_3	Binding / calmodulin binding	0.681332	1.6364	1.31863	1.66394	7.57107	5.87638	14.2701	1.24275	1.31312	1.11803	0.845297	0.893699	1.62156	9.45069	2.47285	5.41291	4.15076	1.28987	4.85047	7.19094	0.956303	5.77747	1.36057
cra_locus_1063_iso_2_len_1593_ver_3	Conserved gene of unknown function	2.90588	6.79304	8.01042	6.09803	4.75669	5.18915	3.18916	8.74489	3.82072	4.98126	5.88106	7.8456	3.48232	5.90082	7.01156	6.33195	7.3349	10.9232	7.57301	7.20246	4.41852	4.55088	3.63127
cra_locus_106401_iso_1_len_325_ver_3	Protease inhibitor II	0	0	0	0	0	0	0	0	0	0	0	0	26.7634	0	0	0	0	0	0	0	0	0	0
cra_locus_10640_iso_5_len_1871_ver_3	Transcription initiation factor iia (Tfiia), gamma chain	12.1016	10.8727	11.0477	8.47639	10.71	11.4489	9.88677	10.7458	16.5358	16.4815	11.7923	9.81698	12.403	10.487	14.6141	9.74861	10.7774	14.3041	9.52748	9.27861	9.40893	7.78177	8.15563
cra_locus_10641_iso_2_len_1243_ver_3	Synaptotagmin	0.579375	0	0	0	1.4773	1.21549	1.76766	0	0	0.763973	0	0	1.63138	2.1932	0.562158	2.16222	1.27335	0	1.84419	3.09298	1.89746	1.22144	3.16909
cra_locus_10642_iso_3_len_2446_ver_3	Sand family protein	22.206	26.7782	18.7863	21.989	18.2755	19.5109	21.6203	17.0897	17.993	17.3444	18.1495	17.406	16.2417	13.7304	23.2232	24.0408	18.8842	18.954	21.3644	29.0885	23.327	25.8897	24.2932
cra_locus_10643_iso_2_len_2712_ver_3	S-receptor kinase	6.15055	2.61715	2.16707	2.12137	14.483	11.0913	14.0726	5.20012	6.40323	5.7844	1.10759	1.92566	18.0059	20.8939	16.0733	8.51616	11.0381	8.96509	12.5437	12.0647	7.76794	14.9223	11.335
cra_locus_10644_iso_3_len_3174_ver_3	Multidrug Resistance associated Protein 1	3.06221	3.3005	2.61903	2.51896	6.25165	4.51597	4.99762	4.34881	2.90283	3.36187	2.83464	3.05087	4.3856	6.15245	14.0151	17.2618	6.90721	3.91865	8.03728	9.9219	1.88342	8.58108	3.64077
cra_locus_106450_iso_1_len_326_ver_3	Gene of unknown function	1.82171	7.8123	7.45774	9.32289	0	0	2.14808	3.93396	2.79443	2.91459	4.2881	6.21276	0	1.85322	0	3.61561	0	0	3.16117	0	0	0	0
cra_locus_106453_iso_1_len_432_ver_3	Gene of unknown function	7.65253	1.81814	2.23281	0	2.47235	2.89873	2.30266	2.55814	0	1.53427	1.93124	3.89184	1.75513	1.76754	5.5499	2.81264	3.0283	5.06169	2.68811	0	0	0	2.50029
cra_locus_10645_iso_1_len_1262_ver_3	Conserved gene of unknown function	0	43.3308	48.8393	28.1331	0.915818	0.797841	0.752612	43.4222	3.029	3.761	1.60673	11.149	0	0	3.78198	0	14.9787	33.846	16.6348	8.40089	1.51237	5.77257	1.783
cra_locus_10646_iso_2_len_1356_ver_3	Glutaredoxin	10.0707	4.69333	3.7034	5.56422	30.3337	20.6644	33.6975	4.66133	9.50653	10.9497	4.53207	4.03244	50.4237	34.1794	7.06896	13.8467	6.13114	5.76449	6.803	7.51308	7.43951	8.19449	8.07641
cra_locus_106474_iso_1_len_312_ver_3	ATP binding protein	0	0	0	0	8.44967	4.77964	13.5261	3.4	3.5192	3.93271	0	0	0	5.06102	0	3.37287	2.87492	0	10.2079	5.94779	0	4.54106	0
cra_locus_10647_iso_1_len_2682_ver_3	Conserved gene of unknown function	15.4993	19.9542	15.1062	15.8582	19.504	20.3014	16.3523	17.7715	24.2132	16.2443	13.2813	14.5014	12.3974	12.3432	31.3773	12.7276	52.5023	38.4444	52.294	38.3117	22.0375	41.8076	23.7895
cra_locus_10648_iso_8_len_2596_ver_3	CYP72A54	44.5179	26.2112	25.0895	29.255	31.0896	40.8489	28.2242	23.9754	34.2704	57.7391	85.2911	65.3023	6.25475	15.3765	33.115	22.1709	49.5693	54.597	43.7062	39.267	81.2942	34.8703	74.8997
cra_locus_106499_iso_1_len_286_ver_3	Gene of unknown function	2.10524	0	0	0	4.39379	2.87083	0	0	0	0	0	0	0	3.65054	5.84354	0	4.43207	0	0	0	0	0	0
cra_locus_1064_iso_4_len_1063_ver_3	Ankyrin repeat family protein	39.2966	41.3951	54.8248	39.1264	38.2226	41.8017	33.6547	45.2652	31.0627	30.8557	50.3623	51.3049	27.294	36.076	51.9039	39.9833	29.979	51.7856	35.2023	35.5628	27.7942	34.1309	24.4507
cra_locus_10650_iso_3_len_1923_ver_3	Chromosome 11 contig 1, DNA sequence	8.25568	8.5109	6.76091	5.88833	8.20653	6.81708	5.75695	10.2694	6.61677	7.70438	7.84491	7.6477	7.91718	8.59406	5.24698	5.98466	5.88508	5.56456	5.52904	5.81082	3.64866	5.42817	4.59459
cra_locus_10651_iso_1_len_1113_ver_3	Ccr4-associated factor	58.8464	66.5794	49.678	64.7098	43.9353	44.5813	42.054	58.1404	53.2114	58.9219	46.995	51.1513	49.0033	24.6748	74.5892	51.6776	79.5589	65.941	86.9446	83.7312	86.721	78.2453	90.2496
cra_locus_106520_iso_1_len_263_ver_3	Gene of unknown function	5.78042	11.2203	12.1278	10.1894	3.69021	2.89025	0	5.58053	0	0	15.723	20.1078	0	2.36305	6.67777	2.54947	6.95386	5.44834	0	0	0	0	0
cra_locus_10652_iso_3_len_2341_ver_3	Glucose-6-phosphate isomerase	92.7175	68.2427	43.2907	44.7444	81.8231	97.9961	104.432	72.5337	76.5689	86.2209	49.4541	48.8832	80.2157	69.9236	92.4071	88.4543	137.243	134.476	129.447	167.113	263.886	177.529	226.865
cra_locus_106533_iso_2_len_913_ver_3	Retrotransposon protein, Ty1-copia subclass	1.25273	171.646	88.8247	164.236	1.01252	0	3.60023	76.9621	126.837	184.608	77.312	112.236	1.91633	4.48343	2.95707	6.39643	1.97583	0	3.06085	3.7334	4.03145	0	0
cra_locus_106535_iso_1_len_325_ver_3	Gene of unknown function	2.01065	0	0	0	0	0	0	0	3.08425	2.29777	0	0	0	0	0	0	0	0	0	0	0	0	0
cra_locus_10653_iso_5_len_2306_ver_3	Binding protein	15.2073	48.6436	40.4603	54.2146	15.5776	15.1481	20.9629	36.4017	37.6154	44.4791	23.8021	34.7239	16.5258	15.553	21.239	26.2525	13.0419	12.094	14.0826	16.7748	13.9222	15.1083	13.0745
cra_locus_10654_iso_2_len_1746_ver_3	Conserved gene of unknown function	4.94726	7.78799	7.94163	9.04868	4.60363	3.50926	5.53972	11.248	10.3924	9.90303	6.34599	7.20022	4.49025	5.21542	8.43606	4.30841	5.16498	6.83121	5.97282	5.88197	4.98307	4.54838	3.25434
cra_locus_10655_iso_3_len_1140_ver_3	Syringolide-induced protein 1-3-1B	26.8332	76.9424	82.9858	92.9058	9.56598	14.4439	11.1194	51.6548	54.3834	99.6195	97.6603	107.871	6.62116	6.31166	46.3443	11.4375	16.1842	28.0764	14.0411	15.2671	30.9032	10.1436	29.3521
cra_locus_106560_iso_1_len_265_ver_3	Hemoglobin subunit alpha-2	18.1113	28.9773	4.69269	156.109	3.65894	0	33.9142	2.91223	63.6526	32.4874	3.29784	0	8.0922	0	0	54.3491	0	0	0	148.132	97.6068	139.068	63.6554
cra_locus_10656_iso_1_len_495_ver_3	Gene of unknown function	2.5543	2.09646	2.67362	1.98061	0	2.11102	1.36906	0	4.98679	4.37858	1.67015	0	3.33927	1.17384	0	2.81645	1.74593	0	4.02948	0	3.29545	2.12136	2.55541
cra_locus_106576_iso_1_len_496_ver_3	Gene of unknown function	5.09766	5.62216	2.96433	3.95274	1.70682	2.76479	4.34676	0	2.13262	1.7212	4.09068	2.37069	3.18066	2.92824	2.32924	3.44916	3.13594	2.548	3.09296	0	0	0	0
cra_locus_106579_iso_1_len_444_ver_3	Gene of unknown function	4.95386	3.67827	3.83613	3.33602	1.92069	2.37045	1.53697	2.40077	1.99987	2.90513	3.32437	6.89009	0	4.75147	2.00287	1.86879	4.21481	3.58385	2.08831	0	0	0	0
cra_locus_10657_iso_1_len_1325_ver_3	Zinc finger protein	5.67765	1.79032	1.70907	2.0178	3.22893	4.07993	2.77461	2.54551	8.19699	6.20217	1.52863	2.3492	0.600347	1.84432	4.29935	4.23495	2.63667	3.41026	1.89468	2.79738	0	3.66131	1.90837
cra_locus_106584_iso_1_len_296_ver_3	Conserved gene of unknown function	0	0	0	0	0	0	0	0	0	0	0	0	0	0	0	0	0	0	0	0	0	0	0
cra_locus_1065_iso_1_len_1776_ver_3	Multidrug resistance pump	108.086	17.4755	30.3097	23.9062	9.42936	7.4259	6.80574	14.1627	11.0691	9.02512	11.2185	19.0645	19.3126	22.8633	7.80309	20.4892	7.96371	1.21629	8.14394	8.15264	2.07202	6.39419	2.67412
cra_locus_10660_iso_1_len_292_ver_3	Gene of unknown function	0	0	0	0	0	0	0	0	0	0	0	0	0	0	0	0	0	0	0	0	0	0	0
cra_locus_106613_iso_1_len_382_ver_3	Gene of unknown function	0	4.67026	6.66681	6.10081	0	0	0	6.61976	0	5.42991	4.40957	4.96581	0	0	0	0	0	2.64854	0	0	0	0	0
cra_locus_10661_iso_2_len_2550_ver_3	Urea active transporter	9.01388	4.91671	1.48264	0.640694	3.92588	3.65829	0.759199	10.1962	3.02876	3.53179	1.48748	0.951506	6.20061	4.83928	2.56624	3.14735	11.6505	20.7007	6.56031	6.77953	0.957244	6.62695	0.981057
cra_locus_10662_iso_2_len_3243_ver_3	Beta-galactosidase	178.778	77.1314	39.0235	46.0549	69.4101	75.2954	27.9886	14.4343	4.09288	7.21425	95.4315	97.8858	20.0708	20.084	20.7559	34.1723	24.5043	25.4136	24.8525	30.859	8.3958	30.4809	19.7226
cra_locus_106638_iso_1_len_319_ver_3	Gene of unknown function	0	22.9499	26.9708	34.7438	0	0	0	15.4047	12.5923	17.3764	29.0334	33.4043	0	0	0	0	0	0	0	0	0	0	0
cra_locus_10663_iso_1_len_1502_ver_3	Conserved gene of unknown function	37.2819	15.7519	19.4541	13.785	24.5312	35.4793	23.1127	16.0973	24.8476	17.4201	15.8031	12.5894	9.50774	13.3073	29.7076	14.5803	21.7071	43.7377	26.8682	34.3694	11.0957	16.5766	10.0743
cra_locus_10664_iso_2_len_1168_ver_3	Gene of unknown function	3.56265	11.7937	11.3032	11.007	6.06503	5.93784	3.41166	9.35289	7.86954	7.32851	12.9208	14.0941	4.03649	6.96705	6.79249	6.75666	10.2861	6.71595	8.9404	3.06929	2.69654	2.69053	2.57353
cra_locus_10665_iso_1_len_866_ver_3	Gene of unknown function	0.839262	2.22299	1.90045	2.24929	1.74496	1.946	1.24629	1.47667	1.48618	1.88207	2.66167	2.09299	1.43601	1.26714	1.49665	1.46106	1.21356	1.42092	1.94008	0	1.50571	1.29749	1.64031
cra_locus_106662_iso_1_len_296_ver_3	Gene of unknown function	0	29.7292	48.7372	43.7861	0	0	0	44.7895	29.8407	37.9785	46.9041	60.8153	0	0	0	0	0	0	0	0	0	0	0
cra_locus_106665_iso_1_len_426_ver_3	Gene of unknown function	5.58764	7.07488	18.6555	11.2368	0	0	0	11.4259	11.0799	13.2384	46.872	26.7251	0	0	0	0	0	0	0	0	0	0	0
cra_locus_10666_iso_1_len_417_ver_3	Subtilisin-like serine protease	4.48794	3.94278	6.01776	4.29079	6.1104	5.70689	4.82999	3.74037	4.47224	3.41659	3.44749	3.78933	5.57453	5.62185	4.69225	6.88234	4.93145	3.56239	4.98605	3.1004	2.61857	4.66737	2.7348
cra_locus_10667_iso_1_len_1721_ver_3	Pentatricopeptide repeat-containing protein	4.25291	13.8574	13.868	18.4102	7.22339	6.68616	4.83318	8.36767	10.4969	10.0493	13.7995	17.285	10.2001	11.8043	8.69537	7.40432	6.92427	6.63075	6.23181	5.28016	6.67744	5.43354	6.11761
cra_locus_10668_iso_1_len_1417_ver_3	Conserved gene of unknown function	1.83208	2.11156	1.89499	2.16112	3.06277	5.35988	5.43211	2.32727	4.84334	3.60829	3.21144	1.39586	5.70747	4.14756	12.9001	9.58476	6.15477	4.34768	5.72354	11.7538	13.2768	6.62359	10.5593
cra_locus_1066_iso_2_len_1865_ver_3	X7	29.1446	13.5355	10.8953	8.71355	24.2396	33.9231	34.4641	26.9899	52.7078	51.8625	23.7001	14.4218	7.62794	10.1076	18.1883	21.478	26.7212	31.4793	25.2536	35.6137	59.3266	29.2366	57.1762
cra_locus_106701_iso_1_len_326_ver_3	Gene of unknown function	0	18.5028	40.7845	67.073	0	0	0	7.86793	3.07387	0	18.5818	28.8893	0	0	0	0	0	0	0	0	0	0	0
cra_locus_106716_iso_1_len_313_ver_3	Gene of unknown function	0	17.4148	12.1861	8.1247	5.84716	0	0	12.5841	0	2.39486	10.2144	0	0	0	0	0	38.9612	7.78115	39.9248	20.9719	18.9256	23.3215	21.6103
cra_locus_10671_iso_3_len_626_ver_3	Thylakoid lumenal 17.9 kDa protein, chloroplast	6.43456	3.37514	6.02896	6.82819	45.1726	24.0991	5.24607	2.07222	0	0	2.72585	4.94523	55.8035	66.4541	2.48745	9.79304	0	0	1.3307	0	0	0	0
cra_locus_10672_iso_1_len_675_ver_3	Conserved gene of unknown function	0	0	0	0	6.73455	6.66231	0	0	0	0	0	0	8.376	7.26022	0	0	0	0	0	0	0	0	0
cra_locus_10673_iso_1_len_1893_ver_3	DNA binding protein	2.29306	3.50501	2.82216	3.67239	5.70161	4.09011	7.00086	3.17096	2.58245	3.11808	3.11255	3.91014	2.0491	8.58721	5.17932	6.56106	4.75765	6.15569	3.25458	2.4312	2.94237	2.4926	2.06399
cra_locus_106740_iso_1_len_424_ver_3	Neuroblastoma-amplified gene	18.0806	29.2157	25.0584	27.0659	11.0987	17.122	14.5363	26.2735	23.1124	26.6108	23.286	27.5611	14.3254	11.2391	16.5555	16.4625	18.5378	14.6319	13.1643	13.1118	12.7742	11.262	12.7547
cra_locus_106746_iso_1_len_291_ver_3	Transcription factor	3.92362	3.49576	3.17025	4.1099	0	2.3467	0	3.93485	3.80127	4.71992	0	5.28203	0	0	2.20379	0	0	0	3.58347	0	0	0	0
cra_locus_106749_iso_1_len_451_ver_3	Gene of unknown function	0	15.6265	13.1217	13.4873	2.99064	3.93378	1.92411	10.5862	13.5702	7.32594	17.7722	10.494	2.34655	2.59539	5.56866	0	12.7246	3.82675	16.6005	3.37504	0	2.81105	0
cra_locus_10674_iso_1_len_1008_ver_3	Transcription factor Myb	0	0	0	0	3.66382	2.82611	0	0	0	0	0	0	0	0	13.6651	0	16.9535	3.73314	28.6227	11.2418	8.0672	7.97709	4.95903
cra_locus_106753_iso_1_len_499_ver_3	Embryogenic cell protein 40	0	0	0	0	13.9914	30.611	79.5933	0	0	0	0	0	0	0	0	0	0	0	0	0	0	0	0
cra_locus_106759_iso_1_len_391_ver_3	Gene of unknown function	3.28813	0	3.05932	0	2.93586	3.39688	0	12.9104	2.98047	2.39125	3.12723	4.84235	1.95392	12.4295	28.2394	15.4912	22.9247	25.5922	9.77573	0	3.63618	4.91546	3.03652
cra_locus_10675_iso_2_len_885_ver_3	Rac-like GTP-binding protein ARAC2	1.51695	0	0	0	8.69096	7.61362	4.2008	0	0	0	0	0	3.47049	5.5958	45.7226	20.2111	11.3106	1.98584	9.02758	6.20167	3.97247	7.39105	6.95573
cra_locus_106761_iso_1_len_563_ver_3	Gene of unknown function	0	15.093	31.8216	20.1643	0	0	0	24.3895	10.2577	14.0681	26.8306	36.8002	0	0	0	0	0	0	0	0	0	0	0
cra_locus_10676_iso_3_len_2032_ver_3	GRF domain class transcription factor	2.45808	1.76807	1.24404	1.22878	28.3205	18.6937	109.047	1.13232	1.5331	1.38911	0.812448	0.829092	7.23915	20.6381	4.50718	21.8318	6.58031	5.98311	6.20167	9.37315	2.62865	16.3361	5.21347
cra_locus_10677_iso_3_len_3208_ver_3	LIGULELESS1 protein	7.012	48.4786	43.1546	40.7433	9.36076	8.83863	7.38889	35.4561	20.8596	21.5115	31.1592	40.1658	6.63041	8.37112	8.49383	10.0587	18.1199	15.2663	13.7671	20.4869	11.4212	31.1275	17.6345
cra_locus_10678_iso_1_len_983_ver_3	Conserved gene of unknown function	6.86234	8.51246	27.7884	12.174	2.15842	1.67565	2.49259	8.35694	1.73993	2.78693	5.19157	24.4672	9.78679	9.86482	0.775855	1.56335	0	1.24729	1.51406	0	0	0	0
cra_locus_106796_iso_1_len_414_ver_3	Gene of unknown function	1.40532	6.02663	5.9329	12.9854	0	0	0	0	5.60482	6.26339	5.32949	8.8665	2.38835	1.99367	0	0	2.11325	0	2.25103	0	0	0	0
cra_locus_10679_iso_2_len_1621_ver_3	Dimethylmenaquinone methyltransferase	50.5023	15.9168	11.2174	10.0974	50.0264	46.3444	46.0853	21.3266	25.1799	25.5169	9.59974	11.5904	28.8792	30.9271	54.6388	61.8686	36.3361	38.7065	32.4812	56.8503	47.9556	56.0718	41.1402
cra_locus_1067_iso_4_len_1465_ver_3	CAPIP1	29.8953	36.4174	31.6918	26.7798	54.1406	55.445	34.0268	30.4866	14.275	16.986	23.1068	41.2448	22.7803	16.4493	66.194	44.5962	68.8649	99.6101	81.3973	128.619	69.8161	114.824	68.5085
cra_locus_10680_iso_2_len_1476_ver_3	Pentatricopeptide repeat-containing protein	0.822601	1.01273	1.57855	1.06308	2.70836	1.65713	1.20245	2.04239	2.12218	1.9656	1.41801	1.91278	0.928752	2.62689	1.49253	1.19563	1.18076	0.998549	0.848481	0	0.98548	1.1614	0
cra_locus_106812_iso_1_len_362_ver_3	Gene of unknown function	0	7.51781	2.74492	0	0	2.03099	4.18005	7.63652	0	8.07679	30.8086	11.3593	0	0	0	0	0	0	0	0	0	0	0
cra_locus_10681_iso_3_len_658_ver_3	Leucine-rich repeat protein	14.2788	75.1349	17.4969	7.21449	39.6008	58.0624	41.6776	106.098	74.6818	49.4451	104.162	23.3216	0	0	66.1677	3.50927	339.022	271.873	178.198	114.863	147.883	158.42	258.931
cra_locus_10682_iso_4_len_3210_ver_3	Phytoene dehydrogenase	19.2879	20.769	21.2156	18.0376	14.972	13.3559	7.87652	16.1829	20.6899	17.0467	28.2258	25.3489	30.1961	21.8262	13.7314	13.8032	9.46346	11.7565	11.6924	9.23976	9.37947	6.74367	8.69654
cra_locus_10683_iso_1_len_572_ver_3	Gene of unknown function	0	0	0	0	0	0	0	1.26572	0	1.36643	0	0	0	0	1.26329	0	0	0	0	0	0	0	0
cra_locus_10684_iso_1_len_554_ver_3	60S ribosomal protein L10	0	0	0	0	0	0	0	0	0	0	0	0	0	0	0	0	0	0	0	0	0	0	0
cra_locus_106853_iso_1_len_769_ver_3	Gene of unknown function	0	61.3893	61.0324	40.4317	0	0	0	86.4679	59.3529	87.3149	44.8902	73.1218	0	0	0	0	57.6118	0	121.897	148.201	114.138	67.1949	50.2571
cra_locus_10685_iso_5_len_1925_ver_3	MYC1	16.8935	6.18322	6.64426	5.35476	14.6791	9.72842	13.276	7.21361	13.2196	9.94643	3.881	3.74683	15.3327	16.5404	3.53422	11.9882	8.53939	7.35181	7.2373	7.10221	2.95056	9.59356	4.27565
cra_locus_10686_iso_2_len_1342_ver_3	Chloroplast iron superoxide dismutase	8.36501	7.6731	6.00971	7.02944	41.888	22.992	92.6293	10.7307	9.86073	10.6426	3.44877	4.21597	34.477	67.1046	3.29086	13.54	3.96577	2.65404	4.45535	4.04313	3.34171	4.51738	2.30225
cra_locus_106875_iso_1_len_368_ver_3	Sinapyl alcohol dehydrogenase-like 1	0	2.70174	4.49197	0	5.58407	23.3964	5.13218	0	0	0	5.63524	0	2.19056	0	19.6705	5.27944	0	0	0	0	11.0015	0	14.0504
cra_locus_106877_iso_1_len_412_ver_3	Splicing endonuclease positive effector sen1	2.82531	6.53637	3.7952	6.62704	3.12174	4.33435	2.8772	6.81903	9.31792	8.55623	4.80312	6.26305	0	3.57896	2.69702	3.58257	2.33672	2.663	4.90271	0	0	3.09729	0
cra_locus_10687_iso_3_len_2094_ver_3	ERD6-like transporter	3.2489	18.8944	15.2177	24.6199	12.6736	9.52773	15.3913	17.9061	29.7012	29.3435	8.63434	12.6438	21.8532	26.1901	15.919	21.0318	6.69794	4.28058	7.76416	6.52096	2.65597	6.4627	2.61719
cra_locus_106889_iso_1_len_330_ver_3	Gene of unknown function	12.4027	62.2764	12.6477	42.1621	13.682	8.37484	36.0321	15.5267	76.1013	80.1131	9.63754	17.1646	18.5642	8.22678	16.0728	56.6847	45.6807	16.9424	17.9952	6.45243	0	0	0
cra_locus_10688_iso_2_len_1683_ver_3	RNA polymerase I, II and III 16.5 kDa subunit	38.3705	25.1768	29.3357	24.5994	37.268	41.113	29.1744	33.284	26.5944	28.9716	25.923	25.9375	27.7967	27.7625	37.0255	34.4817	32.9081	39.1569	33.4249	26.9291	30.1751	26.8356	32.2323
cra_locus_106892_iso_2_len_1051_ver_3	Conserved gene of unknown function	0	108.855	71.5199	81.053	0	0	0	99.3943	82.5072	123.964	57.8767	93.117	0	0	0	0	0	0	0	0	0	0	0
cra_locus_106895_iso_1_len_292_ver_3	Ataxia telangiectasia mutated	2.26293	6.73277	6.84276	5.26406	2.52562	3.27289	0	8.62375	0	2.82118	6.72563	11.9271	0	2.09744	5.04907	2.94886	5.25903	0	5.49207	0	0	0	0
cra_locus_10689_iso_3_len_1355_ver_3	Cytochrome c oxidase assembly protein CtaG	23.3393	24.4974	19.2618	24.9419	18.785	19.289	19.4202	23.5834	20.0288	21.1699	17.555	17.9509	17.4963	16.3038	22.2519	21.9554	22.641	19.4217	19.7708	17.8692	18.0337	18.3397	16.9249
cra_locus_1068_iso_3_len_2298_ver_3	Aspartyl-tRNA synthetase	38.6053	53.3091	37.8269	33.9316	84.3397	60.5894	94.4739	56.976	67.4856	68.5072	37.8247	33.5452	38.3429	48.2102	45.9553	174.267	58.6267	55.9635	56.5607	61.8576	56.852	85.0879	50.1407
cra_locus_10690_iso_4_len_4108_ver_3	DNA-directed RNA polymerase II subunit RPB2	88.8569	85.3393	108.925	107.8	67.9545	75.2153	66.3019	68.3917	66.1677	65.196	123.901	83.5289	49.1429	54.0475	73.32	78.4807	48.11	59.0729	50.7616	45.6461	41.9511	50.1426	45.7896
cra_locus_10691_iso_2_len_1271_ver_3	Pectate lyase 17	55.3245	0	0	0	1.33703	1.3861	1.54101	0	0	0	0	0	1.9363	2.36229	0.503647	1.05674	0	0	0	0	0	0	0
cra_locus_10692_iso_1_len_1517_ver_3	UDP-sugar:glycosyltransferase	15.126	4.26758	8.41956	5.3757	23.7483	23.9654	12.7845	6.8821	4.79672	6.52382	8.9393	7.00627	27.1424	33.3149	8.40204	26.421	10.6621	5.48349	10.7749	5.30793	2.43267	5.97915	1.47745
cra_locus_106935_iso_1_len_346_ver_3	Gene of unknown function	26.6257	46.9983	81.4448	33.2404	39.6023	36.4635	13.1731	73.8234	15.7087	14.8238	108.028	110.012	8.47889	23.7616	15.4301	17.8785	26.179	34.5875	27.7947	8.16901	9.34281	7.17247	6.06825
cra_locus_106939_iso_1_len_362_ver_3	Gene of unknown function	1.78724	2.3837	0	5.08139	0	0	0	2.6831	3.73849	3.52789	0	3.04761	0	0	0	0	0	0	0	0	0	0	0
cra_locus_10693_iso_1_len_2965_ver_3	Conserved gene of unknown function	2.4325	0.436732	0	0.288165	9.90927	7.8111	8.63257	1.24067	1.10245	2.06384	0	0.314235	3.25231	6.88656	6.78257	10.4441	9.58809	3.79231	7.96986	9.43748	2.20429	10.5724	4.30553
cra_locus_10694_iso_2_len_1845_ver_3	Monosaccharid transporter	28.0653	68.221	38.3439	51.8829	44.2581	41.2712	31.3944	265.945	130.25	248.141	124.676	89.5669	35.6775	26.1755	78.9671	22.0102	107.659	75.6336	103.797	127.055	36.3625	149.154	45.3973
cra_locus_106953_iso_1_len_281_ver_3	Disease resistance protein SlVe2	6.01163	0	0	0	4.48097	6.34355	0	0	0	3.43505	0	0	15.1568	5.91529	0	5.68168	0	0	0	0	0	0	0
cra_locus_106956_iso_1_len_296_ver_3	Gene of unknown function	0	2.28686	2.85164	3.74487	0	0	0	0	3.10841	3.01049	0	0	0	0	2.16173	0	0	0	0	0	0	0	0
cra_locus_10695_iso_5_len_1882_ver_3	Lysosomal Pro-X carboxypeptidase	70.7186	113.65	70.4498	68.9858	60.5449	54.9802	87.0755	103.371	88.3244	73.9101	61.8951	52.1792	49.9283	55.2852	71.6242	78.9747	57.0795	62.748	55.1886	63.7262	45.5815	53.2955	43.6504
cra_locus_10696_iso_1_len_2994_ver_3	Zinc finger protein	10.8574	0.288307	0.280137	0	19.8487	17.7504	21.6735	0.62586	0.39188	0.417072	0	0	11.1644	20.6401	15.7666	38.3097	13.5006	7.02312	13.1288	13.0134	13.5033	12.8695	10.7512
cra_locus_10697_iso_1_len_789_ver_3	Gene of unknown function	0.996666	0.964094	1.00183	0	1.83539	1.45619	0	2.07995	0	0.813564	0	0	2.69898	2.58027	3.07567	2.82589	1.8199	2.79586	1.14033	0	0	0	1.80793
cra_locus_10698_iso_1_len_2714_ver_3	Mitogen activated protein kinase kinase kinase 3, mapkkk3, mekk3	2.84125	6.14004	3.66065	3.19397	8.8565	7.90013	11.8264	6.39932	5.10022	5.25044	3.37298	2.85197	2.34456	6.74405	6.55134	8.99864	9.66626	6.64759	9.8715	9.45171	5.55607	12.2971	6.65263
cra_locus_10699_iso_1_len_982_ver_3	Chloroplast methionine sulfoxide reductase B1	46.6674	66.5693	70.3792	66.4219	44.3987	45.5482	17.7098	32.1647	30.6548	23.0974	41.9473	66.4114	69.3958	32.7081	14.2191	21.2839	17.0745	38.1716	16.0659	9.64637	8.28729	15.0409	11.0537
cra_locus_1069_iso_7_len_1706_ver_3	BZIP transcription factor bZIP109	130.955	97.9788	80.1961	69.9884	72.6819	84.2145	75.7746	102.704	89.8736	135.055	189.098	99.6315	50.5709	41.6535	56.739	61.5786	65.8353	76.1247	76.8717	124.962	224.42	113.415	171.569
cra_locus_106_iso_7_len_2911_ver_3	Hypothetical CTC00065	94.9308	357.343	44.9144	211.635	513.92	403.434	595.54	66.0313	410.491	65.3426	28.3798	34.5383	387.372	92.095	32.3418	2278.86	114.883	47.4805	61.5198	50.8487	49.5974	45.4728	32.3345
cra_locus_107008_iso_1_len_292_ver_3	Gene of unknown function	0	0	2.89501	3.50938	0	0	0	0	0	0	0	4.56036	0	0	0	0	0	0	0	0	0	0	0
cra_locus_10700_iso_2_len_1339_ver_3	Nucleus protein	10.9861	12.1652	10.9374	9.21792	9.22834	10.2786	6.95093	10.3355	8.55287	9.01504	10.586	9.64852	6.26327	8.37626	11.9351	6.51224	24.6565	14.5982	21.0598	15.5177	14.2348	20.2238	12.5865
cra_locus_107012_iso_1_len_290_ver_3	Gene of unknown function	1.01737	8.15318	20.5345	6.88025	2.68574	2.47263	1.63325	13.6445	7.41592	8.19964	19.922	20.874	0	2.11131	1.46342	0	3.43781	0	3.51476	0	0	0	0
cra_locus_107013_iso_1_len_374_ver_3	Gene of unknown function	103.348	36.0159	55.5743	42.1354	216.214	225.262	53.2911	58.768	35.2423	22.2233	15.9965	35.5667	83.648	175.075	405.79	179.837	192.011	416.348	208.541	32.6512	8.39739	25.2153	11.2839
cra_locus_10701_iso_1_len_1936_ver_3	BZIP transcriptional activator RSG	33.3083	35.1563	35.026	30.1686	30.3731	31.2415	20.5898	37.7701	28.7674	32.9095	37.1763	38.7519	15.7264	18.3794	53.1832	40.7937	43.9866	74.3866	35.8263	35.9852	39.2865	40.9003	40.445
cra_locus_107021_iso_1_len_285_ver_3	Gene of unknown function	3.00232	3.8162	6.75949	0	2.38858	0	2.37856	4.75315	2.91777	4.70949	6.2176	9.91026	0	2.47907	1.91773	0	6.5148	3.05557	3.94957	0	0	1.3173	1.25194
cra_locus_10702_iso_1_len_1894_ver_3	Conserved gene of unknown function	7.9489	16.9263	12.9156	15.5065	6.16156	8.80221	14.8961	8.80759	15.8424	13.6592	14.5301	11.8725	7.28177	5.52777	11.4797	11.6436	5.88935	7.3373	7.08653	8.46992	12.3513	6.09564	10.6091
cra_locus_10703_iso_1_len_1548_ver_3	Gene of unknown function	0	0	0	0	0	0	0	0	0	0	0	0	0	0	0	0	0	0	0	0	0	0	0
cra_locus_107042_iso_1_len_819_ver_3	Disease resistance protein	4.3137	4.52102	3.50446	4.62422	3.32089	5.83687	5.90986	1.82676	4.67463	4.50026	2.41795	3.38674	0	0	21.3181	1.01884	15.2412	8.92925	14.9918	8.19486	5.8317	7.38257	7.8847
cra_locus_10704_iso_2_len_774_ver_3	Gene of unknown function	6.53614	2.70464	3.80927	3.92312	3.83386	3.7963	5.83874	6.36547	9.35777	5.80961	5.50834	4.2105	3.70274	2.04755	2.90841	3.92379	6.44329	9.92549	2.61739	4.51872	4.85882	4.64421	4.79525
cra_locus_10705_iso_1_len_845_ver_3	Gene of unknown function	0	0	0	0	0	0	0.710762	0	0	0	0	0	0	0	0	0	0	0	0	0	0	0	0
cra_locus_10706_iso_3_len_2060_ver_3	Terminal deoxycytidyl transferase rev1	14.0248	18.9847	16.784	24.7472	7.11298	6.46309	9.89458	15.295	33.446	26.7742	11.0429	16.9657	9.8902	7.42512	6.05222	7.29901	4.42649	3.8918	6.13375	5.76926	4.75276	6.08404	5.72771
cra_locus_10707_iso_1_len_999_ver_3	Pentatricopeptide	0	1.19601	0	1.1101	0.821737	1.01416	4.00606	1.34623	0.941175	0.828662	0	0	0	0.841149	1.05645	0	0	2.54106	1.04236	0	0	1.42678	0
cra_locus_10708_iso_1_len_4330_ver_3	ATP binding / ATP-dependent helicase/ helicase/ hydrolase, acting on acid anhydrides, in phosphorus-containing anhydrides / nucleic acid binding	14.7433	13.3163	10.9434	13.3942	9.94581	10.6213	12.1094	14.0302	20.0491	17.6536	9.95255	11.7335	12.367	13.7804	11.5885	11.4017	10.9716	8.89267	11.3175	9.96453	6.29942	9.83727	8.11445
cra_locus_107090_iso_1_len_364_ver_3	Gene of unknown function	0	0	0	0	0	0	5.88638	0	0	0	0	0	4.01165	3.93556	1.71628	2.31507	0	0	0	0	0	0	0
cra_locus_107094_iso_1_len_304_ver_3	Gene of unknown function	2.75442	3.55254	0	0	3.86466	0	4.85076	0	0	3.37259	0	3.69038	0	4.40928	5.2442	6.94198	5.3254	5.87232	4.46455	0	0	0	0
cra_locus_10709_iso_1_len_1536_ver_3	Aspartic proteinase nepenthesin-2	3.26711	1.01293	0.643026	1.07179	4.84845	3.0191	1.34701	4.92548	3.35943	4.96452	1.26765	1.04075	3.33242	2.70209	5.01516	4.2754	25.7524	14.0435	22.9074	13.0596	4.8768	9.31484	2.06666
cra_locus_1070_iso_3_len_2634_ver_3	Glycerol-3-phosphate acyltransferase 2	15.7641	6.46924	5.81902	8.97574	9.81695	9.70048	14.4049	5.93626	8.57026	9.06695	8.69142	7.47285	12.3543	11.9259	10.7829	10.9697	17.74	12.5615	17.3274	11.7798	6.94783	12.5988	5.83719
cra_locus_107102_iso_1_len_468_ver_3	Abc transporter	11.3386	14.6042	14.821	13.3154	0	0	0	17.3779	12.6666	11.831	10.6372	7.35554	0	0	0	0	0	0	0	0	0	0	0
cra_locus_10710_iso_5_len_2155_ver_3	Conserved gene of unknown function	6.99849	6.17486	5.46965	5.57137	12.8099	14.3153	19.1781	5.3664	5.93375	5.49673	3.89378	3.55846	8.08459	11.6596	12.2567	10.3826	12.7436	15.2318	9.9193	14.0685	27.3455	13.0195	26.7997
cra_locus_107115_iso_1_len_279_ver_3	Gene of unknown function	0	10.258	10.2441	20.9206	0	0	0	3.84881	9.29538	10.1403	19.245	18.8209	0	0	0	0	0	0	0	0	0	0	0
cra_locus_107116_iso_1_len_309_ver_3	Callose synthase 7	4.05785	3.4891	3.46086	6.59261	5.69347	5.48961	7.04264	3.43643	6.22459	6.18309	2.52691	3.62448	5.30489	7.08401	7.6203	11.5054	10.4606	0	6.7062	0	0	7.06109	6.87012
cra_locus_10711_iso_1_len_2230_ver_3	Pentatricopeptide repeat-containing protein	5.85049	21.4443	18.2084	16.529	7.75598	7.65402	6.42961	23.9192	14.8568	17.5014	20.4449	17.8148	5.68811	7.54047	8.15001	7.23698	6.46889	6.75783	7.21879	7.70637	5.43225	8.62345	5.32713
cra_locus_107126_iso_1_len_290_ver_3	Gene of unknown function	0	3.97704	8.75159	4.42033	0	0	0	5.00324	3.17987	0	12.7411	11.665	0	0	0	0	3.11725	5.86166	0	0	0	0	0
cra_locus_10712_iso_1_len_1225_ver_3	RING-H2 finger protein ATL2J	9.49999	0.561582	0.578739	0.900329	8.38628	8.32805	5.33428	1.20677	0	0.775471	0	1.1571	6.50543	9.58694	15.8832	3.9406	4.62583	3.41114	2.47579	2.48998	0.917153	5.95116	3.67632
cra_locus_107131_iso_1_len_300_ver_3	Protein kinase	2.39578	3.15435	0	0	4.1668	2.72252	4.28031	3.55056	7.04381	8.67002	2.87192	0	0	8.34087	4.47137	0	4.50333	6.89989	4.26395	0	0	3.6478	0
cra_locus_10713_iso_3_len_1069_ver_3	Tyramine N-feruloyltransferase 4/11	26.6362	9.45244	11.3809	6.87787	53.9693	65.5628	32.2894	18.7682	13.8058	11.4149	20.954	10.3792	22.1037	38.2196	51.603	50.3648	24.4863	32.0363	22.4301	26.6427	35.1224	28.9912	26.5997
cra_locus_107144_iso_1_len_315_ver_3	Gene of unknown function	3.59437	10.4612	7.74458	14.2533	0	0	5.06977	4.08527	10.4469	13.1877	8.90605	10.6453	6.18285	3.08122	5.03891	5.00623	5.974	0	9.84827	0	4.60244	0	0
cra_locus_10714_iso_3_len_1658_ver_3	Fasciclin-like arabinogalactan protein 9	31.6856	5.69737	6.84098	4.67432	45.3427	38.8377	20.5789	19.1968	10.1387	6.56645	3.77874	4.07777	32.3482	58.8123	26.9934	32.8868	56.4377	42.6275	29.2163	29.1705	13.4	24.9414	9.16579
cra_locus_107157_iso_1_len_283_ver_3	Gene of unknown function	0	10.5772	7.35773	14.2321	0	0	0	8.11756	8.16875	10.7109	6.40682	6.17485	0	0	0	0	0	0	0	0	0	0	0
cra_locus_10715_iso_9_len_2951_ver_3	Pentatricopeptide repeat-containing protein	12.6281	24.3025	22.8118	21.9002	9.07019	8.98477	8.2174	33.4	45.5021	47.9496	16.1508	17.8394	8.3997	12.7076	10.5625	11.4538	12.5855	8.14454	12.8524	11.0336	9.42251	12.2808	8.37017
cra_locus_10716_iso_2_len_3366_ver_3	ATP binding protein	54.1047	5.34291	3.62991	8.48196	6.091	6.66978	32.536	9.06221	29.9944	25.2919	5.30069	10.2572	1.71689	5.08333	19.4457	10.1187	5.26635	38.7912	11.1025	10.0106	3.05703	2.45879	1.83917
cra_locus_10717_iso_1_len_325_ver_3	Gene of unknown function	0	2.26909	0	0	0	0	0	0	0	0	3.10742	0	0	0	2.33556	0	0	0	0	0	0	0	0
cra_locus_10718_iso_1_len_1020_ver_3	Conserved gene of unknown function	2.7298	21.9961	34.5737	16.0658	35.7924	23.7621	6.37922	13.4545	4.60615	3.99312	6.42566	20.4814	13.7038	35.7833	124.246	73.4433	47.3712	70.3281	44.5276	54.6136	14.5001	37.5072	5.73088
cra_locus_107192_iso_1_len_290_ver_3	Gene of unknown function	0	6.55042	5.8344	8.25129	0	0	0	5.00324	4.13383	5.2118	6.77717	11.3115	0	0	3.3186	0	0	0	0	0	0	0	0
cra_locus_107198_iso_1_len_305_ver_3	Gene of unknown function	0	2.43352	0	0	0	0	0	2.73919	0	0	0	0	0	1.99682	2.08994	0	0	0	3.4017	0	0	0	0
cra_locus_10719_iso_2_len_1359_ver_3	Import inner membrane translocase subunit TIM50	10.6582	21.256	15.4568	17.5225	18.1791	14.4885	18.1498	17.167	20.5926	19.0934	17.6618	18.2438	13.0295	10.0468	14.4906	14.8471	11.4699	11.1327	11.7291	11.6535	14.1613	11.2387	13.2377
cra_locus_1071_iso_4_len_2072_ver_3	Cytochrome P450	18.1529	103.673	127.383	98.8212	38.7178	75.8357	20.443	30.9073	12.3901	16.1227	52.6071	102.376	62.8084	72.5292	47.3975	13.3489	9.59021	12.7018	11.6863	17.6129	105.794	5.98573	108.084
cra_locus_10720_iso_2_len_1729_ver_3	Disease resistance protein	1.55949	0.826096	0	0	1.40662	3.00185	2.96814	1.37457	4.00326	4.03719	1.29021	0	3.41177	1.78784	3.04071	3.57946	3.4937	1.72482	2.50648	3.65587	1.48406	9.36218	4.95727
cra_locus_107212_iso_1_len_342_ver_3	Gene of unknown function	2.59288	5.46217	4.20168	6.38901	0	0	0	3.29371	2.91674	2.17297	0	0	0	2.98681	0	0	0	0	2.30737	0	0	0	0
cra_locus_10721_iso_3_len_2103_ver_3	Hec1 protein	14.2175	18.6357	24.8301	17.5782	16.654	15.4747	14.3178	25.3507	15.3264	13.1771	18.9677	24.822	8.66243	17.8375	19.7369	13.8357	20.595	21.0231	25.6638	23.3486	13.1693	24.4993	17.8875
cra_locus_10722_iso_1_len_1917_ver_3	Conserved gene of unknown function	1.03166	0	0	0	11.8915	13.0588	14.0388	0	0	0	0	0	1.3487	7.96047	3.97033	10.4274	8.57557	11.2545	9.63962	17.0078	1.85918	23.0383	3.68736
cra_locus_10723_iso_4_len_3081_ver_3	Hydrolase	35.0475	8.42266	6.48627	7.81235	12.8843	15.5321	15.8108	16.5291	22.4346	23.379	22.1627	8.46418	10.1045	8.48916	12.677	14.113	27.5111	18.1573	54.8044	34.1939	83.7422	17.0049	45.4407
cra_locus_10724_iso_3_len_1199_ver_3	Conserved gene of unknown function	9.01745	8.66311	7.69079	6.57383	11.3545	12.4544	14.5739	10.9261	14.258	11.4149	7.07536	9.46252	6.58954	9.6151	11.765	7.18951	7.78833	11.9137	8.95042	7.41459	7.40652	6.67485	7.04628
cra_locus_10725_iso_2_len_2129_ver_3	CG10263 CG10263-PA	29.0104	27.971	23.369	26.7367	25.3043	22.6904	27.2039	21.3386	22.4876	23.0835	24.3426	27.8755	17.5819	16.9703	22.7631	31.022	18.7128	25.6197	16.0261	21.8264	26.3782	23.8665	25.0378
cra_locus_10727_iso_2_len_413_ver_3	(S)-2-hydroxy-acid oxidase	4.15263	11.4411	10.6302	13.3133	9.76569	12.9616	11.0171	16.7277	20.4139	23.7385	8.19647	9.4871	9.47982	17.5492	28.074	20.1099	24.3456	19.0257	22.833	11.7974	19.6973	5.78955	7.86749
cra_locus_107282_iso_1_len_542_ver_3	Tellurite resistance protein teha	28.4221	7.61725	7.7581	10.7946	34.441	28.5231	10.1185	17.0134	99.3299	92.7431	7.99845	13.5775	13.2357	20.0788	19.4545	29.7696	36.4289	88.7993	33.2939	48.078	45.4352	40.2721	51.6914
cra_locus_10728_iso_1_len_2390_ver_3	Serine/threonine protein kinase	11.3205	8.66364	4.80797	5.76609	18.0619	18.6456	25.6705	10.858	22.4974	18.6724	3.20654	3.79042	18.3945	21.3837	13.8228	33.9854	13.0259	7.09184	14.3462	22.4847	10.5464	18.0041	12.8809
cra_locus_10729_iso_1_len_1530_ver_3	Pentatricopeptide repeat-containing protein	7.93007	10.2511	11.4824	10.1971	12.3908	12.7801	11.3214	10.5772	6.52455	7.33238	9.80463	8.35929	8.7649	12.9136	22.9427	12.4005	10.1361	12.5141	12.8467	12.5942	8.84255	10.0765	7.56736
cra_locus_1072_iso_2_len_1039_ver_3	DNA binding protein	0	0	0	0	6.37931	13.2098	18.6054	0	0	0	0	0	2.10094	3.06915	2.70507	7.56057	39.8746	8.66772	35.9673	32.0492	50.0671	47.568	118.538
cra_locus_10730_iso_1_len_1411_ver_3	Gene of unknown function	2.50557	3.53455	3.30559	2.89401	4.18153	5.42764	3.86095	2.88442	3.42307	2.72915	1.17752	1.60219	2.4055	2.94738	7.0334	4.10092	6.41698	6.45759	7.78645	8.33836	7.46093	8.58368	8.21896
cra_locus_107313_iso_1_len_302_ver_3	Gene of unknown function	3.76553	2.2366	3.29605	0	2.67642	0	0	0	0	0	4.14673	5.40715	0	3.83644	0	2.40379	0	4.98134	2.90999	0	0	0	0
cra_locus_10731_iso_3_len_2094_ver_3	Conserved gene of unknown function	32.8296	12.3301	14.2457	14.4144	6.79374	7.39884	7.47095	12.7541	21.8639	18.6989	28.7469	16.2627	9.84761	10.8228	14.558	13.896	9.66101	9.65183	7.79913	8.96632	10.0396	8.61693	10.9124
cra_locus_107320_iso_2_len_337_ver_3	Gene of unknown function	6.49959	3.17191	7.19139	4.74468	5.6072	6.98677	3.76612	4.23976	2.96409	4.21574	3.67551	3.29498	3.21508	9.28688	5.0469	3.87387	11.6229	8.55461	3.04827	0	0	3.20959	0
cra_locus_10732_iso_1_len_932_ver_3	Protein preY, mitochondrial	9.82633	6.82944	6.89872	6.47337	11.843	13.2091	13.0384	6.01281	9.19097	8.35368	6.42502	5.31284	10.4962	10.0032	18.2905	15.5916	19.1913	19.1072	18.715	9.46356	12.5119	9.63374	18.6652
cra_locus_107331_iso_1_len_403_ver_3	Mannan synthase	0	0	0	0	9.23539	12.9872	43.266	0	0	0	0	0	0	0	0	0	0	0	0	0	0	0	0
cra_locus_10734_iso_3_len_1020_ver_3	Short-chain dehydrogenase Tic32	0	0.677752	0	0	5.86478	5.08744	76.7262	1.3177	0.92123	0	0	0	0	1.866	2.98696	1.44479	11.0834	0.85766	9.91121	5.35684	2.6565	12.0701	5.45358
cra_locus_107353_iso_1_len_417_ver_3	Lipase-1	0	2.83265	0	30.1312	0	0	3.28856	0	10.2674	3.34652	0	0	0	0	0	2.30635	0	0	0	15.0169	3.39252	8.15302	4.01347
cra_locus_10735_iso_2_len_1901_ver_3	CBL-interacting serine/threonine-protein kinase	72.2552	5.18612	8.68912	5.71102	10.5739	21.9397	16.6063	7.08581	5.67484	10.3382	10.6962	7.39259	36.9151	45.8824	44.958	40.0904	73.1025	110.692	31.4808	18.744	38.1459	24.2914	80.5918
cra_locus_107367_iso_1_len_360_ver_3	Gene of unknown function	4.08646	3.13597	3.13673	6.5063	2.00676	2.22901	2.27787	2.07639	9.52807	8.03241	5.34393	3.90222	2.77799	3.65186	0	0	2.70381	0	2.61827	0	0	0	0
cra_locus_107368_iso_1_len_374_ver_3	Gene of unknown function	0	2.1238	4.01259	2.67526	1.92533	2.13856	0	0	0	0	0	0	0	0	4.49768	0	4.48071	2.70996	7.53607	0	3.17946	2.86537	4.51371
cra_locus_10736_iso_1_len_1571_ver_3	Conserved gene of unknown function	5.05258	12.9088	11.3566	12.3202	5.4707	5.66191	3.94929	13.0593	8.93456	13.6333	12.9853	13.9406	4.17419	6.83026	6.00644	4.64262	4.16826	2.75597	7.11903	2.68698	2.06294	3.39775	2.31677
cra_locus_10737_iso_1_len_1408_ver_3	Exopolygalacturonase clone GBGE184	31.1524	1.15123	1.40542	1.22705	0	0	0	0.548234	0	0	0.513079	0.936645	0	0	0	0	0	0	0	0	0	0	0
cra_locus_10738_iso_1_len_2392_ver_3	Kinase	4.80829	1.8863	1.43531	1.17177	5.50955	6.55686	9.9159	2.79219	1.47515	1.36065	1.52706	0.858955	6.49547	6.3569	5.06806	4.92308	8.67659	7.4815	9.29119	6.90407	5.70971	4.76915	4.34168
cra_locus_10739_iso_2_len_1016_ver_3	CAAX prenyl protease 1 homolog	0	0	0	0	0	0.872108	0	0	0	0	0	0	0.788298	0	0	0	0	0	0	0	0	0	0
cra_locus_1073_iso_2_len_864_ver_3	40S ribosomal protein S7	117.994	212.062	178.804	171.145	255.195	228.483	331.319	195.156	133.189	136.843	171.419	172.918	139.007	173.034	190.042	175.401	183.669	169.072	224.36	237.248	175.506	241.87	154.022
cra_locus_10740_iso_5_len_2322_ver_3	Mate efflux family protein	31.217	33.3922	12.7084	14.2893	29.5185	109.748	136.876	64.7422	20.9929	49.8584	25.4256	7.524	51.7918	54.2086	82.0104	55.2087	145.973	147.452	91.1499	109.715	574.457	128.214	582.607
cra_locus_107410_iso_2_len_564_ver_3	Gene of unknown function	0	18.0325	27.2987	16.2453	6.95277	2.64322	0	21.9675	9.46292	7.74331	19.3085	25.1774	0	0	1.17549	0	5.93093	0	1.34992	0	0	5.17374	0
cra_locus_10741_iso_3_len_2298_ver_3	Chitin-inducible gibberellin-responsive protein	7.63046	17.2225	12.4768	7.05072	11.7683	9.94468	5.08666	20.9912	3.43829	6.67632	9.82256	9.92125	8.97786	9.32175	15.7354	35.7578	7.31489	10.0764	7.63903	6.16294	2.80393	6.23019	4.23895
cra_locus_10742_iso_1_len_616_ver_3	ATP binding protein	0	1.14421	0	0	10.2974	9.63627	17.8836	0	0	0	0	0	0	9.39091	3.11408	6.19951	6.23715	1.88232	5.78257	7.94077	2.05555	11.4517	4.36941
cra_locus_10743_iso_3_len_1627_ver_3	Gene of unknown function	4.97709	12.7621	22.3505	26.0872	4.07355	4.54009	2.10507	9.80609	7.53079	8.12546	8.81099	23.7866	5.26726	4.58593	26.8788	14.1118	8.19712	18.9349	9.26485	8.99383	5.07958	6.92853	4.24188
cra_locus_10744_iso_2_len_1433_ver_3	MdFBX7 protein	4.5858	0	0	0	0	0	0	0	0	0	0	0	0	0	0	0	0	0	0	0	0	0	0
cra_locus_107454_iso_1_len_619_ver_3	Gene of unknown function	3.57641	3.72565	4.22342	5.34486	2.47682	3.75154	2.06434	3.61117	1.40669	3.77273	4.79686	6.56763	2.03804	1.20253	3.19493	3.33678	2.48218	5.18608	4.40668	0	0	2.01062	0
cra_locus_107458_iso_1_len_277_ver_3	Gene of unknown function	0	0	3.34922	0	2.67838	0	0	0	0	5.23568	0	0	0	0	0	0	0	0	0	0	0	0	0
cra_locus_10745_iso_3_len_2197_ver_3	Amino acid transporter	43.5233	20.5315	10.8551	15.5034	27.023	25.4102	63.7766	21.018	16.6525	14.7162	10.8023	12.0857	43.6201	52.4628	46.1374	46.4768	26.9825	27.7564	20.8201	31.2947	58.1851	27.4041	46.3079
cra_locus_10746_iso_5_len_1678_ver_3	WW domain-containing protein	17.9802	24.9569	27.3678	26.8662	15.6694	17.4868	15.2645	37.2193	37.2443	37.0835	27.2888	28.3101	14.3694	12.936	13.6426	14.2903	13.7163	17.3699	12.92	11.6209	14.7009	12.5892	16.6094
cra_locus_10747_iso_1_len_1244_ver_3	Class III peroxidase	1.06874	0	0	0	0	0	0	0	0	0	0	0	0	0	9.12751	2.65145	1.33926	2.72821	1.96155	1.38537	0	1.05771	0
cra_locus_10748_iso_4_len_376_ver_3	Histone H2A	127.721	95.1439	92.1068	92.5038	272.325	219.148	360.512	80.1727	303.391	106.331	67.3474	74.6769	127.541	336.236	190.26	154.144	170.132	146.751	167.066	301.281	136.952	355.183	159.893
cra_locus_107499_iso_1_len_598_ver_3	Gene of unknown function	1.99683	7.08245	5.35247	5.81247	4.3193	5.18667	3.77141	3.01971	1.4586	2.71665	7.70953	7.1343	1.98894	3.16624	3.61515	3.66963	5.43355	2.68874	4.06162	2.73066	0	1.73735	1.93185
cra_locus_10749_iso_2_len_1584_ver_3	Mitochondrial transcription termination factor family protein	2.19202	3.65178	2.62625	3.46236	4.4638	3.83531	7.68336	3.40328	5.23052	3.77745	2.13853	3.55985	5.8223	5.55104	3.21554	4.87236	2.98234	1.69442	2.83309	4.08004	2.04569	3.27391	2.15007
cra_locus_1074_iso_5_len_1346_ver_3	Ubiquitin-protein ligase	52.9133	56.0521	57.497	52.0935	37.2215	36.9275	28.3165	59.544	54.1323	57.8872	52.7026	52.3995	26.6923	36.6259	55.3423	46.7477	32.9271	48.9184	33.9443	34.8029	37.8965	34.8283	31.299
cra_locus_10750_iso_1_len_4547_ver_3	DNA binding protein	34.5489	18.2583	16.2089	15.6109	31.3888	32.579	32.6705	20.2474	11.1872	17.3258	17.0072	17.3982	23.1859	27.4467	26.0158	29.4987	25.2472	33.4107	21.9475	21.0926	19.2531	23.8277	21.4913
cra_locus_10751_iso_1_len_1545_ver_3	XIE; motor/ protein binding	2.78375	9.56564	8.54739	8.6249	0.569597	1.41948	1.58764	9.22573	11.8797	11.2159	6.39396	7.72872	0.653196	0.85952	0.637218	1.65278	0.644012	1.73801	2.09611	2.1352	1.37476	1.17374	0.785502
cra_locus_107522_iso_1_len_287_ver_3	Gene of unknown function	5.66212	0	4.29254	0	6.95132	5.00448	3.82159	0	0	0	4.9363	0	6.30555	14.5445	10.5216	3.006	13.8754	24.0487	15.116	0	4.67677	0	0
cra_locus_107528_iso_1_len_372_ver_3	Gene of unknown function	1.89288	2.49221	0	0	0	0	1.86	0	0	2.34345	0	0	4.33052	4.64291	4.35672	4.34822	0	0	0	0	0	0	0
cra_locus_10752_iso_1_len_1588_ver_3	Conserved gene of unknown function	3.19284	6.5015	5.06142	5.32822	5.7519	5.00861	6.10116	6.216	6.92064	4.52131	3.08611	3.314	6.62402	5.64122	7.58081	6.96452	8.19343	6.26961	8.8944	10.1324	2.74405	8.94073	3.70167
cra_locus_107537_iso_1_len_426_ver_3	Gene of unknown function	0	22.455	18.3068	22.6673	0	0	2.19137	15.7539	18.1877	30.6818	21.2972	35.7883	0	0	0	0	0	0	0	0	0	0	0
cra_locus_107547_iso_1_len_457_ver_3	S-type anion channel SLAH4	0	2.9959	2.911	2.69558	0	1.86749	0	7.38673	5.04172	6.93431	0	0	0	0	0	0	26.0429	176.542	20.755	22.689	12.0456	8.5459	5.77861
cra_locus_107549_iso_1_len_291_ver_3	Gene of unknown function	2.06507	3.02966	0	4.1099	0	0	0	0	0	0	0	0	0	0	0	2.96011	3.41589	0	0	0	0	0	0
cra_locus_10754_iso_4_len_1804_ver_3	Structural constituent of ribosome	33.8345	30.7876	33.6532	22.8792	49.8833	45.0649	32.6097	34.6935	25.1555	22.9906	33.4435	36.0722	30.325	53.6554	39.7102	29.9128	39.1904	43.7181	35.561	34.4304	27.7473	37.5372	27.2483
cra_locus_10756_iso_4_len_1889_ver_3	RNA polymerase III subunit RPC82 family protein	8.71199	20.2708	17.2854	16.9126	15.7844	15.3377	15.6687	20.9509	24.407	24.5491	11.5068	13.7644	13.6898	21.4121	15.1135	13.1342	17.9561	19.9005	17.6086	16.2893	11.4114	15.8381	12.0904
cra_locus_107573_iso_1_len_289_ver_3	Gene of unknown function	0	0	0	0	0	0	0	0	0	0	0	0	0	0	13.7707	0	35.3604	94.1474	16.6663	0	0	0	0
cra_locus_10757_iso_3_len_1957_ver_3	DnaJ	20.8225	45.6994	48.0715	44.9595	28.9743	26.6918	24.938	52.0812	36.4608	37.6822	47.5238	49.623	29.973	32.6428	26.1539	24.0179	23.1674	32.9308	24.7228	22.6319	27.0246	24.7651	22.7104
cra_locus_10758_iso_6_len_1383_ver_3	Amino acid transporter	5.63424	31.2061	52.603	77.0274	7.75108	6.22101	13.8784	13.2483	31.1996	27.7189	121.807	141.66	13.2687	5.53575	1.25954	0.837145	0	0.878817	0	1.0519	0.972155	1.09515	6.15639
cra_locus_10759_iso_7_len_2038_ver_3	Conserved gene of unknown function	92.4547	25.1653	20.9477	22.9325	64.4069	64.7888	68.3045	41.1893	45.112	48.6276	21.6945	20.0684	49.1496	56.1662	72.1816	67.5268	67.9554	64.0946	68.6618	72.1188	67.3765	77.0078	68.4847
cra_locus_1075_iso_17_len_1923_ver_3	Conserved gene of unknown function	19.1964	47.9863	56.097	50.0303	27.2147	25.2394	19.1693	44.942	37.0492	36.6609	56.5579	60.3047	17.8509	22.7025	22.0523	20.4895	30.8858	38.099	27.2257	25.4307	25.0772	26.671	26.576
cra_locus_10760_iso_7_len_2285_ver_3	15.8 kDa oleosin	24.8939	48.8799	47.9243	54.992	23.4662	24.9641	81.7785	48.8351	79.2421	72.1086	34.185	48.7062	19.909	20.4099	29.4887	31.8121	24.235	30.1021	26.8266	25.5973	25.5752	22.6982	21.4387
cra_locus_107616_iso_1_len_283_ver_3	Gene of unknown function	4.47322	0	0	0	3.13813	4.84123	3.19675	0	0	0	0	0	0	0	2.95697	2.81847	0	0	2.84333	0	0	0	0
cra_locus_10761_iso_6_len_1392_ver_3	Calcineurin-like phosphoesterase family protein	0.575535	0.425525	0	0.564298	0	0	0	0	0	0.725821	0.674833	0	0	0	0.458771	0	0	0	0	0	0	0	0
cra_locus_107623_iso_1_len_604_ver_3	Gag-pol polyprotein	1.0346	80.2184	78.5388	66.6077	0.865163	0.74748	0	85.6946	55.1307	76.7674	78.1278	116.237	1.04458	0	0	0.725528	0	0	8.34487	5.40273	6.7905	0	1.27294
cra_locus_107628_iso_1_len_584_ver_3	ATP binding protein	1.85223	2.53038	1.87073	0	2.7527	3.43422	2.40353	3.59123	2.99079	3.45362	3.31458	0	4.58801	8.46145	4.01611	2.79477	6.01039	2.29714	9.62942	4.43261	2.37171	1.78118	0
cra_locus_10762_iso_1_len_2539_ver_3	Pentatricopeptide repeat-containing protein	3.70757	3.81924	3.41949	3.64651	4.6576	4.65414	3.99749	4.02514	2.90977	3.79361	2.31147	2.49946	4.81878	6.43751	7.75514	7.60575	4.57043	3.52167	4.34475	3.97206	2.22879	3.26892	1.53278
cra_locus_10763_iso_1_len_881_ver_3	Non-specific lipid-transfer protein type 2	525.298	0	0	0	488.745	365.654	153.096	0	0	0	0	0	169.607	423.264	76.8316	860.694	76.3946	27.8326	23.9888	39.2083	6.69479	21.5811	17.2022
cra_locus_10764_iso_3_len_2302_ver_3	Gamma glutamyl transpeptidases	11.7826	12.5718	13.7338	9.64384	15.3713	15.0936	5.17978	15.4813	24.6829	28.9433	20.949	13.5162	6.09918	4.22318	23.1744	11.6533	27.0962	25.315	14.1709	15.5511	16.5044	16.0482	19.8275
cra_locus_107659_iso_1_len_398_ver_3	Meiotic checkpoint regulator cut4	0	4.96417	3.93919	5.21096	2.52014	3.33244	2.672	4.09764	5.39802	6.36741	2.30093	3.00031	0	2.67596	3.88993	3.39515	2.20488	2.99437	4.893	0	0	0	0
cra_locus_10765_iso_5_len_1113_ver_3	Gene of unknown function	35.3877	10.477	10.9189	9.01112	29.2902	28.9268	21.1875	12.1733	12.3267	12.6057	11.2919	8.76636	30.2763	27.2827	16.5346	18.8769	15.4614	25.0121	10.993	12.4223	14.1668	14.8648	22.5624
cra_locus_107660_iso_1_len_407_ver_3	Gene of unknown function	0	0	0	0	12.4764	4.87965	1.53434	0	0	0	0	0	11.4144	12.1865	11.6919	1.42042	5.81144	2.92308	4.28191	0	0	1.56913	0
cra_locus_10766_iso_5_len_2396_ver_3	Conserved gene of unknown function	10.6747	16.6127	22.3121	26.9052	13.7787	13.0396	11.2223	16.6377	17.1809	16.1434	20.1769	22.6459	9.74169	10.7449	15.8978	12.6019	14.0928	13.3937	15.7439	11.3232	10.4269	12.4039	10.8746
cra_locus_10767_iso_1_len_1098_ver_3	DnaJ	15.2343	52.7771	76.2748	79.6479	56.1091	57.8602	3.68931	30.2818	64.2062	72.8205	143.228	100.631	145.434	74.9661	112.902	29.187	30.9001	55.4966	42.0893	27.979	17.8544	15.1658	17.0521
cra_locus_10768_iso_1_len_1265_ver_3	Pentatricopeptide repeat-containing protein, chloroplastic	0.481514	0.741011	0	0	1.39726	1.14411	1.07925	1.22333	0	0.750375	0.629684	0	0.915622	1.01106	0.506102	1.39973	0	1.16901	0	1.15232	0.976219	0.95976	0
cra_locus_107691_iso_1_len_279_ver_3	Gene of unknown function	5.19405	4.39627	4.98363	0	9.29933	12.0508	6.4958	6.32304	6.97154	9.64562	9.05646	5.53557	5.37562	5.7427	11.3275	5.72713	27.337	12.5791	18.0548	9.32247	14.4793	13.0489	10.9922
cra_locus_10769_iso_1_len_1889_ver_3	Phosphoglucomutase	20.7692	12.376	8.70796	7.89814	18.5701	18.8087	18.8962	13.524	13.6539	12.1002	7.3036	6.10103	13.3478	16.7739	22.8382	17.8652	22.1335	19.5121	21.8603	22.2759	10.9691	23.5446	13.494
cra_locus_1076_iso_6_len_2752_ver_3	Lipid binding protein	26.6649	30.1821	38.7901	27.2856	22.125	28.6532	13.0139	27.5621	21.3353	19.4598	40.5346	33.5766	13.0917	15.6887	34.5284	25.3923	26.8014	35.0527	28.5912	18.0215	18.8123	16.1915	19.6457
cra_locus_107703_iso_2_len_376_ver_3	Gene of unknown function	17.1513	11.2617	54.4561	18.3973	78.1006	64.1414	24.737	26.3427	0	4.98924	52.6064	61.6836	16.1032	63.7659	51.6692	23.0378	55.3343	64.6641	49.1184	22.0151	23.7085	28.2037	41.7091
cra_locus_10770_iso_2_len_1655_ver_3	Fructose 1,6, bisphosphate aldolase	9.3502	0	0	0	106.254	21.4777	1.35543	0	0	0	0	0	146.031	75.8463	0.803615	1.65104	0	0	0	0	0	0	0
cra_locus_107713_iso_1_len_292_ver_3	Gene of unknown function	6.58308	0	0	0	11.3653	4.208	2.20525	0	0	0	0	0	6.45461	22.8621	0	2.72202	0	0	0	0	0	0	0
cra_locus_10771_iso_6_len_3179_ver_3	Glutamate receptor	18.4128	2.18062	1.28544	1.58711	8.29767	5.06505	2.771	5.26917	3.25388	4.44591	1.67335	1.90377	21.096	14.5565	4.90735	6.64752	6.71545	5.99006	5.54833	5.98064	1.58439	11.6586	2.18099
cra_locus_10772_iso_3_len_1713_ver_3	Thioredoxin o	26.6668	21.7551	18.3319	18.1323	26.1514	22.5269	30.3423	23.0592	22.5721	23.1682	17.5203	16.0523	20.9591	22.7221	18.0133	25.2234	15.9918	18.1698	14.71	17.6842	19.9972	16.5542	19.9631
cra_locus_10773_iso_1_len_1588_ver_3	Heat-shock protein	13.7084	15.7446	16.0278	17.0207	5.62408	6.9805	4.98509	13.2696	24.1158	23.5584	12.889	16.3925	14.7452	12.5012	15.5261	9.14572	4.95781	8.6139	5.79062	5.14925	8.02106	4.31184	6.99204
cra_locus_10774_iso_1_len_517_ver_3	Gene of unknown function	0	0	0	0	0	0	1.18849	0	0	0	0	0	0	0	3.0488	1.34474	32.8442	5.05088	70.2968	42.7174	55.7449	42.1351	54.06
cra_locus_10775_iso_4_len_2318_ver_3	Lipase class 3 protein	16.4276	20.3798	25.1589	21.2361	12.8843	13.7794	11.9088	18.5558	15.9535	24.6891	34.8359	31.7205	11.8041	10.638	14.8785	13.1877	12.4049	12.3277	10.0333	10.5778	10.1593	11.0991	13.0059
cra_locus_107761_iso_1_len_359_ver_3	Gene of unknown function	2.45931	0	0	0	0	2.23577	0	0	3.52098	1.87366	0	0	2.14339	2.83058	4.00819	3.07327	0	0	0	0	0	0	0
cra_locus_10776_iso_4_len_3779_ver_3	Protein kinase	21.4543	25.2541	29.8833	27.0532	9.72444	10.444	6.88245	19.1341	21.9769	32.5808	36.2636	30.7778	12.694	11.343	24.0009	20.0927	14.9052	25.2036	12.1523	14.5707	18.4282	15.026	19.1997
cra_locus_107770_iso_1_len_283_ver_3	Gene of unknown function	10.6505	0	0	0	5.49173	10.8928	17.3538	0	0	0	0	0	5.84791	4.3465	6.1414	4.69745	17.6174	10.0387	12.2263	0	0	0	4.68827
cra_locus_107774_iso_1_len_674_ver_3	Gene of unknown function	14.7635	7.38391	9.76552	5.96231	22.5532	19.446	15.8259	9.80316	7.3344	7.2855	13.9313	8.72532	13.8174	13.1903	5.92923	11.9315	4.28876	5.00741	2.91122	2.60965	4.42167	3.06528	4.6866
cra_locus_10777_iso_1_len_1641_ver_3	Tabersonine 16-hydroxylase	5.07502	0.795437	0	0.715699	2.55476	3.26103	1.11535	0	0	0	0	0.629563	0	0.545708	32.9886	0	44.1626	5.21986	33.6014	16.8676	13.7455	13.5527	16.9338
cra_locus_107785_iso_1_len_321_ver_3	Tyrosyl-DNA phosphodiesterase	15.1938	5.855	3.55568	2.89744	5.23201	8.63297	11.9174	4.70744	6.25301	8.46999	5.08844	4.4234	7.26697	8.29622	5.13091	8.98951	5.57262	5.23936	7.66726	10.1987	0	5.41673	3.45075
cra_locus_10778_iso_1_len_1889_ver_3	GNS1/SUR4 membrane family protein	33.5391	0.820689	0.409349	0	8.03513	15.8006	7.51482	1.66279	0.62469	1.52915	0.646673	0	6.61685	5.83439	51.2637	22.0669	32.4566	32.6725	30.9073	15.1755	32.0818	10.3107	29.8937
cra_locus_107790_iso_1_len_316_ver_3	Gene of unknown function	0	0	0	0	6.94325	6.42686	7.6792	0	0	0	0	0	2.46452	5.37302	0	6.65172	5.38622	0	7.80084	0	0	4.82221	0
cra_locus_107792_iso_1_len_295_ver_3	Conserved gene of unknown function	8.94965	35.8092	0	83.2751	0	0	27.0368	0	31.2009	23.942	0	0	0	0	0	63.6946	0	0	0	18.497	9.4846	23.4131	17.5627
cra_locus_107797_iso_1_len_898_ver_3	Gene of unknown function	23.8459	7.02638	7.08898	8.67382	8.33164	6.43844	1.80202	3.7172	10.7921	19.9937	11.8058	9.23657	13.5115	10.2716	1.2455	17.3	2.15338	1.27149	3.57363	0	0	0	0
cra_locus_10779_iso_7_len_1292_ver_3	Drm3	124.231	190.188	323.89	298.46	505.305	154.415	16.256	163.414	89.5	69.5659	222.961	298.693	1000.66	765.897	484.434	513.348	151.061	211.24	176.692	122.815	8.07705	154.975	24.1515
cra_locus_1077_iso_2_len_860_ver_3	Peroxisomal biogenesis factor	30.145	6.31901	9.99526	8.1449	10.2313	10.8022	33.431	11.7442	10.3868	16.3692	18.0503	12.2125	7.83072	9.43391	15.1536	10.1942	12.7278	15.9556	18.5983	10.5951	13.4639	11.4201	10.9128
cra_locus_107803_iso_1_len_299_ver_3	Gene of unknown function	2.80543	4.29676	3.58904	0	2.46014	2.7326	0	2.54551	0	0	5.24101	3.41702	2.88167	0	0	2.4305	3.61601	3.14793	2.67484	0	0	0	0
cra_locus_107805_iso_1_len_264_ver_3	Gene of unknown function	0	26.7621	25.6251	22.5832	0	2.61632	0	34.803	27.9003	19.9964	26.7961	31.4075	0	3.29389	0	0	10.0402	0	0	0	0	0	5.06733
cra_locus_107806_iso_1_len_593_ver_3	Gene of unknown function	4.60466	8.44437	7.48625	8.04595	2.23768	1.41718	0	0	3.97314	1.64444	8.15423	8.99694	0	0	7.70025	0	7.21278	3.16468	32.3969	8.95332	10.1134	3.85606	2.76104
cra_locus_10780_iso_4_len_1565_ver_3	Novel plant snare	34.2734	10.3356	7.88607	8.16208	29.7956	21.7354	39.1186	10.3809	13.5082	12.9217	7.37017	7.26784	25.0969	28.6298	18.6448	35.2275	27.9676	17.0431	30.6562	30.0937	8.42682	31.0854	10.3768
cra_locus_107810_iso_2_len_732_ver_3	Cucumber peeling cupredoxin	52.0267	10.5963	13.9813	6.45507	97.1318	233.515	94.8761	10.8519	19.8337	13.2809	16.7071	8.00545	41.2518	114.973	125.933	29.1924	96.2898	451.206	173.206	89.5116	208.929	59.7632	432.469
cra_locus_107817_iso_1_len_342_ver_3	Amino acid binding protein	49.8674	0	2.54286	3.80854	0	3.33936	0	0	3.44706	10.1728	166.368	6.92648	0	0	0	0	0	0	0	0	0	0	0
cra_locus_10781_iso_1_len_2202_ver_3	Pentatricopeptide repeat-containing protein	9.78516	22.1278	29.1134	33.7134	13.6027	13.4398	12.7446	15.4028	19.5546	19.3486	19.9268	27.1509	12.5644	11.8062	16.3277	14.7154	12.3931	12.1643	11.998	12.3937	9.9949	12.101	11.2974
cra_locus_107826_iso_1_len_399_ver_3	Gene of unknown function	4.67933	2.80543	4.11561	4.36538	4.12905	4.48664	2.66478	2.04328	0	0	3.05962	4.4883	2.48517	2.22386	4.34479	3.86968	3.07849	5.28342	2.53748	0	0	2.93894	0
cra_locus_107829_iso_1_len_519_ver_3	Gene of unknown function	3.20212	9.47042	13.1371	11.1447	1.49115	2.50953	1.77546	4.76893	0	2.6499	13.5731	18.8285	4.90792	3.01253	3.38657	3.04376	5.31332	3.12223	5.74818	3.69939	0	0	4.29967
cra_locus_10782_iso_4_len_3084_ver_3	FAR1; Zinc finger, SWIM-type	13.1056	8.73417	7.49947	9.11385	10.2625	9.64015	11.182	7.94148	7.79686	10.322	8.6155	8.84846	10.7892	11.497	13.7044	14.8607	12.4637	14.3836	11.8437	12.1214	13.2851	11.1313	10.6744
cra_locus_107833_iso_2_len_296_ver_3	Amino acid binding protein	40.525	0	3.75868	5.90503	0	3.45413	0	0	6.52766	11.4622	143.357	5.70102	0	0	0	0	0	0	0	0	0	0	0
cra_locus_107849_iso_1_len_648_ver_3	Gene of unknown function	3.58367	10.8506	10.2875	10.4374	3.64848	4.07242	3.56047	7.10603	7.64246	15.0831	10.173	12.2218	3.31377	5.02361	4.51992	4.24061	3.94314	2.60887	7.11706	0	1.94928	2.07612	2.21975
cra_locus_10784_iso_2_len_1081_ver_3	EH-domain-containing protein	34.9212	21.4172	18.028	21.4949	15.9114	17.9425	18.5241	21.1021	30.8468	30.8567	20.7822	22.9772	13.3799	8.11451	14.4974	22.1164	19.1026	18.2592	16.3389	11.8156	14.1806	13.3436	18.895
cra_locus_10785_iso_2_len_2236_ver_3	Osmotic avoidance abnormal protein	2.25538	1.35564	0.689976	0.836399	8.6378	6.63031	14.7952	3.23869	7.85947	4.73467	0.51294	0.710653	0.993514	5.50478	1.69758	3.5681	5.45596	4.08218	5.23575	6.86407	0.646121	6.62917	1.53569
cra_locus_107862_iso_1_len_298_ver_3	Gene of unknown function	7.44191	3.63178	4.88894	4.5748	2.71621	3.88558	2.15607	5.10994	3.39383	2.75826	7.10166	11.6611	0	0	0	2.66131	3.93191	7.26716	5.90652	0	0	0	10.5563
cra_locus_10786_iso_1_len_2567_ver_3	Intron maturase, type II family protein	7.3973	7.26552	6.87262	8.12171	9.5265	9.10868	6.99269	5.03685	4.5781	5.23784	4.68345	7.19755	9.69845	12.7113	11.9178	12.9047	11.284	10.1471	12.7482	12.3459	8.64393	11.1397	7.14623
cra_locus_107871_iso_1_len_383_ver_3	Gene of unknown function	5.1965	3.62216	10.9496	2.82452	16.8874	14.4156	4.75126	13.2021	4.68895	2.61995	10.3932	10.1642	3.39673	11.9392	10.3862	6.74097	12.6407	6.00241	7.54849	0	0	0	0
cra_locus_107875_iso_1_len_788_ver_3	Gene of unknown function	8.41154	12.8715	16.0504	11.2483	5.07586	6.31847	1.37545	6.97247	3.28041	6.10977	31.6206	23.0953	4.37997	3.80377	1.12674	1.88641	8.03955	4.47927	9.61039	0	8.52674	0	4.10337
cra_locus_10787_iso_6_len_1969_ver_3	Dehydroquinate dehydratase	23.2873	8.74973	6.88604	4.95579	15.3391	20.6636	17.6984	11.9744	14.1176	18.5811	9.84715	4.18497	8.02113	10.5431	14.0789	10.0864	27.2599	19.1456	18.4274	19.4886	47.9476	17.9876	41.929
cra_locus_107882_iso_1_len_504_ver_3	Gene of unknown function	6.94818	8.09839	11.8033	11.1727	2.93663	4.14205	2.80833	3.03853	4.54286	5.33698	6.85193	13.4019	2.38255	4.26003	6.38677	4.77261	9.93451	9.30462	11.2512	0	2.77115	4.37045	0
cra_locus_107884_iso_1_len_340_ver_3	Gene of unknown function	29.9229	39.0701	54.7505	45.0107	17.7272	19.3743	8.57851	55.4691	22.4165	31.2137	48.2308	61.7041	11.1442	16.9769	12.9563	14.0032	21.4519	19.9504	19.2743	0	5.996	6.35726	6.47986
cra_locus_107887_iso_1_len_320_ver_3	Gene of unknown function	3.53261	5.45547	8.56295	7.92926	2.96738	5.07081	2.39168	3.54271	5.41888	3.61211	4.86279	7.60903	5.10436	3.78419	5.14885	3.07514	3.91424	0	4.71544	0	3.76947	0	4.09217
cra_locus_107889_iso_1_len_420_ver_3	Putative protein	28.8105	11.556	17.7026	17.7039	21.4051	21.8573	11.8666	15.8199	11.0376	11.702	17.5527	19.1126	22.2507	38.1321	61.186	18.767	41.8246	50.8661	30.6615	17.882	22.1627	16.4338	14.9936
cra_locus_10788_iso_1_len_1530_ver_3	RNA polymerase sigma subunit SigD	4.14526	0	0	0	15.8426	10.9778	4.59813	0.595252	0.774099	0.988635	0.565652	0	22.3835	24.8143	0.416451	3.49758	0	0	0.48115	0	0	0	0
cra_locus_107894_iso_1_len_301_ver_3	Ankyrin repeat family protein	3.38154	2.91827	0	0	9.03559	13.3365	4.4778	0	0	0	0	0	0	24.5236	4.2425	6.14123	9.57179	29.9979	13.2759	5.23627	4.83933	7.63221	4.37802
cra_locus_107895_iso_1_len_459_ver_3	Gene of unknown function	2.64232	0	0	0	3.39843	3.43164	2.15807	0	0	0	0	0	2.96087	2.67387	5.06405	5.68829	5.48708	2.17427	8.39775	3.01113	2.80606	2.52886	2.3433
cra_locus_107898_iso_3_len_307_ver_3	Gene of unknown function	5.25477	0	0	0	104.653	92.0042	16.6901	0	0	0	0	0	57.7558	123.293	0	5.36489	0	0	0	0	0	0	0
cra_locus_10789_iso_2_len_2848_ver_3	Transcription factor	80.6868	114.278	161.024	144.415	98.5164	81.7891	55.7556	159.302	99.1871	128.158	143.641	177.483	52.6913	53.7293	135.374	126.595	111.78	140.169	133.066	169.071	188.682	196.308	169.068
cra_locus_1078_iso_4_len_1338_ver_3	Tau class glutathione transferase GSTU45	50.6741	160.321	130.767	88.019	63.0239	117.801	48.9152	325.792	198.071	812.965	310.959	199.391	0	0	117.922	2.05087	84.2193	91.3573	148.138	83.6814	387.984	33.8328	259.83
cra_locus_107904_iso_1_len_1406_ver_3	ATP binding protein	31.3548	49.6633	40.3641	35.301	20.7906	21.834	23.1656	62.7891	32.0044	40.098	57.1887	52.2603	21.163	24.2172	24.2319	26.4279	24.6976	22.8379	29.3183	36.8596	39.4316	34.6747	41.9758
cra_locus_107907_iso_1_len_304_ver_3	Arabinogalactan peptide 16	84.0099	0	0	0	0	0	0	0	3.01798	4.72163	0	0	0	0	0	0	0	5.56325	0	0	0	0	0
cra_locus_107909_iso_1_len_1114_ver_3	Microtubule-associated protein	9.07563	6.80937	4.97598	6.02551	15.5499	20.2868	18.1746	11.3386	20.0411	15.8424	5.21686	3.14618	12.1906	15.0317	17.3583	16.3852	16.422	8.85192	17.506	14.2009	16.5801	15.58	20.6842
cra_locus_10790_iso_1_len_1756_ver_3	AP2/ERF domain-containing transcription factor	4.07273	3.4295	3.16627	2.58309	4.61543	4.37897	2.88816	2.22861	2.64314	2.9	2.41718	2.61767	2.90791	2.19975	6.51231	6.28702	5.18218	4.33091	5.35278	5.84791	3.93797	4.12136	2.75813
cra_locus_107912_iso_1_len_955_ver_3	Conserved gene of unknown function	8.82269	10.4843	8.96982	10.6317	6.45587	5.57735	4.88538	8.60964	8.69381	11.5516	15.2816	10.2621	5.27051	5.99308	5.71909	7.21561	6.06248	5.32361	8.34515	4.61425	4.85675	6.40531	5.04502
cra_locus_107913_iso_1_len_1263_ver_3	Conserved gene of unknown function	7.58518	10.8363	9.19904	8.60138	9.04311	7.87229	7.66103	12.7543	4.84247	6.01273	7.68313	8.29887	10.948	10.7435	12.3045	8.65374	5.99982	6.33668	7.02308	7.03004	6.13348	6.24855	4.52812
cra_locus_107919_iso_1_len_368_ver_3	Midasin	3.51122	25.5764	17.9679	19.7389	7.05385	9.61248	7.01453	14.3945	12.9755	18.9688	17.5319	22.5886	6.25945	9.88309	12.8876	10.3829	9.36002	9.27665	10.652	4.58332	4.85361	4.08252	5.67444
cra_locus_107920_iso_1_len_695_ver_3	Conserved gene of unknown function	5.9304	8.25125	5.40434	7.39112	7.38042	5.26211	3.9188	7.84291	3.48926	5.57035	5.2056	5.81817	10.7266	9.90588	9.85371	7.34523	4.8865	4.33904	5.74729	4.6659	2.14113	3.41392	3.02588
cra_locus_10792_iso_3_len_3659_ver_3	Heat shock protein 70	30.1377	4.45749	5.56788	4.68263	13.7056	14.4647	17.0959	5.43392	4.84706	9.24908	9.49229	9.75969	19.8361	28.8707	8.90574	6.82036	21.0012	19.6212	24.2924	14.874	19.5511	15.6317	18.5727
cra_locus_107930_iso_3_len_489_ver_3	Gene of unknown function	3.52857	321.889	574.653	475.862	11.552	4.41078	3.40424	284.925	105.908	111.161	337.31	763.548	0	0	23.5263	2.07505	20.5169	46.3772	12.4031	7.88131	7.39225	13.7538	6.57142
cra_locus_107934_iso_1_len_404_ver_3	Gene of unknown function	24.816	3.74497	4.98363	0	10.2735	11.8049	2.31993	15.3952	6.86088	8.90365	0	3.69038	14.9008	30.8596	9.18444	4.29535	8.02754	8.15944	6.7406	0	0	0	0
cra_locus_107936_iso_1_len_320_ver_3	Gene of unknown function	12.0852	8.60285	8.80081	5.02186	32.8695	34.4393	12.5563	21.4925	7.98572	7.22423	13.3727	6.34086	15.5561	114.472	33.4676	18.4508	122.739	81.7813	66.2643	0	0	8.15302	6.29565
cra_locus_10793_iso_1_len_1534_ver_3	TRANSPARENT TESTA 12 protein	0.5752	1.01427	0.689872	0.919899	5.6052	4.61638	1.27172	0.867671	0	1.60226	0.893235	0	0.516977	0.432912	5.21064	0	25.4622	10.2219	25.8171	31.4018	4.88328	22.7269	3.71276
cra_locus_107941_iso_1_len_395_ver_3	Gene of unknown function	2.21741	4.00389	2.64765	4.62323	1.99634	0	4.43702	0	0	3.71661	0	0	0	2.3984	2.35335	2.77098	0	0	2.17057	0	0	0	0
cra_locus_107945_iso_1_len_579_ver_3	Kinesin-like centromere protein	2.45931	0	1.88774	1.53828	5.07236	4.35975	8.54155	1.87442	4.22517	4.72163	0	2.34842	3.9867	4.66671	1.45491	4.01333	2.6627	0	2.88883	0	0	1.97711	0
cra_locus_10794_iso_1_len_1039_ver_3	Chloroplast protein CP12	35.8377	45.0388	48.3149	39.5992	92.5329	109.818	48.5232	62.9446	24.9805	26.324	43.9233	55.5384	46.9211	73.9827	68.5284	143.237	53.8105	92.9045	85.2347	41.5358	28.0202	24.0776	19.4994
cra_locus_107956_iso_1_len_387_ver_3	Gene of unknown function	5.28957	3.24058	8.12045	4.72655	3.52528	5.83922	3.40213	2.87969	0	0	8.3007	9.5352	6.12482	4.90551	6.57828	6.16573	4.54526	8.5469	7.46415	0	4.28961	3.86585	4.60567
cra_locus_107957_iso_1_len_331_ver_3	Gene of unknown function	37.6225	2.4262	2.52115	0	9.67764	13.844	4.99322	7.05493	0	3.27581	7.96564	0	7.49476	13.8473	36.042	3.75329	17.7807	32.9282	16.979	34.7277	84.6295	20.9495	87.3552
cra_locus_107959_iso_1_len_278_ver_3	Gene of unknown function	0	10.0539	15.5669	13.5912	0	0	0	22.3575	13.6658	14.899	21.3113	31.8647	2.84063	3.77023	4.87453	0	7.84195	0	5.51081	0	0	0	0
cra_locus_10795_iso_1_len_1256_ver_3	UDP-glucuronic acid/UDP-N-acetylgalactosamine transporter	1.7638	0	0	0	11.5308	7.11546	4.44322	0	0	0	0	0	1.90232	3.18838	35.41	22.6573	9.74731	1.52394	9.94726	7.7033	6.70486	7.7344	10.4517
cra_locus_107963_iso_1_len_354_ver_3	Purine transporter	11.1539	0	3.83357	2.36658	3.88324	9.45902	2.67684	6.55566	5.61809	7.80021	5.22488	2.83875	3.04691	4.56586	1.94691	1.83562	3.75509	7.06105	4.88878	0	5.73771	0	6.20073
cra_locus_107964_iso_1_len_432_ver_3	Gene of unknown function	1.4768	6.81803	5.66791	7.63413	4.77987	2.5936	3.88574	3.92248	10.9149	11.6604	3.51135	6.63902	2.6327	1.63158	3.98454	3.10871	0	4.00717	4.83861	0	0	2.69828	2.72759
cra_locus_107966_iso_1_len_608_ver_3	Gene of unknown function	4.57881	21.9349	14.7042	30.0216	3.78581	4.35376	6.01018	8.42787	19.351	18.3677	11.9756	16.4123	7.57404	4.52521	5.62427	8.03678	5.05867	3.22948	5.73774	3.35437	3.97845	3.75616	4.90441
cra_locus_10796_iso_1_len_806_ver_3	Conserved gene of unknown function	58.7005	41.6492	49.1736	40.1892	57.9605	58.081	54.4153	58.1142	41.8711	48.5416	49.5366	41.5583	35.9576	45.4922	56.6374	49.2924	58.5333	72.9615	62.647	71.3216	65.9278	61.0689	56.1163
cra_locus_107972_iso_1_len_322_ver_3	Gene of unknown function	9.6022	4.58465	13.4655	7.61263	14.9624	21.194	6.92811	17.5927	8.21447	4.64259	18.3525	12.2803	9.41481	14.2801	25.9588	6.10829	36.0984	45.2529	20.9514	7.51242	7.86185	8.43476	12.5053
cra_locus_107977_iso_1_len_1178_ver_3	Calcium-dependent protein kinase	19.4476	17.0583	17.47	19.6803	21.1585	22.3674	16.5565	19.9786	27.4481	25.7225	14.9636	19.2709	14.8358	17.0289	35.2498	17.4975	35.4048	36.7642	34.0047	31.8908	37.0412	38.2	32.6067
cra_locus_107979_iso_1_len_309_ver_3	Gene of unknown function	10.8209	15.919	14.3378	24.7223	9.72634	10.9792	12.221	10.0638	18.9702	17.666	10.1077	13.8389	11.8728	9.05179	8.44412	11.5054	17.1438	5.46391	14.7021	0	4.70106	6.00193	3.27149
cra_locus_107980_iso_1_len_558_ver_3	Gene of unknown function	3.98882	9.46476	9.29001	11.05	2.5113	2.55697	2.6313	4.28742	2.03956	6.19478	8.42623	10.813	3.61013	5.57663	2.37791	2.70658	3.3836	2.24937	3.68612	0	2.07356	0	0
cra_locus_10798_iso_1_len_1497_ver_3	Pentatricopeptide repeat-containing protein	21.0817	7.57002	8.53427	8.59255	6.65143	9.54922	3.16066	10.8618	14.4732	14.1099	9.06109	8.04443	14.1175	11.9102	18.8146	10.4848	16.2388	24.2013	12.1516	12.3481	11.6566	10.4377	10.8574
cra_locus_107997_iso_1_len_408_ver_3	GTP-binding protein engB	7.70885	2.41659	0	2.23233	0	0	3.21362	0	0	3.26284	0	0	7.27847	0	0	4.09261	0	0	0	24.9392	23.1539	23.4749	10.3928
cra_locus_107998_iso_1_len_294_ver_3	Gene of unknown function	0	3.22577	0	0	2.75721	3.94423	0	0	0	3.73319	3.20394	4.87409	0	2.91383	2.3962	3.60197	7.36847	0	4.63302	0	7.03681	0	5.185
cra_locus_10799_iso_2_len_1750_ver_3	Calcium ion binding	7.89093	7.13127	8.28514	7.32938	21.7296	15.612	9.30128	7.26823	4.34021	5.35317	12.2102	11.901	22.4813	25.2279	6.43607	8.66613	4.49112	5.08681	4.65804	4.58931	2.93191	4.65269	3.19355
cra_locus_1079_iso_1_len_2081_ver_3	Asparaginyl-tRNA synthetase, chloroplastic/mitochondrial	21.1726	7.82582	8.53408	8.84584	27.2234	21.693	22.894	9.64613	14.9244	13.1376	7.99943	8.72239	27.3	28.4184	8.63257	9.53592	10.0313	9.69231	9.36194	7.88735	10.4774	7.22627	8.70484
cra_locus_107_iso_7_len_2412_ver_3	3-hydroxybutyryl-CoA dehydratase	66.9781	69.5661	44.8764	45.7029	61.9082	67.521	67.9282	58.1151	62.7944	81.0574	40.5282	37.0122	46.274	53.0899	54.1842	58.5811	59.3728	58.3153	54.6125	60.6366	60.6683	65.3354	69.8826
cra_locus_108008_iso_1_len_355_ver_3	Gene of unknown function	35.8485	241.615	231.007	221.068	47.0672	34.7024	16.9013	215.884	157.333	213.942	226.151	263.477	116.512	115.477	75.8694	81.8005	48.4168	32.5898	198.496	41.7033	59.5564	13.9489	10.3965
cra_locus_10800_iso_5_len_1528_ver_3	Gag-pol polyprotein	1.37157	24.1549	37.2637	34.3778	1.15211	1.72269	1.7798	33.1952	28.4031	33.6584	23.2699	27.881	0.660604	0.977963	0.682378	1.39294	0.868421	0.96391	2.21624	1.29565	0.878117	0	0
cra_locus_108016_iso_1_len_456_ver_3	Myosin heavy chain	3.80127	0	0	0	5.13345	3.02378	2.30906	0	0	0	0	0	1.65648	1.41055	5.10005	10.1991	11.2418	2.98574	9.13329	3.33552	0	4.63023	0
cra_locus_108019_iso_1_len_482_ver_3	Gene of unknown function	7.04675	1.61746	2.59755	2.54682	3.8124	4.20749	3.32882	1.82063	2.38174	2.32036	0	0	4.52808	8.33451	3.91911	5.66287	6.46571	2.06388	7.81195	3.14408	2.90574	5.67382	2.42653
cra_locus_10801_iso_2_len_3542_ver_3	Nucleic acid binding protein	10.1725	138.526	146.897	161.928	7.61992	8.61445	30.8811	80.974	88.2629	89.133	194.914	248.336	9.0403	10.0422	5.52166	8.59283	1.96852	4.8509	2.22023	2.01624	1.25629	2.67329	3.39814
cra_locus_10802_iso_4_len_2140_ver_3	ATP binding protein	13.0969	12.2061	8.85297	11.5134	10.9815	11.4171	11.237	8.88817	10.7331	9.95855	8.31213	7.25489	7.50541	5.55015	12.9357	14.0171	14.7612	16.2661	12.8978	17.3579	17.5111	16.5305	16.2288
cra_locus_10803_iso_1_len_1152_ver_3	Calcium ion binding protein	14.2609	0.70683	1.23272	1.71224	12.4212	6.67943	5.88762	0.612009	8.86851	5.01034	0.882058	0.985854	2.58237	2.56533	156.893	12.0059	73.8255	55.4013	109.585	49.0013	25.2007	26.9365	11.1749
cra_locus_108043_iso_2_len_446_ver_3	EMB1135	24.0033	18.4496	13.611	20.6579	30.9022	29.4885	30.7377	16.9761	26.4707	22.5379	17.137	16.8147	20.3545	14.4479	27.6314	26.4668	18.3402	25.4779	22.8612	33.5341	29.9876	32.7147	32.2912
cra_locus_108045_iso_1_len_409_ver_3	Suppressor of ty	117.456	63.7012	111.103	57.4743	132.316	131.693	72.0304	148.025	73.3763	72.1552	104.26	141.774	36.6662	77.9203	64.7903	63.0246	88.4191	248.486	108.613	53.4895	41.8519	57.0949	59.7781
cra_locus_108048_iso_1_len_325_ver_3	Gene of unknown function	22.1098	49.5991	33.0722	40.7875	26.8102	27.411	27.4265	55.7111	51.0231	40.0966	59.1432	37.5461	19.8302	23.793	19.0691	38.186	12.0876	19.2331	14.3924	27.5465	29.4483	25.0359	30.9392
cra_locus_10804_iso_1_len_973_ver_3	3-5 exonuclease	99.4976	25.6785	21.2637	20.3691	95.062	104.209	41.7169	34.5099	39.9147	36.3519	27.8817	21.208	39.5619	76.186	222.991	134.04	142.897	98.0494	191.109	207.248	47.409	184.202	34.3506
cra_locus_108050_iso_1_len_472_ver_3	Gene of unknown function	14.5338	16.8154	24.2182	20.4872	10.4959	13.0462	7.85529	27.6156	18.1726	12.8407	19.0061	26.0326	7.02528	16.0612	27.6722	21.1428	27.3649	26.2849	33.2574	5.26099	6.19027	6.47134	8.89136
cra_locus_10805_iso_3_len_1270_ver_3	Gene of unknown function	1.76555	8.38883	10.3742	9.04868	3.42543	2.35314	1.8694	9.41489	8.29276	9.24219	4.47548	8.69812	3.53374	4.07168	5.17801	5.43216	1.77013	4.17779	4.13188	1.56501	1.06068	1.59316	0
cra_locus_108064_iso_1_len_300_ver_3	Transcription factor	7.38699	6.30871	8.42866	8.79826	6.61787	6.12567	2.14015	11.9197	10.1063	6.84475	6.266	8.17059	3.13204	7.52713	7.23937	4.40278	8.40622	7.52716	16.5228	0	0	0	3.38014
cra_locus_108065_iso_1_len_279_ver_3	Gene of unknown function	6.9254	8.30406	4.98363	5.84545	0	7.8699	3.94388	0	6.63956	12.3662	8.49043	7.7498	5.65854	4.19659	5.77933	2.38631	5.20705	6.11958	13.5775	0	0	0	5.12969
cra_locus_108093_iso_1_len_286_ver_3	Gene of unknown function	2.10524	0	0	0	4.91071	4.30624	5.86752	3.47655	8.39633	7.69879	0	0	0	0	0	0	4.1155	3.9686	3.9342	0	5.12178	0	3.92069
cra_locus_108094_iso_1_len_298_ver_3	Gene of unknown function	0	0	0	0	4.93857	4.79983	5.39017	3.83245	3.0853	0	0	0	27.3461	35.666	4.71978	4.87906	16.9374	0	22.8207	0	0	0	0
cra_locus_10809_iso_1_len_946_ver_3	Gene of unknown function	9.26329	56.0653	72.4629	70.2877	8.33013	6.90601	2.59316	50.7408	35.2975	64.1909	51.5413	79.3814	4.01096	4.09415	27.4493	14.6379	13.1312	22.4303	13.4675	20.0501	20.6943	16.9251	14.3846
cra_locus_1080_iso_5_len_2845_ver_3	C3HL domain class transcription factor	13.5454	22.3768	21.5566	26.1933	11.4519	10.8295	14.0052	24.3333	28.0283	30.2567	17.3869	23.1468	17.8337	16.2573	35.1793	26.0367	16.064	17.7775	16.4651	18.8976	13.0882	22.0108	15.2561
cra_locus_108104_iso_1_len_672_ver_3	4-coumarate--CoA ligase-like 6	0	6.83712	4.19824	5.86124	3.92551	9.56199	11.2749	9.51299	20.5227	21.7322	6.71224	3.87404	0	1.61154	4.88253	2.22672	4.04903	4.22988	3.7065	5.23553	5.1178	4.76596	10.542
cra_locus_108109_iso_1_len_409_ver_3	Polyprotein	1.56619	13.1759	9.83612	14.978	0	0	2.2894	5.96854	5.67857	8.6234	6.14439	11.6538	0	0	5.43719	2.66889	2.78338	0	0	0	0	0	0
cra_locus_10810_iso_8_len_3580_ver_3	Protein kinase	25.7039	34.7338	33.8581	32.8579	27.0577	28.3264	29.3666	29.845	25.686	25.3871	28.5924	31.983	21.7315	21.3037	36.4166	29.1484	35.2614	37.7459	42.9744	42.0049	32.3422	37.2204	32.0129
cra_locus_108119_iso_1_len_511_ver_3	Gene of unknown function	5.83702	2.28022	0	1.59572	3.58302	1.78583	4.45214	0	5.85438	4.4898	0	0	4.1089	3.06305	4.15578	5.5697	2.53196	0	2.84687	2.68628	2.73091	2.05094	0
cra_locus_10811_iso_5_len_2557_ver_3	BRASSINOSTEROID INSENSITIVE 1-associated receptor kinase 1	47.256	5.2654	4.95582	8.21469	7.40961	6.42076	6.19443	3.72461	7.94488	5.25856	3.89033	5.98519	6.96686	6.49882	3.65909	5.85249	4.89191	3.93367	4.37095	3.53403	1.43189	5.04444	1.52186
cra_locus_108129_iso_1_len_730_ver_3	Serine-threonine protein kinase, plant-type	0	13.7623	10.4665	9.21649	1.13707	0	0.992837	6.37284	12.313	9.87883	1.11026	5.65929	0	0	0.976507	0	4.4104	3.03117	9.47832	2.77059	0	2.82041	0
cra_locus_10812_iso_4_len_2526_ver_3	PBng143	15.9259	18.0464	14.9966	14.1999	12.9283	10.4648	5.66743	16.3771	21.4715	17.3335	18.3047	15.9616	13.7668	12.6599	35.4325	17.6321	27.7283	26.516	21.4898	12.0819	6.80904	16.984	7.22688
cra_locus_108133_iso_1_len_413_ver_3	ABC transporter A family member 2	3.09975	0	0	0	29.4064	7.36522	5.73941	2.86369	2.80971	3.5424	0	0	0	0	23.7608	0	7.62752	7.30418	12.2249	6.06932	0	10.8123	0
cra_locus_10813_iso_2_len_1741_ver_3	Nucleoside transporter	8.75409	82.1019	23.7327	12.4895	24.0165	22.1226	23.6465	44.9627	24.0451	24.4868	7.811	11.9636	9.00674	8.65443	38.2228	13.0327	67.0556	69.5046	53.7015	58.3864	74.7081	61.1782	61.692
cra_locus_10814_iso_2_len_1020_ver_3	Peroxidase 15	0	0.985821	1.18738	0	8.98162	8.49975	4.62347	1.87253	3.01494	3.49398	3.7126	1.95505	0	0	12.1202	1.08359	58.3725	16.5528	47.1511	66.1112	5.20232	49.9763	3.32761
cra_locus_108150_iso_1_len_645_ver_3	RNA-directed DNA polymerase ; Ribonuclease H	4.21595	2.47805	2.69677	2.24748	3.66625	2.6949	1.50645	5.46705	2.42516	3.21199	1.1486	2.54612	3.67438	3.09982	3.52246	3.29279	10.4342	6.7609	6.44827	3.57328	0	3.37007	1.63574
cra_locus_108156_iso_1_len_444_ver_3	Gene of unknown function	31.6806	8.97498	8.17263	2.22401	14.085	16.7413	4.47215	16.0643	2.59983	11.9192	16.8786	9.55942	3.5792	10.6908	2.7628	1.4671	20.3891	26.0103	15.6623	11.2319	14.2731	7.86079	7.94617
cra_locus_108159_iso_1_len_624_ver_3	Gene of unknown function	2.8189	10.8778	10.8188	13.9608	1.228	0	1.85204	2.65674	2.37127	1.55876	2.97284	10.699	0	1.28406	1.34394	1.00265	1.50414	0	1.94207	0	0	0	0
cra_locus_10815_iso_1_len_2350_ver_3	GDP-fucose protein-O-fucosyltransferase 2	21.7724	19.9146	15.9548	19.3196	19.432	19.0464	25.6631	16.6714	13.302	14.492	16.9187	18.7222	20.2657	18.5287	30.2995	36.8073	29.4453	17.8338	25.0174	29.9012	22.3542	26.3217	19.7332
cra_locus_108162_iso_1_len_423_ver_3	Gene of unknown function	7.41537	15.4973	14.2299	19.5213	4.88906	4.68149	6.47696	11.164	20.0114	16.3208	18.1373	17.0938	9.15564	12.5199	10.3374	10.2962	12.5964	3.23582	16.8637	4.60077	6.12491	4.26533	3.48737
cra_locus_108164_iso_1_len_291_ver_3	Gene of unknown function	4.13013	5.82627	8.71819	9.39405	2.78878	3.75472	3.09914	5.24646	3.80127	5.19191	10.532	6.69058	3.50959	6.73792	4.62796	4.55402	6.83177	6.1637	4.41042	0	0	0	0
cra_locus_108168_iso_1_len_342_ver_3	Serine/threonine protein kinase	3.97575	7.21787	6.19195	6.38901	0	2.75007	0	7.90489	13.7882	15.0133	6.10335	5.89518	0	1.58125	0	0	0	0	0	0	0	0	0
cra_locus_10816_iso_1_len_1207_ver_3	Myb-like DNA-binding domain, SHAQKYF class family protein	8.26727	10.4184	9.75386	7.76973	5.24398	5.11493	8.36986	20.887	12.7521	14.0668	35.4369	12.1394	0	8.62686	5.40783	5.11496	0.897863	2.09239	2.14578	2.08837	8.10115	0	1.63297
cra_locus_10817_iso_3_len_2000_ver_3	Receptor-like serine/threonine-protein kinase	3.12934	3.40767	1.75589	1.52189	14.4912	13.1015	18.1851	2.75473	3.2423	2.82333	2.58461	1.54468	10.2635	14.4781	6.16501	11.7741	9.41153	6.81333	7.36497	7.2918	2.33741	6.36967	2.60258
cra_locus_108182_iso_1_len_255_ver_3	Gene of unknown function	9.09725	11.3473	27.2581	11.5711	15.5773	19.5877	7.18562	56.5643	39.2939	28.4532	23.7933	16.7373	5.94648	35.5046	18.452	2.90369	21.9601	17.2997	21.091	0	0	6.99861	0
cra_locus_108189_iso_1_len_311_ver_3	F-box and wd40 domain protein	5.94768	0	0	0	3.06209	2.61632	2.05667	3.65578	6.18044	5.2622	3.01079	0	0	3.32107	3.27147	4.65414	0	60.5809	0	0	0	0	0
cra_locus_10818_iso_1_len_1365_ver_3	C-8,7 sterol isomerase	21.2207	85.0991	53.7002	70.2357	26.3507	29.039	38.0288	96.4568	123.001	115.295	56.8783	43.2294	16.9418	19.4339	32.425	23.0414	33.0678	39.0617	36.0022	32.8543	55.9952	31.5212	53.7543
cra_locus_108191_iso_1_len_1480_ver_3	Polyprotein	0.596606	134.027	113.247	147.44	0	0	0	103.827	139.363	124.471	98.8161	134.797	0.487469	0.374232	0	0.575608	0.672862	0	1.31881	1.24928	1.66314	0	0
cra_locus_108193_iso_1_len_279_ver_3	Aminotransferase family protein	21.4255	73.0269	103.272	137.522	3.98543	0	0	38.2131	16.5989	22.5064	145.469	124.735	10.1854	4.19659	4.39229	0	0	5.43963	0	0	0	0	11.3586
cra_locus_108199_iso_1_len_477_ver_3	Gene of unknown function	0	5.04284	3.39906	6.69562	0	0	0	4.29554	7.41022	6.62474	4.26417	5.14841	1.8946	0	0	0	1.99768	1.89719	3.38534	0	2.69332	0	0
cra_locus_10819_iso_5_len_1328_ver_3	EID1-like F-box protein 1	12.9535	7.52077	4.79565	8.17098	10.8405	8.89832	13.9749	5.55543	10.8615	10.7573	6.86294	5.18472	13.885	10.7057	13.2183	13.9155	17.1614	13.0207	21.0713	22.2277	12.9198	19.4819	13.1162
cra_locus_1081_iso_3_len_1864_ver_3	Homeobox-leucine zipper protein	100.691	10.3152	10.9389	9.13745	31.8183	25.7662	18.9324	19.5137	15.1516	13.5792	2.62193	9.80415	27.4062	22.5031	69.6052	26.4639	37.9533	61.1865	33.0208	24.9079	11.1784	24.5657	14.9757
cra_locus_108205_iso_1_len_408_ver_3	Potassium transporter	7.99436	2.89991	4.56577	0	6.6599	8.43574	16.9863	14.5074	15.3288	10.1148	6.34729	6.81601	2.0529	4.77476	7.42041	3.62038	6.01078	10.7644	6.86001	0	0	0	2.90032
cra_locus_10820_iso_2_len_2159_ver_3	Jumonji domain protein	24.6646	1.83464	1.91728	1.01107	17.0269	15.9915	19.9862	3.5171	4.8316	8.91178	10.065	1.8192	14.412	19.8375	19.5099	13.1919	19.6716	15.2032	12.8844	27.1723	19.3119	32.4877	22.6209
cra_locus_108213_iso_1_len_564_ver_3	Regulatory protein rop	6.57347	3.42388	0	0	0	0	3.14383	0	0	1.73358	0	0	5.55278	0	1.38922	2.78774	0	2.22415	0	25.8957	19.888	17.7385	8.5609
cra_locus_108217_iso_1_len_641_ver_3	Gene of unknown function	16.09	9.37838	15.3816	13.573	16.2803	20.7959	9.8559	18.8667	16.2734	15.3567	15.723	17.0348	9.24599	20.7719	30.5114	12.3799	33.6342	42.2193	29.7379	13.9634	24.7344	18.4142	15.4166
cra_locus_10821_iso_1_len_499_ver_3	Gene of unknown function	0	0	0	0	0	0	0	0	0	0	0	0	0	0	0	0	0	0	0	0	0	0	0
cra_locus_108220_iso_1_len_683_ver_3	Gene of unknown function	4.3019	10.0832	8.14942	3.05774	5.38297	6.29878	4.25675	12.926	3.93399	6.54289	6.05841	2.82139	3.46088	3.25184	4.97432	3.46635	72.0299	20.2738	62.5029	5.54343	8.05075	11.9412	8.68395
cra_locus_10822_iso_1_len_1476_ver_3	Glycerol-3-phosphate dehydrogenase	0.897383	0	0	0	4.68226	2.76188	3.04621	0	0	0.512765	0	0	1.46645	5.96679	1.17831	2.63862	2.19285	0	2.79499	4.02664	0	4.50895	0
cra_locus_108237_iso_1_len_653_ver_3	Deleted in malignant brain tumors 1	4.68214	9.68729	17.4152	7.76534	14.5834	11.8238	5.76264	12.8866	5.85218	5.25166	9.97807	15.5244	36.8395	0	0	10.899	0	0	0	9.9599	9.66832	14.5748	7.78027
cra_locus_10823_iso_1_len_1483_ver_3	GDSL-motif lipase/hydrolase family protein	37.0993	0	0	0	33.2119	21.3966	27.0844	0	0	0	0	0	58.7648	76.7455	1.25079	43.2456	0	0	0	0	0	0	0
cra_locus_10824_iso_4_len_1837_ver_3	Multidrug resistance pump	47.2219	53.1567	35.9485	45.8165	49.6709	364.617	103.614	57.6667	66.6067	101.467	131.567	104.353	121.981	99.0738	143.557	16.3663	53.3251	191.378	37.828	34.5897	515.089	28.0491	354.095
cra_locus_108253_iso_1_len_305_ver_3	Gene of unknown function	2.54841	11.9464	7.27282	7.52418	4.33199	5.3464	2.52166	4.23329	6.3148	11.2012	13.074	10.6968	2.81902	0	5.64284	5.18762	7.36958	10.1623	6.54173	0	0	3.93989	4.31457
cra_locus_108259_iso_1_len_410_ver_3	Conserved gene of unknown function	7.52638	17.4684	13.0804	14.7368	5.5789	7.58459	5.02347	15.3332	12.8522	21.584	16.5277	15.982	5.19814	8.05952	7.38094	6.10669	4.27088	2.67698	9.28822	3.39839	5.18228	3.89194	0
cra_locus_10825_iso_1_len_1793_ver_3	UDP-glucose:glucosyltransferase	3.28186	8.20354	7.69079	7.01991	6.21311	9.34105	2.76182	16.5198	7.15145	6.90515	4.9335	5.28243	0.681656	1.13827	9.72399	0.71021	18.3107	17.5867	26.8166	9.68889	9.20314	7.78962	4.67355
cra_locus_108261_iso_1_len_289_ver_3	Ribonuclease p/mrp subunit	8.73999	5.16655	3.72708	4.73316	3.83214	3.78361	6.24596	4.4938	7.34182	8.5612	6.80323	4.96782	2.9925	5.30529	5.9969	7.80138	3.75509	5.23041	14.4441	6.97193	5.90647	5.70319	0
cra_locus_10826_iso_8_len_1340_ver_3	Gene of unknown function	5.86031	17.3257	19.0598	32.3848	28.0692	32.8853	24.4203	10.0655	9.62255	7.5461	8.68904	23.9973	33.4506	34.1838	35.4743	48.1448	45.3656	25.6733	40.2144	28.2463	10.5424	27.4472	17.2583
cra_locus_108273_iso_1_len_540_ver_3	Zinc finger protein	14.8232	11.3515	15.0354	18.062	9.74909	11.5507	10.3284	14.1223	36.3811	27.709	10.3846	17.3325	8.02827	10.9083	11.7528	10.0402	16.8771	23.7851	11.3066	9.88194	14.8116	13.5418	10.9348
cra_locus_10827_iso_4_len_1840_ver_3	Protein ELC	41.6167	16.7905	24.4611	19.8337	27.8019	28.9255	23.7629	27.2486	29.4216	31.2739	32.6615	27.0512	14.3729	21.7235	32.0506	20.1274	37.8723	55.0984	31.1454	41.8965	37.3714	44.3785	33.1809
cra_locus_108286_iso_1_len_372_ver_3	Gene of unknown function	2.20836	0	2.62339	3.58782	3.29214	3.7643	3.38182	2.20413	5.56523	3.42504	2.06279	4.03467	0	0	0	2.60893	3.79523	2.47796	0	0	0	0	2.6706
cra_locus_108288_iso_1_len_427_ver_3	Gene of unknown function	6.11188	8.12591	2.08612	6.56456	0	0	0	2.24368	11.0471	18.6307	1.95508	3.93468	2.48468	2.3395	0	4.64421	0	0	0	0	0	0	0
cra_locus_108292_iso_1_len_1126_ver_3	Polyprotein	0	27.0509	19.1183	27.4141	0	0.896753	0.687308	20.0485	18.3087	22.3764	29.9268	23.6326	0.644775	0	1.40038	1.84901	5.11746	0	1.18502	0	0	1.53194	3.00607
cra_locus_108294_iso_1_len_1069_ver_3	ATP-binding cassette transporter	12.2776	29.0619	16.8716	15.013	13.1249	79.2486	19.63	82.7387	33.6366	54.1615	8.36798	6.29849	0	0.731976	39.7554	5.6502	97.906	79.2734	88.9563	65.673	286.622	33.5533	328.092
cra_locus_108295_iso_1_len_332_ver_3	Gene of unknown function	14.8208	12.494	22.1586	13.9613	17.5376	28.4083	7.84794	23.8169	12.5998	16.9372	39.9303	22.532	23.3438	15.2536	26.7982	11.2227	20.4072	28.0509	21.9284	0	6.87834	3.26255	5.44168
cra_locus_10829_iso_5_len_1026_ver_3	Ubiquitin-conjugating enzyme 15	72.2843	39.6855	41.5164	31.0895	52.1663	67.2804	48.0507	55.6309	43.1205	37.2722	45.5605	34.5164	35.0467	35.6759	68.1133	58.1019	56.9603	101.106	50.7066	76.7522	85.3767	81.3053	85.9053
cra_locus_1082_iso_2_len_1086_ver_3	Water channel protein	39.6188	0.866499	0	0	262.113	192.013	280.718	1.36547	1.17778	1.05294	0	0	93.0153	207.248	273.604	245.798	312.971	92.4723	218.131	275.249	53.1334	303.132	73.9226
cra_locus_10830_iso_3_len_1683_ver_3	Calmodulin binding protein	2.74776	0.516826	0.50218	0.465017	10.2407	10.4083	18.76	0.872613	0	0	0	0	4.23365	8.13842	15.765	11.6863	39.4504	19.2187	29.5607	23.7195	24.2064	28.8079	30.0724
cra_locus_10831_iso_5_len_3010_ver_3	Nucleic acid binding protein	19.8378	20.9744	24.125	28.2525	48.5756	49.5416	52.7451	14.917	14.3104	13.6065	13.0779	21.5097	97.5202	130.357	38.0818	54.0141	34.3072	36.6949	31.7858	32.6194	24.2491	35.6489	25.9041
cra_locus_108321_iso_1_len_370_ver_3	Conserved gene of unknown function	6.50526	11.1017	10.9611	6.54106	7.40206	5.76972	3.23157	4.43411	5.1111	7.43421	7.46959	11.0928	5.60047	6.9253	8.25962	4.72362	6.9192	13.2102	9.107	6.83465	4.82514	6.95756	4.29803
cra_locus_108328_iso_1_len_486_ver_3	Gene of unknown function	2.95978	8.68458	18.3266	33.8286	0	0	0	3.45899	6.17464	4.32952	37.1573	44.01	0	0	0	0	0	0	0	0	0	0	0
cra_locus_10832_iso_1_len_1739_ver_3	Transposon	0.632804	0.999801	0.688124	0.989534	1.55377	1.22248	0.881844	1.40673	1.21337	1.19323	0.662022	0	0.703182	1.52344	1.12943	1.25595	1.76043	0.695858	1.30926	1.43865	1.02635	0.924962	0.964228
cra_locus_108338_iso_1_len_310_ver_3	Gene of unknown function	56.8003	21.9466	33.2538	23.8132	18.2015	42.4478	12.5904	11.9847	59.9569	35.8663	16.3665	15.103	16.8649	18.6262	29.3447	8.27988	39.3772	95.2781	93.5527	5.52934	19.5181	0	22.8189
cra_locus_10833_iso_3_len_3697_ver_3	Ran GTPase binding protein	27.7309	35.3738	31.8346	28.0144	30.4231	31.362	24.1765	41.5595	35.6143	36.6468	32.8499	30.3843	18.2422	23.7256	41.8402	34.6593	44.5618	54.2915	45.2856	54.8202	49.5227	56.381	48.8975
cra_locus_108342_iso_1_len_357_ver_3	Oxidoreductase	5.11356	8.37659	10.0236	7.97277	4.86028	4.4988	2.82918	6.60022	4.55458	7.44588	9.27409	10.2664	3.23469	3.01524	3.68189	6.00214	3.84447	3.6278	4.29335	0	0	3.61666	0
cra_locus_108344_iso_1_len_603_ver_3	Gene of unknown function	2.63925	5.5315	8.5617	5.62784	2.31442	3.32054	2.52605	11.6144	11.5672	14.7575	17.8733	22.1809	1.72517	1.14124	0	1.14326	2.97659	1.77688	1.76148	0	0	0	0
cra_locus_10834_iso_3_len_1023_ver_3	Conserved gene of unknown function	0	0	0	0	4.41043	5.62878	2.85907	0	0	0	0	0	1.92129	4.86971	5.4404	5.34158	3.0285	1.53913	2.90626	1.3026	5.9591	1.98904	7.46452
cra_locus_108354_iso_1_len_378_ver_3	Gene of unknown function	8.06145	11.3721	10.1148	14.3249	4.94848	7.04683	2.82513	3.74167	10.4635	10.0985	7.70383	11.8959	16.2136	8.49463	0	4.10253	0	0	4.13872	0	0	0	0
cra_locus_10835_iso_5_len_1373_ver_3	AT-P4H-1	11.6541	32.2551	35.9208	30.1868	12.1577	12.0993	11.7592	41.8548	27.8494	30.4084	39.1923	34.0128	9.89378	10.7902	20.726	17.6883	24.1226	32.0302	25.6578	20.9532	22.8111	22.9845	19.2875
cra_locus_108360_iso_1_len_339_ver_3	Gene of unknown function	6.1086	7.28772	9.60109	7.69138	2.1427	2.97501	2.058	3.54729	2.67724	5.38527	7.76007	11.3092	3.65067	1.95165	3.15684	3.46399	4.72414	0	11.8815	0	0	0	0
cra_locus_108366_iso_2_len_1055_ver_3	Gene of unknown function	0.870042	24.9631	34.8763	25.673	1.42414	0.958809	1.10224	14.6025	10.2726	17.1143	15.8257	41.6322	1.17197	1.80178	0.998505	1.59894	6.02612	2.44369	0	0	0	3.56496	2.90151
cra_locus_10836_iso_1_len_1506_ver_3	UDP-glucose:flavonoid glucoside 1,6-glucosyltransferase	3.91957	1.40556	1.35904	2.13505	4.49721	5.61959	4.77087	1.69838	2.36003	3.47459	4.64665	2.87335	3.32822	3.6027	5.96376	2.74659	3.9661	3.74043	6.3077	4.03251	5.42145	3.27956	5.70572
cra_locus_108370_iso_1_len_410_ver_3	Gene of unknown function	15.3368	8.49381	33.6094	39.3653	4.7072	5.97085	0	14.6116	44.6558	198.313	30.827	69.2552	0	0	4.06705	0	18.1512	30.5622	47.1993	0	0	0	0
cra_locus_108371_iso_1_len_795_ver_3	Gene of unknown function	5.79189	1.75366	0	0	0	2.88957	0	2.87117	0	69.0149	33.8066	4.69729	0	0	0	0	0	0	0	0	3.29361	0	0
cra_locus_108376_iso_1_len_311_ver_3	Gene of unknown function	5.18024	6.92871	3.68176	7.90958	4.23982	4.36054	6.99269	3.65578	0	3.28888	3.76349	5.23458	5.76891	2.735	2.65807	6.34656	3.46214	0	7.68305	5.50973	4.27875	3.50551	3.24829
cra_locus_10837_iso_1_len_2637_ver_3	Pentatricopeptide repeat-containing protein	7.84186	15.8735	15.5792	15.3061	9.67831	8.8642	6.60486	15.8645	14.7341	15.7422	13.4562	14.3271	10.4416	11.3716	9.70429	10.7969	7.08158	7.6586	9.16604	10.0783	8.45398	8.9455	6.46269
cra_locus_10838_iso_3_len_1108_ver_3	Homology to unknown gene	18.5531	10.2992	14.9468	18.5334	78.0587	68.8913	73.1025	8.79013	9.99934	8.8821	10.8196	13.7663	89.3489	112.863	7.01376	22.1159	2.11129	2.12682	1.94106	1.31999	1.82989	1.46588	1.86769
cra_locus_10839_iso_1_len_1184_ver_3	3'-N-debenzoyl-2'-deoxytaxol N-benzoyltransferase	0	1.32163	0	0	0	2.66163	0	1.96368	0	0	0	0	0	0	1.4775	0	23.6684	28.037	10.5048	6.61407	0	6.59036	1.90341
cra_locus_1083_iso_1_len_4176_ver_3	Mannosidase alpha class 2a	18.5133	27.5481	24.4522	31.066	23.8338	26.6424	28.3907	27.0307	23.7756	21.157	18.6481	27.2307	18.4206	19.1006	31.5321	42.927	18.54	20.0034	17.955	22.9171	24.0702	21.6209	19.5264
cra_locus_108401_iso_1_len_589_ver_3	DNA binding protein	3.28493	10.6854	9.76456	15.3828	2.13505	3.40356	8.59616	8.95927	20.6004	29.2593	16.4249	21.0879	0	1.36504	1.73484	2.34369	0	0	2.57931	0	3.13404	2.47138	2.45362
cra_locus_108408_iso_1_len_314_ver_3	PDR8/PEN3 (PLEIOTROPIC DRUG RESISTANCE8)	12.9092	13.7116	12.3862	8.36606	8.8565	77.4478	5.49457	91.8794	23.0055	30.1561	8.19252	5.82692	0	0	47.1304	0	95.3485	77.8367	107.444	31.3475	115.85	12.8338	121.493
cra_locus_10840_iso_1_len_1897_ver_3	Protein phosphatase 2c	35.8864	6.99501	6.00277	7.16435	46.5464	29.3265	13.9717	8.53589	7.59746	7.51371	4.84821	7.9517	57.214	41.711	11.8869	36.8229	14.7215	9.82802	17.5912	14.7639	2.4663	10.1078	1.56919
cra_locus_108410_iso_1_len_319_ver_3	Gene of unknown function	8.58213	0	0	0	5.26809	36.0421	56.9982	0	0	0	7.56332	0	0	0	14.3084	0	50.78	10.551	46.5699	0	10.5909	9.54465	23.0583
cra_locus_10841_iso_2_len_1342_ver_3	Gene of unknown function	0	0	0	0	0	0	0	0	0	0	0	0	0	0	0	0	0	0	0	0	0	0	0
cra_locus_108428_iso_1_len_336_ver_3	Gene of unknown function	4.05345	6.56337	5.86204	8.76868	3.89455	2.40327	2.45595	4.25357	5.40681	5.6393	5.99216	7.81351	0	1.97104	4.50099	3.30352	7.15546	4.42966	8.46887	6.32632	0	0	0
cra_locus_10842_iso_3_len_2949_ver_3	Conserved gene of unknown function	17.1579	14.763	12.0893	14.3555	9.48586	10.149	11.3414	10.0975	11.5965	13.3191	13.1573	12.9858	8.16323	7.27707	14.9414	13.1778	11.0059	13.9716	13.4795	14.3668	13.8617	12.8647	14.0853
cra_locus_108432_iso_1_len_286_ver_3	Gene of unknown function	4.63153	0	3.50126	0	0	0	2.25674	0	3.55229	3.36822	0	0	0	3.86528	6.9673	2.78557	11.7133	0	7.30637	0	0	3.84651	0
cra_locus_10843_iso_1_len_661_ver_3	Transposon	0	0	0	0	2.20712	2.52939	0	0	0	0	0	0	0	0	0	0	1.54481	0	1.59982	0	0	0	0
cra_locus_108443_iso_1_len_603_ver_3	Gene of unknown function	5.56129	3.93588	6.39113	6.02983	3.70307	3.749	2.93022	5.62761	10.2659	9.15614	3.20487	5.30412	4.18969	5.13559	4.97692	3.63766	7.79584	2.96147	9.81396	0	2.2932	1.89444	3.03211
cra_locus_108446_iso_1_len_491_ver_3	Reverse transcriptase	3.86462	13.4806	12.1355	14.8167	3.59436	4.59115	5.27256	8.03322	15.1795	13.918	7.04473	12.5808	5.51157	4.02598	3.90374	3.61561	5.54708	2.75955	3.12644	0	0	2.56767	1.98272
cra_locus_10844_iso_1_len_1514_ver_3	Galactinol synthase	1.45737	0	0	0	246.193	321.992	18.825	0	0	0	0	0	361.852	150.971	0	1.12486	0	0	0	0	0	0	0
cra_locus_108458_iso_1_len_319_ver_3	Gene of unknown function	46.8286	0	0	0	0	2.33214	0	0	0	4.47741	0	0	0	0	0	0	3.36663	5.56858	2.49037	0	0	0	0
cra_locus_10845_iso_1_len_1203_ver_3	Long chain fatty acid elongation enzyme	17.2361	8.26953	9.07959	5.43769	41.9251	31.6321	33.9393	13.2306	4.24163	8.79537	8.01553	7.22988	14.0982	26.895	9.20539	10.7729	10.4646	14.9138	7.87414	9.37453	4.6717	7.15733	4.60349
cra_locus_10846_iso_1_len_713_ver_3	Ubiquitin-conjugating enzyme E2-17 kDa	192.293	134.17	123.457	177.891	125.079	152.091	200.704	112.789	164.654	157.741	127.025	122.608	91.9307	60.0912	128.206	156.645	113.892	154.704	102.418	114.335	147.298	109.406	145.438
cra_locus_108475_iso_1_len_904_ver_3	Pentatricopeptide repeat-containing protein	1.29851	8.9321	14.7136	11.4272	6.22486	4.42682	3.91074	16.0236	14.1328	11.5182	11.644	14.4452	2.82927	9.57879	6.05434	3.61355	3.53336	3.69117	5.77765	3.25547	3.38477	2.82444	3.35
cra_locus_108476_iso_1_len_253_ver_3	Gene of unknown function	7.97078	17.9907	0	25.0657	0	0	13.2049	0	10.3743	8.55695	0	0	0	0	0	31.4268	0	0	0	0	0	5.29582	0
cra_locus_10847_iso_2_len_1983_ver_3	GTP cyclohydrolase II	0	0	0	0	26.4811	14.9776	0.3265	0	0	0	0	0	19.2214	10.8006	0	0.30531	0	0	0	0	0	0	0
cra_locus_108488_iso_1_len_370_ver_3	Gene of unknown function	0	0	0	0	2.72708	3.96668	2.89141	2.0155	0	0	0	2.97611	2.4891	4.34844	4.04553	3.49898	8.82794	3.98799	2.75328	0	11.902	0	14.5058
cra_locus_108489_iso_1_len_625_ver_3	Gene of unknown function	4.99288	6.5567	3.48408	6.32345	2.22899	3.09481	3.30862	2.88291	0	3.11229	6.05442	6.81111	4.86578	4.12035	5.84582	5.9057	3.68578	3.13737	5.33173	0	2.94474	2.32211	1.99802
cra_locus_10848_iso_1_len_363_ver_3	Tubulin beta-1 chain	231.359	83.9354	33.3607	53.1856	353.862	242.961	459.353	72.7356	160.597	114.109	16.8393	25.2717	293.581	331.733	190.987	694.728	180.731	173.796	145.497	322.906	97.8435	258.168	77.4498
cra_locus_108494_iso_1_len_383_ver_3	Gene of unknown function	4.58515	3.96713	10.5585	3.47633	5.25386	5.03679	0	6.40691	2.57892	8.38385	6.39581	7.55798	4.39576	6.51228	3.57027	6.74097	8.96341	6.24251	5.91638	0	0	0	0
cra_locus_10849_iso_4_len_1585_ver_3	Conserved gene of unknown function	12.2396	34.0613	27.0018	31.9321	17.3743	18.2949	20.7988	29.0197	32.6964	31.7499	18.0067	21.7604	14.2282	20.2011	27.3145	14.2626	23.2159	23.2696	21.4434	19.8878	20.3733	20.2031	16.8957
cra_locus_1084_iso_5_len_1624_ver_3	Chromo domain protein LHP1	47.7614	79.4727	85.5342	75.6118	66.049	54.6992	42.1441	87.8607	97.642	86.3888	56.3367	84.5664	44.1907	77.5633	94.4669	58.1615	71.4749	109.453	70.8169	59.1787	34.8675	58.2596	36.0089
cra_locus_108501_iso_1_len_364_ver_3	Death receptor interacting protein	4.8452	7.10839	10.9508	8.95415	14.0779	13.3979	4.32822	11.2838	4.45941	5.90623	11.6163	12.1177	4.43393	11.9707	16.8196	6.58905	12.629	9.38741	13.1506	0	3.92925	0	2.73438
cra_locus_10850_iso_7_len_1471_ver_3	Conserved gene of unknown function	2.66396	6.43621	8.30414	9.81425	11.0553	9.59349	5.79178	3.62232	3.68353	3.38741	6.13329	8.57335	11.2327	8.51061	6.38501	5.87475	5.1908	4.89217	4.80803	3.86102	3.4231	4.86736	6.28888
cra_locus_10851_iso_1_len_1289_ver_3	YUP8H12R.2 protein	0	0	0	0	0.685325	0	1.56503	0.763652	0.658686	0.539794	0	0	0	0	7.2207	0	1.93715	0	0	0	0	2.3537	3.05339
cra_locus_10852_iso_1_len_2123_ver_3	Pectin methylesterase 2	9.61173	10.8764	15.5028	10.7253	26.8677	22.8728	21.6316	22.2859	16.1312	15.0591	18.1783	17.6677	7.29612	17.8221	20.4968	20.4272	27.1201	28.0067	18.3828	33.7609	6.12889	52.7323	18.0229
cra_locus_108531_iso_1_len_292_ver_3	Gene of unknown function	0	3.9468	2.89501	2.92448	0	3.27289	0	0	3.47125	3.76158	0	0	0	3.14616	4.3905	2.94886	3.09354	4.20123	2.74603	0	0	0	3.83125
cra_locus_108535_iso_1_len_291_ver_3	Gene of unknown function	5.78218	21.9068	19.5499	19.3752	3.80289	6.57077	6.86238	7.34505	3.80127	10.8558	9.45182	15.8461	9.44891	14.3181	5.72985	8.88033	4.65803	0	3.85912	0	4.1867	0	0
cra_locus_108536_iso_1_len_543_ver_3	Ribonuclease p/mrp subunit	5.99994	4.6329	3.36659	3.59131	4.78148	4.30624	4.62632	4.0114	8.39633	7.5785	3.57898	2.51291	2.6146	2.87048	3.33816	3.83016	3.79892	1.9843	13.9102	5.03808	4.48156	2.50023	2.85141
cra_locus_10853_iso_1_len_1568_ver_3	Cytochrome P450 71A4	0	0	0	0	3.79811	138.028	114.941	0	0	0	0	0	0	0	17.833	0	73.6418	23.9685	34.4209	9.92754	41.553	26.5927	435.212
cra_locus_108546_iso_1_len_317_ver_3	Gene of unknown function	10.5204	10.6006	34.1279	11.4837	7.8417	13.0226	0	13.8412	0	5.79665	62.8921	47.0908	3.68395	6.69254	0	0	17.7975	9.44379	10.7829	0	3.80873	0	0
cra_locus_108549_iso_1_len_279_ver_3	Gene of unknown function	0	12.4561	7.75232	4.92248	0	0	6.26381	5.22338	9.29538	7.91435	10.1885	5.90461	0	0	0	0	0	0	0	0	0	0	0
cra_locus_10854_iso_2_len_1395_ver_3	Conserved gene of unknown function	24.2798	22.8861	23.4609	30.7993	15.6577	17.2388	18.8515	18.8174	27.037	21.2742	23.7745	21.3426	15.4305	14.6716	17.4365	17.4693	14.652	16.8619	14.7508	14.5972	15.0966	12.5197	13.0764
cra_locus_108551_iso_1_len_335_ver_3	Gene of unknown function	0	5.18804	3.1668	3.26758	0	3.41576	3.6012	2.24603	0	2.82886	3.93076	0	0	3.23605	4.32777	4.48407	3.45648	4.44414	2.59617	0	0	0	0
cra_locus_108552_iso_1_len_408_ver_3	Gene of unknown function	3.56891	6.60536	6.75735	5.27641	3.15469	3.24452	2.29544	5.25892	2.18983	5.2541	5.97392	9.73715	2.61278	4.63007	3.02874	3.9352	9.23084	11.6615	5.90723	0	5.78847	0	0
cra_locus_108555_iso_1_len_424_ver_3	Bsu-protein phosphatase	34.6544	130.775	93.7498	123.257	19.6749	15.2542	17.4729	82.4744	90.9788	106.287	73.4405	97.6316	18.0859	11.9328	21.7836	43.6482	16.0661	15.0623	15.724	11.8006	8.0533	14.0149	12.2909
cra_locus_10855_iso_1_len_3041_ver_3	Sec15	19.2384	5.35181	4.02158	5.46466	8.24784	7.77731	13.479	5.27102	10.5534	11.1057	3.00679	4.16577	5.68297	6.89247	10.1333	10.9927	6.45587	5.9541	7.36114	7.43686	9.25021	7.05641	10.401
cra_locus_108561_iso_1_len_736_ver_3	Gene of unknown function	5.81607	8.11821	8.02801	9.24706	6.0129	6.26141	7.05494	4.86058	3.52169	5.33477	7.80592	6.26373	9.80441	4.85638	5.88964	7.17242	5.06344	3.00545	5.20969	5.49415	4.18907	2.09735	3.88692
cra_locus_10856_iso_1_len_784_ver_3	Non-LTR retrolelement reverse transcriptase	0	1.37484	3.02539	9.16853	0	0	0	0	1.20919	1.47411	5.71652	12.0976	0	0	32.0945	4.50395	0	0	1.33919	0	0	0	0
cra_locus_10857_iso_4_len_1815_ver_3	SET domain-containing protein	14.4501	20.1366	23.6796	29.6286	29.5299	24.8551	21.9198	12.4297	17.8443	13.6748	23.5317	17.4084	43.8807	37.4027	7.75942	14.7307	3.0977	3.09329	3.88196	3.11735	5.89607	3.70846	5.64176
cra_locus_108584_iso_1_len_402_ver_3	Kinesin heavy chain	15.2305	4.58354	2.9691	0	30.4516	27.8572	23.7901	5.15926	6.89767	5.13876	0	3.46282	27.6859	40.2914	10.9273	17.1136	21.3761	7.29172	23.4282	7.98394	0	7.95083	3.92929
cra_locus_10858_iso_1_len_1282_ver_3	Dof zinc finger protein	5.13844	0	0	0	8.05779	8.78337	3.3327	0	0	0	0	0	8.91909	8.06506	19.7868	11.8077	8.11654	2.98463	7.0895	6.71677	8.14151	6.70607	7.60301
cra_locus_108594_iso_1_len_316_ver_3	Gene of unknown function	0	22.977	25.3233	26.5312	0	0	0	44.6614	71.1381	96.624	10.6007	30.2174	0	0	0	0	0	0	0	0	0	0	0
cra_locus_10859_iso_1_len_1925_ver_3	UDP-glucosyltransferase family 1 protein	1.25559	0	0	0	3.46833	7.1666	5.23085	0	0	0.423946	0	0	0.858034	1.0302	4.49265	0.409045	9.3118	2.68969	10.018	12.9069	3.70267	10.0628	3.43023
cra_locus_1085_iso_7_len_2122_ver_3	Nucellin	21.6626	41.0465	37.7999	38.9163	22.9452	25.6451	15.5456	44.1006	50.677	55.7748	31.1005	27.55	13.146	8.03416	61.5742	52.4463	45.2476	57.8675	46.9279	52.3359	48.3733	56.536	45.8665
cra_locus_108609_iso_1_len_281_ver_3	Serine/threonine-protein kinase ATR	0	3.39218	4.39474	5.49384	3.16304	4.1477	2.76182	3.00006	8.23358	3.18969	0	4.0272	0	3.06719	5.27393	3.55105	6.45716	6.07101	0	0	0	0	0
cra_locus_10860_iso_1_len_2010_ver_3	DNA repair and recombination protein pif1, mitochondrial	16.6056	13.8701	14.0111	13.8608	15.5916	14.6183	14.1409	13.1837	9.59401	12.4536	13.715	13.0868	15.6031	19.5533	19.0607	16.6234	13.1014	17.9771	12.0307	12.157	10.2438	12.3756	8.32322
cra_locus_108610_iso_1_len_416_ver_3	Gene of unknown function	7.6893	17.5131	25.0398	27.2279	10.6415	10.6444	8.09277	14.2075	6.00477	9.90573	20.1108	25.5084	18.277	21.1073	5.93062	11.8699	5.88653	2.41585	6.15835	0	0	0	0
cra_locus_108613_iso_1_len_369_ver_3	Gene of unknown function	15.2766	23.1666	42.7518	31.8966	14.4569	15.3709	11.0879	32.7472	28.804	19.6404	27.0529	31.7481	7.90532	13.7304	12.8491	7.54493	14.3577	18.9987	17.2055	0	0	3.19826	5.38833
cra_locus_10861_iso_1_len_1927_ver_3	Conserved gene of unknown function	14.7662	12.3856	10.977	15.5611	8.25923	6.47878	7.60883	10.6461	22.7382	21.8591	10.5124	12.7841	21.9686	22.5832	10.5615	12.6356	10.9309	9.00096	11.986	8.52731	6.41505	8.22926	5.06753
cra_locus_108623_iso_1_len_631_ver_3	Abc transporter	1.52787	1.21713	1.26477	0	33.4326	7.45565	6.45495	1.71251	3.17089	3.69753	1.5279	2.45208	0	0	29.22	0	6.35204	9.17711	9.23753	6.66751	3.27981	21.8401	2.58676
cra_locus_108626_iso_1_len_449_ver_3	Gene of unknown function	4.50873	11.9211	19.2819	18.1297	0	0	0	5.56375	0	3.53319	29.9861	29.2155	1.8525	0	1.50123	0	0	0	0	0	0	0	3.27149
cra_locus_108629_iso_1_len_393_ver_3	Gene of unknown function	4.31054	4.19363	4.37361	4.85994	2.91973	3.37822	8.44479	0	0	2.03838	3.69318	4.56228	3.10909	2.26103	2.99752	5.40852	0	0	2.18249	3.91282	0	3.53055	0
cra_locus_10862_iso_5_len_2313_ver_3	Spermine/spermidine synthase	10.9441	13.9816	13.5464	16.2314	10.0043	11.0638	11.0715	11.2843	15.9884	13.1296	11.7716	12.7241	10.3434	10.6851	16.5265	14.601	11.7552	11.6848	11.2884	11.7914	15.8006	10.9503	13.275
cra_locus_108639_iso_1_len_959_ver_3	DNA polymerase I	7.67938	4.66151	0	1.98487	0.857081	0.661114	2.55691	0	1.33862	2.79236	0	1.48806	6.84501	0.936025	1.6532	4.42621	1.31226	1.27948	0	23.9466	22.4101	23.3851	8.66768
cra_locus_10863_iso_5_len_5883_ver_3	Callose synthase 3	11.9873	15.1657	10.476	9.88684	34.6189	31.9391	44.5241	15.4857	19.1537	18.0613	11.615	9.40877	18.5227	33.8895	22.775	42.1496	24.6694	9.81483	23.4032	22.9916	14.1096	25.1613	20.6941
cra_locus_108647_iso_1_len_499_ver_3	Conserved gene of unknown function	2.18721	5.06662	2.94541	4.90939	0	0	0	5.11809	8.29945	9.0773	2.55917	3.14075	0	0	0	0	0	0	0	0	0	0	0
cra_locus_10864_iso_1_len_2319_ver_3	E4/E8 binding protein-1	11.8605	21.5707	20.0397	21.5963	12.2985	12.9679	11.0425	22.3593	18.3748	22.5993	17.8583	18.9354	8.09246	12.3858	19.978	19.252	15.5259	17.1102	19.3955	18.3193	13.4121	17.3536	12.4002
cra_locus_10865_iso_1_len_1563_ver_3	Uncharacterized Cys-rich domain	25.0067	8.83648	2.70732	2.15599	6.88486	7.93595	11.7962	35.9773	5.35623	7.45679	13.0069	4.99188	4.51872	6.54747	8.48264	7.70027	19.8362	21.8303	20.7623	16.2059	5.57753	18.3662	4.41885
cra_locus_108663_iso_1_len_509_ver_3	MRNA, clone: RTFL01-06-G20	6.98853	8.52286	13.9876	9.61423	12.3161	13.8338	12.083	14.8912	13.8324	15.8442	16.6566	9.22595	13.1149	9.56962	21.9395	10.4401	5.93252	5.13506	8.27528	0	2.74229	0	3.24423
cra_locus_10866_iso_1_len_1448_ver_3	Zinc finger protein	19.4457	0	0	0	5.99171	2.2531	4.49598	0	0	0	0	0	0	0	1.6823	0	1.03205	0	0	0	0	1.60231	0
cra_locus_10867_iso_1_len_1993_ver_3	BZIP	2.31405	0.683963	0.563887	0.744075	13.7988	9.4542	28.5266	1.25979	1.39451	1.32225	0.864606	0.845556	6.98675	22.3472	10.1768	19.7745	5.96531	4.11122	4.89071	7.97705	1.95479	8.35539	3.07826
cra_locus_108687_iso_1_len_451_ver_3	Gene of unknown function	18.7187	0	0	0	87.6731	121.437	47.8279	0	0	0	0	0	0	0	0	0	0	0	0	0	0	0	0
cra_locus_10868_iso_3_len_2040_ver_3	Sodium channel modifier 1 (Predicted)	17.3264	17.7014	31.0118	35.5693	22.7248	21.7684	16.5256	14.9692	14.8573	13.4054	20.6526	25.095	19.9428	25.4654	32.5256	23.6435	20.9975	31.2758	21.7632	18.6717	17.4546	21.5309	16.9447
cra_locus_108693_iso_1_len_659_ver_3	Gene of unknown function	2.40465	6.59052	4.94408	5.49384	3.26847	5.36762	2.48564	1.74549	1.58085	2.15917	5.05383	7.0293	3.14364	3.8962	5.79967	3.03023	9.5566	5.12663	8.71233	0	0	2.3537	1.59939
cra_locus_108699_iso_1_len_307_ver_3	Gene of unknown function	3.30856	8.56587	20.1676	14.9401	5.01762	4.20212	3.1294	11.1251	7.76207	12.9	16.5431	18.5847	3.81646	4.16261	9.5433	5.36489	8.19455	8.25483	6.49466	0	0	4.97833	3.62453
cra_locus_10869_iso_1_len_2600_ver_3	Conserved gene of unknown function	19.2134	8.38348	8.37282	8.61578	16.7933	14.3964	21.1149	9.83747	16.7861	16.8105	10.6502	7.75109	16.2042	18.4316	14.0159	15.3379	16.7404	13.9177	15.7588	17.7272	13.7381	16.572	15.641
cra_locus_1086_iso_2_len_2796_ver_3	Oligopeptidase	2.63973	18.1832	12.7828	17.4842	5.4733	6.06614	8.531	21.1874	27.8648	36.3567	9.7168	12.937	3.1442	3.97724	4.75738	2.75973	6.70406	7.31066	6.68178	5.75565	5.43106	5.39471	8.17695
cra_locus_108705_iso_1_len_554_ver_3	Gene of unknown function	4.43143	4.41953	5.66921	8.05764	3.92217	3.86468	4.8608	3.14188	4.42637	6.35975	4.44737	7.0293	6.46691	6.34798	4.90131	7.49982	5.42401	5.99006	7.70354	3.45277	2.50723	2.25955	2.44271
cra_locus_10870_iso_3_len_1047_ver_3	Ubiquinol--cytochrome-c reductase	98.4302	56.9807	51.8109	42.7635	106.291	117.592	136.45	73.6571	46.715	62.5597	101.752	50.1174	41.2023	56.3041	82.6358	66.5142	128.274	138.512	109.892	97.9358	141.586	115.461	133.713
cra_locus_108712_iso_1_len_301_ver_3	Gene of unknown function	7.16092	2.69379	0	0	7.81456	4.29481	6.18363	0	0	0	0	0	4.42074	5.67487	2.75763	9.6505	5.38413	3.12478	6.10689	0	0	0	0
cra_locus_108716_iso_1_len_339_ver_3	2-isopropylmalate synthase B	12.1281	49.8262	65.6409	80.009	24.6401	25.6817	17.3981	39.6826	58.3575	40.3846	66.9825	75.143	15.6281	16.234	22.0048	32.4238	13.3844	15.0777	17.3549	13.7822	13.7991	21.0443	15.6581
cra_locus_10871_iso_8_len_1511_ver_3	Ocp3 putative	17.7793	23.8139	27.6495	19.8772	30.926	34.6416	37.0609	36.0339	16.8005	22.7798	21.3884	19.4853	29.4954	52.0989	18.3295	15.0553	18.446	22.0801	16.3739	14.1535	18.0599	14.875	15.9468
cra_locus_10872_iso_1_len_904_ver_3	Kinesin heavy chain	9.70646	3.80287	4.23185	2.50488	5.04794	2.7052	0.662679	4.90816	5.21635	7.94843	37.6356	11.8603	1.5357	1.95893	4.71878	0.783991	5.16023	4.37044	6.97279	3.32893	3.57266	2.42808	2.87854
cra_locus_108735_iso_1_len_282_ver_3	Gene of unknown function	0	20.7553	17.5095	17.3284	0	0	0	9.23626	4.26454	5.13221	13.144	17.5038	0	0	0	0	0	0	0	0	0	0	0
cra_locus_10873_iso_8_len_1680_ver_3	Conserved gene of unknown function	3.83419	2.84771	1.97045	3.54055	6.71882	5.25087	6.1476	1.33211	1.70915	1.49802	3.77124	4.24696	14.3948	14.9915	1.16991	4.29997	0.492794	0.926647	0.918615	1.09794	0	0.778388	0.721273
cra_locus_108745_iso_1_len_308_ver_3	Gene of unknown function	9.30834	7.44091	12.4045	7.71895	13.3324	13.0019	10.8097	5.41946	3.27218	4.43232	9.89029	11.2431	15.2111	14.8122	8.26823	20.5274	16.0388	12.7948	17.861	4.64081	0	0	7.22307
cra_locus_10874_iso_1_len_1005_ver_3	Conserved gene of unknown function	20.6773	37.9118	32.5519	31.4433	29.1965	24.8832	31.5543	56.0533	36.7353	36.9338	30.4473	29.4928	14.3493	23.964	29.5144	22.6161	30.7602	41.1037	38.5522	36.3496	24.7255	30.6897	19.4278
cra_locus_10875_iso_3_len_1190_ver_3	Phosphopentothenoylcysteine decarboxylase	14.5383	32.1308	31.4759	42.9574	11.556	13.3707	16.3841	25.6003	36.3107	34.3204	29.2494	28.5259	13.5542	12.9185	17.7592	20.5267	11.5963	11.8586	12.5955	11.4302	14.7847	11.3237	16.8042
cra_locus_108761_iso_1_len_290_ver_3	Gene of unknown function	0	4.91281	10.0776	7.66191	0	3.29797	0	7.89985	9.5396	3.5535	7.59043	0	2.98103	0	0	0	0	0	5.25744	0	0	0	0
cra_locus_10876_iso_3_len_859_ver_3	Gene of unknown function	110.165	15.6694	19.681	22.6108	201.432	162.006	53.3164	20.6186	5.79961	5.36364	4.77374	25.3436	141.975	111.311	40.7103	121.831	228.887	125.341	199.346	146.015	3.1718	154.357	9.71198
cra_locus_10877_iso_1_len_1629_ver_3	Conserved gene of unknown function	32.6319	0	0	0	0.954842	4.57284	0.833724	0.47251	0	1.08204	0	0	0	0.780327	4.5807	4.25061	3.10186	1.27491	3.15965	1.37571	8.84388	0.617846	8.24415
cra_locus_108786_iso_2_len_509_ver_3	Gene of unknown function	21.3589	64.6186	80.3903	76.9903	60.4017	58.9839	56.6056	78.6785	62.5013	63.3084	72.8145	112.147	31.8283	38.9041	42.148	44.4291	28.7289	58.9643	29.4143	32.6375	31.4185	27.3877	30.149
cra_locus_108788_iso_1_len_327_ver_3	Gene of unknown function	4.72055	45.692	39.0217	39.2312	3.34348	3.9201	3.114	50.5086	44.8393	34.4427	53.6588	55.7272	3.79768	0	2.70622	2.20213	9.82875	3.7078	0	0	0	14.2644	15.3694
cra_locus_10878_iso_5_len_2251_ver_3	Malate dehydrogenase	166.076	107.692	126.238	123.107	79.9206	99.2811	142.502	145.329	183.73	155.815	128.006	107.975	178.484	150.113	85.5947	321.995	82.9345	92.9885	70.6603	110.861	231.083	163.587	243.309
cra_locus_108793_iso_1_len_300_ver_3	Gene of unknown function	2.59543	0	0	0	3.67659	3.17627	0	0	0	0	0	0	3.13204	4.06872	2.76799	2.20139	3.30244	0	3.99745	0	0	0	4.39418
cra_locus_108798_iso_2_len_357_ver_3	Gene of unknown function	11.8766	22.8972	35.8747	36.581	14.1758	14.4337	7.4266	25.1446	29.6047	19.6049	27.3955	35.1599	12.0762	15.0782	21.5678	15.6419	20.8362	18.9164	12.9909	7.89504	6.01966	5.72638	5.58547
cra_locus_10879_iso_2_len_651_ver_3	RNA binding protein	159.792	64.0042	136.654	75.6773	130.605	113.478	70.12	105.303	83.5282	79.5253	172.675	140.614	68.23	88.7574	79.2189	59.5617	103.466	181.057	89.0567	135.932	118.862	145.74	112.072
cra_locus_1087_iso_7_len_1865_ver_3	DNA binding protein	23.8697	69.44	76.135	71.7364	23.1904	22.7047	12.9517	63.3007	34.8071	40.6144	30.1823	55.3758	10.0165	11.7035	25.8286	18.0987	41.0346	35.2154	36.071	43.4417	39.3718	39.4129	46.2998
cra_locus_108805_iso_1_len_330_ver_3	Ferritin heavy chain polypeptide 1	2.5165	3.04282	8.27846	3.32186	5.07557	7.14926	2.69759	5.93669	0	0	4.70124	4.90416	11.5145	0	0	4.75675	0	0	0	15.916	16.7635	21.0191	12.173
cra_locus_108807_iso_1_len_385_ver_3	Gene of unknown function	5.77522	6.00302	5.83291	9.29015	3.35851	4.31767	5.53915	2.89587	5.59513	5.73152	5.56489	5.18312	7.35134	4.47095	6.93848	5.36248	7.9989	3.81996	10.1434	3.63704	4.00559	3.3322	2.83039
cra_locus_10880_iso_2_len_1228_ver_3	Conserved gene of unknown function	0.87956	0.737387	0	0	25.2613	11.3575	14.4622	0.916602	1.86713	2.0614	0	0	14.7477	12.2592	17.7164	2.58661	24.8004	2.48073	31.138	36.2812	2.19479	33.6371	2.25294
cra_locus_108816_iso_1_len_361_ver_3	Gene of unknown function	10.7558	6.06914	4.58668	5.0967	4.00143	5.18536	6.28896	3.31222	5.9996	5.02842	5.32783	4.72413	11.2915	9.43271	8.48695	6.4689	9.55737	6.40016	6.30843	3.89996	5.28634	7.44393	8.27726
cra_locus_10881_iso_1_len_2445_ver_3	Malic enzyme	33.7483	22.6698	16.7026	13.1161	46.5461	50.4898	48.6359	37.6358	29.8863	24.415	12.622	10.2723	25.4119	28.2802	27.8841	32.5944	47.1121	41.4065	39.3387	48.9297	37.5021	69.0269	41.9715
cra_locus_108822_iso_1_len_360_ver_3	Gene of unknown function	2.61533	6.08748	10.6649	7.90051	2.20744	0	0	6.43682	8.52511	12.3288	6.19896	12.2641	0	0	1.73734	1.80235	0	0	2.40008	0	0	0	0
cra_locus_10882_iso_3_len_1346_ver_3	Histone H3	60.3491	44.2297	39.4701	39.5373	61.2541	52.7536	75.8777	49.2112	51.2335	51.5023	38.4659	40.5606	49.5444	32.3364	52.4069	57.4833	43.1203	55.7593	43.4311	87.9905	74.6269	82.1167	77.4823
cra_locus_10883_iso_1_len_1188_ver_3	Triose phosphate/phosphate translocator, chloroplast	2.98678	3.52887	2.92493	3.54904	6.2747	4.16351	2.52657	3.55673	3.50849	4.21364	1.70874	2.46655	1.09778	1.68679	6.67197	2.10967	5.05247	3.18768	4.45471	3.85407	1.37176	3.75252	0.592106
cra_locus_108841_iso_2_len_330_ver_3	Gene of unknown function	2.01422	21.0969	29.6645	32.1965	0	2.45117	0	11.4167	11.3049	9.86008	42.0761	44.7505	0	0	0	0	0	0	0	0	0	0	0
cra_locus_10884_iso_3_len_905_ver_3	21kD protein	201.04	223.884	148.864	77.265	278.358	193.294	95.2733	301.669	33.9178	16.2341	9.28843	46.1298	272.43	319.154	404.525	716.913	147.303	118.856	108.166	71.5385	14.2749	91.2945	46.6374
cra_locus_108853_iso_1_len_513_ver_3	Multidrug/pheromone exporter, MDR family, ABC transporter family	1.34144	6.18162	2.86021	6.67434	0	2.41361	0	5.11205	9.08824	7.15399	4.53174	6.67166	0	1.46865	2.0101	2.71171	2.18529	2.63412	4.6257	4.54781	2.94626	2.04247	2.83889
cra_locus_108858_iso_1_len_296_ver_3	Gene of unknown function	4.25543	6.86059	11.1473	6.9136	12.1901	10.1321	7.16832	3.60375	9.01438	6.25256	3.70993	7.60191	9.53687	8.8813	5.40433	12.289	3.96136	5.09328	0	0	0	4.07269	0
cra_locus_10885_iso_1_len_1981_ver_3	Taz protein	8.31527	12.4183	10.8861	14.579	16.0955	14.426	18.1244	9.7882	15.9016	9.5027	5.11079	8.22395	15.9436	11.0896	12.4794	20.5684	11.9623	10.7984	10.5815	11.2763	6.68714	10.8376	8.16531
cra_locus_10886_iso_2_len_1261_ver_3	NC domain-containing protein	84.5657	37.3195	59.5537	62.1179	80.3022	74.5691	68.8825	30.6267	33.4134	47.126	40.5455	63.054	51.7976	39.6924	45.5592	74.8725	34.9347	58.8474	36.2276	56.752	60.0542	66.8397	68.8652
cra_locus_108877_iso_1_len_488_ver_3	COP1 homolog	14.7344	43.3667	67.2567	36.0272	4.77557	6.29571	3.2853	42.9741	45.9272	45.2618	124.243	94.4705	6.62629	8.70114	1.37227	2.07957	0	2.40724	0	0	0	0	0
cra_locus_108879_iso_1_len_307_ver_3	Gene of unknown function	2.53008	7.24804	3.98372	7.74672	0	0	2.92077	0	0	3.11379	3.56313	4.97803	0	2.57685	0	2.78975	5.56059	0	0	0	0	0	0
cra_locus_108891_iso_1_len_299_ver_3	Gene of unknown function	4.80931	4.52291	0	3.70326	4.42825	4.32662	8.37752	0	5.22558	3.89306	0	0	6.0253	8.78075	6.62551	8.61721	11.752	3.77752	6.6871	0	4.06265	4.02744	0
cra_locus_108898_iso_1_len_443_ver_3	Gene of unknown function	6.79576	6.63688	2.17349	6.50238	4.33199	3.56427	5.88388	2.32416	6.6155	4.1818	4.95617	3.56559	6.15059	4.76309	2.76955	6.05222	4.32349	2.8742	4.88449	4.06576	9.80335	2.38781	7.08032
cra_locus_108899_iso_1_len_507_ver_3	Gene of unknown function	7.92328	8.94173	7.09548	9.97627	3.75197	4.37331	6.9161	4.31351	6.94515	10.7363	6.80893	9.26456	4.14329	3.8898	3.11326	6.73956	6.63818	4.26749	7.25228	2.70876	3.21272	3.51578	4.79088
cra_locus_1088_iso_6_len_3062_ver_3	Methionyl-tRNA synthetase (AtcpMetRS)	14.6634	5.63686	5.43148	5.6297	16.9947	12.6089	16.8851	3.55767	6.1295	4.9742	5.85531	5.96204	25.6995	19.5868	11.7091	10.6609	3.88962	10.0603	5.19093	4.61052	5.13557	4.30231	4.28864
cra_locus_108909_iso_3_len_432_ver_3	Gene of unknown function	4.43041	73.9378	102.194	63.1724	15.3286	8.39106	7.05189	128.419	132.626	136.243	71.807	124.539	2.98372	2.03947	0	5.18118	10.7	14.1305	5.91385	6.10446	0	3.92478	5.22789
cra_locus_10890_iso_3_len_4305_ver_3	Spliceosomal protein sap	49.3218	90.0467	77.2946	79.504	45.1731	44.8186	42.2508	82.1658	75.2307	85.4874	74.8076	81.8598	41.6352	51.3392	56.9557	45.0641	37.9782	44.4848	37.1406	44.391	41.7115	45.0814	43.2302
cra_locus_108910_iso_1_len_328_ver_3	Gene of unknown function	6.87618	4.90108	2.77795	3.60132	3.99876	3.90698	3.10358	6.66599	12.4908	10.1328	3.31288	4.93696	0	2.76092	5.00875	6.58429	3.26529	0	0	0	0	3.3062	0
cra_locus_10891_iso_1_len_1596_ver_3	UDP-glucosyltransferase	36.6338	2.22105	3.04785	1.12892	8.81694	14.8314	3.18305	6.97374	14.3532	3.43286	1.85124	2.53169	18.281	18.7078	5.9103	2.7792	41.7445	112.494	58.0715	21.3181	32.2004	4.28983	3.68277
cra_locus_108920_iso_1_len_359_ver_3	Ataxia telangiectasia mutated	1.80349	11.2867	6.50222	6.99217	3.8244	5.03048	2.28478	7.08113	4.27547	8.61885	5.78893	13.14	0	1.83155	4.53099	2.71171	6.90329	2.83314	4.81471	0	0	0	0
cra_locus_10892_iso_7_len_2420_ver_3	SNF2 domain-containing protein / helicase domain-containing protein / RING finger domain-containing protein	8.64403	26.4181	26.7489	34.0016	8.77872	11.3659	8.87802	15.1341	23.083	22.3299	29.3549	24.5408	10.5905	9.77498	12.8182	11.233	8.43887	12.4489	9.03136	3.46576	3.9184	3.02667	4.5207
cra_locus_108932_iso_1_len_436_ver_3	Gene of unknown function	5.58329	8.25125	7.48293	9.44887	0	2.41705	5.13006	4.5594	3.05876	6.22867	10.7782	10.654	0	0	0	2.19868	0	0	0	0	2.96464	0	2.70079
cra_locus_10893_iso_2_len_5721_ver_3	GYF domain-containing protein	22.3567	32.0529	29.4526	30.025	22.8259	22.5649	21.8665	30.0054	25.8665	31.2956	29.5718	30.9747	22.5542	25.0635	26.7302	27.4811	23.1416	23.7273	22.4452	19.0397	16.7659	20.1115	16.6885
cra_locus_10894_iso_1_len_1764_ver_3	Glucosyltransferase	20.301	0	0	0	1.03368	6.80395	19.9567	0	0	0.926573	3.22163	0.850808	0.774585	1.47015	0	0.825235	0	0	0	0	0	0	0
cra_locus_108951_iso_1_len_468_ver_3	Gene of unknown function	7.64121	8.90158	18.9204	8.93532	14.5255	17.0866	5.28457	20.0393	9.45268	7.32393	10.6372	19.7549	7.57265	15.8352	18.6616	6.79472	13.3438	10.0676	13.3255	0	0	4.05329	2.29526
cra_locus_108956_iso_1_len_308_ver_3	Gene of unknown function	8.33872	0	6.69843	0	4.76156	3.74631	0	4.43411	18.7407	22.6048	3.55036	4.29883	0	0	0	0	0	0	0	0	0	0	0
cra_locus_10895_iso_2_len_1804_ver_3	Gene of unknown function	7.22412	28.2765	38.2157	23.5291	15.4926	16.1416	11.665	40.6951	21.1811	22.2591	30.7728	32.1739	5.85779	17.7017	13.8554	7.36057	20.8557	23.0322	28.929	9.99357	8.28094	10.0248	6.55403
cra_locus_108965_iso_1_len_283_ver_3	Gene of unknown function	0	0	0	0	0	0	2.51173	0	0	0	0	0	0	0	0	0	0	0	0	12.2342	16.4105	22.1841	11.901
cra_locus_108969_iso_1_len_289_ver_3	Ataxia telangiectasia mutated	0	7.28014	7.45415	8.28303	2.81024	4.49303	0	9.78062	5.10735	4.04279	6.25897	6.74204	0	0	2.44318	4.8185	4.06801	3.92281	6.66652	0	0	3.80213	0
cra_locus_10896_iso_1_len_1442_ver_3	Activating signal cointegrator	12.4445	7.13006	7.69079	6.64082	16.1241	15.36	12.6422	10.6522	11.0424	10.9834	5.85858	6.46404	10.7124	14.2587	9.815	13.2573	14.7404	14.2559	13.3912	15.3945	8.77221	12.5231	10.2428
cra_locus_10897_iso_7_len_1274_ver_3	Gene of unknown function	5.30183	9.31828	12.8983	11.8614	6.40229	5.23475	3.68021	13.8009	12.2659	12.0682	10.1726	12.0049	6.19258	7.98617	9.82019	6.61265	15.2918	9.48931	16.5324	13.2079	6.78413	10.1634	8.90265
cra_locus_108981_iso_1_len_736_ver_3	Gene of unknown function	5.20385	9.93185	11.1609	9.13828	5.07339	7.04409	4.92205	5.92991	5.04776	9.79499	13.4102	11.353	3.80171	9.4815	8.63277	4.89412	11.853	9.49722	16.1398	3.66276	7.44723	6.85136	8.29209
cra_locus_108996_iso_1_len_388_ver_3	Gene of unknown function	4.67199	1.70082	3.4705	2.99942	3.88551	5.6517	2.42332	0	0	0	3.54754	3.08388	3.94049	2.44583	2.55988	4.98532	5.89238	5.91881	3.41992	0	3.36102	2.75363	2.80674
cra_locus_108997_iso_1_len_571_ver_3	Gene of unknown function	0	168.814	127.004	141.198	0	0	0	106.77	126.865	166.384	117.814	163.582	0	0	0	0	0	0	4.06392	2.6278	2.42859	0	0
cra_locus_10899_iso_8_len_825_ver_3	Conserved gene of unknown function	24.9453	13.654	14.1739	13.3343	31.4595	33.9859	42.9158	15.4553	23.251	20.0407	9.68862	10.895	32.7001	31.4696	26.9225	20.8352	31.6855	20.5011	29.85	24.7246	20.8083	19.9946	21.5195
cra_locus_1089_iso_6_len_2415_ver_3	Pentatricopeptide repeat-containing protein	17.1883	13.7678	11.6619	10.7344	19.5986	16.1568	22.0957	12.5302	17.1485	15.2115	10.4974	10.6334	24.2196	22.591	6.75557	11.2764	5.66043	3.84718	6.50773	7.48871	7.21776	7.58195	7.33274
cra_locus_108_iso_4_len_2217_ver_3	Isoform 2 of TSL-kinase interacting protein 1	4.69831	15.8509	15.6909	18.8066	5.1609	4.21505	7.71365	10.2402	23.0625	17.1533	14.1313	15.3906	12.4783	12.0226	6.82347	7.79803	4.98276	5.63261	6.56852	6.98286	5.96585	4.24698	5.48438
cra_locus_10900_iso_3_len_2007_ver_3	Diphenol oxidase	3.11827	0	0	0	18.8223	12.4179	4.88195	0.364797	0	0.969038	0	0	4.09439	5.12889	66.9629	57.667	8.55557	0.966768	4.07095	3.14205	1.49731	4.40829	6.06664
cra_locus_109018_iso_1_len_371_ver_3	Gene of unknown function	4.11322	4.999	5.46451	7.8713	0	0	0	0	5.09615	1.98871	5.17205	6.74412	3.10227	3.37209	5.0419	2.791	0	0	0	0	0	2.89051	0
cra_locus_10901_iso_1_len_1778_ver_3	Proteasome-activating nucleotidase	11.6005	22.4477	26.1197	20.141	29.0533	26.1543	22.0851	27.5858	26.8107	23.4031	39.2806	40.0899	9.13973	20.6961	16.1079	11.3244	16.2348	22.0139	16.7235	16.4347	18.8777	17.9737	14.298
cra_locus_109022_iso_1_len_262_ver_3	Gene of unknown function	10.6816	4.19291	4.45604	0	7.69718	7.65247	5.97406	5.60448	0	4.51127	6.6806	6.33542	4.24998	5.93355	4.71978	4.3527	10.1264	11.3082	4.6494	0	0	6.36408	0
cra_locus_10902_iso_1_len_1719_ver_3	Cystathionine gamma-synthase	23.4347	32.6252	92.9312	53.339	6.79959	15.2436	7.20688	22.2046	103.62	29.013	460.024	97.3911	3.68308	6.77629	7.69731	6.21287	8.9063	1.65965	4.10248	7.89131	6.81515	9.1836	48.2941
cra_locus_10904_iso_1_len_1397_ver_3	NAC transcription factor	0	1.24975	1.31553	1.29314	0	0.449442	0.508756	2.21057	4.67147	3.25426	1.13785	1.21394	0	0.674936	1.45437	1.00302	1.66527	1.05621	1.16144	1.13578	0	0.867152	0
cra_locus_10905_iso_1_len_901_ver_3	Gene of unknown function	4.40531	11.6233	10.6758	9.83442	20.3385	19.1079	26.0393	8.78803	7.28094	7.79977	10.8318	10.0507	6.1647	10.1737	3.65824	8.99645	11.9428	26.7069	2.50169	0	1.50952	5.21485	5.46248
cra_locus_109067_iso_1_len_580_ver_3	Pentatricopeptide repeat-containing protein	2.65123	2.77038	3.51739	2.23343	6.02757	5.13293	4.52618	4.11624	3.0125	4.37642	4.23751	5.19065	2.5674	6.93769	9.33583	4.76395	5.46339	6.17017	4.45645	4.69977	3.78247	7.17643	2.99243
cra_locus_10906_iso_3_len_4746_ver_3	PHD finger family protein	36.1883	28.8792	22.9061	23.1459	28.8677	28.4673	30.7389	28.1938	28.5387	39.7044	28.4694	26.1894	27.411	25.2999	28.4629	33.9898	27.1488	27.01	28.4779	34.0235	26.4404	30.0527	31.0712
cra_locus_109078_iso_1_len_386_ver_3	Gene of unknown function	0	35.062	39.5527	29.7314	0	0	0	77.0069	57.1895	85.7319	33.2958	87.0909	0	0	0	0	0	0	0	0	0	0	0
cra_locus_10907_iso_6_len_2214_ver_3	Triose phosphate/phosphate translocator, non-green plastid, chloroplast	35.2114	6.65085	5.63874	5.13932	28.0287	28.0827	23.4647	9.15334	8.43239	8.23469	6.8325	5.27801	18.8402	26.8087	31.878	27.6582	30.3472	21.3166	34.3089	35.4363	21.6873	33.0724	20.3746
cra_locus_109080_iso_1_len_339_ver_3	Gene of unknown function	0	14.9694	29.6964	12.4055	0	0	0	44.5628	8.03172	15.5575	36.2898	34.5229	0	0	0	0	0	0	0	0	0	0	0
cra_locus_109089_iso_1_len_420_ver_3	PT5	1.93725	4.21637	4.0716	9.63882	1.8687	2.51595	3.41166	3.16398	14.8583	10.1207	4.16198	8.9664	0	3.64498	2.34766	4.57731	0	0	2.4012	5.62951	0	2.52827	2.57703
cra_locus_10908_iso_2_len_996_ver_3	Got1-like family protein	26.9684	26.6463	16.9643	28.7134	17.3787	17.4214	25.0706	24.4495	31.8417	36.7021	22.17	20.2265	22.09	19.5755	42.9785	32.3274	31.2147	26.8079	28.9032	20.0846	23.7079	16.97	27.1868
cra_locus_109097_iso_1_len_287_ver_3	Gene of unknown function	2.30679	0	3.2194	0	2.83202	3.09801	0	2.6639	0	0	0	0	2.74154	2.35278	0	0	3.46885	3.62378	5.03865	0	0	0	0
cra_locus_10909_iso_3_len_1450_ver_3	Gene of unknown function	2.85563	8.16415	8.6217	10.1758	2.29047	2.20666	1.95912	7.49679	7.65115	7.78869	7.86705	11.0374	2.19015	3.05729	4.87978	2.98078	3.0918	5.44297	4.21838	2.55131	1.31228	1.53048	1.03141
cra_locus_1090_iso_18_len_4283_ver_3	Photosystem II CP43 chlorophyll apoprotein	2.73449	7.2054	1.52948	4.24888	16.2936	12.0684	5.6853	1.68025	7.20883	1.30813	0.781716	1.45308	16.8267	3.99901	0.706468	13.3157	2.04644	0.679314	1.46003	1.43054	1.26349	0.697146	0.645992
cra_locus_10910_iso_1_len_619_ver_3	Hypoxia-responsive family protein	103.808	68.0966	59.0106	43.4107	67.5496	79.3034	105.97	49.5079	40.2312	52.7135	75.4305	47.3807	52.2696	35.6135	40.6627	56.2197	46.4718	61.9449	41.8635	56.6195	106.531	60.9887	104.022
cra_locus_109113_iso_2_len_293_ver_3	Gene of unknown function	3.8939	0	0	0	0	13.5078	0	0	0	0	0	0	33.2225	26.3257	24.9292	42.7094	0	0	0	0	0	0	0
cra_locus_10911_iso_3_len_952_ver_3	Conserved gene of unknown function	12.134	53.3855	130.035	109.579	40.5883	22.5151	7.60323	21.9664	5.03542	5.62708	64.736	148.235	59.7734	46.9223	49.5423	35.0965	6.61107	29.5592	11.4239	14.3086	8.31897	36.6287	5.75612
cra_locus_109131_iso_1_len_402_ver_3	Gene of unknown function	5.36696	15.0602	9.83514	16.2901	3.73968	4.45056	4.50924	6.63333	15.7979	18.5658	13.2782	18.5508	2.46518	0	1.53906	4.15844	3.92623	0	5.22777	0	0	0	0
cra_locus_109135_iso_1_len_357_ver_3	Gene of unknown function	4.61869	4.28159	2.95439	2.81392	4.86028	5.81095	4.77424	3.14308	0	0	4.31424	0	5.1755	5.86374	4.90974	6.00214	4.96099	3.6278	8.8074	0	0	3.01388	0
cra_locus_10913_iso_8_len_2171_ver_3	Arginine decarboxylase	5.70853	5.78666	4.23317	4.84751	10.2644	41.8789	12.8614	5.45466	7.55552	7.07216	3.17103	3.74724	15.5861	13.902	3.23339	5.84879	2.24101	4.9203	3.00077	4.41267	4.09679	2.5383	4.66134
cra_locus_10914_iso_1_len_1751_ver_3	UDP-glucose 6-dehydrogenase	43.7991	29.6786	33.2821	37.5636	23.4528	44.8809	34.8932	38.9542	63.7641	80.4663	59.8242	52.1035	8.58475	10.9678	44.8613	34.0381	33.2622	35.4389	23.5703	34.8886	63.8912	41.7925	52.4502
cra_locus_109150_iso_1_len_340_ver_3	Gene of unknown function	2.95749	5.30097	2.89332	5.68816	0	0	4.47575	2.8729	4.53668	3.97626	4.09506	8.89963	2.27433	2.65264	2.59125	2.49373	0	0	2.32221	0	0	0	0
cra_locus_10915_iso_1_len_1828_ver_3	Late embryogenesis abundant proteins	9.59382	19.1086	28.818	16.8021	5.09532	6.52772	10.7679	7.44974	2.39895	1.78722	9.28174	24.6675	0	1.0859	0	5.30585	0	1.84256	0	0	0	0	0
cra_locus_10916_iso_1_len_996_ver_3	Glutathione s-transferase	0	0	0	0	11.2653	18.6295	9.53642	0	0	0	0	0	0	0	24.1975	0	55.1937	7.03157	97.1656	66.4131	31.9886	52.0345	39.0278
cra_locus_10918_iso_5_len_2663_ver_3	Cytosolic purine 5-nucleotidase	10.6813	14.326	13.1917	15.0674	24.1839	21.2181	26.2908	15.0556	14.7147	12.4413	7.30637	8.47639	17.1593	23.3828	15.5758	17.0774	14.5794	17.6506	14.5593	15.4844	13.9925	15.2749	12.7978
cra_locus_10919_iso_3_len_1943_ver_3	Protein TIFY 8	6.64295	4.5938	3.07391	4.42033	16.4498	18.3744	16.848	4.63218	6.85116	5.84712	2.99428	7.8088	9.34961	12.5293	28.7489	21.6625	16.1105	14.743	15.1309	15.2209	6.99183	16.7341	11.869
cra_locus_1091_iso_3_len_3446_ver_3	ATEXO70D2	20.7583	15.4033	13.2074	18.9077	23.7353	27.8898	17.0243	9.21209	23.9729	19.6874	10.7673	12.5281	14.8254	11.3874	35.4731	23.8142	22.9294	12.9344	41.7219	48.6161	28.0569	29.4512	15.4948
cra_locus_10920_iso_3_len_4636_ver_3	Xanthine dehydrogenase	55.1617	33.2135	23.1525	25.0425	30.8978	43.4002	32.2912	40.1004	32.8411	45.5511	25.8165	28.4569	22.2313	18.7435	31.1247	29.8482	16.4239	23.1165	21.4922	21.3034	27.3098	18.0888	26.4645
cra_locus_109218_iso_1_len_638_ver_3	PT4	2.22105	4.81255	4.7736	9.34585	3.81746	2.52396	3.5237	4.85276	12.5378	7.61464	6.50608	11.665	2.67132	3.94208	4.50099	3.9184	3.07272	4.32647	2.49037	2.3387	0	1.62324	1.95537
cra_locus_10921_iso_1_len_877_ver_3	Conserved gene of unknown function	19.8742	45.3624	41.1784	30.5205	24.5949	22.9833	19.6629	55.9627	36.1139	34.3055	40.3816	38.4044	8.67466	12.9025	18.2071	23.8488	17.9412	15.2348	15.2445	10.3062	10.0895	15.5044	11.7743
cra_locus_109223_iso_1_len_333_ver_3	Gene of unknown function	6.40714	7.83278	10.7008	6.07214	10.7059	8.29172	5.91429	9.94703	8.73626	8.94921	9.30913	13.6568	7.21278	8.50621	9.28171	7.84922	11.7758	12.3018	6.17677	5.111	5.41241	7.154	5.42307
cra_locus_10922_iso_3_len_1156_ver_3	Shikimate kinase	24.4359	18.4749	18.6708	20.2692	46.3257	37.4248	42.1478	19.1489	39.3248	33.6312	17.8297	20.875	43.87	36.9923	13.6293	18.6331	9.67371	13.6503	11.2785	12.1781	13.1396	7.80668	10.1599
cra_locus_109241_iso_1_len_389_ver_3	Gene of unknown function	9.01745	5.08827	5.7681	7.90503	4.24374	5.12363	6.60535	6.87287	14.9851	12.7097	7.66498	6.91946	5.10841	5.94491	3.35038	4.47432	6.55402	11.3326	7.22207	7.19326	9.14096	0	7.37902
cra_locus_10924_iso_2_len_1091_ver_3	AP1	7.10425	0	0	0	0	0	0	0	0	0	0.632839	0	0	1.12631	0	10.308	0	0	0.816053	0	0	0	0
cra_locus_109250_iso_1_len_748_ver_3	Gene of unknown function	4.0635	6.53903	7.22015	8.023	3.41819	4.61768	3.62993	5.54418	9.92702	11.1794	3.64101	5.26097	4.13176	4.24423	4.52147	5.55919	2.94209	2.0096	4.41962	1.80082	0	0	0
cra_locus_109253_iso_1_len_259_ver_3	Gene of unknown function	11.5267	9.5571	40.0256	11.0355	16.1727	16.5738	5.29549	23.0092	6.13438	6.18309	42.7598	55.7568	8.91836	18.038	23.1584	8.04081	16.6258	40.2798	17.2702	0	0	0	0
cra_locus_10925_iso_5_len_2132_ver_3	RNA methyltransferase	1.10628	2.99054	1.87607	2.12126	2.62158	2.45584	3.47493	2.71254	5.52507	4.82181	1.48034	1.31611	0.941745	1.90869	0.836873	1.44676	1.70226	2.18245	1.33933	2.70902	2.29502	2.02129	1.91654
cra_locus_109269_iso_1_len_282_ver_3	Gene of unknown function	7.37563	4.34127	5.332	6.68744	7.74164	7.77254	3.55243	7.19659	5.73878	4.64285	9.64523	10.0234	4.61195	12.2182	3.76794	5.89278	8.19767	5.37433	9.56112	0	0	0	0
cra_locus_10926_iso_7_len_1688_ver_3	UDP-glucose:flavonoid glucoside 1,6-glucosyltransferase	26.449	11.5199	18.8584	14.9748	26.6256	36.0599	20.6086	21.3145	12.0064	11.3673	12.7092	15.1819	15.7963	18.845	24.278	20.2814	48.8456	44.367	45.4046	21.6738	27.8361	30.4491	26.1167
cra_locus_109272_iso_1_len_1711_ver_3	Gene of unknown function	0	125.458	125.389	115.051	0	0	0	105.3	100.659	130.609	124.976	142.284	0	0	0	0	0	0	1.20225	1.38562	0.913009	0	0
cra_locus_109274_iso_1_len_283_ver_3	Non-LTR retrotransposon transposase	0	2.88469	4.08763	4.54215	0	0	0	2.97644	5.8815	7.30286	0	5.08517	0	0	0	0	0	0	0	0	0	0	0
cra_locus_109279_iso_1_len_434_ver_3	C2 domain-containing protein	4.9429	11.3073	6.15264	9.87535	0	0	0	11.5396	19.6728	15.7249	6.98801	11.6179	0	0	0	0	0	0	0	0	0	0	0
cra_locus_10927_iso_1_len_4181_ver_3	DNA polymerase V	19.5204	41.5885	36.3923	43.8475	32.8919	30.8899	30.6195	34.9437	42.9165	38.3465	25.6635	34.7306	23.1514	27.1287	28.7899	32.8462	25.2977	20.4911	28.596	28.534	25.098	26.6662	24.4006
cra_locus_109289_iso_1_len_351_ver_3	Gene of unknown function	11.2578	33.9429	66.2077	65.4484	0	0	0	60.8313	9.02114	22.0825	19.1167	150.423	0	0	0	0	0	4.22331	0	0	0	0	0
cra_locus_10928_iso_1_len_1303_ver_3	Thioredoxin family Trp26	10.5942	34.5991	28.6566	25.2931	13.1895	12.5222	14.2017	27.3747	20.8109	20.7453	24.8772	23.0258	9.02106	8.71943	12.0943	13.1337	17.4011	12.4079	20.8887	13.2618	10.4602	16.4106	11.2872
cra_locus_109297_iso_1_len_341_ver_3	Gene of unknown function	4.50873	0	0	0	0	4.13832	5.57675	0	0	0	0	0	6.34773	3.70161	4.05871	4.20663	3.65078	0	6.48134	0	0	0	0
cra_locus_109298_iso_3_len_623_ver_3	Gene of unknown function	1.36628	16.0358	4.77761	1.6833	74.4751	41.0926	3.4174	13.6532	2.23554	1.3532	4.88367	6.83404	22.5056	18.5586	2.21165	1.90824	18.9019	20.6046	9.48352	8.1739	3.32398	21.4686	7.40215
cra_locus_10929_iso_4_len_1221_ver_3	Gene of unknown function	40.2608	18.4407	17.0139	14.9698	44.0782	51.6834	73.3736	23.6976	25.901	31.1748	23.9209	14.3188	35.3659	27.2621	44.5179	36.4852	58.4947	43.3527	87.6706	40.7337	59.815	40.471	48.7979
cra_locus_1092_iso_3_len_936_ver_3	DVL10	55.4767	51.4998	99.3613	122.197	33.9076	95.0386	29.4787	64.7125	138.904	109.959	79.3345	112.603	23.3173	21.1176	157.731	16.8383	60.5492	118.073	128.198	412.276	270.54	103.542	291.368
cra_locus_10930_iso_3_len_3028_ver_3	DNA repair protein RAD50	17.8605	29.7254	34.2739	38.4954	17.7632	21.5264	19.9194	26.2402	31.078	30.4928	24.6069	32.9784	15.4011	19.3032	18.9737	18.7785	32.0124	22.0775	29.8852	24.0479	19.6413	25.2824	20.6478
cra_locus_109311_iso_1_len_391_ver_3	Gene of unknown function	5.53004	4.72282	4.01536	4.24938	5.50473	4.24611	6.08821	5.12617	11.6926	9.7358	3.12723	0	5.27558	5.60845	3.33161	4.4496	3.59603	2.3479	5.78563	0	3.03015	3.27697	0
cra_locus_10931_iso_2_len_2618_ver_3	DNA repair protein XRCC3 homolog	1.52555	3.89138	4.59844	4.15911	4.3872	3.06349	4.41315	5.04382	4.61615	4.72867	4.50921	5.48782	2.07633	5.50773	5.2166	2.90338	3.80247	6.33599	4.99324	4.85108	3.85551	4.27648	3.00739
cra_locus_109322_iso_1_len_279_ver_3	Gene of unknown function	0	0	0	0	5.3139	3.44308	3.01591	6.87287	0	0	0	0	2.82927	2.87135	19.6497	5.24987	13.0176	7.81946	21.0884	0	0	0	0
cra_locus_10932_iso_5_len_1539_ver_3	Chitinase	11.5017	28.3461	34.1502	22.9213	26.5695	22.3947	27.3475	27.4915	20.941	23.0535	65.6462	29.8163	28.8548	42.1046	10.763	9.04741	6.73512	8.49941	6.88727	6.08807	6.97376	4.32083	4.24643
cra_locus_10933_iso_4_len_467_ver_3	SAUR family protein	14.4526	0	0	0	0	0	0	0	0	0	0	0	8.55887	3.62426	0	2.31548	0	0	0	0	0	0	0
cra_locus_109342_iso_1_len_521_ver_3	Breast cancer type 2 susceptibility protein brca2	5.05857	3.35081	2.95439	3.75189	6.07534	5.12363	5.06895	6.14647	10.29	8.16872	2.73236	3.56287	3.45033	6.44478	5.11714	6.06277	3.63806	2.24578	4.55049	3.94752	0	3.81758	0
cra_locus_10934_iso_1_len_1438_ver_3	DNA binding protein	2.22716	0	0	0	7.63708	7.46181	4.56906	0	0.76574	0	0	0	3.1626	5.16472	15.6519	1.90532	8.60374	2.77483	7.22719	4.50281	4.82674	7.43695	5.20095
cra_locus_109350_iso_1_len_408_ver_3	Gene of unknown function	7.85161	18.205	24.6552	34.9055	11.7425	11.0314	7.03936	13.238	21.4603	20.7191	11.0144	16.7966	16.7965	9.54952	9.08621	9.75929	13.5243	3.13963	10.29	5.46612	6.07789	5.21664	5.80063
cra_locus_109353_iso_1_len_508_ver_3	Pentatricopeptide repeat-containing protein	5.76063	8.66812	7.94769	14.1303	4.57617	5.00597	3.14813	5.16541	10.9158	9.42308	7.53327	8.86	2.95331	4.22408	6.0939	7.59732	4.0765	3.01649	4.82476	3.78435	2.51901	2.27016	0
cra_locus_10935_iso_1_len_753_ver_3	Conserved gene of unknown function	28.4722	42.7584	54.0161	48.018	21.6519	10.1907	11.5356	62.2735	233.967	145.61	27.9496	39.6308	18.8553	13.6978	126.036	26.6976	39.6687	48.4842	132.072	39.5232	27.1199	138.998	18.4722
cra_locus_109363_iso_2_len_446_ver_3	Helicase domain-containing protein	27.247	12.5926	34.5256	19.6432	26.7607	32.5848	10.9877	34.7764	18.7086	19.7206	30.3715	30.7532	10.8557	30.866	32.7177	12.3035	37.4608	53.1978	38.7948	13.3515	16.5721	15.4091	10.1047
cra_locus_10936_iso_1_len_3811_ver_3	ATP binding protein	9.87103	2.24411	1.61055	1.3829	31.6488	27.084	22.4202	8.8137	6.89061	6.85012	3.21777	1.48806	76.9596	69.6876	8.3674	29.0559	44.6599	14.8773	40.9225	39.2681	20.5925	41.4816	24.0751
cra_locus_10937_iso_3_len_1938_ver_3	Serine/threonine-protein kinase PBS1	5.38496	3.67827	3.29951	4.19017	8.4204	6.37703	6.07629	3.13221	2.56505	2.3968	2.5203	2.85139	9.29999	9.00952	8.06131	13.2503	5.58313	1.29116	5.06944	5.35821	5.22888	5.95514	6.42987
cra_locus_109382_iso_1_len_342_ver_3	Gene of unknown function	3.11145	4.87694	0	4.66889	2.97103	2.75007	2.40887	0	3.44706	2.56806	2.48655	6.18994	2.93774	2.63542	2.39054	3.24019	0	0	2.99958	0	0	0	0
cra_locus_109385_iso_1_len_323_ver_3	Conserved gene of unknown function	0	0	3.06062	3.92417	3.84083	2.09128	3.74818	3.50656	4.799	4.83711	0	3.7657	0	2.99593	3.91954	4.05834	0	5.78191	2.70213	6.60606	4.1041	0	0
cra_locus_109388_iso_1_len_671_ver_3	Gene of unknown function	0.672801	25.9626	23.7175	26.7737	0	0	0	19.6425	20.0358	19.2608	16.0888	23.4231	0.659475	0.551074	1.24288	0	3.22934	0	3.42984	2.72197	2.73334	1.23038	2.06736
cra_locus_10938_iso_1_len_1840_ver_3	Auxin:hydrogen symporter	9.50044	3.33786	4.58645	5.39374	5.28163	5.33016	6.08485	4.66793	13.3818	11.1302	4.8836	3.8208	4.99927	4.67429	3.57512	4.24949	4.49256	6.00732	1.91419	3.64628	4.785	4.53064	6.92956
cra_locus_109397_iso_1_len_315_ver_3	Xylem serine proteinase 1	2.45931	0	0	0	0	6.01937	3.24465	0	3.1921	3.45907	0	0	0	0	2.41868	0	0	0	0	5.43267	0	0	29.7866
cra_locus_1093_iso_3_len_1677_ver_3	Conserved gene of unknown function	8.25684	26.4354	34.4193	37.2435	21.6643	5.67073	3.09699	29.735	24.0221	21.742	22.3895	37.1445	14.1206	7.77291	7.27342	1.5204	31.6456	32.1563	26.031	20.4273	5.95707	28.6428	4.33552
cra_locus_109409_iso_1_len_435_ver_3	Gene of unknown function	0	17.4455	23.2711	18.1865	1.96326	4.39169	0	23.1917	21.4641	23.91	16.2071	18.8609	0	0	2.82481	0	0	0	0	0	0	0	0
cra_locus_109414_iso_1_len_466_ver_3	ATM (ATAXIA-TELANGIECTASIA MUTATED)	2.84762	18.4435	9.97867	15.8404	6.83998	5.20571	3.98157	13.5255	8.73626	9.19682	7.77156	13.0895	2.58972	4.1337	8.12852	7.91795	8.93659	6.02933	4.95794	4.74064	3.01212	4.75048	0
cra_locus_10941_iso_4_len_2390_ver_3	ATP-dependent transporter	191.097	72.1022	81.8527	68.6067	111.888	133.514	105.114	94.5201	83.3812	88.9883	71.4429	72.7213	73.6677	98.4892	117.049	128.311	73.3999	119.121	76.7173	102.278	119.076	93.2447	107.237
cra_locus_10942_iso_3_len_1578_ver_3	Nuclear acid binding protein	30.3881	77.9304	67.3404	72.2464	65.5233	50.4491	69.493	84.3912	79.3511	81.9888	77.0114	66.708	46.0738	55.9364	32.6105	45.1765	38.3428	49.6028	36.2735	65.4499	58.0678	66.6268	56.7114
cra_locus_10944_iso_1_len_1583_ver_3	Tyrosine-specific transport protein	3.93426	2.31821	2.8061	4.30599	9.5746	7.35904	4.40398	1.32681	2.24309	1.71089	2.45862	3.85899	13.5182	11.2141	1.57225	3.76219	1.20417	0.875101	1.30127	0.833196	0	0	1.00208
cra_locus_109458_iso_2_len_357_ver_3	Gene of unknown function	0	293.196	252.389	301.206	0	0	0	203.672	281.625	321.785	227.145	340.629	0	0	0	0	0	0	0	7.50029	3.67868	0	0
cra_locus_10945_iso_1_len_1247_ver_3	Gene of unknown function	2.35431	1.20314	1.5912	3.03109	1.74512	1.06006	1.04759	1.46711	5.99632	4.67031	1.56843	2.4239	2.03252	0.847622	0.653688	1.27348	0.868377	0	1.0673	0	0.900587	0	0
cra_locus_10946_iso_4_len_1899_ver_3	NADH dehydrogenase	7.81191	21.3218	22.2457	22.9096	14.3149	12.1981	13.0884	19.9938	22.5017	23.0791	17.2911	18.5999	19.0635	19.1793	7.53141	10.9745	6.26517	4.63604	5.67724	5.81616	7.74293	6.76657	5.92717
cra_locus_109472_iso_1_len_283_ver_3	Gene of unknown function	5.32527	0	0	0	0	2.90474	2.74007	0	0	0	0	0	3.8986	2.6079	0	3.05334	3.52347	0	3.412	0	0	0	0
cra_locus_109479_iso_1_len_352_ver_3	Cell division cycle	4.18767	9.82997	12.2148	8.81056	10.2823	8.56583	6.82332	9.5752	11.0488	10.1456	15.3336	11.9966	4.37968	4.93492	4.98694	7.94204	4.53401	7.36791	4.69546	0	3.73562	3.67264	0
cra_locus_109489_iso_1_len_379_ver_3	Gene of unknown function	2.31877	2.96574	2.76869	2.63705	1.89782	3.16201	3.6456	1.96368	2.6084	2.6499	2.02153	2.63599	2.82927	2.03908	3.93999	3.92036	0	3.15693	2.88883	0	0	0	0
cra_locus_10948_iso_1_len_685_ver_3	Gene of unknown function	3.05164	2.1408	4.74813	4.33813	4.86028	2.06195	2.29871	4.81939	5.81974	9.04842	3.12783	6.7507	0	2.07811	2.43602	0	36.2152	12.3086	12.8808	6.31604	1.83934	12.2062	2.6531
cra_locus_10949_iso_3_len_1018_ver_3	Gene of unknown function	25.1649	28.2136	32.0185	30.9522	26.6969	27.6954	26.3306	22.0288	31.2586	26.0385	31.0481	33.396	25.2099	30.4663	31.8293	26.5109	24.1035	24.8363	19.4974	16.4302	15.8048	18.5916	17.5515
cra_locus_1094_iso_4_len_2853_ver_3	Membrane protein	34.4281	22.4106	19.657	15.034	82.6529	67.4815	34.7183	35.0213	13.6511	10.2574	15.5085	14.2276	74.8258	63.4327	85.036	32.4902	41.4863	36.5226	28.2205	35.0972	23.8488	64.3049	39.9616
cra_locus_109503_iso_1_len_320_ver_3	Gene of unknown function	2.41705	3.77686	10.228	8.19357	3.24259	2.95797	2.59098	6.42546	2.85204	5.31193	9.72558	7.60903	3.88903	3.59498	3.56459	3.07514	4.53092	0	4.71544	0	0	0	0
cra_locus_109504_iso_1_len_322_ver_3	Gag-pol polyprotein	3.32384	6.87698	4.25225	8.92515	0	0	2.17741	0	11.8968	10.3403	0	3.77855	2.89687	2.25475	3.73649	6.92273	3.88752	0	4.19028	0	0	0	0
cra_locus_109505_iso_1_len_333_ver_3	Gene of unknown function	3.55952	4.21791	4.09838	7.84319	0	0	0	4.06946	4.91415	8.54243	3.95662	3.94531	0	0	0	0	0	0	0	0	0	0	0
cra_locus_109509_iso_1_len_760_ver_3	Midasin	2.59051	14.701	12.9723	13.573	6.45156	7.65391	2.77693	10.8123	6.81213	13.0259	12.9699	17.6694	2.22549	4.17408	4.68078	6.36566	4.1181	1.51152	9.38572	0	1.65062	0	1.37841
cra_locus_109516_iso_1_len_494_ver_3	Gene of unknown function	0	37.5547	57.9042	42.5094	0	0	0	51.14	17.6698	31.7798	72.7317	84.9185	0	0	0	0	0	0	0	0	0	0	0
cra_locus_10951_iso_5_len_2258_ver_3	Phosphofructokinase	22.574	6.65653	7.08008	7.07372	16.2111	12.716	7.80595	13.3511	23.1595	19.1124	7.93558	7.57447	15.1681	13.8205	8.02193	6.47696	8.35868	9.60903	6.7717	7.95809	9.94064	9.88997	6.61636
cra_locus_10952_iso_1_len_1632_ver_3	NAC domain-containing protein	93.426	39.7285	36.2278	28.4049	1.98898	6.29027	8.17691	13.1626	21.3311	29.8933	58.3949	50.7053	1.98561	0.812725	3.54427	3.31224	0.964344	34.3582	1.30655	2.82705	14.9175	1.23338	5.37153
cra_locus_10953_iso_1_len_785_ver_3	Phosphatase	7.37141	1.04996	2.19737	1.93302	4.04166	7.9701	0.767172	6.72741	82.226	10.6323	1.12307	0	3.5553	2.59401	12.0666	3.8667	68.7688	105.961	127.915	29.8007	63.6965	7.97642	4.96782
cra_locus_10955_iso_1_len_1639_ver_3	Zinc finger protein	2.35238	0	0	0.716588	8.99403	8.89794	4.17875	0.640329	0	0.384043	0.48341	0	8.21543	4.31563	10.1983	5.33584	5.05343	6.28218	4.79976	1.60843	0.749445	2.21043	1.59307
cra_locus_109562_iso_1_len_604_ver_3	Natterin	3.10514	3.71665	13.6027	3.74537	9.12605	9.73045	3.53033	9.56225	1.44338	2.47324	8.36738	11.8734	21.7731	0	0	5.91389	0	0	0	4.50361	5.72303	4.81382	2.2303
cra_locus_109569_iso_1_len_381_ver_3	Gene of unknown function	5.68714	0	0	0	3.58537	2.96938	5.43733	0	0	2.28353	0	0	2.61225	3.5868	2.77474	3.89808	3.23592	2.65607	5.33448	0	0	0	0
cra_locus_10956_iso_2_len_371_ver_3	Gene of unknown function	47.9349	8.39119	40.0731	69.0425	17.0915	36.4947	194.175	10.8519	11.6483	15.0057	108.199	120.315	0	0	2.35289	0	0	0	0	0	0	0	0
cra_locus_109594_iso_1_len_387_ver_3	Gene of unknown function	3.17374	0	0	0	4.63853	6.52619	5.83222	4.03157	0	3.45424	0	4.12333	3.9515	7.51157	5.9365	5.49917	5.22705	4.98569	6.45548	5.78676	6.43442	3.58972	6.65263
cra_locus_109597_iso_1_len_329_ver_3	Gene of unknown function	6.85326	7.32711	7.15244	3.84569	5.75673	6.55825	0	10.7675	4.70302	5.77088	15.33	12.3013	3.06504	4.58593	5.75974	2.38631	8.94962	12.7491	6.25912	4.74755	0	5.93132	5.4961
cra_locus_1095_iso_4_len_2113_ver_3	SEC14 cytosolic factor	31.3361	10.7821	9.00089	11.4411	30.9489	31.2728	39.8807	10.6028	14.9342	12.5205	5.05868	6.33067	26.3038	30.6359	40.537	39.0179	49.4252	27.6109	53.2645	50.7601	28.7914	47.3879	28.0871
cra_locus_109604_iso_1_len_303_ver_3	Gene of unknown function	14.0198	0	0	0	86.06	127.567	45.0862	0	0	0	0	0	0	0	0	0	0	0	0	0	0	0	0
cra_locus_10961_iso_3_len_1011_ver_3	Conserved gene of unknown function	5.56474	4.41467	2.32603	3.52456	8.45516	7.38805	11.2807	2.23963	8.029	5.54085	1.72921	1.87901	7.34689	6.75732	12.9854	11.6642	9.69363	8.4821	7.9428	4.35112	4.91489	6.74471	4.94388
cra_locus_109625_iso_1_len_309_ver_3	Gene of unknown function	0	0	0	0	3.32119	3.95252	2.69277	0	0	0	0	0	6.06273	4.13234	4.73695	2.13063	10.17	3.33906	9.02758	4.62424	0	3.8836	0
cra_locus_10962_iso_4_len_3498_ver_3	Conserved gene of unknown function	20.1664	12.3738	10.5153	11.2411	15.3948	16.678	14.3282	10.342	16.6276	15.2394	12.2988	13.936	16.4545	15.9655	19.326	22.5457	21.5538	20.0419	18.3206	12.8396	12.3636	14.9323	13.9158
cra_locus_109633_iso_1_len_470_ver_3	DNA-directed RNA polymerase	3.68059	6.09208	4.23778	8.54598	6.77794	7.38919	5.39212	3.27279	8.84522	8.13195	1.76483	2.09205	3.84935	4.09578	4.80638	8.6578	4.42777	4.04734	10.1535	4.40404	4.72594	2.46578	4.77741
cra_locus_10963_iso_2_len_1010_ver_3	AP2/ERF domain-containing transcription factor	12.4645	13.8798	13.2645	15.3278	11.5106	15.4492	11.2331	11.4196	13.1133	16.2613	10.7824	11.6144	9.04868	10.0355	13.3756	13.6525	14.2232	18.2809	14.4292	16.8262	15.8773	13.6521	19.6087
cra_locus_10964_iso_1_len_361_ver_3	Gene of unknown function	4.23712	2.39087	0	0	2.60093	0	2.27101	0	0	0	0	0	2.13048	3.47521	4.15687	0	0	3.07208	3.26298	0	0	0	2.75909
cra_locus_10966_iso_4_len_1180_ver_3	Protein kinase; Type I EGF	5.73482	4.7744	4.57038	4.41035	2.4238	3.41872	0	14.5698	21.7761	31.8018	13.2778	9.45841	0	0	5.28813	0	26.9316	26.3622	27.3573	17.0988	24.4924	14.8584	18.6228
cra_locus_109675_iso_1_len_341_ver_3	Gene of unknown function	3.98849	5.08827	4.21515	5.91645	2.12897	1.97063	5.20497	0	3.99012	2.57629	2.72129	5.91407	3.85398	8.46081	9.77779	8.60447	4.95463	4.08626	2.77772	0	0	4.75266	0
cra_locus_10967_iso_1_len_394_ver_3	Gene of unknown function	0	2.67657	0	0	0	0	0	0	4.77503	2.2022	0	0	0	0	0	1.96135	0	0	2.37438	0	0	0	0
cra_locus_109689_iso_2_len_305_ver_3	Gene of unknown function	0	0	5.26652	0	19.9753	23.1677	6.30415	5.22935	0	0	0	5.01411	0	33.1473	25.4973	7.56528	25.6462	25.5598	20.6719	6.56776	0	5.73074	0
cra_locus_10968_iso_3_len_3449_ver_3	Replication factor C / DNA polymerase III gamma-tau subunit	3.13238	3.9635	2.36796	2.00156	23.3066	16.0001	28.0155	4.30057	5.79991	4.48364	1.07579	1.67254	17.0211	33.2131	9.91776	13.8678	11.6569	7.1077	10.2629	12.645	2.08478	14.6838	2.78555
cra_locus_109691_iso_1_len_349_ver_3	Polyadenylate-binding protein	0	10.6854	12.113	7.93174	2.28332	0	0	29.6392	26.9732	21.4476	41.3466	14.7039	0	0	0	0	0	0	0	0	0	0	0
cra_locus_1096_iso_2_len_2669_ver_3	Sec34-like family protein	30.0035	29.2344	19.3756	23.5694	26.494	25.9209	32.2505	31.2663	29.2681	39.2298	22.4321	20.2342	20.2014	21.0911	28.4584	35.5008	26.627	24.7578	28.9977	30.9474	35.4835	25.7997	26.6131
cra_locus_109701_iso_1_len_295_ver_3	Gene of unknown function	5.49183	9.64094	10.1484	8.67449	3.24627	3.9294	4.03345	6.45946	6.5522	7.4383	9.84167	11.4457	2.925	14.0987	7.16105	6.21347	9.32853	6.13673	5.97314	6.18406	0	4.088	4.13241
cra_locus_10970_iso_2_len_2933_ver_3	Receptor protein kinase	35.7531	5.74008	3.47993	2.54261	8.18861	9.9932	3.63487	8.44908	4.48696	8.53794	12.2552	2.54158	16.3433	13.2158	25.7887	13.4558	31.2665	12.4096	26.2621	20.376	32.711	16.7823	34.603
cra_locus_109712_iso_1_len_311_ver_3	Gene of unknown function	1.91861	4.33044	3.92721	4.63665	0	0	0	3.16834	15.0096	4.60443	0	3.27161	0	0	0	0	0	0	2.56102	0	0	0	0
cra_locus_10971_iso_1_len_686_ver_3	Auxin response factor 8	32.8929	7.52653	10.0594	5.44242	37.1482	36.1181	15.1359	9.72598	4.48283	3.99826	5.76037	8.56429	21.1533	57.2659	42.867	42.7616	33.3104	38.4199	41.1657	12.9078	12.6047	17.3785	15.7539
cra_locus_109721_iso_1_len_346_ver_3	Gene of unknown function	3.58422	4.62278	2.62021	2.91156	2.30493	0	0	3.03534	3.92718	3.5109	2.90157	7.27599	0	2.25475	3.26754	3.1993	4.87648	6.16677	4.78433	5.30985	5.53648	5.30139	4.0455
cra_locus_109728_iso_1_len_341_ver_3	Gene of unknown function	2.25436	1.95703	0	0	0	2.75888	0	0	0	0	0	0	0	2.1152	2.39833	2.10331	0	3.26901	3.24067	0	0	0	2.93595
cra_locus_10972_iso_3_len_983_ver_3	60S ribosomal protein L18A	87.8685	60.3454	62.6467	43.4069	114.043	96.8273	53.6419	62.8523	37.8376	37.7779	42.8652	60.97	46.5558	74.4393	157.251	85.6837	99.344	122.271	92.1976	100.35	84.2682	94.5389	77.9091
cra_locus_10973_iso_6_len_1174_ver_3	Early nodule-specific ENOD8 gene	15.1682	29.863	23.5157	33.1166	20.7103	17.8813	19.0964	18.5477	20.658	20.7363	17.5494	29.5714	15.9378	15.7595	20.7174	25.0093	17.9064	18.8546	17.5348	15.2661	14.6575	18.735	13.9203
cra_locus_10974_iso_1_len_1420_ver_3	Transporter	1.94481	2.1509	1.49282	1.54823	11.6516	7.77938	4.96174	7.11497	2.02862	2.66704	0	0.795913	1.27124	4.3338	6.17045	15.0967	3.62641	2.74963	2.80368	4.93341	1.57716	3.83766	5.07069
cra_locus_10975_iso_5_len_1662_ver_3	Quercetin 3-O-glucoside-6''-O-malonyltransferase	8.94567	11.3294	15.3015	13.5647	18.7109	12.9142	4.15541	9.89053	7.47103	12.9493	42.4608	25.1411	38.4195	30.2812	4.6618	10.7406	1.29539	1.87372	1.14987	1.03076	0	0	0
cra_locus_109765_iso_1_len_373_ver_3	Gene of unknown function	0	17.0398	16.7006	10.5086	0	0	0	17.9813	16.6472	21.3892	11.3124	29.7698	0	0	0	0	2.83815	0	14.4861	15.9962	8.60951	0	2.92912
cra_locus_10976_iso_1_len_2554_ver_3	Conserved gene of unknown function	9.27815	8.80221	9.75893	9.32104	7.18166	6.98843	5.37488	8.22022	6.90251	7.19932	7.90199	8.62307	5.18233	6.65687	11.1926	12.7112	10.9232	12.219	10.8403	11.3326	7.90648	9.63105	6.38491
cra_locus_10977_iso_3_len_873_ver_3	Tsi1-interacting protein TSIP1	21.0906	13.4562	14.1879	13.8518	18.2587	20.2517	23.0893	16.0421	22.027	26.0803	18.3591	15.0851	23.2979	19.4784	24.6396	13.9248	12.6282	17.9253	12.4076	9.05124	12.4768	11.4785	16.714
cra_locus_109787_iso_1_len_391_ver_3	Gene of unknown function	2.39137	0	0	0	0	0	0	0	0	0	0	0	0	0	0	0	0	0	79.0038	57.2282	73.3297	0	0
cra_locus_10978_iso_7_len_1481_ver_3	Trimethylguanosine synthase homolog	1.75132	4.87801	4.52867	5.93275	6.45024	5.71645	5.51223	6.4374	7.202	6.34491	4.04446	3.93946	4.67648	3.77713	4.85352	6.16298	7.62052	7.08285	8.35611	3.56691	3.32398	3.94877	3.59593
cra_locus_109790_iso_1_len_467_ver_3	Polyprotein	3.95286	13.8706	10.6668	17.7358	0	1.96523	0	8.23784	14.3059	19.9041	8.31901	13.9021	6.7825	3.49929	6.60536	6.26541	5.20111	0	3.29775	0	0	0	0
cra_locus_109791_iso_1_len_344_ver_3	Gene of unknown function	5.32459	8.91659	4.83421	7.08095	5.27173	5.27002	4.78715	4.14554	4.21559	7.06639	3.36922	3.22176	4.04182	5.4114	6.39454	6.06046	5.42401	5.66628	5.27326	0	5.57163	5.64888	6.10678
cra_locus_109799_iso_1_len_340_ver_3	Gene of unknown function	4.87116	11.1909	23.8143	19.2903	5.98028	5.7332	3.17032	6.18779	5.87099	4.17508	15.9253	15.426	5.91327	7.07372	4.99742	2.11008	9.4179	4.91928	11.1466	0	0	5.0858	0
cra_locus_10979_iso_2_len_1712_ver_3	Cytokinin oxidase/dehydrogenase 1	0	1.05212	1.27494	0.959709	0.710415	0.657579	0.344612	0.980088	0.690388	0.698032	0.504482	1.09637	1.09271	0.773978	7.5269	1.41789	0	0.757524	0	0	0	0	0
cra_locus_1097_iso_4_len_3256_ver_3	Conserved gene of unknown function	28.6871	47.417	34.4048	41.9725	23.5272	24.3877	23.0771	39.4226	36.7521	42.7279	27.5165	33.0213	27.5957	28.1319	36.3344	44.4428	32.2214	30.7633	34.3759	27.4445	28.2812	27.019	26.3706
cra_locus_10981_iso_1_len_1546_ver_3	Ubiquitin/ribosomal fusion protein	36.0677	42.7171	44.5006	28.7922	77.308	76.9903	81.0934	58.4558	45.2623	52.3443	55.4672	55.6978	30.8358	79.5247	60.335	39.318	57.8019	75.7655	45.9792	52.7347	43.7021	57.2674	30.6668
cra_locus_109829_iso_1_len_391_ver_3	Conserved gene of unknown function	4.03543	10.1203	24.857	5.31173	18.8996	14.4368	5.20683	16.7075	3.66826	2.39125	14.268	31.3479	29.3088	0	0	12.0304	0	0	0	18.2415	22.5743	33.0428	17.2069
cra_locus_10982_iso_2_len_1337_ver_3	Avr9/Cf-9 rapidly elicited protein 231	24.1568	9.10287	4.44514	3.99858	5.89079	11.8925	15.4307	10.7191	5.90098	6.66526	4.21925	2.53925	3.29865	6.64484	44.032	21.391	17.541	23.5228	23.5214	41.9717	76.9015	11.4122	30.744
cra_locus_109830_iso_1_len_300_ver_3	Gene of unknown function	2.79508	5.18215	5.36369	6.24393	0	0	0	3.80417	3.98129	5.70396	3.39408	5.10662	0	0	0	3.30208	0	0	3.73096	0	0	0	0
cra_locus_109831_iso_1_len_377_ver_3	Gene of unknown function	5.75251	12.4575	18.2988	15.9132	5.15357	5.47699	1.66661	6.51737	10.9705	5.15257	17.2818	12.7255	3.25204	3.62863	8.25618	3.77146	18.4697	15.3869	11.8292	4.83685	4.41288	4.26101	3.94835
cra_locus_10983_iso_5_len_1191_ver_3	Glutathione S-transferase T4	15.086	10.667	9.64989	8.67101	16.2915	14.7095	6.58844	17.2709	5.57106	3.83117	5.90628	9.13068	43.7661	21.842	8.32183	7.08498	8.26205	18.4325	9.63357	2.89711	2.54877	4.84919	3.5474
cra_locus_10984_iso_1_len_1090_ver_3	Conserved gene of unknown function	111.881	2.18685	3.78378	2.17475	21.0352	28.1051	15.3605	4.85829	3.67648	3.78794	4.40126	2.34779	12.4664	17.3206	12.3358	31.4875	19.4007	16.6624	10.959	11.2272	18.5059	12.2987	16.0583
cra_locus_10985_iso_6_len_959_ver_3	Gamma-secretase subunit APH1	18.8494	78.0639	97.425	93.6198	34.6404	39.5346	43.5298	103.61	98.8795	110.697	75.2423	86.3073	20.535	20.7681	31.0434	27.8402	20.2088	37.105	20.346	28.8195	29.487	27.5307	25.9046
cra_locus_109866_iso_1_len_277_ver_3	Gene of unknown function	4.14512	5.41655	0	3.4115	2.94622	4.46252	3.74182	0	0	0	0	0	3.70772	3.34037	2.56383	5.77332	0	0	3.78576	0	0	0	0
cra_locus_10986_iso_5_len_4329_ver_3	Retroelement pol polyprotein	13.9037	19.4822	20.25	21.9294	17.4247	17.5014	15.6056	20.219	12.6422	16.3636	18.8896	21.9063	13.8667	14.023	19.1077	19.5899	18.5993	23.5019	18.5254	19.2411	20.6118	16.6905	14.8054
cra_locus_10987_iso_2_len_1871_ver_3	Pentatricopeptide repeat-containing protein	1.79174	4.50818	4.2838	3.54923	3.13728	3.03746	2.73933	5.74604	4.64084	6.94842	5.07029	3.70641	1.76638	4.12409	3.54562	2.29951	4.37278	3.04539	3.92077	6.5372	3.21571	8.96245	2.98377
cra_locus_10988_iso_2_len_1672_ver_3	DNA polymerase zeta catalytic subunit	1.5148	5.98329	5.81373	7.06877	7.19625	5.9126	6.07163	4.09946	5.35448	5.30624	4.52169	4.66071	3.22878	5.21978	4.42588	3.34054	2.72356	3.05213	2.41761	3.94031	3.47167	4.15156	1.89559
cra_locus_109899_iso_1_len_327_ver_3	Tetracycline resistance protein	5.26522	3.89304	0	0	0	0	1.94625	0	0	2.07486	0	0	4.7471	0	0	3.40329	0	0	0	10.8623	8.83421	13.6009	3.38127
cra_locus_10989_iso_2_len_1987_ver_3	ATP binding protein	1.24347	7.54665	4.73703	4.28172	10.9575	9.67158	16.7359	8.95087	13.0129	8.39991	6.2876	7.20925	2.0591	8.94972	3.62503	5.51483	7.7288	5.81676	9.47942	11.1756	3.13724	12.1676	5.94148
cra_locus_1098_iso_2_len_2155_ver_3	Conserved gene of unknown function	35.1452	43.0804	37.0178	34.9115	27.4943	33.8362	33.3367	39.8924	31.6987	36.3249	28.5877	27.5997	27.4809	35.0809	37.064	39.0609	50.5535	40.3382	48.7473	33.0092	38.4901	36.8731	41.2337
cra_locus_10990_iso_3_len_2274_ver_3	DJ-1 family protein	5.47072	10.2536	9.03369	7.63999	13.9061	12.2693	14.9064	9.42914	7.98522	6.63753	6.2717	7.27391	10.1135	13.0453	7.13024	6.90912	5.25489	7.49614	4.60025	5.99812	4.00655	5.06386	4.20266
cra_locus_109912_iso_1_len_617_ver_3	Kinase	0	10.7996	4.59093	0	6.66497	5.12363	2.46591	50.7283	1.41147	1.68247	1.92527	2.51046	0	0	3.01159	0	17.7111	16.4785	11.6683	13.2121	7.64856	18.1571	5.60827
cra_locus_10991_iso_1_len_729_ver_3	Gene of unknown function	0	0	0	0	0	0	0.828546	0	0	0	0	0	1.1115	0	1.30388	0	0	0	0	0	0	0	0
cra_locus_10992_iso_1_len_2156_ver_3	Conserved gene of unknown function	3.76469	7.98048	7.6474	6.72589	2.93551	3.55547	2.18141	9.0475	8.81841	9.50574	4.85662	6.50631	2.22804	3.77421	6.77941	3.53402	3.86337	3.23673	4.54987	4.50467	4.38353	3.3463	3.96208
cra_locus_109937_iso_1_len_281_ver_3	Gene of unknown function	3.86462	7.02666	6.31744	3.35735	3.9538	2.68381	2.76182	3.54553	0	3.68041	5.61537	4.75942	4.77159	3.72444	5.04463	4.02452	9.68574	3.37278	6.30498	0	0	5.88425	0
cra_locus_10993_iso_1_len_297_ver_3	Major latex	43.5051	0	0	2.86992	460.003	302.366	438.012	3.0774	0	0	0	0	19.6621	11.9339	1128.87	79.5788	2404.67	237.378	2122.75	1745.68	1012.95	2927.68	1942.32
cra_locus_10994_iso_4_len_3191_ver_3	Terminal deoxycytidyl transferase rev1	6.27971	16.3172	14.36	15.1784	8.21364	7.77781	6.23637	12.0308	11.2077	12.6908	13.6942	16.8062	5.30153	8.87042	6.37774	6.6978	11.1156	6.90813	10.0611	6.92027	7.52785	6.09639	7.4162
cra_locus_109953_iso_1_len_384_ver_3	Gene of unknown function	4.87704	23.3917	23.7873	23.3991	5.23906	8.65966	6.37163	28.4595	51.9008	44.9363	23.3188	27.288	6.17658	19.481	4.53099	6.89004	0	0	3.45845	0	0	0	0
cra_locus_10995_iso_8_len_1322_ver_3	Protein phosphatase	8.45255	7.08344	13.0083	9.93396	8.88733	7.51308	3.49873	4.51813	7.189	6.7904	10.0686	11.1311	28.063	18.6962	1.36317	4.10636	1.44724	2.30069	1.1171	1.70235	2.46021	1.14681	1.62942
cra_locus_10996_iso_1_len_2661_ver_3	Cc-nbs-lrr resistance protein	6.78365	7.23803	5.12817	8.12388	7.89918	6.35393	10.3568	4.67418	10.6896	8.17521	1.39787	3.96099	11.4751	8.61044	7.26563	12.3758	10.2937	8.88047	8.42392	6.83797	6.08471	7.02354	7.06502
cra_locus_109976_iso_1_len_342_ver_3	Gene of unknown function	4.84004	0	2.43255	4.17743	2.33438	0	2.96476	0	0	0	0	0	16.7225	17.0424	0	3.43079	0	0	2.30737	0	0	0	0
cra_locus_10997_iso_1_len_483_ver_3	Gene of unknown function	0	0	0	0	0	0	0	0	0	0	0	0	0	0	0	0	0	0	0	0	0	0	0
cra_locus_109989_iso_1_len_500_ver_3	Gene of unknown function	3.33129	2.46311	3.8209	5.38887	3.94876	1.95808	2.46277	0	0	1.70659	6.0088	4.30936	5.55643	3.13536	2.91695	7.85302	3.28205	2.16546	5.21338	0	3.26047	2.30872	0
cra_locus_10998_iso_1_len_563_ver_3	Gene of unknown function	0	0	0	0	0	0	1.73777	0	0	0	0	0	4.50352	4.50097	0	0	0	0	0	0	0	0	0
cra_locus_109992_iso_1_len_339_ver_3	Midasin	2.09438	14.5754	9.15453	8.68382	2.35697	3.76835	2.61927	5.32093	6.6931	10.5711	8.21655	12.7973	4.33518	3.37103	2.41405	4.8111	2.88698	0	4.6594	0	0	0	0
cra_locus_109994_iso_1_len_279_ver_3	Gene of unknown function	7.57466	16.6081	17.4427	11.6909	13.2848	9.09957	5.79982	14.8454	8.9634	8.65633	11.3206	26.9398	11.6	6.18445	4.16111	17.6587	5.20705	9.85932	3.75547	0	0	0	4.39688
cra_locus_10999_iso_9_len_2504_ver_3	Adaptor complexes medium subunit family protein	15.4554	23.3629	17.9545	22.4992	16.1832	14.6815	19.2624	21.41	24.8816	24.7823	18.7819	20.9494	11.6315	13.2984	15.9823	14.4866	13.2806	16.5524	11.4386	16.0606	14.7585	15.8967	13.842
cra_locus_1099_iso_10_len_1532_ver_3	Serine-threonine kinase receptor-associated protein	58.0285	81.9405	79.625	71.4382	75.351	89.8323	76.0961	120.309	99.3946	115.681	64.3044	59.3579	47.3428	41.7956	102.726	77.3604	73.9983	111.403	68.0402	83.6486	103.196	81.2284	111.775
cra_locus_109_iso_4_len_1880_ver_3	Cytochrome P450 obtusifoliol 14-alpha-demethylase	182.862	158.338	224.404	163.302	186.639	158.343	142.943	161.666	170.114	106.125	128.415	154.887	113.568	160.29	107.43	204.708	133.007	169.483	100.449	191.594	53.3043	307.086	38.2784
cra_locus_10_iso_1_len_1622_ver_3	Ankyrin repeat-containing protein	12.4648	37.9081	26.7223	24.0929	7.17193	6.52274	2.00245	27.1377	10.1073	16.4572	5.37425	13.7839	24.7317	13.4603	12.4474	17.564	14.607	17.5537	13.3742	8.29054	7.84986	7.1985	3.10514
cra_locus_11000_iso_1_len_1018_ver_3	WD-repeat protein	0	0	0	0	7.05207	3.85438	10.2039	0	0	0	0	0	1.07278	6.81924	1.3814	4.70505	1.80983	1.03127	3.72422	4.1894	0	4.79783	1.20407
cra_locus_110010_iso_1_len_288_ver_3	Multidrug/pheromone exporter, MDR family, ABC transporter family	0	6.83675	5.6122	6.23626	0	2.37388	0	4.77651	6.0884	8.59426	3.82452	6.76807	0	0	0	0	0	3.28163	2.78844	0	0	0	0
cra_locus_110011_iso_3_len_430_ver_3	Gene of unknown function	0	30.9103	22.6121	22.2494	0	0	0	35.1356	32.0802	34.539	13.4097	30.8299	0	0	0	0	0	0	0	0	0	0	0
cra_locus_11001_iso_1_len_926_ver_3	60S ribosomal protein L12	99.1919	216.192	175.435	154.385	224.597	193.498	314.626	208.714	181.117	180.426	199.68	200.667	94.7033	96.9135	96.8296	140.398	95.9631	107.261	140.899	202.085	158.606	229.891	131.735
cra_locus_110026_iso_1_len_292_ver_3	Gene of unknown function	4.11443	0	0	0	12.3755	11.2213	2.86683	0	0	0	0	0	14.5229	28.9447	0	0	0	0	0	0	0	0	0
cra_locus_11002_iso_1_len_1969_ver_3	Trytophan synthase alpha subunit	2.64946	5.85414	4.7453	6.4227	3.35543	3.39111	2.72053	3.96784	6.54544	5.64127	4.85063	5.1361	2.0782	2.74065	3.39532	2.52161	2.64211	3.63635	1.86136	1.46832	1.41355	1.88539	2.12478
cra_locus_110037_iso_1_len_453_ver_3	Leucine-rich repeat receptor protein kinase EXS	2.2969	0	0	0	25.6922	22.4763	11.0798	3.8903	0	0	0	0	0	16.5312	10.4083	11.1155	10.7457	8.61969	7.83526	3.05374	0	7.22763	0
cra_locus_11003_iso_1_len_853_ver_3	Gene of unknown function	0	0	0	0	0	0	0	0	0	0	0	0	0	0	0	0	0	0	0	0	0	0	0
cra_locus_11004_iso_2_len_1268_ver_3	Conserved gene of unknown function	1.74672	0.689935	1.62009	1.11739	12.9738	8.98187	24.3883	1.44225	6.36358	5.83875	0	0.819092	3.59653	10.3053	4.26846	6.06688	11.8856	3.97874	13.5232	16.7204	1.15092	15.6381	3.77053
cra_locus_110054_iso_1_len_305_ver_3	9-cis-epoxycarotenoid dioxygenase 1	11.5659	0	0	0	0	0	0	0	0	0	0	0	2.81902	0	9.61373	3.02611	0	0	3.14003	0	20.6665	0	21.241
cra_locus_11005_iso_4_len_4255_ver_3	AP-3 complex subunit delta	14.8641	10.5185	11.4161	11.6117	12.3385	11.319	10.4852	10.75	13.3153	13.6069	9.52646	10.3918	12.9379	12.2945	19.5098	16.6578	15.7099	16.0898	16.2522	13.9712	9.6298	13.2634	11.4881
cra_locus_110063_iso_1_len_320_ver_3	Receptor kinase	0	0	0	0	12.0978	11.198	16.7417	0	0	0	0	0	0	7.00076	6.53508	10.2505	6.98971	3.50491	5.2118	7.56405	0	9.85156	0
cra_locus_11006_iso_1_len_3585_ver_3	Ethylene receptor homolog	18.1363	35.8011	24.6425	13.0857	23.9656	23.4627	23.5842	45.9222	26.8402	45.1386	55.1942	24.3881	6.98168	14.0809	9.56982	26.6748	18.5097	10.1104	16.3492	22.4658	13.2333	25.9092	7.934
cra_locus_110075_iso_1_len_278_ver_3	Gene of unknown function	4.34576	7.35654	5.83759	5.86893	3.73467	2.71614	5.12434	0	3.66642	8.19446	5.68302	7.4104	0	0	2.3212	3.35424	0	0	5.80086	0	0	0	0
cra_locus_110079_iso_1_len_323_ver_3	Gene of unknown function	3.68059	2.28453	2.35432	3.40095	0	0	2.36727	3.74034	3.38753	4.20618	2.40659	0	0	2.99593	3.52759	0	3.32082	0	2.45649	0	0	0	0
cra_locus_11007_iso_1_len_818_ver_3	Diphthamide biosynthesis protein	15.9091	6.73277	8.8605	7.21372	15.9956	12.7019	11.5408	11.1499	9.993	11.5198	7.35335	8.53605	12.8196	11.3888	24.7066	21.3981	19.9018	31.6708	14.4624	10.8309	12.7904	14.7844	13.8157
cra_locus_11008_iso_4_len_1664_ver_3	Protein BCCIP homolog	6.84995	4.22	3.72545	3.71633	6.13455	5.75351	7.76857	2.90048	4.01013	2.60938	2.42337	3.78067	5.79698	8.23329	8.13077	7.07864	7.56376	6.86191	7.59753	6.01858	5.56844	5.13927	5.43447
cra_locus_110094_iso_1_len_513_ver_3	Gene of unknown function	2.90645	2.90158	3.00322	4.13173	4.66613	2.54064	2.87594	2.13002	2.40067	3.44924	4.9703	4.19362	3.06894	4.85783	4.6114	3.94431	4.70679	4.21459	7.3116	2.9427	0	0	0
cra_locus_110095_iso_1_len_475_ver_3	Serine/threonine protein kinase	4.48851	5.88688	5.12145	6.38074	0	0	1.30041	9.24601	17.4921	15.1111	5.07649	5.58522	1.9031	1.47249	0	2.27395	0	0	0	0	0	0	0
cra_locus_110099_iso_1_len_283_ver_3	Gene of unknown function	0	13.4619	22.0732	16.0489	8.62986	9.68246	5.93682	14.6116	10.7827	14.1189	10.8637	13.8026	0	2.39058	2.95697	2.5836	8.00789	7.02707	5.118	0	0	0	0
cra_locus_11009_iso_9_len_3320_ver_3	Disease resistance protein BS2	14.1879	9.48079	10.4951	12.7138	10.8991	12.3677	8.24769	7.1005	7.69168	7.45879	8.85764	9.36332	16.6782	17.6702	21.252	18.0369	17.1818	18.3883	14.0228	9.59976	7.3661	9.61219	7.06983
cra_locus_1100_iso_3_len_1965_ver_3	Gene of unknown function	9.39007	10.8494	11.7626	9.97178	11.1506	11.2106	13.6307	6.49656	11.0173	10.5394	5.11648	10.8176	6.37532	11.3215	8.57917	10.9855	10.4222	3.68776	10.3705	8.25938	4.53271	7.76137	7.38113
cra_locus_110105_iso_1_len_383_ver_3	Gene of unknown function	2.29257	5.86445	5.27927	7.16993	2.62693	2.77892	0	3.49468	3.98561	5.58923	3.99738	4.16992	2.5975	2.32581	0	2.86491	3.90713	0	3.87625	0	0	0	0
cra_locus_11010_iso_1_len_581_ver_3	Gene of unknown function	0	0	0	0	0	0	0	0	0	0	0	0	0	0	0	0	0	0	0	0	0	0	0
cra_locus_110122_iso_1_len_325_ver_3	Gene of unknown function	3.10737	9.69522	11.6921	9.61423	6.50773	7.89316	4.50662	17.1822	10.9351	12.9511	10.7565	13.4026	2.62855	10.4137	4.4765	3.62783	3.29839	4.88142	3.90382	0	0	0	0
cra_locus_110129_iso_1_len_703_ver_3	Fanconi anemia, complementation group D2	0	3.71429	3.90245	5.24931	3.74496	2.28055	2.92573	5.20054	14.2839	17.0631	1.88956	2.32702	0	1.86042	1.10058	1.77026	2.29354	0	1.28583	0	0	2.64005	0
cra_locus_11012_iso_2_len_1757_ver_3	Transcription factor	0.876697	2.65014	2.04287	1.7359	1.96042	4.58992	1.1076	2.14777	1.44088	2.43316	1.71971	2.02886	7.65443	2.85802	5.78536	7.66435	0.470835	0	0	0.974088	2.85655	0.800911	4.29383
cra_locus_110139_iso_1_len_470_ver_3	C2 domain-containing protein	4.66208	9.96886	8.31861	7.84835	0	0	0	12.7795	14.4911	18.7876	5.29449	8.78662	0	0	0	0	0	0	0	0	0	0	0
cra_locus_11013_iso_1_len_2277_ver_3	Pentatricopeptide repeat-containing protein	6.85936	7.52376	6.25048	8.07458	5.88004	4.43076	5.10838	5.80892	8.26991	7.72886	6.73544	7.01796	5.03429	7.14121	9.89829	8.17373	6.47842	7.41052	6.65021	8.86998	7.31927	7.51969	6.56044
cra_locus_110144_iso_1_len_482_ver_3	DNA binding protein	2.86647	9.70478	5.80629	10.1873	1.9062	2.44306	5.12125	9.40657	17.405	21.5657	13.2761	16.9041	0	0	1.51707	1.58033	1.97563	0	2.07256	0	0	0	0
cra_locus_11014_iso_1_len_1297_ver_3	Kinase	2.68817	0.818618	1.52845	1.81973	1.04769	0.533375	0.731838	0	0	0	0.613793	1.38244	0.669386	0.685529	4.57404	0	1.73243	0.737331	2.10739	1.32746	1.1246	2.41681	1.5893
cra_locus_110153_iso_1_len_472_ver_3	ABC transporter A family member 2	1.34346	0	0	0	17.3931	3.05336	4.05856	1.55144	0	2.65189	0	0	0	0	9.69818	0	2.93852	1.9186	3.42355	0	0	8.70284	0
cra_locus_110158_iso_1_len_294_ver_3	Gene of unknown function	15.721	26.0366	49.3662	45.2776	24.3136	15.5449	8.09786	24.8979	12.2143	12.1329	56.3359	66.1483	9.07502	12.2797	12.8523	6.30345	8.90357	17.3196	14.7167	13.1922	11.1761	9.69901	16.592
cra_locus_11015_iso_3_len_1330_ver_3	Gene of unknown function	2.66157	13.892	20.7492	16.7898	0.970063	1.22873	0.980754	14.3163	14.0982	13.0696	18.3818	26.3446	1.79412	5.01055	7.21078	6.64901	5.19054	10.7794	1.11023	0	0	1.29173	1.40817
cra_locus_110168_iso_1_len_303_ver_3	Class III peroxidase 16	2.96194	0	0	0	7.99994	7.40496	0	0	0	0	0	0	0	0	0	0	114.617	53.6642	0	0	0	28.8629	6.01763
cra_locus_11016_iso_1_len_2773_ver_3	Binding protein	26.8946	42.2119	32.3888	36.8592	22.4398	20.614	25.7441	43.5064	53.4141	57.482	37.1044	35.8413	18.5078	22.2264	23.449	29.5244	22.7714	21.9919	22.0162	27.2736	25.1443	27.4878	21.2647
cra_locus_110179_iso_1_len_348_ver_3	Gene of unknown function	2.71372	0	0	0	0	2.31286	0	0	7.28478	5.03951	0	0	0	0	3.60748	2.43119	7.14134	5.86166	10.8671	5.68245	6.18949	0	0
cra_locus_11017_iso_4_len_1376_ver_3	Gene of unknown function	2.81168	3.76238	3.54564	5.11039	2.36699	2.73869	2.58344	1.58173	2.03327	2.38694	3.36172	3.97257	4.25336	3.6291	2.95426	3.14454	4.22807	1.82987	4.87905	1.6341	1.38438	1.61456	2.24414
cra_locus_110181_iso_1_len_259_ver_3	Gene of unknown function	3.29333	5.84045	7.82455	8.02579	0	4.27712	3.02599	5.67759	6.85607	8.0649	6.15249	11.2316	0	3.36709	3.02066	3.11257	5.3061	0	3.76803	11.259	12.3999	6.87689	5.17749
cra_locus_11018_iso_3_len_1678_ver_3	Lipoamide acyltransferase component of branched-chain alpha-keto acid dehydrogenase	37.2401	162.405	175.079	195.06	31.1374	36.1668	25.605	122.578	76.5522	107.164	240.622	187.093	28.5672	33.4427	23.2889	27.0612	23.8308	21.8542	21.9421	35.8834	51.8191	41.1248	77.492
cra_locus_110190_iso_1_len_1457_ver_3	Gene of unknown function	0	32.582	39.2134	34.148	0	0	0	32.2466	105.661	103.744	23.9809	34.8235	0	0	0	0	0	0	0	0	0	0	0
cra_locus_11019_iso_1_len_1499_ver_3	Conserved gene of unknown function	6.99313	29.2005	30.512	30.1377	20.2886	21.7075	22.8836	28.4733	30.5442	26.8775	29.6973	32.1967	7.16941	10.2687	13.6471	8.3196	10.7927	18.1552	11.9385	11.0982	11.79	13.8532	10.3441
cra_locus_1101_iso_1_len_1584_ver_3	EMB1923	7.41113	11.6621	8.05679	8.95267	18.1971	14.9459	20.2154	10.2099	9.92731	12.1276	8.19013	8.00967	9.68867	15.1868	7.92924	11.663	4.23806	4.91928	3.9942	3.99677	6.27816	5.53081	4.5359
cra_locus_11020_iso_1_len_3080_ver_3	Coiled-coil domain-containing protein	17.6802	1.30084	1.29314	0.882328	1.21918	0.967294	1.06454	1.71202	2.36661	2.06711	1.18271	1.30028	3.12973	4.60128	0.520633	2.99168	0.720002	1.33717	0.402409	0	0	0.550816	0
cra_locus_110211_iso_1_len_346_ver_3	Esterase/lipase/thioesterase family protein	0	86.0993	85.5934	73.0317	0	0	0	76.317	68.0712	79.7755	89.9486	82.0731	0	0	0	0	0	0	0	0	0	0	0
cra_locus_11021_iso_1_len_957_ver_3	Gene of unknown function	6.23837	6.31648	14.0224	8.12236	15.8186	39.5536	8.43724	9.10951	6.08149	6.26304	13.0376	17.6963	35.1372	76.8617	21.0473	13.243	4.55898	5.03737	6.38157	14.9291	14.3024	11.2917	14.905
cra_locus_110224_iso_1_len_557_ver_3	Gene of unknown function	0	15.2648	10.8807	12.2363	0	0	0	10.6738	12.2605	13.1156	14.6063	14.3282	0	0	0	0	0	0	0	0	0	0	0
cra_locus_110226_iso_1_len_297_ver_3	Gene of unknown function	4.44143	6.60716	5.42373	5.45285	3.9656	3.90008	4.54464	0	0	4.38353	5.80813	0	3.95887	2.26332	2.36886	4.00686	0	3.80571	4.0422	0	0	0	0
cra_locus_11022_iso_2_len_1050_ver_3	Nbs-lrr resistance protein	0	0	0	0	0	0	0.96569	0.807621	1.25986	1.69566	0	0	0	0	4.40389	0	0	0	0	0	0	0	0.897176
cra_locus_110231_iso_1_len_575_ver_3	Gene of unknown function	0	89.3523	69.4707	98.3257	0	0	0	86.9808	122.972	149.142	72.1791	112.029	0	0	0	0	0	0	0	0	0	0	0
cra_locus_11023_iso_5_len_2652_ver_3	RECQSIM (Arabidopsis RecQ helicase sim); ATP-dependent helicase	10.1485	8.63629	8.02212	8.2104	6.6601	6.63357	7.1862	10.0879	11.0427	11.3384	10.8437	9.14505	3.12806	5.29151	7.65838	6.48205	9.52253	8.36008	12.5003	8.58913	8.07109	8.89434	7.01942
cra_locus_110243_iso_1_len_302_ver_3	Gene of unknown function	4.95464	6.48615	8.11337	7.04339	4.25765	6.30601	4.71754	5.79033	3.04009	3.62379	8.55263	9.80046	4.66364	7.06712	7.81934	4.80757	10.7288	9.65135	4.7618	0	0	3.62107	0
cra_locus_11024_iso_6_len_1343_ver_3	Desacetoxyvindoline 4-hydroxylase	28.9876	58.55	62.0004	56.9537	10.2113	29.2913	10.5491	39.7517	34.1073	42.9146	59.8767	50.483	14.4801	10.0869	44.5657	21.8381	15.6652	20.2459	19.1819	9.85379	56.8492	8.04986	58.2096
cra_locus_11025_iso_3_len_1782_ver_3	Conserved gene of unknown function	13.1172	15.6044	12.0429	16.7605	7.9951	7.22511	8.20511	9.9192	11.1259	12.8035	19.1717	15.8941	7.62596	6.90355	9.75278	10.0394	8.21492	7.85456	6.96252	7.97701	9.26089	8.5716	11.0779
cra_locus_110261_iso_1_len_323_ver_3	Calcineurin-like phosphoesterase family protein	2.66777	16.5087	11.7694	20.6648	2.59794	3.24123	2.95862	24.0751	30.6266	40.6891	19.4922	24.9421	2.52528	1.30938	1.86015	2.73914	2.62866	4.62004	0	0	0	0	0
cra_locus_11026_iso_3_len_1491_ver_3	Grave disease carrier protein	41.0781	63.8575	107.85	97.6942	31.5762	32.3485	28.0073	43.2022	50.9207	53.4148	84.9334	99.2642	58.6368	58.4965	49.7958	34.2358	28.8823	42.6133	28.4042	33.3882	36.0136	37.4933	34.2096
cra_locus_110273_iso_1_len_326_ver_3	Gene of unknown function	2.18605	5.55084	4.66109	6.99217	3.80203	0	0	3.93396	19.0021	12.6993	4.04987	6.21276	0	3.52111	2.90946	2.61128	3.01334	0	4.13384	0	0	0	0
cra_locus_11027_iso_6_len_2713_ver_3	Conserved gene of unknown function	15.2598	4.43612	3.71359	3.63936	12.2503	12.0951	12.2306	3.71299	5.7824	4.60737	3.2688	3.47176	22.4529	26.1379	8.0971	11.9804	11.2158	7.0934	9.22939	7.81504	4.65903	10.2023	5.73364
cra_locus_110280_iso_1_len_313_ver_3	Gene of unknown function	3.42917	4.72994	2.43722	6.22894	0	3.68036	3.88016	0	0	2.17714	3.98612	4.87286	7.96978	4.26705	5.27804	2.94087	5.15663	3.29203	5.08596	0	0	0	0
cra_locus_110289_iso_1_len_296_ver_3	Gene of unknown function	4.66071	3.20161	0	4.60907	0	2.99358	3.25833	2.57411	5.59513	4.8631	3.17994	0	2.64913	4.33738	3.67495	2.23437	3.65664	0	5.68028	0	0	0	0
cra_locus_11028_iso_1_len_966_ver_3	Hydrolase, acting on ester bonds	10.4514	6.71196	11.0807	7.96226	20.7707	16.8637	13.7413	9.24206	7.52885	5.21306	6.04086	7.08931	22.0424	23.5732	4.0108	7.44924	6.77278	11.7921	7.78473	4.83645	2.92667	3.90357	2.34625
cra_locus_11029_iso_1_len_1258_ver_3	UDP-glucosyltransferase	0.52828	0	0	0	1.7295	1.25068	1.55732	0	0	0	0	0	1.78412	0.928426	0.601541	0.582499	0	0	0	0	0	0	0
cra_locus_1102_iso_4_len_1337_ver_3	24 kDa seed maturation protein	145.768	98.124	68.7139	67.7698	155.978	148.396	243.033	133.279	126.902	104.729	72.2135	63.9392	130.647	156.215	223.571	249.051	148.724	162.775	164.345	197.781	167.387	200.996	158.586
cra_locus_110308_iso_1_len_419_ver_3	Meiotic checkpoint regulator cut4	0	5.47968	6.38928	6.31088	3.9173	3.15301	3.71783	5.28682	5.95858	6.81725	2.72129	3.07532	2.35773	2.95167	3.53064	2.75343	4.17232	3.05107	4.07399	0	0	0	0
cra_locus_11030_iso_4_len_1983_ver_3	WD-repeat protein	10.2173	28.186	26.8154	28.6951	18.7306	13.719	15.6126	29.229	24.3377	20.8845	23.7535	26.1575	17.1581	16.8256	19.1794	20.9138	14.948	17.2685	17.5192	16.2345	14.1465	17.0493	11.251
cra_locus_11031_iso_1_len_1227_ver_3	Beta-1,3-glucanase	0	0.66258	1.03999	1.34824	0	0	0	1.49161	2.21688	1.85802	0.649658	0.924136	0	26.7168	0	0	0	0	0	0	0	0	0
cra_locus_110324_iso_1_len_359_ver_3	C2 domain-containing protein	8.36164	7.40112	12.7947	12.3528	0	0	0	21.0351	15.5929	25.2945	12.8643	15.3766	0	0	0	0	0	0	0	0	0	0	0
cra_locus_110334_iso_1_len_335_ver_3	Gene of unknown function	0	5.18804	5.4288	3.51893	0	0	0	4.04286	4.06836	7.47628	12.9484	6.93454	0	0	0	0	0	3.88862	8.49655	0	0	0	0
cra_locus_110349_iso_1_len_310_ver_3	Gene of unknown function	0	10.6473	3.94119	0	0	2.84444	4.33439	8.8051	0	7.26128	34.9991	15.103	0	0	0	0	0	0	0	0	0	0	0
cra_locus_110353_iso_1_len_345_ver_3	Gene of unknown function	3.42435	8.3087	5.91412	9.00573	3.15303	3.6968	5.50616	10.4398	5.7781	8.4137	9.62787	10.8025	9.6249	4.002	5.82764	4.53096	6.17926	0	8.68476	0	0	0	0
cra_locus_11036_iso_6_len_2208_ver_3	Electron carrier/ protein disulfide oxidoreductase	9.70856	11.1807	8.73553	8.25968	19.2047	15.8576	12.6164	7.50685	9.52208	9.67615	7.14355	7.91764	20.5476	16.4781	5.18438	9.06226	9.48393	7.87922	9.64489	7.07112	5.58777	4.5821	4.96053
cra_locus_110374_iso_1_len_290_ver_3	Gene of unknown function	0	0	0	0	0	4.00468	0	0	0	0	0	0	0	0	0	0	0	3.25648	32.9282	12.4022	12.6082	0	0
cra_locus_11037_iso_1_len_2197_ver_3	RNA-binding protein nob1	32.343	57.2853	66.9184	70.7408	38.4817	37.2929	34.8578	57.1576	39.5832	49.8241	49.9648	75.0247	28.0904	36.7765	45.8231	39.8176	27.0575	32.6569	35.0777	43.4184	29.2443	38.2107	22.0131
cra_locus_11038_iso_2_len_935_ver_3	Conserved gene of unknown function	20.7819	18.803	16.7313	16.2147	16.4227	20.3588	28.1029	16.9925	25.7411	23.9544	17.5713	15.1729	15.2237	12.4324	12.5721	18.2397	13.56	13.0399	21.6821	13.4338	29.4206	18.549	40.5433
cra_locus_110390_iso_1_len_300_ver_3	Gene of unknown function	4.19262	4.28091	11.2382	13.6231	0	0	0	5.83306	3.67503	4.10685	8.35467	10.2132	0	0	4.04553	2.64167	0	0	17.8553	0	0	0	0
cra_locus_11039_iso_6_len_1582_ver_3	DNAJ heat shock N-terminal domain-containing protein	24.0388	87.441	142.847	86.5219	100.726	98.2629	12.0627	94.6181	48.6851	51.5191	115.493	81.9227	58.89	72.117	53.8567	26.5828	49.9792	81.4915	42.7371	40.8529	45.9108	57.4163	38.9882
cra_locus_1103_iso_2_len_2400_ver_3	Amine oxidase [copper-containing]	17.0689	21.0141	15.9395	14.8248	34.7107	36.2263	37.8419	27.219	22.6826	29.442	34.019	27.3549	15.9602	21.7508	43.1363	32.7853	35.9275	36.9945	29.8813	20.3693	24.5661	25.85	23.7987
cra_locus_11040_iso_1_len_2101_ver_3	O-linked n-acetylglucosamine transferase, ogt	9.766	13.4967	8.85258	10.3195	11.4446	10.1187	17.9705	15.4573	19.2666	19.5161	9.45886	11.1762	8.84148	11.5977	12.577	11.92	9.93443	11.1986	10.7704	11.1232	8.20569	12.6432	7.604
cra_locus_110414_iso_1_len_401_ver_3	Gene of unknown function	1.45443	5.74482	4.27955	6.40948	2.67838	1.81806	3.43	0	2.45414	2.82561	3.80396	3.72014	2.47181	3.83369	6.48166	5.13184	4.59292	4.3411	4.85354	0	0	0	0
cra_locus_110418_iso_1_len_396_ver_3	Gene of unknown function	0	5.49034	4.90367	13.4128	0	0	0	0	4.749	3.36953	4.04857	4.2736	0	0	2.1904	2.76343	0	0	0	0	0	0	0
cra_locus_110419_iso_1_len_281_ver_3	Gene of unknown function	2.57641	4.60367	8.78948	8.85119	0	3.65974	0	7.63652	0	2.94433	6.1769	8.78662	0	5.47712	5.73253	0	8.39431	4.04734	3.72567	0	0	0	0
cra_locus_11041_iso_1_len_638_ver_3	Syntaxin, plant	1.15494	0	0	0	9.05283	5.95654	3.33323	0	0	0	0	0	9.05925	27.3258	17.8164	5.3878	29.9256	2.79127	27.0383	16.7961	9.72634	17.2063	21.6595
cra_locus_11042_iso_2_len_1472_ver_3	STA1-12	3.52449	1.56562	1.19919	1.70564	3.45238	2.42867	2.73311	3.6198	1.32285	1.54256	2.20645	1.21478	2.45086	22.8799	2.5601	3.10071	2.5936	2.65054	1.80176	1.43566	3.57277	2.53475	5.0784
cra_locus_11043_iso_6_len_2515_ver_3	Plasmalemma Na+/H+ antiporter	40.35	22.7683	16.6221	19.4296	28.8032	30.2966	31.0055	25.4069	26.0067	24.2747	11.4128	17.4425	21.339	22.9019	46.4331	33.1885	60.1202	47.4545	50.5487	51.2498	32.5633	53.0065	35.1152
cra_locus_110441_iso_1_len_301_ver_3	Gene of unknown function	2.58589	4.48965	7.37977	5.37266	0	4.97294	0	5.55894	4.27178	0	4.94235	5.08784	4.16069	2.83744	5.9395	3.94793	11.3665	6.24957	9.55862	0	6.85572	3.99783	6.06187
cra_locus_110447_iso_1_len_334_ver_3	Ubiquitin ligase protein cop1	11.3531	11.0107	12.9357	17.9045	9.80023	6.45074	6.84569	10.1403	9.79607	7.90625	12.0629	12.7046	26.6694	10.6424	5.66374	14.0831	6.93562	5.57339	3.31505	0	6.11395	3.56527	3.00333
cra_locus_11044_iso_4_len_1724_ver_3	Histone deacetylase	19.5671	26.369	23.7258	29.3588	15.8712	14.8721	11.497	27.6131	35.695	35.8948	20.0364	25.419	13.5621	16.2982	26.1739	17.2462	19.3921	22.264	19.3015	26.4305	19.9321	21.2291	17.5097
cra_locus_11045_iso_1_len_2237_ver_3	Pathogen-inducible alpha-dioxygenase	11.1983	0	0	0	9.83722	78.5253	14.3682	0	0	0	0	0	16.1773	9.13772	85.7145	1.2969	83.4605	49.8879	107.448	73.1836	76.1084	66.7094	215.065
cra_locus_110460_iso_1_len_384_ver_3	LRR receptor-like serine/threonine-protein kinase GSO1	0	0	0	0	6.54882	4.32983	12.4165	0	0	0	0	0	0	2.62839	10.5184	2.0166	42.8574	10.2951	49.4356	25.531	0	23.6696	3.61246
cra_locus_110461_iso_1_len_463_ver_3	LOB domain-containing protein	0	4.64276	14.5133	4.2533	11.4788	6.9417	0	3.32558	3.6334	7.12338	51.5165	27.8479	0	0	9.76962	3.57396	3.37439	3.72094	9.65161	6.86178	6.31863	2.9611	2.53276
cra_locus_11046_iso_3_len_862_ver_3	Conserved gene of unknown function	18.3164	6.59704	2.57591	3.32401	36.7603	31.2954	53.194	9.48835	19.3288	19.7443	3.39753	4.54099	37.7859	52.6761	25.9246	56.3632	37.3104	14.2847	31.3852	34.3515	7.37422	35.1275	7.58765
cra_locus_11047_iso_1_len_291_ver_3	Gene of unknown function	0	0	0	0	3.04231	0	0	0	0	0	0	0	0	4.84288	0	0	3.41589	0	3.30782	0	0	0	0
cra_locus_11049_iso_1_len_355_ver_3	Ac-like transposase	7.63441	12.1744	9.55451	12.2685	4.27883	4.9036	9.07334	4.84895	11.7109	12.7076	8.03032	13.3012	6.07512	5.22596	6.5283	6.03896	8.23585	3.91077	9.96911	0	5.72011	4.54856	5.61973
cra_locus_1104_iso_2_len_1314_ver_3	Choline/ethanolamine kinase	22.3777	17.2708	14.8928	20.1997	13.2584	12.6074	18.0758	17.0069	31.7117	34.2828	14.5354	18.1644	8.69633	10.9495	20.5522	14.8785	16.8723	23.1484	15.0892	18.8417	15.3224	22.1172	16.93
cra_locus_110503_iso_1_len_283_ver_3	Gene of unknown function	2.55613	3.12508	3.2701	3.63372	2.87662	0	3.19675	0	0	4.86857	0	0	4.73402	3.4772	2.72951	5.40207	0	0	0	0	0	0	0
cra_locus_110507_iso_1_len_257_ver_3	Gene of unknown function	4.74603	5.35608	6.07168	6.07214	2.91332	4.04497	4.07005	3.01441	4.36813	3.79663	4.65484	5.66506	0	4.12528	3.55571	6.01809	5.35265	0	3.48433	0	0	0	0
cra_locus_11050_iso_3_len_780_ver_3	Nucleic acid binding protein	98.4835	227.976	356.685	264.641	166.811	153.75	95.2221	261.645	155.711	183.434	260.639	318.056	95.0311	179.243	159.739	87.6197	135.528	213.108	167.329	136.892	102.096	113.466	89.0402
cra_locus_11051_iso_2_len_928_ver_3	Type-A response regulator	3.12953	3.87139	2.69477	3.93552	10.418	10.1903	18.9026	3.97541	7.10854	7.29041	3.38421	4.10498	5.8222	3.99499	32.3733	9.88764	57.7395	23.6357	58.4835	74.317	166.795	59.3792	108.414
cra_locus_110520_iso_1_len_624_ver_3	Gene of unknown function	1.36398	43.1007	44.3222	27.2753	2.1211	2.06668	0	25.8743	5.85843	11.9505	95.2498	81.5605	1.18877	0	0.959956	0	2.32458	2.28556	4.73379	0	0	0	0
cra_locus_11052_iso_3_len_2224_ver_3	LIGULELESS1 protein	4.28894	6.31456	4.22556	5.08087	2.69326	4.08957	2.29873	5.85524	7.10841	6.0845	2.25638	3.61472	5.28475	3.63231	14.043	4.70194	10.4156	7.47329	10.6275	11.5617	9.69483	12.295	8.72198
cra_locus_11053_iso_3_len_1329_ver_3	Zinc finger family protein	3.24628	198.865	252.43	168.915	40.3652	31.8769	17.7118	231.087	40.9227	108.252	312.404	332.418	31.2852	22.0634	51.2142	13.7213	11.0149	35.8283	16.8885	23.0074	37.042	15.7408	31.9197
cra_locus_11054_iso_2_len_973_ver_3	Conserved gene of unknown function	1.54749	9.31413	6.96571	10.266	15.1987	8.72754	23.0395	15.4348	20.1332	30.064	5.54636	4.59343	19.6311	22.1297	4.40312	8.46835	2.49941	1.71069	3.21321	3.15467	0	2.40855	2.13478
cra_locus_110556_iso_1_len_564_ver_3	Gene of unknown function	3.74182	12.326	13.3259	15.0952	0	1.14923	0	20.8113	19.081	21.2652	12.2992	12.5887	0	0	0	0	0	0	0	0	0	0	0
cra_locus_110559_iso_1_len_294_ver_3	Gene of unknown function	20.4169	26.4974	86.7173	55.7262	36.8464	32.4819	6.7847	52.3894	25.6813	25.6657	62.4768	72.0669	22.9545	27.057	59.2514	12.6069	41.4477	64.4673	51.7809	6.84039	4.96716	9.32597	10.0243
cra_locus_11055_iso_5_len_1792_ver_3	TCP domain I	13.1719	0	0	0	30.7064	19.1112	14.3104	0	0	0	0	0	42.2064	85.7574	21.9397	41.2832	7.42995	3.90501	4.629	4.84702	2.17751	6.16794	2.02636
cra_locus_11056_iso_3_len_1648_ver_3	FAD-dependent oxidoreductase	9.45746	7.09027	5.60065	7.07854	9.06711	8.54466	9.24246	5.30641	7.27932	5.11757	4.06429	6.43936	8.95616	9.3878	7.05336	8.88047	8.39231	8.24217	6.33436	6.07806	6.84301	6.89972	7.46845
cra_locus_11057_iso_4_len_3782_ver_3	Zinc finger CCCH domain-containing protein 65	5.57914	6.13358	7.87523	8.8124	4.88488	4.6854	4.01799	5.29245	4.6882	4.95899	3.95904	5.18699	5.69171	6.23725	5.80276	5.5477	6.30851	6.20527	5.67682	4.86451	2.98122	4.6359	2.83128
cra_locus_110591_iso_1_len_597_ver_3	Gene of unknown function	0	92.4489	102.79	102.913	0	0	0	77.8641	80.8027	112.123	87.9438	165.677	0	0	0	0	0	0	0	0	0	0	0
cra_locus_11059_iso_4_len_1537_ver_3	Dihydroorotase, mitochondrial	11.1223	22.3506	18.8649	23.7168	19.1167	15.167	18.4225	16.4529	29.1141	21.239	11.1667	15.9068	13.743	14.5456	18.3893	21.6002	12.0853	16.2323	12.6913	17.0005	15.4936	17.3062	11.6628
cra_locus_1105_iso_3_len_1846_ver_3	Succinic semialdehyde reductase isofom2	9.76684	12.5009	11.8473	12.1487	36.8127	24.7694	71.0853	14.5249	11.1451	9.22189	10.8253	11.8815	42.1588	53.666	7.25159	19.667	4.88072	5.3326	4.41194	3.91928	2.83737	6.47429	3.37772
cra_locus_11060_iso_3_len_1922_ver_3	Phospholipase D	7.717	6.80587	7.64204	7.39478	4.07034	4.02745	3.21702	7.73334	4.03354	5.74867	6.01761	7.55427	5.41791	5.93304	14.1593	18.0265	9.36953	10.0574	9.61416	8.96023	4.51978	10.2876	4.6938
cra_locus_11061_iso_1_len_1656_ver_3	Zinc finger, CCHC-type	1.99526	3.49017	4.84988	4.58552	2.57203	2.64527	1.88931	4.09753	6.58039	3.49628	2.73969	5.10348	6.1298	6.37223	4.67905	5.86676	2.45031	5.9031	2.397	1.11414	0	1.76202	0
cra_locus_110628_iso_1_len_424_ver_3	Gene of unknown function	0	0	4.90653	0	2.1861	3.26875	0	2.95794	0	0	2.86597	3.03639	5.0139	0	0	0	0	0	0	26.2235	32.2132	53.3068	24.5817
cra_locus_11062_iso_2_len_791_ver_3	UPF0497 membrane protein 14	0	0	0	0	4.00983	3.30817	4.034	0	0	0	0	0	0	3.00236	5.91064	4.22771	57.6568	28.2198	28.9072	19.8806	2.15928	28.8004	5.04891
cra_locus_110632_iso_1_len_606_ver_3	Pentatricopeptide repeat-containing protein	5.15729	3.06884	4.55849	5.33198	4.95013	3.30328	3.0155	4.76455	8.48644	5.7866	2.32984	3.67759	4.78083	6.62234	4.8518	2.7916	3.24313	2.65146	3.88014	0	2.47139	1.88459	1.74631
cra_locus_110638_iso_1_len_380_ver_3	Gene of unknown function	3.08289	16.1781	11.832	24.104	3.02786	2.45234	0	9.00717	14.66	12.8594	10.6836	21.8164	0	0	1.63692	2.20954	4.8677	3.39008	5.14392	0	0	0	0
cra_locus_11063_iso_2_len_1688_ver_3	Conserved gene of unknown function	6.94654	5.18949	6.13316	5.4243	7.72742	6.00382	6.71227	5.59275	8.75469	7.19311	4.22219	5.00504	9.67819	7.91752	5.58156	6.6526	5.83596	4.86705	5.44158	6.39979	5.15729	5.42244	5.63193
cra_locus_11064_iso_2_len_1708_ver_3	MRNA, clone: RTFL01-48-D04	10.0056	7.94603	6.59604	8.54338	5.93413	5.29143	2.52158	5.79215	5.26433	4.86095	3.77151	5.60481	11.8378	8.27549	13.6349	10.8016	7.38972	8.04888	5.72087	2.39061	3.10317	4.06255	4.14635
cra_locus_110654_iso_1_len_375_ver_3	Gene of unknown function	2.42358	42.3482	51.5078	20.8914	0	2.75411	0	62.5657	19.3057	35.8257	50.5057	45.7276	1.94133	0	0	2.06905	0	0	9.9751	6.73589	12.8392	0	0
cra_locus_11065_iso_1_len_799_ver_3	Chromosome 11 contig 1, DNA sequence.	10.1885	6.8989	10.6073	8.98993	25.8794	26.3501	10.0179	10.2647	17.3534	12.7677	9.00501	11.5025	25.6288	40.108	12.8822	16.7351	6.65674	4.52566	6.19034	3.02678	3.2765	3.08121	3.44993
cra_locus_11066_iso_5_len_3875_ver_3	Leucine-rich repeat-containing protein	28.8249	57.6142	19.5089	20.0184	20.3105	19.5833	16.739	57.1309	17.3067	15.8677	20.4755	23.5806	22.4554	17.3852	42.6734	26.5404	42.034	36.6186	48.3161	41.207	22.3092	34.5711	18.0536
cra_locus_110671_iso_2_len_340_ver_3	Gene of unknown function	3.4794	3.92664	3.33845	5.19354	0	4.15163	4.47575	0	3.20236	2.78338	3.41255	7.11971	10.9168	6.36635	0	3.26103	0	0	0	0	0	0	0
cra_locus_110674_iso_1_len_426_ver_3	Gene of unknown function	0	10.3047	10.2867	9.68688	0	0	0	6.9248	14.0066	16.6648	5.34662	5.34501	0	0	0	0	0	0	0	0	0	0	0
cra_locus_11067_iso_1_len_2352_ver_3	RhoGAP1	18.5628	6.70259	5.8997	6.19151	17.1564	11.9897	14.9053	8.49123	9.11046	8.99649	7.27943	5.16304	32.6712	34.8776	10.8241	15.5629	7.91537	6.87856	6.00025	8.58361	8.26346	10.9366	8.28082
cra_locus_110685_iso_1_len_320_ver_3	Gene of unknown function	3.71854	11.3306	10.228	12.1582	5.70651	5.2821	3.78682	9.44724	9.12654	12.9611	12.157	18.7055	3.64597	2.45973	0	3.07514	4.753	4.67322	6.45271	0	0	0	0
cra_locus_11068_iso_2_len_1524_ver_3	Uridylate kinase	17.2628	28.8347	24.3996	26.5468	30.746	22.5783	44.2648	24.917	28.0349	26.2213	22.2436	25.3019	29.8067	32.2505	11.4795	16.5605	11.102	10.404	9.95148	12.0385	11.1526	13.2248	10.6613
cra_locus_110693_iso_1_len_390_ver_3	Gene of unknown function	0	2.70623	3.0678	2.13058	3.67999	1.87346	2.08858	9.89997	3.67843	6.16596	0	2.55567	0	2.58409	2.06822	3.30513	2.70449	0	2.60074	0	0	0	0
cra_locus_110704_iso_1_len_362_ver_3	Gene of unknown function	2.59963	7.70117	6.6515	8.08403	2.39365	2.40026	3.65754	4.33424	6.23082	9.65528	7.64904	8.31167	0	2.47472	5.00757	3.04558	5.13082	0	4.77134	0	0	0	0
cra_locus_11070_iso_5_len_2043_ver_3	Light-regulated protein	50.9885	59.6647	88.1539	68.9322	227.14	108.008	36.8032	84.2557	98.489	95.7243	101.563	117.638	368.866	161.642	33.9994	29.266	68.2715	61.1924	77.8506	56.6389	45.2055	44.4702	38.7511
cra_locus_110718_iso_1_len_326_ver_3	Gene of unknown function	4.91861	6.98995	3.72887	6.47423	2.23649	3.10523	1.9528	0	0	4.1637	3.57341	3.41702	3.81047	2.77983	1.93964	3.41475	5.20486	4.29263	5.59285	0	0	0	0
cra_locus_11071_iso_1_len_709_ver_3	Conserved gene of unknown function	11.6962	6.37531	14.3524	9.04868	23.5414	23.8701	7.93211	15.9693	4.39383	4.81917	14.5669	15.6027	16.6428	22.8481	18.963	9.73823	18.0668	21.6235	18.6924	7.80681	4.51671	10.7578	6.73542
cra_locus_110725_iso_1_len_355_ver_3	Gene of unknown function	0	0	0	0	14.059	15.4652	2.84654	0	0	0	0	0	0	18.2066	3.70525	3.65998	3.24443	0	3.1015	0	0	0	0
cra_locus_11072_iso_8_len_3234_ver_3	AAA-type ATPase family protein	18.5864	26.024	26.9094	22.4622	33.616	31.9791	33.9122	36.8411	25.5587	24.0764	24.6368	22.5683	40.7398	51.7296	12.7788	18.6884	15.4343	17.4231	16.1792	18.5835	17.3864	15.0211	13.09
cra_locus_11073_iso_1_len_1918_ver_3	Calmodulin binding protein	10.5689	0.646472	0.806129	0.692184	11.2171	7.55119	10.7768	0.545754	0.702971	0.425517	0.636745	0.488404	15.4269	13.2125	6.07259	5.87418	3.10108	1.21484	3.82322	3.70135	5.74879	8.26847	12.7049
cra_locus_110743_iso_1_len_376_ver_3	Gene of unknown function	0	1.75963	2.9921	3.54646	2.29708	2.48061	4.67997	0	2.39177	2.85099	0	0	4.2806	1.89874	3.14652	3.6104	7.97189	3.42916	10.1983	5.22393	0	3.70351	0
cra_locus_110744_iso_1_len_320_ver_3	Gene of unknown function	0	12.1699	14.5094	28.281	0	0	0	10.1558	10.8378	5.73689	18.9649	11.7306	0	0	0	0	0	0	0	0	0	0	0
cra_locus_11074_iso_3_len_2913_ver_3	Conserved gene of unknown function	9.88668	15.0954	13.0802	15.5214	8.15326	6.94995	7.01851	13.0117	9.72682	15.0718	12.7818	16.7308	8.04439	5.7516	8.77398	9.76366	11.2561	11.0811	10.6428	10.1464	12.3232	8.53501	10.7038
cra_locus_11075_iso_3_len_2014_ver_3	Chloroplast tocopherol cyclase	17.7442	47.1248	58.9653	44.4434	33.4629	29.89	20.7157	59.6918	38.0897	31.772	52.5395	54.9839	29.3261	34.6548	12.7005	10.3086	9.79602	12.8026	8.18622	6.13149	7.07331	6.22515	5.9991
cra_locus_110764_iso_1_len_284_ver_3	Gene of unknown function	0	3.35227	2.98584	0	3.90728	3.13446	2.95677	0	0	0	0	0	0	2.38101	5.21064	3.27532	3.1906	0	3.1154	0	0	0	3.95144
cra_locus_11076_iso_2_len_1365_ver_3	Prenyl-dependent CAAX protease	1.82239	3.29062	2.07237	2.24524	2.23733	1.51868	2.5613	1.6462	3.1682	2.36031	1.80062	2.55509	5.13547	3.25253	3.53186	3.88489	2.49683	1.08151	2.59475	1.2599	1.39578	1.62786	1.43985
cra_locus_11077_iso_1_len_1842_ver_3	2,3-bisphosphoglycerate-independent phosphoglycerate mutase	0	3.87304	3.09244	1.9939	0.622837	1.52607	0.607813	10.4628	9.10971	16.6769	3.08303	3.10415	0	0.628536	2.22415	0.855542	1.79504	3.89107	1.03571	0	3.08564	0.926939	2.07152
cra_locus_11078_iso_2_len_1500_ver_3	ABC transporter family protein	29.2408	9.13191	13.5987	7.94759	46.6005	37.2413	27.9543	14.811	14.4436	12.7781	12.5057	13.8609	18.4162	42.6341	56.9851	33.9858	43.5285	53.793	34.8093	26.3182	12.2294	32.1229	11.6448
cra_locus_110790_iso_2_len_530_ver_3	Auxin-induced protein 5NG4	4.10375	33.8797	15.8183	12.3579	5.70073	16.1987	16.1488	16.2554	11.2647	6.9728	9.81495	5.52409	0	1.36363	31.7433	8.8711	92.3966	64.8865	64.9384	57.887	74.4372	31.5696	82.8163
cra_locus_110796_iso_1_len_473_ver_3	Auxin-induced protein 5NG4	3.77758	27.3667	19.7986	10.567	6.28333	25.2027	11.887	28.7917	9.53315	4.87406	19.4413	7.06492	1.59306	5.91679	73.0222	8.46493	174.265	138.594	91.9024	50.45	59.2927	32.0612	97.3783
cra_locus_11079_iso_5_len_1891_ver_3	Pentatricopeptide repeat-containing protein	6.59601	9.57535	11.1892	16.6468	4.85158	4.39169	3.58206	5.86888	9.09284	7.60434	7.40975	12.2881	4.6724	4.37108	7.47235	4.96613	5.24341	5.88842	7.17552	4.4504	6.6569	3.504	6.34619
cra_locus_1107_iso_2_len_1058_ver_3	Upf2	55.8398	39.0447	30.7408	25.7874	66.8111	65.9052	124.169	36.9358	27.1002	33.1087	37.0614	23.5804	43.3052	43.5977	49.5577	67.1366	52.9751	62.2795	57.3414	79.3985	76.0059	89.5366	78.9608
cra_locus_11080_iso_2_len_2190_ver_3	Conserved gene of unknown function	6.5847	7.77015	6.18182	6.08619	11.4344	22.1352	26.9728	5.75654	9.83183	11.9885	7.00661	3.41544	9.52474	10.6923	19.2819	14.8523	8.80994	7.94485	9.39103	5.75195	19.0856	10.7044	20.2193
cra_locus_110813_iso_1_len_346_ver_3	Gene of unknown function	6.65642	0	0	0	0	2.32745	0	3.25214	0	44.8615	33.4796	0	0	0	0	0	0	0	0	0	0	0	0
cra_locus_110820_iso_1_len_287_ver_3	Gene of unknown function	4.40387	11.5965	22.2675	13.4152	7.98115	7.14926	3.14719	10.6556	11.2589	7.9086	18.9225	30.038	4.66062	2.56667	5.14885	2.31231	4.09955	4.61209	3.07918	0	0	0	0
cra_locus_11082_iso_1_len_569_ver_3	Gene of unknown function	1.20233	2.93989	3.97358	3.41839	1.35308	0	0	3.81826	0	2.06103	3.79973	3.07532	0	0	0	0	2.10934	2.20355	9.36194	6.71371	3.04699	0	0
cra_locus_110833_iso_1_len_284_ver_3	Gene of unknown function	7.00179	4.78896	4.61448	3.61947	5.47019	5.78669	5.00377	3.50381	6.1839	5.09196	2.77465	3.97982	9.43091	8.00886	12.4602	7.95435	5.74307	4.66634	8.77977	9.13968	4.73179	0	4.66989
cra_locus_11083_iso_1_len_1239_ver_3	Calcium/calmodulin protein kinase	34.7433	103.649	106.915	65.2814	29.4241	40.5487	17.4953	145.012	29.4253	42.3107	47.5979	113.456	9.11914	7.9936	73.9341	34.5127	95.0771	165.774	87.202	225.486	98.9037	88.3162	133.996
cra_locus_110841_iso_1_len_306_ver_3	Aspartic proteinase nepenthesin-2	14.454	0	0	0	7.19391	2.44159	7.53767	0	0	0	0	0	10.98	24.4706	0	7.3226	0	0	0	0	0	0	0
cra_locus_110843_iso_1_len_421_ver_3	F-box/LRR-repeat protein 17	0	0	0	0	28.6368	21.6447	21.0096	4.90919	2.11721	2.05051	3.24889	0	3.24789	17.0592	3.95145	9.28346	18.057	8.45605	14.9231	11.8909	0	19.1658	8.4124
cra_locus_11084_iso_2_len_1940_ver_3	Kinesin-II 85 kDa subunit	70.8373	5.89501	5.14329	4.7895	27.2855	21.878	15.9336	8.55961	13.7021	14.6569	7.8862	7.77278	16.989	23.6216	5.49733	15.2032	7.96147	6.27115	10.9975	16.1933	6.19921	13.967	6.51901
cra_locus_110850_iso_1_len_314_ver_3	Tetratricopeptide-like helical	2.65778	3.85637	3.64301	7.28657	4.66132	3.88317	2.44203	4.58191	7.57143	5.20681	5.9582	6.47435	3.72273	3.86528	6.27057	6.6984	0	0	2.78746	0	0	0	0
cra_locus_11087_iso_1_len_2562_ver_3	Receptor protein kinase CLAVATA1	11.3848	20.5379	13.3898	9.01832	7.5261	20.7777	18.4321	33.1298	15.072	28.2425	26.3964	6.41045	6.33878	5.11599	21.4631	8.64364	23.255	18.6564	21.2414	23.4115	68.725	14.2058	56.9934
cra_locus_110888_iso_1_len_383_ver_3	Gene of unknown function	1.52838	4.13961	7.23456	10.6463	0	0	0	0	3.28227	2.27063	2.5983	4.95178	0	2.17076	0	0	0	0	0	0	0	0	0
cra_locus_110896_iso_1_len_348_ver_3	Gene of unknown function	4.5794	0	0	0	7.28787	6.36037	5.63619	0	0	0	0	0	2.43903	5.5148	2.52523	5.61043	16.5781	5.06235	13.8102	0	0	0	0
cra_locus_11089_iso_1_len_1816_ver_3	Transporter	0.878028	2.08428	3.13743	4.08887	1.70985	0.860151	2.40172	4.03834	5.57322	4.77485	1.70252	2.58141	1.10828	1.60945	1.81163	3.90596	1.54798	0.761	1.65699	3.18806	2.20979	1.05106	1.17898
cra_locus_1108_iso_3_len_2298_ver_3	Endosomal protein	99.1581	112.308	75.4083	78.9106	94.0131	102.046	140.686	136.864	106.128	100.129	81.4476	69.7316	61.5814	59.216	120.904	148.366	103.59	114.453	112.531	131.304	96.5168	132.206	83.8297
cra_locus_11090_iso_2_len_1411_ver_3	Rho GDP-dissociation inhibitor	37.3487	13.6522	16.3777	13.6909	48.1116	36.5698	49.1012	19.8428	20.1781	12.572	17.0484	13.0846	52.4603	69.8726	34.6323	38.117	49.3342	35.5475	38.0961	41.6918	13.0963	50.5006	14.7809
cra_locus_110916_iso_1_len_317_ver_3	Gene of unknown function	4.50873	15.0528	13.6992	21.8991	5.99659	5.97757	13.2913	16.9435	32.2756	47.2319	28.9893	28.8311	0	1.91215	0	3.10717	3.67251	0	2.50766	0	0	0	3.81674
cra_locus_110917_iso_1_len_340_ver_3	Gene of unknown function	0	1.96332	6.00921	2.72042	0	0	0	4.86183	0	4.5727	23.8879	12.1628	0	0	0	0	0	5.19257	3.25109	0	0	0	0
cra_locus_110921_iso_1_len_356_ver_3	Gene of unknown function	1.65458	2.05398	3.1751	4.23379	2.84383	2.4443	2.66047	2.31197	2.53806	2.83628	2.81283	0	3.67719	5.37778	6.68392	3.64878	4.72735	3.11905	3.53373	0	0	0	0
cra_locus_110924_iso_1_len_687_ver_3	Gene of unknown function	4.4402	2.41268	3.26099	2.10403	7.3692	6.07361	4.31901	6.78931	3.53168	4.9803	2.58068	2.66403	2.2574	4.14349	2.94896	5.16791	3.21484	9.55861	14.049	18.1034	19.6711	3.15496	5.15085
cra_locus_110925_iso_1_len_475_ver_3	Gene of unknown function	2.91146	5.33926	4.03508	6.5532	2.23398	3.44639	1.56049	4.623	4.65216	5.96127	3.96601	5.1715	4.75774	1.5952	2.82545	3.21028	2.55391	2.28684	3.23859	0	0	0	0
cra_locus_11092_iso_7_len_2159_ver_3	Gene of unknown function	3.55618	3.21063	5.52437	6.75253	1.93346	2.30924	1.52484	5.90486	9.03978	7.46035	3.35498	4.50469	2.2249	3.43783	2.47872	2.57676	2.7884	2.99275	2.71251	1.64128	1.08147	1.39233	0.86011
cra_locus_110930_iso_1_len_689_ver_3	Myosin XI	6.06629	0	0	0	5.13275	4.28522	2.02115	0	0	0	0	0	2.89357	3.30467	6.57167	10.1237	11.9575	3.0907	10.6142	8.23956	2.65919	5.99123	3.46976
cra_locus_11093_iso_1_len_1612_ver_3	Histone deacetylase	2.35832	0.385719	0	0	5.66469	4.03935	4.43322	0.694667	0	0	0	0	1.11705	2.22903	4.73773	6.29363	4.57426	4.13427	4.47102	4.08966	2.1481	4.12157	2.5461
cra_locus_11094_iso_1_len_3685_ver_3	Serine-threonine protein kinase, plant-type	5.12041	11.4737	7.38367	11.1921	8.55733	6.72687	4.94952	13.084	9.67058	8.45609	4.60595	7.21724	8.62866	6.31404	11.4485	12.0099	13.7529	9.95008	15.4871	15.9015	7.08074	16.2506	9.57107
cra_locus_110957_iso_1_len_387_ver_3	Gene of unknown function	0	147.531	153.322	153.828	0	0	0	34.5563	15.9961	11.9171	33.9934	107.722	0	0	0	0	0	0	0	0	0	0	0
cra_locus_11095_iso_1_len_1204_ver_3	Seed maturation protein PM36	6.95303	0	0	0	3.50491	3.29657	5.62706	0	0	1.10506	0	0	2.94967	1.34129	4.2115	1.16777	1.24637	0.723354	0.676108	0	0	0	0
cra_locus_110960_iso_1_len_366_ver_3	F-box and wd40 domain protein	4.0137	1.81185	0	0	1.97103	2.00688	1.72101	2.03943	5.41804	3.11907	0	3.01144	4.40762	2.11892	2.21773	3.54051	0	80.4544	0	0	0	0	0
cra_locus_110961_iso_1_len_653_ver_3	Gene of unknown function	0	25.6852	50.7472	31.1834	0	0	0	58.3191	43.5583	61.4336	43.6535	58.6231	0	0	0	0	0	0	1.44659	4.87596	6.7672	0	3.15597
cra_locus_11096_iso_1_len_2955_ver_3	Conserved gene of unknown function	25.9429	13.8354	14.2408	15.1146	19.069	20.0463	20.9515	11.7915	11.9414	13.9468	11.5102	14.1259	16.4622	14.9318	27.0099	24.385	22.7731	23.9936	20.363	23.5858	11.2841	21.4536	18.4393
cra_locus_11097_iso_3_len_1318_ver_3	TGACG-sequence-specific DNA-binding protein TGA-2.1	17.6708	33.6072	34.2854	28.4317	25.8676	36.7504	22.4512	29.458	27.8785	36.3106	40.9467	39.7942	12.3189	13.3805	52.4669	21.3817	62.7394	72.6301	41.8521	46.7567	37.9097	45.7442	39.8303
cra_locus_110983_iso_2_len_415_ver_3	Gene of unknown function	0	80.3578	74.776	60.1761	0	0	0	73.981	60.2033	74.8058	64.3381	105.644	0	0	0	0	0	0	0	0	0	0	0
cra_locus_110985_iso_1_len_302_ver_3	Gene of unknown function	7.53106	3.57857	4.56377	8.17033	15.5719	16.6659	7.64811	13.0912	6.08018	3.85028	8.81181	6.42099	6.99545	27.2589	7.81934	3.71494	6.25848	6.53801	4.7618	0	0	0	0
cra_locus_11098_iso_1_len_1693_ver_3	Gene of unknown function	9.07164	19.3562	17.8449	21.2853	4.07165	4.28612	2.50954	15.9431	21.9207	23.1679	13.2237	18.0748	2.16786	3.11502	10.1906	5.19853	11.0745	21.1208	11.1543	8.55929	4.68035	5.58438	2.36711
cra_locus_110996_iso_1_len_325_ver_3	Gene of unknown function	4.38687	3.91934	0	4.1575	4.26369	3.73887	3.72286	0	5.88812	5.01332	2.62936	0	7.16876	0	5.44965	5.03865	0	0	4.87977	6.12399	0	0	3.09465
cra_locus_110998_iso_1_len_373_ver_3	Gene of unknown function	0	8.5199	11.8715	8.27271	0	0	0	8.39129	6.75537	10.6047	6.58173	7.2413	0	0	0	0	0	0	0	0	0	0	0
cra_locus_11099_iso_4_len_933_ver_3	Glutathione s-transferase	0.897755	2.76928	4.05808	6.0408	3.74736	2.44846	3.40034	2.05274	0	0.68397	0	4.59257	1.48662	1.68542	14.8051	0.791915	3.87001	12.4106	7.42978	5.44269	2.06278	4.9209	1.51994
cra_locus_1109_iso_7_len_3588_ver_3	RNA recognition motif family protein	30.7693	29.4917	30.4952	29.5856	27.3049	22.51	20.8266	32.578	25.2785	26.4419	25.7647	30.2261	23.6104	29.0516	19.4103	25.7974	17.7397	21.7083	19.4198	15.0616	12.1434	17.3601	15.6487
cra_locus_110_iso_7_len_1959_ver_3	Chloroplast carbonic anhydrase	11.1013	13.0977	20.9803	11.0788	12.9062	10.9269	7.99353	20.583	6.88037	10.3799	11.0346	24.7141	25.0676	20.8585	14.4462	1.79282	13.9535	19.0246	13.9577	7.51379	10.7418	10.6026	10.3467
cra_locus_111002_iso_1_len_418_ver_3	Gene of unknown function	0	10.5166	7.29538	14.6314	0	0	0	9.0107	7.68072	9.06005	10.7313	8.30099	0	0	0	0	0	0	2.22789	0	0	0	0
cra_locus_111012_iso_1_len_296_ver_3	Gene of unknown function	0	0	0	0	9.20479	8.75047	21.2877	0	0	0	0	0	0	5.98971	2.37791	8.4906	5.48496	0	9.46713	5.33433	0	6.6644	0
cra_locus_111014_iso_1_len_558_ver_3	Death receptor interacting protein	5.01159	7.04086	9.42086	8.57829	9.16623	10.2279	6.90716	8.96461	7.06002	7.01296	8.42623	9.7666	5.34834	6.91915	7.45798	9.2475	6.6134	4.98075	10.6488	5.62951	3.93977	5.04555	5.54112
cra_locus_11101_iso_1_len_1215_ver_3	COL domain class transcription factor	6.38673	4.73647	6.4198	3.76138	0	1.03682	0	3.30315	3.21901	7.09022	4.8919	8.168	3.33978	6.36904	4.26819	1.81086	11.2505	16.4828	6.15033	5.45863	9.52633	6.00134	4.24797
cra_locus_11102_iso_2_len_1176_ver_3	Gene of unknown function	19.906	11.1259	15.509	10.3267	28.2026	24.6042	29.1255	12.3436	10.4919	10.404	16.1	12.5479	16.65	21.3707	29.6082	19.4004	23.1951	33.1233	19.2672	27.2052	20.5612	25.5972	19.4065
cra_locus_11103_iso_1_len_718_ver_3	Conserved gene of unknown function	164.906	111.041	136.124	67.8717	275.336	268.69	114.818	84.0904	34.0892	27.1912	42.3084	84.627	102.967	172.073	252.881	232.31	148.668	316.168	204.922	196.943	75.1442	150.794	117.128
cra_locus_111043_iso_1_len_423_ver_3	Gene of unknown function	7.41537	12.2428	0	7.22287	0	0	2.20805	0	13.06	14.9085	0	3.0441	2.87236	0	0	4.08821	0	0	0	0	0	0	0
cra_locus_11104_iso_1_len_2428_ver_3	Alpha-amylase	11.2991	9.36632	6.23214	4.84118	29.294	30.0883	24.2969	17.4185	25.0817	22.0364	5.07279	5.26868	15.9508	18.6031	14.739	14.9206	37.8822	26.3237	31.8505	21.211	15.729	26.2076	15.5788
cra_locus_111050_iso_1_len_338_ver_3	PLDP1 (PHOSPHOLIPASE D ZETA1); phospholipase D	0	0	0	0	0	0	0	0	0	0	0	0	0	0	0	0	11.5853	9.62717	35.526	6.28538	7.09977	0	0
cra_locus_11105_iso_1_len_1610_ver_3	Phosphoserine aminotransferase	98.1309	51.3073	41.8761	37.0459	104.761	191.761	112.273	97.2458	181.107	159.074	70.0599	32.4455	65.7655	104.914	221.716	148.917	490.167	501.846	268.851	236.638	610.824	192.206	381.698
cra_locus_111067_iso_1_len_572_ver_3	Ferritin heavy chain polypeptide 1	1.99281	2.92365	7.90325	3.54115	6.48335	6.22762	2.45665	5.18946	1.83413	2.50512	4.95145	6.96619	10.8117	0	0	4.6144	0	0	0	45.5441	43.0282	50.7931	26.8226
cra_locus_11106_iso_8_len_3619_ver_3	LvsC	26.1933	60.7701	49.6474	56.3892	30.2515	29.1833	30.647	54.5043	49.1263	55.9062	49.5867	50.6785	23.1504	23.8041	38.2006	37.4065	34.1078	32.2457	35.1045	32.6402	27.6826	31.3638	27.2509
cra_locus_11107_iso_1_len_970_ver_3	Pollen specific LIM domain protein 1a	112.522	0	0	0	0	0	0	0	0	0	0	0	0	0	0	0	0	0	0	0	0	0	0
cra_locus_11108_iso_4_len_734_ver_3	Chitinase	170.142	907.575	405.19	130.481	135.957	248.027	178.108	1575.3	222.496	143.132	773.974	429.759	40.3322	18.8626	60.3593	44.0028	120.021	317.432	169.232	125.255	120.272	119.888	233.747
cra_locus_11109_iso_3_len_1412_ver_3	Gene of unknown function	5.20313	5.96023	4.90476	4.89401	5.18711	5.46817	6.03886	6.26161	4.5608	4.82844	4.50204	4.66968	4.44951	5.14436	5.95967	6.08223	6.76531	5.71544	6.00533	3.65124	2.776	4.78909	3.24547
cra_locus_1110_iso_9_len_1036_ver_3	Conserved gene of unknown function	132.28	30.4993	28.6629	28.8713	77.7033	75.5876	45.9608	34.0572	44.5879	41.8141	27.6831	26.1112	93.6301	61.8368	91.7955	111.91	44.5179	84.3189	42.816	51.6886	44.1162	47.2189	49.6668
cra_locus_111105_iso_1_len_469_ver_3	DNA binding protein	2.45931	8.74258	10.0679	12.5859	2.11348	3.21392	6.45889	9.05969	20.1828	23.4676	20.4221	22.2262	0	1.6172	0	1.49144	0	0	1.96965	0	0	0	3.12278
cra_locus_11110_iso_2_len_1049_ver_3	40S ribosomal protein S12	38.5096	45.3454	36.7121	37.7029	63.0698	57.5955	78.3258	45.5157	28.6005	34.3101	37.9778	35.8635	31.5172	34.5738	40.175	44.6261	31.3472	28.7894	35.6499	70.8325	58.932	68.7625	51.683
cra_locus_11111_iso_5_len_2503_ver_3	Intron maturase, type II family protein	5.70789	5.97265	5.65152	5.5649	7.65189	6.43664	7.68933	6.19502	5.06555	5.09842	5.40519	5.22083	6.71866	8.65736	8.21231	8.22282	6.05104	7.18018	4.69989	4.71022	3.50268	4.39535	3.85068
cra_locus_111121_iso_1_len_336_ver_3	Gag-pol polyprotein	5.81582	2.38668	4.96019	4.76014	5.4091	6.40871	4.53406	2.91033	0	2.21544	2.76561	0	0	0	0	2.91487	9.80563	5.26022	0	0	0	10.6261	9.54806
cra_locus_11112_iso_1_len_903_ver_3	Plant-specific domain TIGR01570 family protein	1.67143	0	0	0	7.29597	5.69814	3.84885	1.33683	1.99415	1.62713	0	0	8.57846	17.8097	8.27727	9.07833	11.0776	3.88989	9.00693	5.9258	1.63157	4.63738	3.45864
cra_locus_111134_iso_2_len_555_ver_3	Gene of unknown function	7.81741	147.076	81.4552	135.111	0	5.14311	3.52841	96.8212	297.739	558.594	419.41	147.51	0	0	0	0	0	0	0	0	2.91955	0	0
cra_locus_111135_iso_1_len_359_ver_3	Gene of unknown function	0	8.51129	10.9069	10.0221	0	0	0	2.70749	3.77248	5.05889	10.5058	11.4625	0	0	0	0	0	0	0	0	0	0	0
cra_locus_11113_iso_5_len_964_ver_3	Activator of 90 kDa heat shock protein ATPase	66.8352	36.4396	44.9356	33.8092	60.5984	63.2591	51.2369	44.104	39.5888	45.2324	52.3652	40.9494	34.1177	52.4265	63.4582	48.3641	81.7953	95.1753	84.9655	78.5181	72.15	74.8552	67.991
cra_locus_111149_iso_1_len_295_ver_3	Gene of unknown function	13.2211	7.57502	13.271	20.8188	16.4811	16.411	9.37565	13.4357	9.36028	9.53033	13.5655	19.7699	9.83863	12.6473	22.3512	8.07396	20.1871	30.0355	9.77423	0	4.94849	7.80437	8.26481
cra_locus_11114_iso_3_len_2353_ver_3	Kinase	25.2364	16.4997	23.3504	21.9754	13.5191	12.8311	7.03765	29.5143	9.74935	15.777	44.8147	29.9724	7.9132	6.88384	15.3133	7.39303	16.6641	25.8201	22.903	15.8227	23.4109	14.9729	24.6347
cra_locus_11115_iso_4_len_1457_ver_3	Patatin 3	103.132	0.641379	0.727071	0.915641	8.09365	17.3945	85.7382	1.01072	1.39487	1.94845	0	0	4.11116	3.30844	0	0.835541	0	0	0	0	0	0	0
cra_locus_11116_iso_3_len_1069_ver_3	Protein kinase atmrk1	11.7053	16.6152	24.0929	26.1803	7.85589	8.09928	2.95568	20.7508	22.1053	32.1045	55.5824	45.9523	0.748125	0.993396	6.62138	0	14.0033	35.7956	8.12483	2.98797	9.49253	5.79825	17.6157
cra_locus_11117_iso_1_len_5174_ver_3	Nucleotidyltransferase	20.3905	17.2082	14.7986	16.8328	17.0804	14.9855	22.0269	13.6923	17.5506	17.2574	13.8757	16.4435	15.095	15.9605	18.9746	20.3381	13.1568	15.6277	13.9248	12.4571	12.4722	14.1222	15.1334
cra_locus_111186_iso_1_len_374_ver_3	Gene of unknown function	2.82285	7.4333	6.21951	6.9111	5.00585	4.63355	3.69844	3.98427	5.77353	7.1688	6.56265	7.75515	0	2.86486	6.66322	5.8793	6.60315	0	9.00142	0	4.1333	5.44421	3.71717
cra_locus_11118_iso_1_len_2190_ver_3	Phosphoribosylaminoimidazolecarboxamide formyltransferase/IMP cyclohydrolase	20.7556	55.2387	41.9915	45.949	34.3953	35.166	41.5998	59.8553	91.5973	68.9553	38.3726	42.9704	19.1477	27.7598	28.0035	26.5574	19.8788	21.3567	20.9878	28.2205	28.7807	27.7216	24.7549
cra_locus_11119_iso_1_len_2224_ver_3	Leucine-rich repeat receptor kinase	14.0007	4.64551	5.61305	5.74664	12.4374	13.8653	14.5326	4.28967	10.6626	8.42252	4.22265	3.36253	18.1099	22.1151	18.336	16.1171	9.526	4.84021	7.17271	8.02237	16.2413	7.74629	11.8101
cra_locus_1111_iso_1_len_3318_ver_3	Pentatricopeptide repeat-containing protein	7.74804	7.35162	6.79755	6.17368	14.1168	11.7023	6.94779	6.14358	7.14121	6.67375	3.22683	4.90891	19.5271	16.2309	4.44959	7.16472	4.23004	4.72908	4.58927	4.33039	3.2017	3.57671	2.78509
cra_locus_111209_iso_1_len_579_ver_3	Gene of unknown function	0	10.1025	11.0747	20.4171	0	0	0	9.62201	21.1259	38.4476	28.6874	20.1294	0	0	0	0	0	0	108.988	119.12	197.046	0	0
cra_locus_11120_iso_2_len_1071_ver_3	Plant-specific domain TIGR01589 family protein	5.05722	76.4715	5.50541	64.3939	29.0629	21.883	52.6792	6.68499	176.485	30.5459	5.86471	12.4235	77.0389	37.5938	6.46344	132.829	90.1114	16.8531	23.0816	21.4893	10.8918	17.9227	10.9411
cra_locus_11121_iso_2_len_1207_ver_3	Mannosyl-oligosaccharide glucosidase	13.1358	30.115	21.1529	23.8315	18.3257	15.9189	23.9772	35.9979	42.695	41.8854	19.5203	24.0439	11.5885	15.8697	15.2578	12.914	18.6479	15.2239	17.4114	18.4656	14.8056	23.3292	11.8973
cra_locus_111227_iso_1_len_327_ver_3	Gene of unknown function	0	0	0	0	3.12058	2.68217	6.42262	0	3.06355	2.28235	0	0	0	4.06316	0	0	0	0	3.15057	0	0	0	0
cra_locus_11122_iso_2_len_1118_ver_3	H/ACA ribonucleoprotein complex subunit	20.8668	35.4357	55.5517	50.0046	47.8202	42.0053	31.1028	44.4306	29.9512	34.4073	51.4572	56.3385	19.0956	31.5498	29.3114	24.2684	25.7006	31.5313	33.6234	38.047	31.0239	40.6678	27.5057
cra_locus_11123_iso_1_len_749_ver_3	Gene of unknown function	0	0	0	0	0	0	0.886084	0	0	0	0	0	0	0	0	0	0	0	0	0	0	0	0
cra_locus_111245_iso_1_len_369_ver_3	Gene of unknown function	0	3.05296	9.97541	15.1565	0	0	0	0	0	6.36495	20.8099	36.6325	0	0	0	0	0	0	0	0	0	0	0
cra_locus_11124_iso_1_len_4146_ver_3	WD40	24.6671	10.0109	7.41432	7.19257	19.6351	19.6532	21.089	11.669	11.7527	11.8646	8.36945	8.3363	16.4932	18.9241	24.9855	25.3005	23.6947	21.4498	21.875	24.6566	24.1657	21.7184	17.3769
cra_locus_11125_iso_5_len_3055_ver_3	Zinc finger protein	22.5287	41.6478	46.1143	28.4424	26.012	55.8351	28.8458	34.387	80.3341	95.8726	209.595	91.6193	16.3155	22.9998	10.3488	14.668	33.5819	76.0341	66.0392	85.064	58.6157	30.5125	15.6504
cra_locus_111269_iso_1_len_354_ver_3	Multidrug resistance protein 1, 2	11.6533	0	0	0	2.65695	2.8377	0	0	0	0	0	0	5.65854	1.69106	10.0885	2.93699	18.0244	0	8.8887	0	0	10.3418	0
cra_locus_111270_iso_1_len_558_ver_3	Gene of unknown function	0	40.3984	47.8894	54.3776	0	0	0	42.4844	32.7899	55.8699	33.3037	59.9949	0	0	0	0	0	0	0	0	0	0	0
cra_locus_11127_iso_1_len_2781_ver_3	Conserved gene of unknown function	17.4189	13.7561	11.3937	9.83781	18.1265	15.4603	16.5017	12.4621	12.3044	13.4581	11.0038	10.996	15.7553	19.4038	20.9066	18.6864	16.8219	20.5073	13.6201	17.3611	15.1464	18.9305	14.5125
cra_locus_11128_iso_3_len_2662_ver_3	DNA-binding protein 1	16.5417	15.5837	14.4586	18.7538	9.91437	10.9283	8.87705	10.4411	15.918	15.4519	9.80823	16.1533	11.6588	14.9081	13.9223	10.989	16.5934	14.0742	15.0311	9.83507	8.99862	8.33493	10.0543
cra_locus_111299_iso_1_len_281_ver_3	Ribosome biogenesis GTP-binding protein YsxC	6.22634	2.42299	0	0	0	0	0	0	0	0	0	0	3.92954	0	0	3.55105	0	0	0	19.0108	15.2349	10.9839	6.17948
cra_locus_11129_iso_3_len_2667_ver_3	Alpha-xylosidase	16.777	19.0492	22.1191	14.5781	4.48197	4.405	1.8468	17.5339	12.5215	18.4461	49.9406	25.2857	2.94939	3.06228	4.77535	4.52294	5.42813	16.0774	10.9508	3.73024	4.86501	1.04926	1.21534
cra_locus_1112_iso_3_len_1161_ver_3	Carbonyl reductase	152.42	138.085	133.543	156.138	73.2304	75.9855	49.1858	130.172	178.746	174.459	97.5675	68.5426	222.13	117.111	237.807	180.923	172.711	201.073	163.007	208.859	208.53	179.677	149.621
cra_locus_11130_iso_10_len_2120_ver_3	Inositol-1,4,5-triphosphate-5-phosphatase	26.6513	5.9862	8.83834	7.72449	14.835	12.7025	5.6861	5.22614	4.12789	4.79034	10.5572	9.08917	31.7972	29.8846	7.52088	4.33666	33.5402	12.8853	25.2479	17.462	3.30491	23.6856	5.03787
cra_locus_11131_iso_5_len_3040_ver_3	Mitochondrial transcription termination factor family protein / mTERF family protein	8.84076	5.49554	4.22981	4.93005	16.81	11.9863	9.61179	2.44237	2.5083	2.50527	4.13571	5.05574	30.2096	25.7968	2.95811	7.17239	2.99933	2.45583	3.07016	2.92413	2.62298	2.2982	2.06872
cra_locus_11132_iso_2_len_3355_ver_3	Pentatricopeptide repeat-containing protein	3.23717	28.9141	26.5131	29.3456	6.31086	4.84327	5.45804	28.3304	25.627	24.5948	22.9747	24.8818	5.21025	8.06576	9.56747	7.08502	6.2867	5.00867	5.47192	3.89293	2.9682	6.47939	2.53378
cra_locus_11133_iso_5_len_1819_ver_3	AG-motif binding protein-5	61.4497	4.26392	4.87227	6.87498	40.7078	30.364	50.4811	5.49061	33.1978	19.2401	5.29664	5.46341	57.3362	65.3612	47.6896	71.4892	40.8619	41.0726	39.6608	51.8638	29.7822	37.6092	22.2607
cra_locus_11134_iso_7_len_2425_ver_3	DNA helicase recq1	6.16469	8.43515	8.72436	9.40557	6.87525	7.28771	6.75355	8.40463	8.17475	9.03206	7.14623	10.3195	5.66799	7.80816	9.14347	7.76844	9.98326	6.56257	10.3689	8.05189	5.63107	5.8587	7.91383
cra_locus_11135_iso_4_len_1382_ver_3	Oxidation resistance 1	11.4368	5.09955	4.86004	4.6046	8.44412	7.498	12.9885	7.51799	24.5364	16.8173	3.29451	2.59118	9.56683	11.6417	12.8569	12.4783	12.5678	8.85748	10.6756	7.94289	4.37793	4.89527	3.79135
cra_locus_11136_iso_2_len_1185_ver_3	Gene of unknown function	114.294	641.281	1034.54	1760.43	78.1456	87.3854	76.8627	637.88	1861.13	1498.86	652.574	1068.41	32.6125	26.1872	165.09	162.51	45.7475	67.4953	138.131	57.011	27.0433	46.1781	35.6581
cra_locus_111371_iso_1_len_365_ver_3	Aspartic proteinase nepenthesin-2	13.6872	0	0	0	5.13993	1.82987	5.0058	0	0	0	0	0	11.9991	25.1769	0	5.32657	0	0	0	0	0	0	0
cra_locus_111374_iso_1_len_362_ver_3	Gene of unknown function	0	5.86756	5.82006	6.00528	2.79259	0	0	3.92146	4.98465	10.398	4.24947	4.987	0	3.13465	2.0721	4.1205	0	0	2.60255	0	0	0	0
cra_locus_11137_iso_2_len_1652_ver_3	Peptide chain release factor	21.0352	29.7584	38.2976	30.4243	48.1705	41.8983	50.065	40.4834	25.5682	26.0581	28.3363	27.513	48.5055	55.5186	17.6773	19.3345	17.3949	19.9	21.9821	17.3117	17.0316	18.0291	16.1418
[truncated: 31,422 more rows]
