# Supplementary material for: Development of Transcriptomic Resources for Interrogating the Biosynthesis of Monoterpene Indole Alkaloids in Medicinal Plant Species
Source: PLoS One. 2012 Dec 26;7(12):e52506. doi: 10.1371/journal.pone.0052506 (PMC3530497; doi:10.1371/journal.pone.0052506)
Supplement: Table S10 — List of transcripts in paralogous groups restricted to Catharanthus roseus . (XLSX) [file pone.0052506.s011.xlsx]

## Sheet: SuppTable10
Table S10. List of transcripts in paralogous groups restricted to Catharanthus roseus.
CLUSTER ID	NUMBER OF PROTEINS	NUMBER OF TAXA	TAXA ID	PREDICTED PROTEINS ID
ORTHOMCL17	18	1	Catharanthus_roseus	cra_locus_10135_iso_1_len_1374_ver_3 cra_locus_107410_iso_2_len_564_ver_3 cra_locus_10905_iso_1_len_901_ver_3 cra_locus_109298_iso_3_len_623_ver_3 cra_locus_110957_iso_1_len_387_ver_3 cra_locus_114406_iso_1_len_385_ver_3 cra_locus_123163_iso_1_len_280_ver_3 cra_locus_123178_iso_1_len_301_ver_3 cra_locus_123956_iso_1_len_343_ver_3 cra_locus_124188_iso_1_len_513_ver_3 cra_locus_131872_iso_1_len_448…
ORTHOMCL72	9	1	Catharanthus_roseus	cra_locus_104261_iso_1_len_278_ver_3 cra_locus_110261_iso_1_len_323_ver_3 cra_locus_113101_iso_1_len_353_ver_3 cra_locus_123554_iso_1_len_625_ver_3 cra_locus_19303_iso_1_len_368_ver_3 cra_locus_24239_iso_1_len_541_ver_3 cra_locus_24364_iso_1_len_610_ver_3 cra_locus_25202_iso_2_len_723_ver_3 cra_locus_37682_iso_1_len_890_ver_3
ORTHOMCL74	9	1	Catharanthus_roseus	cra_locus_107623_iso_1_len_604_ver_3 cra_locus_110744_iso_1_len_320_ver_3 cra_locus_123414_iso_1_len_331_ver_3 cra_locus_19606_iso_1_len_813_ver_3 cra_locus_35159_iso_2_len_748_ver_3 cra_locus_39010_iso_1_len_299_ver_3 cra_locus_39011_iso_2_len_437_ver_3 cra_locus_3950_iso_2_len_860_ver_3 cra_locus_40994_iso_1_len_1061_ver_3
ORTHOMCL75	9	1	Catharanthus_roseus	cra_locus_11768_iso_1_len_2532_ver_3 cra_locus_14113_iso_3_len_1803_ver_3 cra_locus_15051_iso_1_len_1394_ver_3 cra_locus_15640_iso_1_len_1844_ver_3 cra_locus_16684_iso_3_len_2462_ver_3 cra_locus_19509_iso_4_len_1759_ver_3 cra_locus_45694_iso_1_len_478_ver_3 cra_locus_47214_iso_1_len_543_ver_3 cra_locus_95447_iso_1_len_322_ver_3
ORTHOMCL100	8	1	Catharanthus_roseus	cra_locus_17709_iso_1_len_492_ver_3 cra_locus_17829_iso_1_len_360_ver_3 cra_locus_18405_iso_3_len_875_ver_3 cra_locus_3822_iso_7_len_1692_ver_3 cra_locus_51940_iso_2_len_383_ver_3 cra_locus_67788_iso_1_len_293_ver_3 cra_locus_88687_iso_1_len_374_ver_3 cra_locus_92073_iso_3_len_359_ver_3
ORTHOMCL170	7	1	Catharanthus_roseus	cra_locus_11433_iso_3_len_2207_ver_3 cra_locus_14222_iso_2_len_2186_ver_3 cra_locus_17941_iso_1_len_1398_ver_3 cra_locus_28665_iso_1_len_947_ver_3 cra_locus_8134_iso_1_len_1637_ver_3 cra_locus_940_iso_7_len_2438_ver_3 cra_locus_9663_iso_1_len_1851_ver_3
ORTHOMCL171	7	1	Catharanthus_roseus	cra_locus_11531_iso_6_len_1522_ver_3 cra_locus_123433_iso_1_len_427_ver_3 cra_locus_12990_iso_5_len_1777_ver_3 cra_locus_28705_iso_3_len_671_ver_3 cra_locus_28959_iso_2_len_1064_ver_3 cra_locus_30416_iso_1_len_540_ver_3 cra_locus_9321_iso_2_len_784_ver_3
ORTHOMCL173	7	1	Catharanthus_roseus	cra_locus_17038_iso_1_len_410_ver_3 cra_locus_17831_iso_2_len_418_ver_3 cra_locus_18841_iso_2_len_1237_ver_3 cra_locus_24857_iso_1_len_260_ver_3 cra_locus_33765_iso_1_len_481_ver_3 cra_locus_47203_iso_3_len_328_ver_3 cra_locus_8597_iso_1_len_507_ver_3
ORTHOMCL174	7	1	Catharanthus_roseus	cra_locus_18048_iso_1_len_509_ver_3 cra_locus_26532_iso_2_len_839_ver_3 cra_locus_30134_iso_1_len_336_ver_3 cra_locus_31915_iso_1_len_380_ver_3 cra_locus_42601_iso_1_len_312_ver_3 cra_locus_5320_iso_8_len_2198_ver_3 cra_locus_60951_iso_1_len_336_ver_3
ORTHOMCL348	6	1	Catharanthus_roseus	cra_locus_107691_iso_1_len_279_ver_3 cra_locus_16295_iso_1_len_1257_ver_3 cra_locus_18221_iso_1_len_312_ver_3 cra_locus_18677_iso_3_len_1139_ver_3 cra_locus_53303_iso_2_len_525_ver_3 cra_locus_5951_iso_5_len_1385_ver_3
ORTHOMCL349	6	1	Catharanthus_roseus	cra_locus_111723_iso_1_len_259_ver_3 cra_locus_21826_iso_1_len_838_ver_3 cra_locus_22180_iso_1_len_320_ver_3 cra_locus_23641_iso_1_len_1820_ver_3 cra_locus_26378_iso_1_len_1610_ver_3 cra_locus_31911_iso_1_len_477_ver_3
ORTHOMCL351	6	1	Catharanthus_roseus	cra_locus_15044_iso_1_len_1423_ver_3 cra_locus_16985_iso_1_len_1918_ver_3 cra_locus_22748_iso_1_len_724_ver_3 cra_locus_25951_iso_1_len_724_ver_3 cra_locus_34795_iso_1_len_569_ver_3 cra_locus_49803_iso_1_len_734_ver_3
ORTHOMCL748	5	1	Catharanthus_roseus	cra_locus_10620_iso_3_len_1857_ver_3 cra_locus_1100_iso_3_len_1965_ver_3 cra_locus_19361_iso_2_len_1415_ver_3 cra_locus_20528_iso_1_len_1485_ver_3 cra_locus_2235_iso_3_len_1906_ver_3
ORTHOMCL750	5	1	Catharanthus_roseus	cra_locus_11061_iso_1_len_1656_ver_3 cra_locus_12977_iso_1_len_1347_ver_3 cra_locus_22436_iso_1_len_814_ver_3 cra_locus_23618_iso_1_len_1053_ver_3 cra_locus_8714_iso_1_len_922_ver_3
ORTHOMCL751	5	1	Catharanthus_roseus	cra_locus_11674_iso_2_len_1455_ver_3 cra_locus_19410_iso_1_len_3208_ver_3 cra_locus_44625_iso_1_len_484_ver_3 cra_locus_5726_iso_1_len_2028_ver_3 cra_locus_7255_iso_1_len_1975_ver_3
ORTHOMCL752	5	1	Catharanthus_roseus	cra_locus_11695_iso_1_len_1003_ver_3 cra_locus_15341_iso_4_len_844_ver_3 cra_locus_15727_iso_4_len_1210_ver_3 cra_locus_18239_iso_3_len_519_ver_3 cra_locus_22920_iso_1_len_567_ver_3
ORTHOMCL3040	4	1	Catharanthus_roseus	cra_locus_11390_iso_2_len_1639_ver_3 cra_locus_13280_iso_1_len_1052_ver_3 cra_locus_17167_iso_1_len_1658_ver_3 cra_locus_40578_iso_1_len_335_ver_3
ORTHOMCL3044	4	1	Catharanthus_roseus	cra_locus_12153_iso_8_len_1112_ver_3 cra_locus_32263_iso_1_len_632_ver_3 cra_locus_6454_iso_3_len_1002_ver_3 cra_locus_8821_iso_2_len_932_ver_3
ORTHOMCL3045	4	1	Catharanthus_roseus	cra_locus_124727_iso_1_len_351_ver_3 cra_locus_21204_iso_2_len_659_ver_3 cra_locus_30913_iso_1_len_326_ver_3 cra_locus_31313_iso_1_len_285_ver_3
ORTHOMCL3048	4	1	Catharanthus_roseus	cra_locus_13493_iso_1_len_1587_ver_3 cra_locus_7740_iso_3_len_931_ver_3 cra_locus_7824_iso_5_len_1502_ver_3 cra_locus_85930_iso_1_len_445_ver_3
ORTHOMCL3051	4	1	Catharanthus_roseus	cra_locus_15779_iso_1_len_838_ver_3 cra_locus_19116_iso_1_len_1007_ver_3 cra_locus_21021_iso_9_len_2456_ver_3 cra_locus_24278_iso_1_len_310_ver_3
ORTHOMCL11341	3	1	Catharanthus_roseus	cra_locus_112051_iso_1_len_534_ver_3 cra_locus_30503_iso_1_len_1894_ver_3 cra_locus_31730_iso_2_len_565_ver_3
ORTHOMCL11344	3	1	Catharanthus_roseus	cra_locus_11594_iso_1_len_1339_ver_3 cra_locus_15265_iso_1_len_500_ver_3 cra_locus_9393_iso_1_len_941_ver_3
ORTHOMCL11346	3	1	Catharanthus_roseus	cra_locus_118829_iso_1_len_400_ver_3 cra_locus_123227_iso_1_len_464_ver_3 cra_locus_31056_iso_2_len_420_ver_3
ORTHOMCL11348	3	1	Catharanthus_roseus	cra_locus_123120_iso_2_len_605_ver_3 cra_locus_24543_iso_4_len_807_ver_3 cra_locus_26954_iso_2_len_427_ver_3
ORTHOMCL11349	3	1	Catharanthus_roseus	cra_locus_123219_iso_1_len_676_ver_3 cra_locus_123276_iso_1_len_321_ver_3 cra_locus_123378_iso_1_len_352_ver_3
ORTHOMCL11350	3	1	Catharanthus_roseus	cra_locus_123896_iso_1_len_476_ver_3 cra_locus_8187_iso_5_len_2273_ver_3 cra_locus_89942_iso_1_len_343_ver_3
ORTHOMCL11351	3	1	Catharanthus_roseus	cra_locus_12398_iso_2_len_894_ver_3 cra_locus_1269_iso_1_len_4262_ver_3 cra_locus_22255_iso_4_len_1509_ver_3
ORTHOMCL11352	3	1	Catharanthus_roseus	cra_locus_12569_iso_2_len_545_ver_3 cra_locus_14425_iso_2_len_595_ver_3 cra_locus_92228_iso_1_len_262_ver_3
ORTHOMCL11354	3	1	Catharanthus_roseus	cra_locus_1300_iso_1_len_1426_ver_3 cra_locus_7664_iso_1_len_1586_ver_3 cra_locus_8750_iso_1_len_1492_ver_3
ORTHOMCL11356	3	1	Catharanthus_roseus	cra_locus_132917_iso_2_len_340_ver_3 cra_locus_132918_iso_1_len_251_ver_3 cra_locus_132938_iso_1_len_648_ver_3
ORTHOMCL11359	3	1	Catharanthus_roseus	cra_locus_14438_iso_3_len_925_ver_3 cra_locus_28852_iso_1_len_880_ver_3 cra_locus_5942_iso_6_len_973_ver_3
ORTHOMCL11365	3	1	Catharanthus_roseus	cra_locus_18307_iso_1_len_749_ver_3 cra_locus_22007_iso_2_len_641_ver_3 cra_locus_23665_iso_1_len_1014_ver_3
ORTHOMCL11366	3	1	Catharanthus_roseus	cra_locus_18339_iso_1_len_787_ver_3 cra_locus_19260_iso_1_len_975_ver_3 cra_locus_2612_iso_1_len_1059_ver_3
ORTHOMCL11370	3	1	Catharanthus_roseus	cra_locus_19516_iso_1_len_359_ver_3 cra_locus_24630_iso_1_len_455_ver_3 cra_locus_36694_iso_1_len_444_ver_3
ORTHOMCL11372	3	1	Catharanthus_roseus	cra_locus_20864_iso_1_len_465_ver_3 cra_locus_30653_iso_1_len_760_ver_3 cra_locus_90044_iso_1_len_796_ver_3
ORTHOMCL11381	3	1	Catharanthus_roseus	cra_locus_24706_iso_2_len_1059_ver_3 cra_locus_27651_iso_2_len_483_ver_3 cra_locus_34930_iso_1_len_336_ver_3
ORTHOMCL11387	3	1	Catharanthus_roseus	cra_locus_2957_iso_3_len_1732_ver_3 cra_locus_7068_iso_4_len_1697_ver_3 cra_locus_714_iso_4_len_1856_ver_3
ORTHOMCL11397	3	1	Catharanthus_roseus	cra_locus_47123_iso_1_len_644_ver_3 cra_locus_52714_iso_1_len_517_ver_3 cra_locus_93717_iso_1_len_359_ver_3
ORTHOMCL11398	3	1	Catharanthus_roseus	cra_locus_47516_iso_1_len_359_ver_3 cra_locus_5222_iso_8_len_2303_ver_3 cra_locus_57546_iso_1_len_380_ver_3
ORTHOMCL11414	3	1	Catharanthus_roseus	cra_locus_58938_iso_1_len_483_ver_3 cra_locus_63000_iso_1_len_364_ver_3 cra_locus_66783_iso_1_len_356_ver_3
ORTHOMCL14004	2	1	Catharanthus_roseus	cra_locus_101013_iso_1_len_782_ver_3 cra_locus_13634_iso_2_len_481_ver_3
ORTHOMCL14006	2	1	Catharanthus_roseus	cra_locus_10112_iso_1_len_331_ver_3 cra_locus_36451_iso_2_len_318_ver_3
ORTHOMCL14007	2	1	Catharanthus_roseus	cra_locus_10119_iso_1_len_756_ver_3 cra_locus_33726_iso_1_len_713_ver_3
ORTHOMCL14012	2	1	Catharanthus_roseus	cra_locus_101645_iso_1_len_385_ver_3 cra_locus_17398_iso_1_len_370_ver_3
ORTHOMCL14023	2	1	Catharanthus_roseus	cra_locus_102921_iso_1_len_351_ver_3 cra_locus_81792_iso_1_len_287_ver_3
ORTHOMCL14026	2	1	Catharanthus_roseus	cra_locus_10317_iso_6_len_1583_ver_3 cra_locus_61367_iso_1_len_562_ver_3
ORTHOMCL14058	2	1	Catharanthus_roseus	cra_locus_105406_iso_1_len_500_ver_3 cra_locus_92304_iso_1_len_587_ver_3
ORTHOMCL14062	2	1	Catharanthus_roseus	cra_locus_10586_iso_1_len_999_ver_3 cra_locus_17181_iso_1_len_1195_ver_3
ORTHOMCL14071	2	1	Catharanthus_roseus	cra_locus_106309_iso_1_len_363_ver_3 cra_locus_98795_iso_1_len_343_ver_3
ORTHOMCL14094	2	1	Catharanthus_roseus	cra_locus_108366_iso_2_len_1055_ver_3 cra_locus_17744_iso_1_len_2024_ver_3
ORTHOMCL14099	2	1	Catharanthus_roseus	cra_locus_108687_iso_1_len_451_ver_3 cra_locus_93851_iso_1_len_779_ver_3
ORTHOMCL14117	2	1	Catharanthus_roseus	cra_locus_110190_iso_1_len_1457_ver_3 cra_locus_31838_iso_1_len_2148_ver_3
ORTHOMCL14125	2	1	Catharanthus_roseus	cra_locus_110654_iso_1_len_375_ver_3 cra_locus_113694_iso_3_len_409_ver_3
ORTHOMCL14146	2	1	Catharanthus_roseus	cra_locus_11275_iso_2_len_2420_ver_3 cra_locus_18800_iso_4_len_2344_ver_3
ORTHOMCL14153	2	1	Catharanthus_roseus	cra_locus_113381_iso_1_len_1203_ver_3 cra_locus_123556_iso_1_len_333_ver_3
ORTHOMCL14168	2	1	Catharanthus_roseus	cra_locus_11429_iso_1_len_2771_ver_3 cra_locus_8790_iso_8_len_5205_ver_3
ORTHOMCL14169	2	1	Catharanthus_roseus	cra_locus_114342_iso_1_len_912_ver_3 cra_locus_13733_iso_1_len_705_ver_3
ORTHOMCL14212	2	1	Catharanthus_roseus	cra_locus_1182_iso_6_len_2423_ver_3 cra_locus_539_iso_3_len_1184_ver_3
ORTHOMCL14218	2	1	Catharanthus_roseus	cra_locus_11890_iso_1_len_500_ver_3 cra_locus_43846_iso_2_len_622_ver_3
ORTHOMCL14228	2	1	Catharanthus_roseus	cra_locus_11982_iso_2_len_706_ver_3 cra_locus_6438_iso_2_len_751_ver_3
ORTHOMCL14232	2	1	Catharanthus_roseus	cra_locus_120142_iso_1_len_379_ver_3 cra_locus_124384_iso_1_len_511_ver_3
ORTHOMCL14235	2	1	Catharanthus_roseus	cra_locus_120423_iso_1_len_623_ver_3 cra_locus_123148_iso_1_len_346_ver_3
ORTHOMCL14238	2	1	Catharanthus_roseus	cra_locus_120672_iso_1_len_1120_ver_3 cra_locus_86551_iso_1_len_291_ver_3
ORTHOMCL14259	2	1	Catharanthus_roseus	cra_locus_123649_iso_1_len_332_ver_3 cra_locus_52311_iso_1_len_333_ver_3
ORTHOMCL14260	2	1	Catharanthus_roseus	cra_locus_123742_iso_1_len_334_ver_3 cra_locus_124235_iso_1_len_468_ver_3
ORTHOMCL14317	2	1	Catharanthus_roseus	cra_locus_130726_iso_1_len_617_ver_3 cra_locus_131887_iso_1_len_280_ver_3
ORTHOMCL14329	2	1	Catharanthus_roseus	cra_locus_13233_iso_1_len_1169_ver_3 cra_locus_22343_iso_1_len_1451_ver_3
ORTHOMCL14360	2	1	Catharanthus_roseus	cra_locus_13557_iso_1_len_698_ver_3 cra_locus_64376_iso_1_len_522_ver_3
ORTHOMCL14368	2	1	Catharanthus_roseus	cra_locus_1366_iso_10_len_6971_ver_3 cra_locus_75126_iso_1_len_280_ver_3
ORTHOMCL14387	2	1	Catharanthus_roseus	cra_locus_13838_iso_1_len_1563_ver_3 cra_locus_33209_iso_1_len_332_ver_3
ORTHOMCL14396	2	1	Catharanthus_roseus	cra_locus_13959_iso_1_len_431_ver_3 cra_locus_29587_iso_1_len_368_ver_3
ORTHOMCL14415	2	1	Catharanthus_roseus	cra_locus_14205_iso_1_len_646_ver_3 cra_locus_68033_iso_1_len_331_ver_3
ORTHOMCL14427	2	1	Catharanthus_roseus	cra_locus_14353_iso_1_len_410_ver_3 cra_locus_16008_iso_2_len_636_ver_3
ORTHOMCL14446	2	1	Catharanthus_roseus	cra_locus_14527_iso_2_len_1026_ver_3 cra_locus_15701_iso_1_len_1125_ver_3
ORTHOMCL14454	2	1	Catharanthus_roseus	cra_locus_14596_iso_1_len_354_ver_3 cra_locus_15734_iso_1_len_393_ver_3
ORTHOMCL14503	2	1	Catharanthus_roseus	cra_locus_15353_iso_2_len_1369_ver_3 cra_locus_5608_iso_2_len_1934_ver_3
ORTHOMCL14509	2	1	Catharanthus_roseus	cra_locus_1544_iso_3_len_1242_ver_3 cra_locus_81469_iso_1_len_401_ver_3
ORTHOMCL14522	2	1	Catharanthus_roseus	cra_locus_15598_iso_1_len_1411_ver_3 cra_locus_2040_iso_1_len_1332_ver_3
ORTHOMCL14527	2	1	Catharanthus_roseus	cra_locus_15681_iso_1_len_1049_ver_3 cra_locus_21741_iso_2_len_1026_ver_3
ORTHOMCL14537	2	1	Catharanthus_roseus	cra_locus_157_iso_6_len_1837_ver_3 cra_locus_1612_iso_6_len_1290_ver_3
ORTHOMCL14557	2	1	Catharanthus_roseus	cra_locus_16106_iso_1_len_347_ver_3 cra_locus_34703_iso_1_len_466_ver_3
ORTHOMCL14567	2	1	Catharanthus_roseus	cra_locus_16244_iso_1_len_928_ver_3 cra_locus_58164_iso_1_len_765_ver_3
ORTHOMCL14570	2	1	Catharanthus_roseus	cra_locus_16297_iso_1_len_809_ver_3 cra_locus_3077_iso_3_len_2680_ver_3
ORTHOMCL14574	2	1	Catharanthus_roseus	cra_locus_16355_iso_1_len_608_ver_3 cra_locus_65553_iso_1_len_585_ver_3
ORTHOMCL14627	2	1	Catharanthus_roseus	cra_locus_17176_iso_1_len_2007_ver_3 cra_locus_19757_iso_2_len_2379_ver_3
ORTHOMCL14635	2	1	Catharanthus_roseus	cra_locus_17257_iso_3_len_1235_ver_3 cra_locus_4319_iso_2_len_1375_ver_3
ORTHOMCL14666	2	1	Catharanthus_roseus	cra_locus_17731_iso_1_len_1102_ver_3 cra_locus_26643_iso_1_len_1063_ver_3
ORTHOMCL14693	2	1	Catharanthus_roseus	cra_locus_18124_iso_1_len_1182_ver_3 cra_locus_4386_iso_3_len_2298_ver_3
ORTHOMCL14697	2	1	Catharanthus_roseus	cra_locus_18189_iso_1_len_821_ver_3 cra_locus_19513_iso_1_len_1035_ver_3
ORTHOMCL14811	2	1	Catharanthus_roseus	cra_locus_20443_iso_1_len_506_ver_3 cra_locus_94707_iso_1_len_578_ver_3
ORTHOMCL14823	2	1	Catharanthus_roseus	cra_locus_20664_iso_1_len_687_ver_3 cra_locus_36433_iso_1_len_622_ver_3
ORTHOMCL14828	2	1	Catharanthus_roseus	cra_locus_20779_iso_1_len_281_ver_3 cra_locus_25887_iso_1_len_431_ver_3
ORTHOMCL14833	2	1	Catharanthus_roseus	cra_locus_20808_iso_1_len_717_ver_3 cra_locus_5995_iso_4_len_823_ver_3
ORTHOMCL14864	2	1	Catharanthus_roseus	cra_locus_21345_iso_1_len_767_ver_3 cra_locus_38051_iso_1_len_624_ver_3
ORTHOMCL14912	2	1	Catharanthus_roseus	cra_locus_22258_iso_1_len_639_ver_3 cra_locus_5193_iso_1_len_530_ver_3
ORTHOMCL14922	2	1	Catharanthus_roseus	cra_locus_22543_iso_1_len_1334_ver_3 cra_locus_37547_iso_1_len_1301_ver_3
ORTHOMCL14943	2	1	Catharanthus_roseus	cra_locus_23015_iso_1_len_662_ver_3 cra_locus_5424_iso_1_len_851_ver_3
ORTHOMCL14945	2	1	Catharanthus_roseus	cra_locus_23049_iso_1_len_737_ver_3 cra_locus_46696_iso_1_len_505_ver_3
ORTHOMCL14954	2	1	Catharanthus_roseus	cra_locus_23310_iso_1_len_973_ver_3 cra_locus_9045_iso_1_len_1351_ver_3
ORTHOMCL14959	2	1	Catharanthus_roseus	cra_locus_23452_iso_1_len_321_ver_3 cra_locus_38456_iso_1_len_1259_ver_3
ORTHOMCL14979	2	1	Catharanthus_roseus	cra_locus_24074_iso_3_len_872_ver_3 cra_locus_32588_iso_1_len_327_ver_3
ORTHOMCL14983	2	1	Catharanthus_roseus	cra_locus_24190_iso_1_len_451_ver_3 cra_locus_33360_iso_1_len_281_ver_3
ORTHOMCL14996	2	1	Catharanthus_roseus	cra_locus_24551_iso_1_len_753_ver_3 cra_locus_29772_iso_1_len_285_ver_3
ORTHOMCL15006	2	1	Catharanthus_roseus	cra_locus_24695_iso_1_len_311_ver_3 cra_locus_36455_iso_1_len_303_ver_3
ORTHOMCL15018	2	1	Catharanthus_roseus	cra_locus_25115_iso_1_len_726_ver_3 cra_locus_36867_iso_1_len_411_ver_3
ORTHOMCL15021	2	1	Catharanthus_roseus	cra_locus_25257_iso_1_len_497_ver_3 cra_locus_25485_iso_1_len_619_ver_3
ORTHOMCL15036	2	1	Catharanthus_roseus	cra_locus_25637_iso_1_len_442_ver_3 cra_locus_40243_iso_1_len_556_ver_3
ORTHOMCL15072	2	1	Catharanthus_roseus	cra_locus_26741_iso_1_len_376_ver_3 cra_locus_33228_iso_1_len_322_ver_3
ORTHOMCL15074	2	1	Catharanthus_roseus	cra_locus_26814_iso_2_len_412_ver_3 cra_locus_28349_iso_1_len_1163_ver_3
ORTHOMCL15084	2	1	Catharanthus_roseus	cra_locus_27181_iso_1_len_448_ver_3 cra_locus_29064_iso_1_len_304_ver_3
ORTHOMCL15090	2	1	Catharanthus_roseus	cra_locus_27434_iso_1_len_1109_ver_3 cra_locus_7914_iso_1_len_1196_ver_3
ORTHOMCL15094	2	1	Catharanthus_roseus	cra_locus_27561_iso_1_len_405_ver_3 cra_locus_40375_iso_1_len_488_ver_3
ORTHOMCL15116	2	1	Catharanthus_roseus	cra_locus_2841_iso_2_len_1167_ver_3 cra_locus_97811_iso_1_len_288_ver_3
ORTHOMCL15145	2	1	Catharanthus_roseus	cra_locus_29701_iso_2_len_422_ver_3 cra_locus_735_iso_10_len_2283_ver_3
ORTHOMCL15184	2	1	Catharanthus_roseus	cra_locus_31276_iso_4_len_1071_ver_3 cra_locus_41613_iso_1_len_812_ver_3
ORTHOMCL15188	2	1	Catharanthus_roseus	cra_locus_3161_iso_2_len_1252_ver_3 cra_locus_669_iso_2_len_1186_ver_3
ORTHOMCL15216	2	1	Catharanthus_roseus	cra_locus_3290_iso_1_len_1157_ver_3 cra_locus_35495_iso_1_len_423_ver_3
ORTHOMCL15245	2	1	Catharanthus_roseus	cra_locus_34038_iso_2_len_1172_ver_3 cra_locus_41871_iso_1_len_1104_ver_3
ORTHOMCL15280	2	1	Catharanthus_roseus	cra_locus_35371_iso_1_len_505_ver_3 cra_locus_87502_iso_1_len_595_ver_3
ORTHOMCL15298	2	1	Catharanthus_roseus	cra_locus_36615_iso_1_len_279_ver_3 cra_locus_49258_iso_1_len_348_ver_3
ORTHOMCL15310	2	1	Catharanthus_roseus	cra_locus_37554_iso_1_len_578_ver_3 cra_locus_96937_iso_1_len_429_ver_3
ORTHOMCL15412	2	1	Catharanthus_roseus	cra_locus_4385_iso_10_len_1374_ver_3 cra_locus_4868_iso_2_len_1362_ver_3
ORTHOMCL15419	2	1	Catharanthus_roseus	cra_locus_442_iso_1_len_2326_ver_3 cra_locus_88678_iso_1_len_288_ver_3
ORTHOMCL15434	2	1	Catharanthus_roseus	cra_locus_45262_iso_2_len_386_ver_3 cra_locus_99101_iso_3_len_1105_ver_3
ORTHOMCL15443	2	1	Catharanthus_roseus	cra_locus_45807_iso_1_len_402_ver_3 cra_locus_46167_iso_1_len_374_ver_3
ORTHOMCL15506	2	1	Catharanthus_roseus	cra_locus_5034_iso_8_len_2450_ver_3 cra_locus_6391_iso_5_len_2248_ver_3
ORTHOMCL15530	2	1	Catharanthus_roseus	cra_locus_522_iso_4_len_1104_ver_3 cra_locus_7069_iso_1_len_1052_ver_3
ORTHOMCL15544	2	1	Catharanthus_roseus	cra_locus_5316_iso_3_len_3139_ver_3 cra_locus_8476_iso_1_len_937_ver_3
ORTHOMCL15549	2	1	Catharanthus_roseus	cra_locus_53463_iso_2_len_336_ver_3 cra_locus_68017_iso_1_len_302_ver_3
ORTHOMCL15552	2	1	Catharanthus_roseus	cra_locus_53537_iso_1_len_455_ver_3 cra_locus_63972_iso_1_len_311_ver_3
ORTHOMCL15573	2	1	Catharanthus_roseus	cra_locus_54134_iso_2_len_423_ver_3 cra_locus_60654_iso_1_len_339_ver_3
ORTHOMCL15577	2	1	Catharanthus_roseus	cra_locus_54304_iso_1_len_543_ver_3 cra_locus_55601_iso_1_len_544_ver_3
ORTHOMCL15581	2	1	Catharanthus_roseus	cra_locus_54412_iso_1_len_667_ver_3 cra_locus_76065_iso_1_len_284_ver_3
ORTHOMCL15584	2	1	Catharanthus_roseus	cra_locus_54477_iso_1_len_295_ver_3 cra_locus_96029_iso_1_len_334_ver_3
ORTHOMCL15596	2	1	Catharanthus_roseus	cra_locus_55011_iso_1_len_298_ver_3 cra_locus_74010_iso_1_len_313_ver_3
ORTHOMCL15624	2	1	Catharanthus_roseus	cra_locus_55832_iso_1_len_343_ver_3 cra_locus_61984_iso_1_len_499_ver_3
ORTHOMCL15638	2	1	Catharanthus_roseus	cra_locus_56278_iso_1_len_283_ver_3 cra_locus_76146_iso_1_len_305_ver_3
ORTHOMCL15640	2	1	Catharanthus_roseus	cra_locus_56316_iso_1_len_277_ver_3 cra_locus_66298_iso_1_len_417_ver_3
ORTHOMCL15651	2	1	Catharanthus_roseus	cra_locus_56834_iso_1_len_467_ver_3 cra_locus_69943_iso_1_len_434_ver_3
ORTHOMCL15652	2	1	Catharanthus_roseus	cra_locus_56873_iso_1_len_300_ver_3 cra_locus_79205_iso_3_len_514_ver_3
ORTHOMCL15653	2	1	Catharanthus_roseus	cra_locus_56931_iso_1_len_395_ver_3 cra_locus_62954_iso_1_len_291_ver_3
ORTHOMCL15654	2	1	Catharanthus_roseus	cra_locus_56951_iso_1_len_414_ver_3 cra_locus_69402_iso_1_len_287_ver_3
ORTHOMCL15655	2	1	Catharanthus_roseus	cra_locus_56960_iso_1_len_520_ver_3 cra_locus_57190_iso_1_len_395_ver_3
ORTHOMCL15673	2	1	Catharanthus_roseus	cra_locus_57703_iso_1_len_411_ver_3 cra_locus_80136_iso_1_len_298_ver_3
ORTHOMCL15688	2	1	Catharanthus_roseus	cra_locus_58262_iso_1_len_645_ver_3 cra_locus_72863_iso_1_len_479_ver_3
ORTHOMCL15702	2	1	Catharanthus_roseus	cra_locus_58837_iso_1_len_287_ver_3 cra_locus_66812_iso_1_len_321_ver_3
ORTHOMCL15730	2	1	Catharanthus_roseus	cra_locus_60171_iso_1_len_483_ver_3 cra_locus_60998_iso_1_len_456_ver_3
ORTHOMCL15743	2	1	Catharanthus_roseus	cra_locus_61031_iso_1_len_396_ver_3 cra_locus_63667_iso_1_len_282_ver_3
ORTHOMCL15756	2	1	Catharanthus_roseus	cra_locus_61566_iso_1_len_463_ver_3 cra_locus_62536_iso_1_len_397_ver_3
ORTHOMCL15770	2	1	Catharanthus_roseus	cra_locus_62064_iso_1_len_783_ver_3 cra_locus_79809_iso_1_len_412_ver_3
ORTHOMCL15788	2	1	Catharanthus_roseus	cra_locus_628_iso_6_len_1818_ver_3 cra_locus_8508_iso_2_len_1500_ver_3
ORTHOMCL15803	2	1	Catharanthus_roseus	cra_locus_63541_iso_2_len_383_ver_3 cra_locus_88604_iso_1_len_294_ver_3
ORTHOMCL15816	2	1	Catharanthus_roseus	cra_locus_64061_iso_1_len_287_ver_3 cra_locus_67224_iso_1_len_287_ver_3
ORTHOMCL15823	2	1	Catharanthus_roseus	cra_locus_64383_iso_1_len_299_ver_3 cra_locus_66400_iso_1_len_301_ver_3
ORTHOMCL15873	2	1	Catharanthus_roseus	cra_locus_67728_iso_2_len_370_ver_3 cra_locus_82513_iso_1_len_355_ver_3
ORTHOMCL15880	2	1	Catharanthus_roseus	cra_locus_68104_iso_1_len_352_ver_3 cra_locus_77656_iso_1_len_279_ver_3
ORTHOMCL15882	2	1	Catharanthus_roseus	cra_locus_68299_iso_1_len_286_ver_3 cra_locus_96141_iso_1_len_351_ver_3
ORTHOMCL15899	2	1	Catharanthus_roseus	cra_locus_69488_iso_1_len_294_ver_3 cra_locus_82932_iso_1_len_279_ver_3
ORTHOMCL15987	2	1	Catharanthus_roseus	cra_locus_75206_iso_1_len_651_ver_3 cra_locus_9713_iso_4_len_1584_ver_3
ORTHOMCL16025	2	1	Catharanthus_roseus	cra_locus_7795_iso_1_len_328_ver_3 cra_locus_8211_iso_3_len_768_ver_3
ORTHOMCL16049	2	1	Catharanthus_roseus	cra_locus_8026_iso_1_len_990_ver_3 cra_locus_87748_iso_1_len_303_ver_3
ORTHOMCL16050	2	1	Catharanthus_roseus	cra_locus_80275_iso_1_len_290_ver_3 cra_locus_96604_iso_1_len_312_ver_3
ORTHOMCL16056	2	1	Catharanthus_roseus	cra_locus_80819_iso_1_len_398_ver_3 cra_locus_97224_iso_1_len_298_ver_3
ORTHOMCL16119	2	1	Catharanthus_roseus	cra_locus_85751_iso_1_len_730_ver_3 cra_locus_90070_iso_1_len_397_ver_3
